# Supplementary material for: β-Selective xylulofuranosylation via a conformationally-restricted glycosyl donor
Source: Royal Society of Chemistry journal article supplement (doi:10.1039/d0ob00260g), 2020-01-01
Supplement: d0ob00260g1.pdf [file d0ob00260g1.pdf]

*Supporting Information for*

**$\beta$ -Selective Xylulofuranosylation via a Conformationally-Restricted Donor**

Bo-Shun Huang, Todd L. Lowary\*

Alberta Glycomics Centre and Department of Chemistry, University of Alberta,

Edmonton, Alberta T6G2G2, Canada

Email: tlowary@ualberta.ca

**Table of Contents**

---

|                                                                           |           |
|---------------------------------------------------------------------------|-----------|
| General Experimental Methods                                              | S2        |
| Scheme S1. Synthesis of <b>27</b>                                         | S3        |
| Scheme S2. Synthesis of <b>52</b>                                         | S3        |
| Scheme S3. Synthesis of <b>53</b>                                         | S3        |
| Figure S1. X-ray crystallography structure of <b>8</b>                    | S4        |
| Figure S2. X-ray crystallography structure of <b>49<math>\beta</math></b> | S4        |
| Experimental details and data for new compounds                           | S5–S85    |
| References                                                                | S86       |
| <sup>1</sup> H and <sup>13</sup> C NMR spectrum of all new compounds      | S87–S216  |
| 2D <sup>1</sup> H– <sup>1</sup> H TROESY spectrum of compound <b>36</b>   | S217–S218 |

---

## General Experimental Methods

Reactions were carried out in oven-dried glassware. All reagents used were purchased from commercial sources and were used without further purification unless noted. Solvents used in reactions were purified by successive passage through columns of alumina and copper under nitrogen. Unless stated otherwise, all reactions were carried out at rt under a positive pressure of argon and were monitored by TLC on silica gel 60 F<sub>254</sub> (0.25 mm, E. Merck). Spots were detected under UV light or by charring with 10% H<sub>2</sub>SO<sub>4</sub>, in EtOH. Unless otherwise indicated, all column chromatography was performed on silica gel 60 (40–60  $\mu$ m). Iatrobeads refers to a beaded silica gel 6RS–8060, which is manufactured by Iatron Laboratories (Tokyo). The ratio between silica gel and crude product ranged from 100 to 50:1 (w/w). Optical rotations were measured at  $22 \pm 2$  °C at the sodium D line (589 nm) and are in units of  $\text{deg} \cdot \text{mL}(\text{dm} \cdot \text{g})^{-1}$ . <sup>1</sup>H NMR spectra were recorded at 500 or 700 MHz, and chemical shifts are referenced to either CHCl<sub>3</sub> (7.26 ppm, CDCl<sub>3</sub>) or HOD (4.78 ppm, D<sub>2</sub>O). <sup>13</sup>C NMR spectra were recorded at 125 or 175 MHz, and <sup>13</sup>C chemical shifts were referenced to internal CDCl<sub>3</sub> (77.23 ppm, CDCl<sub>3</sub>), external dioxane (67.40 ppm, D<sub>2</sub>O). Assignments of resonances, including those for mixtures of compounds, were made on the basis of 2D NMR experiments including <sup>1</sup>H–<sup>1</sup>H-COSY, HMQC, HMBC and <sup>1</sup>H–<sup>1</sup>H-TROESY. Assignments with “app” represent apparent. In the processing of reaction mixtures, solutions of organic solvents were washed with equal amounts of aqueous solutions. Organic solutions were concentrated under vacuum at < 40 °C (bath). Electrospray mass spectra were recorded on samples suspended in mixtures of THF with CH<sub>3</sub>OH and added NaCl.

**Scheme S1. Synthesis of 27**

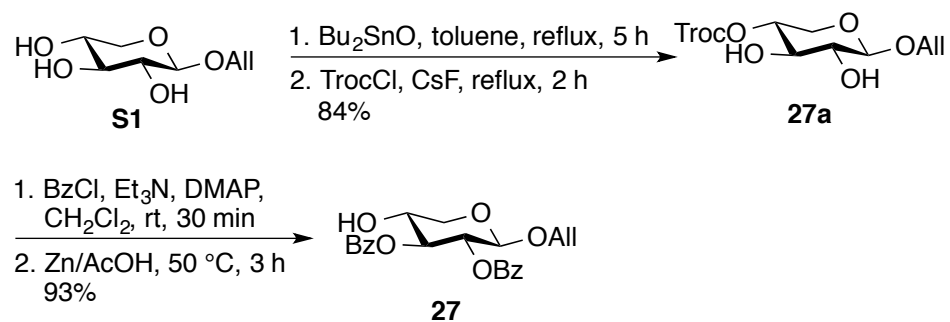

**Scheme S2. Synthesis of 52**

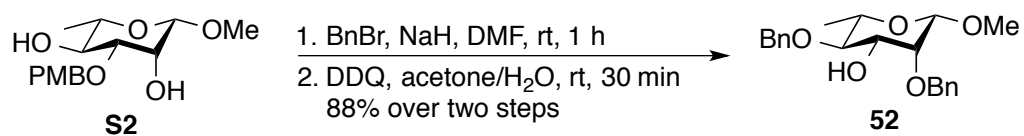

**Scheme S3. Synthesis of 53**

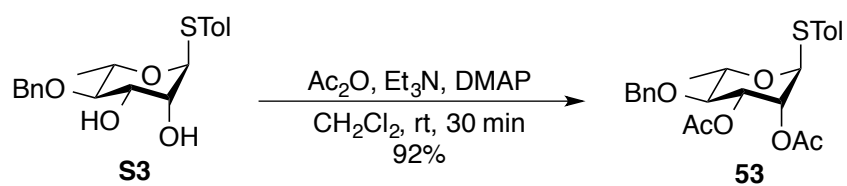

**Figure S1.** X-ray crystallography structure of compound **8**

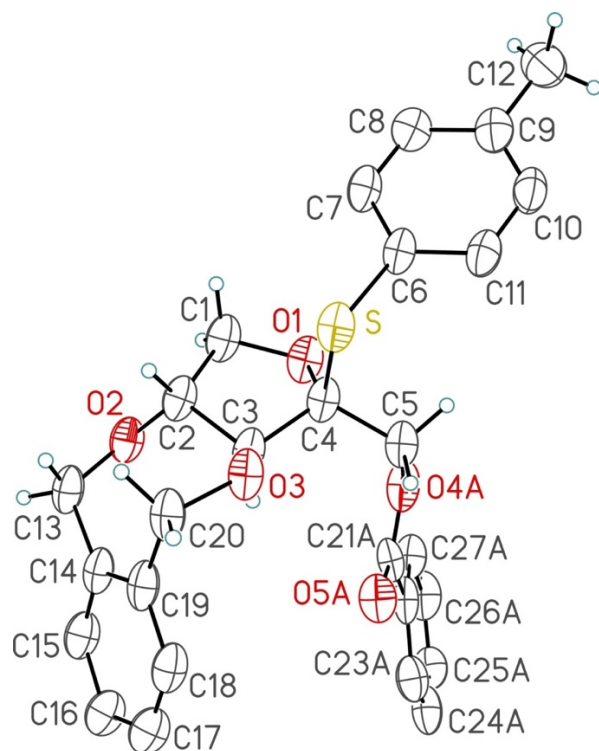

**Figure S2.** X-ray crystallography structure of compound **49 $\beta$**

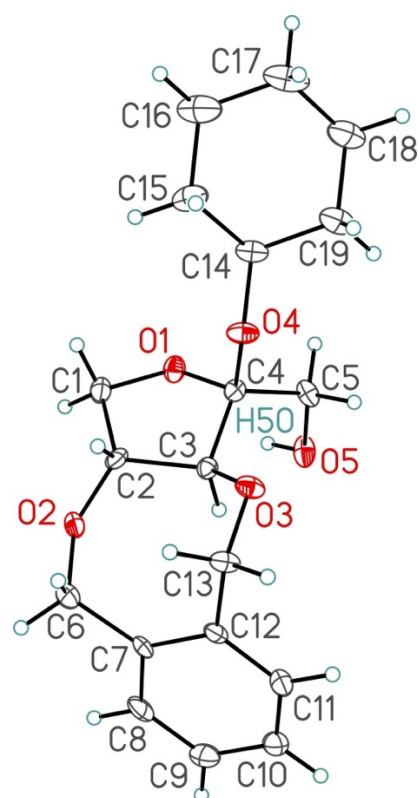



## Experimental details and data for new compounds

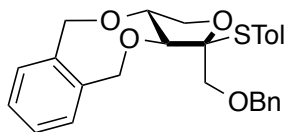

**Tolyl 1-O-benzyl-2-thio-3,4-O-xylylene- $\beta$ -D-threo-pent-2-ulofuranoside (7).** To a solution of **16** (159 mg, 0.267 mmol) in tetrahydrofuran (2.7 mL) was added 1M tetrabutylammonium fluoride (399  $\mu$ L, 0.399 mmol) at room temperature. After 4 h, the reaction mixture was added satd aq NaHCO<sub>3</sub> and then the solution was extracted with EtOAc. The organic layer was then washed with water and brine. The organic layer was dried with MgSO<sub>4</sub> and then filtered. The filtrate was concentrated and dried *in vacuo*. To a solution of the resulting residue in DMF (2.7 mL) was added benzyl bromide (54.8 mg, 38.0  $\mu$ L, 0.320 mmol) and 60% NaH (12.8 mg, 0.320 mmol) at room temperature. After 1 h, CH<sub>3</sub>OH was added. The mixture was concentrated and then diluted with CH<sub>2</sub>Cl<sub>2</sub>, and then washed with brine and water. The organic layers were dried with MgSO<sub>4</sub> and then filtered. The filtrate was concentrated under reduced pressure and then purified by column chromatography (8:1, hexane–EtOAc) to give **7** (105 mg, 88% over two steps) as a colorless oil.  $[\alpha]_D^{25} -18.7$  (*c* 0.7, CHCl<sub>3</sub>);  $R_f$  0.41 (4:1, hexane–EtOAc); <sup>1</sup>H NMR (CDCl<sub>3</sub>, 500 MHz)  $\delta_H$  7.48–7.38 (m, 4H, Ar), 7.38–7.34 (m, 2H, Ar), 7.31–7.24 (m, 3H, Ar), 7.14–7.10 (m, 2H, Ar), 7.10–7.06 (m, 2H, Ar), 5.04 (d, 1H,  $J_{gem} = 12.7$  Hz, ArCH<sub>2</sub>), 4.93 (d, 1H,  $J_{gem} = 12.7$  Hz, ArCH<sub>2</sub>), 4.85 (d, 1H,  $J_{gem} = 12.7$  Hz, ArCH<sub>2</sub>), 4.78 (d, 1H,  $J_{gem} = 12.7$  Hz, ArCH<sub>2</sub>), 4.58 (dd, 1H,  $J_{5a,4} = 7.7$  Hz,  $J_{gem} = 9.8$  Hz, H-5a), 4.54–4.49 (m, 2H, H-4, ArCH<sub>2</sub>), 4.48 (d, 1H,  $J_{3,4} = 4.8$  Hz, H-3), 4.33 (d, 1H,  $J_{gem} = 12.7$  Hz, ArCH<sub>2</sub>), 3.94 (dd, 1H,  $J_{5b,4} = 3.2$  Hz,  $J_{gem} = 9.8$

Hz, H-5b), 3.69 (d, 1H,  $J_{\text{gem}} = 11.3$  Hz, H-1a), 3.41 (d, 1H,  $J_{\text{gem}} = 11.3$  Hz, H-1b), 2.33 (s, 3H, ArCH<sub>3</sub>); <sup>13</sup>C NMR (CDCl<sub>3</sub>, 125 MHz)  $\delta_{\text{C}}$  138.6 (Ar), 138.1 (Ar), 136.4 (Ar), 136.3 (2C, Ar), 135.7 (Ar), 131.7 (Ar), 131.5 (Ar), 129.7 (Ar), 129.65 (Ar), 129.4 (2C, Ar), 128.3 (2C, Ar), 127.7 (2C, Ar), 127.5 (Ar), 126.8 (Ar), 98.2 (C-2), 83.8 (C-3), 81.4 (C-4), 73.3 (ArCH<sub>2</sub>), 70.9 (C-5), 70.3 (C-1), 69.5 (ArCH<sub>2</sub>), 68.8 (ArCH<sub>2</sub>), 21.2 (CH<sub>3</sub>); HRMS (ESI) calcd. for C<sub>27</sub>H<sub>28</sub>NaO<sub>4</sub>S [M+Na]<sup>+</sup> 471.1601; found 471.1598.

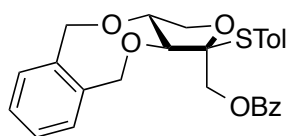

**Tollyl 1-O-benzoyl-2-thio-3,4-O-xylylene- $\beta$ -D-threo-pent-2-ulofuranoside (8).** To a solution of **16** (106 mg, 0.178 mmol) in tetrahydrofuran (1.8 mL) was added 1M tetrabutylammonium fluoride (266  $\mu$ L, 0.266 mmol) at room temperature. After 4 h, the reaction mixture was added to satd aq NaHCO<sub>3</sub> and then extracted with EtOAc. The organic layer was then washed with brine and water. The organic layer was dried with MgSO<sub>4</sub> and then filtered. The filtrate was concentrated and dried *in vacuo*. To a solution of the resulting residue in CH<sub>2</sub>Cl<sub>2</sub> (1.8 mL) was added Et<sub>3</sub>N (21.6 mg, 29.5  $\mu$ L, 0.213 mmol), benzoyl chloride (30.0 mg, 24.7  $\mu$ L, 0.213 mmol) and DMAP (2.2 mg, 0.0178 mmol) at room temperature. After 1 h, CH<sub>3</sub>OH was added and the mixture was concentrated and then diluted with CH<sub>2</sub>Cl<sub>2</sub>, washed with brine and water. The organic layers were dried with MgSO<sub>4</sub> and then filtered. The filtrate was concentrated under reduced pressure and then purified by column chromatography (8:1, hexane–EtOAc) to give **8** (73 mg, 89% over two steps) as a colorless oil.  $[\alpha]_{\text{D}}^{25} -78.1$  (*c* 0.5, CHCl<sub>3</sub>);  $R_f$  0.51 (4:1, hexane–EtOAc); <sup>1</sup>H NMR (CDCl<sub>3</sub>, 500 MHz)  $\delta_{\text{H}}$  7.84–7.80 (m, 2H, ArH),

7.56–7.50 (m, 1H, ArH), 7.43–7.34 (m, 8H, ArH), 7.14–7.09 (m, 2H, ArH), 5.06 (d, 1H,  $J_{\text{gem}} = 12.5$  Hz, ArCH<sub>2</sub>), 4.89 (d, 1H,  $J_{\text{gem}} = 12.5$  Hz, ArCH<sub>2</sub>), 4.86 (d, 1H,  $J_{\text{gem}} = 12.5$  Hz, ArCH<sub>2</sub>), 4.79 (d, 1H,  $J_{\text{gem}} = 12.5$  Hz, ArCH<sub>2</sub>), 4.61 (dd, 1H,  $J_{5a,4} = 7.9$ ,  $J_{\text{gem}} = 9.7$  Hz, H-5a), 4.56 (ddd, 1H,  $J_{4,3} = 4.6$  Hz,  $J_{4,5a} = 7.9$  Hz,  $J_{4,5b} = 3.0$  Hz, H-4), 4.43 (d, 1H,  $J_{\text{gem}} = 12.0$  Hz, H-1a), 4.38 (d, 1H,  $J_{\text{gem}} = 12.0$  Hz, H-1b), 4.35 (d, 1H,  $J_{3,4} = 4.6$  Hz, H-3), 3.92 (dd, 1H,  $J_{5b,4} = 3.0$  Hz,  $J_{\text{gem}} = 9.7$  Hz, H-5b), 2.33 (s, 3H, ArCH<sub>3</sub>); <sup>13</sup>C NMR (CDCl<sub>3</sub>, 125 MHz)  $\delta_{\text{C}}$  165.8 (C=O), 139.1 (Ar), 136.6 (Ar), 136.5 (2C, Ar), 135.2 (Ar), 133.0 (Ar), 131.8 (Ar), 131.4 (Ar), 129.9 (Ar), 129.8 (2C, Ar), 129.72 (2C, Ar), 129.67 (2C, Ar), 128.3 (2C, Ar), 126.0 (Ar), 96.5 (C-2), 84.1 (C-4), 81.6 (C-3), 71.1 (C-5), 69.5 (ArCH<sub>2</sub>), 69.1 (ArCH<sub>2</sub>), 64.5 (C-1), 21.1 (ArCH<sub>3</sub>); HRMS (ESI) calcd. for C<sub>27</sub>H<sub>26</sub>NaO<sub>5</sub>S [M+Na]<sup>+</sup> 485.1393; found 485.1397.

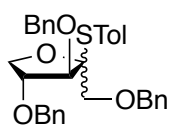

***p*-Tolyl 1,3,4-tri-*O*-benzyl-2-thio- $\alpha/\beta$ -D-threo-pent-2-ulofuranoside (9).** To a solution of **21** (116 mg, 0.173 mmol) in THF (1.7 mL) was added tetrabutylammonium fluoride (259  $\mu$ L, 0.259 mmol) at room temperature and the mixture was stirred for 4 h. After the completion of the reaction, the reaction mixture was added satd aq NH<sub>4</sub>Cl and extracted with EtOAc. The organic layer was then washed with water and brine. The organic layers were dried with MgSO<sub>4</sub> and then filtered. The filtrate was concentrated and dried *in vacuo*. To a solution of the resulting residue in DMF (1.7 mL) was added benzyl bromide (90.4 mg, 62.8  $\mu$ L, 0.207 mmol), followed by the addition of sodium hydride (21.1 mg, 0.207 mmol) at room temperature and the mixture was stirred for 2

h. After the completion of the reaction, CH<sub>3</sub>OH was added. The mixture was concentrated and then diluted with CH<sub>2</sub>Cl<sub>2</sub>, and then washed with brine and water. The organic layers were dried with MgSO<sub>4</sub> and then filtered. The filtrate was concentrated under reduced pressure and then purified by column chromatography (8:1, hexane–EtOAc) to give an inseparable  $\alpha/\beta$  mixture of **9** (80 mg, 88% over two steps,  $\alpha/\beta = 1:7$ ) as a colorless oil. R<sub>f</sub> 0.27 (8:1, hexane–EtOAc); Data for **9 $\alpha$** : <sup>1</sup>H NMR (CDCl<sub>3</sub>, 500 MHz)  $\delta_{\text{H}}$  7.43–7.25 (m, 17H, ArH), 7.09–7.06 (m, 2H, ArH), 4.76 (d, 1H,  $J_{\text{gem}} = 11.8$  Hz, ArCH<sub>2</sub>), 4.62 (d, 1H,  $J_{\text{gem}} = 11.8$  Hz, ArCH<sub>2</sub>), 4.53 (d, 1H,  $J_{\text{gem}} = 11.8$  Hz, ArCH<sub>2</sub>), 4.51 (d, 1H,  $J_{\text{gem}} = 11.8$  Hz, ArCH<sub>2</sub>), 4.46–4.40 (m, 2H, ArCH<sub>2</sub>), 4.24 (app dt, 1H,  $J_{4,3} = 4.6$  Hz,  $J_{4,5a} = J_{4,5b} = 7.4$  Hz, H-4), 4.14 (dd, 1H,  $J_{5a,4} = 7.4$  Hz,  $J_{\text{gem}} = 8.9$  Hz, H-5a), 4.09 (d, 1H,  $J_{3,4} = 4.6$  Hz, H-3), 3.95–3.91 (m, 1H, H-5b), 3.59 (d, 1H,  $J_{\text{gem}} = 10.0$  Hz, H-1a), 3.46 (d, 1H,  $J_{\text{gem}} = 10.0$  Hz, H-1b), 2.34 (s, 3H, ArCH<sub>3</sub>); <sup>13</sup>C NMR (CDCl<sub>3</sub>, 125 MHz)  $\delta_{\text{C}}$  96.6 (C-2), 88.5 (C-3), 83.3 (C-4), 73.4 (ArCH<sub>2</sub>), 72.5 (ArCH<sub>2</sub>), 70.1 (C-1), 69.4 (C-5), 21.4 (ArCH<sub>3</sub>); Data for **9 $\beta$** : <sup>1</sup>H NMR (CDCl<sub>3</sub>, 500 MHz)  $\delta_{\text{H}}$  7.43–7.25 (m, 17H, ArH), 7.10 (d, 2H,  $J = 8.2$  Hz, ArH), 4.80 (d, 1H,  $J_{\text{gem}} = 11.8$  Hz, ArCH<sub>2</sub>), 4.60 (d, 1H,  $J_{\text{gem}} = 11.8$  Hz, ArCH<sub>2</sub>), 4.55 (d, 1H,  $J_{\text{gem}} = 11.8$  Hz, ArCH<sub>2</sub>), 4.50 (d, 1H,  $J_{3,4} = 3.7$  Hz, H-3), 4.46 (d, 1H,  $J_{\text{gem}} = 11.8$  Hz, ArCH<sub>2</sub>), 4.43 (d, 1H,  $J_{\text{gem}} = 11.8$  Hz, ArCH<sub>2</sub>), 4.42 (dd, 1H,  $J_{5a,4} = 6.2$  Hz,  $J_{\text{gem}} = 9.5$  Hz, H-5a), 4.37 (d, 1H,  $J_{\text{gem}} = 11.8$  Hz, ArCH<sub>2</sub>), 4.37–4.33 (m, 1H, H-4), 3.94 (dd, 1H,  $J_{5b,4} = 3.0$  Hz,  $J_{\text{gem}} = 9.5$  Hz, H-5b), 3.66 (d, 1H,  $J_{\text{gem}} = 10.9$  Hz, H-1a), 3.45 (d, 1H,  $J_{\text{gem}} = 10.9$  Hz, H-1b), 2.35 (s, 3H, ArCH<sub>3</sub>); <sup>13</sup>C NMR (CDCl<sub>3</sub>, 125 MHz)  $\delta_{\text{C}}$  138.5 (Ar), 138.1 (Ar), 138.0 (Ar), 137.9 (Ar), 136.5 (2C, Ar), 129.3 (2C, Ar), 128.44 (2C, Ar), 128.37 (2C, Ar), 128.3 (2C, Ar), 128.0 (2C, Ar), 127.9 (2C, Ar), 127.8 (2C, Ar), 127.77 (Ar), 127.75 (Ar), 127.6 (Ar), 127.3

(Ar), 98.3 (C-2), 86.0 (C-3), 84.2 (C-4), 73.5 (ArCH<sub>2</sub>), 72.9 (ArCH<sub>2</sub>), 71.9 (C-1), 71.7 (ArCH<sub>2</sub>), 69.5 (C-5), 21.3 (ArCH<sub>3</sub>); HRMS (ESI) calcd. for C<sub>33</sub>H<sub>34</sub>NaO<sub>4</sub>S [M+Na]<sup>+</sup> 549.2070; found 549.2067.

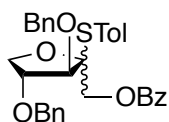

***p*-Tolyl 3,4-di-*O*-benzyl-1-*O*-benzoyl-2-thio- $\alpha/\beta$ -D-*threo*-pent-2-ulo-furanoside (**10**).**

To a solution of **21** (143 mg, 0.212 mmol) in THF (2.1 mL) was added tetrabutylammonium fluoride (318  $\mu$ L, 0.318 mmol) at room temperature and the mixture was stirred for 4 h. After the completion of the reaction, the reaction mixture was added satd aq NH<sub>4</sub>Cl and extracted with EtOAc. The organic layer was then washed with H<sub>2</sub>O and brine. The organic layers were dried with MgSO<sub>4</sub> and then filtered. The filtrate was concentrated and dried *in vacuo*. To a solution of the resulting residue in CH<sub>2</sub>Cl<sub>2</sub> (2.1 mL) was added triethylamine (25.7 mg, 35.2  $\mu$ L, 0.254 mmol), benzoyl chloride (35.8 mg, 29.6  $\mu$ L, 0.254 mmol) and DMAP (2.6 mg, 0.0212 mmol) at room temperature and the mixture was stirred for 1 h. After the completion of the reaction, excess benzoyl chloride was quenched by the addition of CH<sub>3</sub>OH and then concentrated under reduced pressure. The resulting residue was purified by column chromatography (8:1, hexane–EtOAc) to give an inseparable  $\alpha/\beta$  mixture of **10** (102 mg, 89% over two steps,  $\alpha/\beta$  = 1:7) as a colorless oil. R<sub>f</sub> 0.30 (8:1, hexane–EtOAc); Data for **10 $\alpha$** : <sup>1</sup>H NMR (CDCl<sub>3</sub>, 500 MHz)  $\delta$ <sub>H</sub> 8.05–8.01 (m, 2H, ArH), 7.54–7.50 (m, 2H, ArH), 7.49–7.43 (m, 2H, ArH), 7.41–7.24 (m, 11H, ArH), 7.14–7.10 (m, 2H, ArH), 4.73–4.56 (m, 3H, ArCH<sub>2</sub>), 4.53–4.37 (m, 3H, ArCH<sub>2</sub>, H-1a, H-1b), 4.27 (app dt, 1H,

$J_{4,3} = 4.7$  Hz,  $J_{4,5a} = J_{4,5b} = 7.2$  Hz, H-4), 4.21 (dd, 1H,  $J_{5b,4} = 7.2$  Hz,  $J_{gem} = 8.9$  Hz, H-5a), 4.19 (d, 1H,  $J_{3,4} = 4.7$  Hz, H-3), 4.04 (dd, 1H,  $J_{5b,4} = 7.2$  Hz,  $J_{gem} = 8.9$  Hz, H-5b), 2.34 (s, 3H, ArCH<sub>3</sub>); <sup>13</sup>C NMR (CDCl<sub>3</sub>, 125 MHz)  $\delta_C$  165.8 (C=O), 94.8 (C-2), 88.7 (C-3), 82.9 (C-4), 73.0 (ArCH<sub>2</sub>), 72.4 (ArCH<sub>2</sub>), 69.0 (C-5), 64.0 (C-1), 21.3 (ArCH<sub>3</sub>); Data for **10 $\beta$** : <sup>1</sup>H NMR (CDCl<sub>3</sub>, 500 MHz)  $\delta_H$  8.00–7.95 (m, 2H, ArH), 7.54–7.50 (m, 2H, ArH), 7.45 (d, 2H,  $J = 8.0$  Hz, ArH), 7.41–7.24 (m, 11H, ArH), 7.13 (d, 2H,  $J = 8.0$  Hz, ArH), 4.84 (d, 1H,  $J_{gem} = 12.2$  Hz, ArCH<sub>2</sub>), 4.67 (d, 1H,  $J_{gem} = 12.2$  Hz, ArCH<sub>2</sub>), 4.50 (s, 2H, ArCH<sub>2</sub>), 4.47 (dd, 1H,  $J_{5a,4} = 5.8$ ,  $J_{gem} = 9.8$  Hz, H-5a), 4.45–4.40 (m, 3H, H-1a, H-3, H-4), 4.38 (d, 1H,  $J_{gem} = 11.9$  Hz, H-1b), 3.99 (dd, 1H,  $J_{5b,4} = 2.8$  Hz,  $J_{gem} = 9.8$  Hz, H-5b), 2.34 (s, 3H, ArCH<sub>3</sub>); <sup>13</sup>C NMR (CDCl<sub>3</sub>, 125 MHz)  $\delta_C$  165.9 (C=O), 139.0 (Ar), 137.7 (Ar), 137.7 (Ar), 137.4 (Ar), 136.6 (2C, Ar), 133.0 (Ar), 130.6 (Ar), 129.8 (2C, Ar), 129.6 (2C, Ar), 128.9 (Ar), 128.5 (2C, Ar), 128.4 (2C, Ar), 128.3 (2C, Ar), 128.0 (2C, Ar), 127.92 (Ar), 127.88 (Ar), 127.78 (Ar), 96.5 (C-2), 85.9 (C-3), 84.1 (C-4), 73.1 (ArCH<sub>2</sub>), 71.9 (ArCH<sub>2</sub>), 69.7 (C-5), 65.6 (C-1), 21.3 (ArCH<sub>3</sub>); HRMS (ESI) calcd. for C<sub>33</sub>H<sub>32</sub>NaO<sub>5</sub>S [M+Na]<sup>+</sup> 563.1863; found 563.1870.

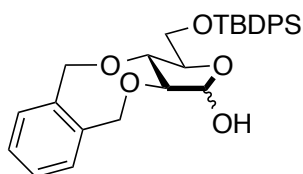

**5-O-*t*-butyldiphenylsilyl-2,3-O-xylylidene- $\alpha/\beta$ -D-arabinose (12).** To a solution of the **11**<sup>1</sup> (10.0 g, 17.6 mmol) in CH<sub>3</sub>OH (88.0 mL) was added sodium methoxide (70.4 mg, 1.76 mmol) at room temperature. After stirring for 3.5 h, sodium methoxide was neutralized by the addition of Amberlite IR-120 H<sup>+</sup> resin. The mixture was then filtered and the filtrate was concentrated under reduced pressure and dried *in vacuo*. To a

solution of the resulting residue in pyridine (52 mL) was added TBDPSCl (5.4 g, 5.1 mL, 19.4 mmol) and Et<sub>3</sub>N (5.3 g, 7.3 mL, 52.8 mmol) at 0 °C. After stirring for 16 h at room temperature, the CH<sub>3</sub>OH was added and the solution was co-evaporated with toluene. The crude residue was diluted with CH<sub>2</sub>Cl<sub>2</sub> and washed with 1N HCl, water, satd aq NaHCO<sub>3</sub> and brine. The organic layers were dried with MgSO<sub>4</sub> and filtered. The filtrate was then concentrated under reduced pressure and dried *in vacuo*. The residue was then dissolved in DMF (88 mL), followed by addition of 60% NaH (1.76 g, 44.0 mol) and  $\alpha,\alpha'$ -dibromo-*o*-xylylene (5.1 g, 19.4 mmol) at 0 °C. After stirring for 1.5 h at room temperature, satd aq NH<sub>4</sub>Cl was added. Dilution of the mixture with CH<sub>2</sub>Cl<sub>2</sub> provided a solution that was washed with water and brine. The organic layer was dried with MgSO<sub>4</sub>, filtered and the filtrate was concentrated. The obtained residue was dissolved in mixture of acetone and water (80.0 mL, 9:1), followed by addition of *N*-bromosuccinimide (4.7 g, 26.4 mmol) at room temperature. After stirring for 30 min at room temperature, the mixture was concentrated. The crude residue was then diluted with CH<sub>2</sub>Cl<sub>2</sub> and washed with water and brine. The organic layer was then dried over MgSO<sub>4</sub> and concentrated. The resulting residue was purified by column chromatography (4:1, hexane–EtOAc) to give an inseparable  $\alpha/\beta$  mixture of **12** (4.0 g, 46% over four steps,  $\alpha:\beta = 1.6:1$ ) as a white foam. *R<sub>f</sub>* 0.27 (4:1, hexane–EtOAc); Data for **12a**: <sup>1</sup>H NMR (CDCl<sub>3</sub>, 500 MHz)  $\delta_{\text{H}}$  7.68–7.62 (m, 4H, ArH), 7.55–7.52 (m, 1H, ArH), 7.45–7.34 (m, 9H, ArH), 5.36 (d, 1H,  $J_{1,2} = 2.5$  Hz, H-1), 4.94 (d, 1H,  $J_{\text{gem}} = 12.5$  Hz, ArCH<sub>2</sub>), 4.71 (d, 1H,  $J_{\text{gem}} = 12.5$  Hz, ArCH<sub>2</sub>), 4.21 (ddd, 1H,  $J_{4,3} = 8.3$  Hz,  $J_{4,5a} = 2.4$  Hz,  $J_{4,5b} = 3.9$  Hz, H-4), 4.16 (dd, 1H,  $J_{3,2} = 5.2$  Hz,  $J_{3,4} = 8.3$  Hz, H-3), 4.00 (dd, 1H,  $J_{2,1} = 2.5$  Hz,  $J_{2,3} = 5.2$  Hz, H-2), 3.87 (dd, 1H,  $J_{5a,4} = 2.4$  Hz,  $J_{\text{gem}} = 11.5$  Hz, H-

5a), 3.75 (dd, 1H,  $J_{5b,4} = 3.9$  Hz,  $J_{gem} = 11.5$  Hz, H-5b), 2.80 (br s, 1H, OH), 1.01 (s, 9H, C(CH<sub>3</sub>)<sub>3</sub>); <sup>13</sup>C NMR (CDCl<sub>3</sub>, 125 MHz)  $\delta_c$  135.8 (Ar), 135.7 (2C, Ar), 135.6 (Ar), 131.77 (Ar), 131.74 (Ar), 131.45 (Ar), 131.44 (Ar), 129.71 (2C, Ar), 129.66 (Ar), 129.64 (Ar), 127.89 (Ar), 127.87 (Ar), 127.70 (2C, Ar), 127.67 (2C, Ar), 102.4 (C-1), 88.3 (C-2), 81.7 (C-4), 80.8 (C-3), 69.9 (ArCH<sub>2</sub>), 68.5 (ArCH<sub>2</sub>), 63.1 (C-5), 26.8 ((CH<sub>3</sub>)<sub>3</sub>C) 19.3 ((CH<sub>3</sub>)<sub>3</sub>C); Data for **12 $\beta$** : <sup>1</sup>H NMR (CDCl<sub>3</sub>, 500 MHz)  $\delta_H$  7.68–7.62 (m, 4H, ArH), 7.45–7.34 (m, 10H, ArH), 5.28 (dd, 1H,  $J_{1,2} = 5.3$  Hz,  $J_{1,OH} = 7.8$  Hz, H-1), 4.99 (d, 1H,  $J_{gem} = 12.5$  Hz, ArCH<sub>2</sub>), 4.95 (d, 1H,  $J_{gem} = 12.5$  Hz, ArCH<sub>2</sub>), 4.90 (d, 1H,  $J_{gem} = 12.5$  Hz, ArCH<sub>2</sub>), 4.71 (d, 1H,  $J_{gem} = 12.5$  Hz, ArCH<sub>2</sub>), 4.26 (app t, 1H,  $J_{3,2} = J_{3,4} = 5.3$  Hz, H-3), 4.16 (app t, 1H,  $J_{2,1} = J_{2,3} = 5.3$  Hz, H-2), 4.13 (d, 1H,  $J_{OH,1} = 7.8$  Hz, OH), 4.04 (app dt, 1H,  $J_{4,3} = 5.3$  Hz,  $J_{4,5a} = J_{4,5b} = 3.4$  Hz, H-4), 3.79 (dd, 1H,  $J_{5a,4} = 3.4$  Hz,  $J_{gem} = 11.2$  Hz, H-5a), 3.61 (dd, 1H,  $J_{5b,4} = 3.4$  Hz,  $J_{gem} = 11.2$  Hz, H-5b), 1.00 (s, 9H, (CH<sub>3</sub>)<sub>3</sub>C); <sup>13</sup>C NMR (CDCl<sub>3</sub>, 125 MHz)  $\delta_c$  136.3 (Ar), 136.2 (Ar), 136.1 (Ar), 135.9 (Ar), 133.5 (Ar), 133.4 (Ar), 132.5 (Ar), 132.3 (Ar), 130.0 (Ar), 129.9 (Ar), 97.6 (C-1), 83.7 (C-4), 83.6 (C-2), 80.0 (C-3), 69.4 (ArCH<sub>2</sub>), 68.7 (ArCH<sub>2</sub>), 64.7 (C-5), 26.8 ((CH<sub>3</sub>)<sub>3</sub>C), 19.2 ((CH<sub>3</sub>)<sub>3</sub>C); HRMS (ESI) calcd. for C<sub>29</sub>H<sub>34</sub>NaO<sub>5</sub>Si [M+Na]<sup>+</sup> 513.2068; found 513.2061.

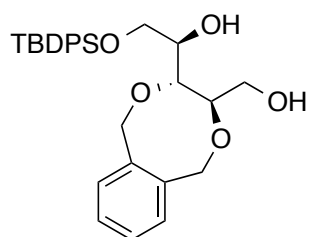

**5-O-*t*-butyldiphenylsilyl-2,3-O-xylylidene-D-arabinitol (13).** To a solution of **12** (250 mg, 0.508 mmol) in CH<sub>3</sub>OH (5 mL) was added sodium borohydride (19.2 mg,



0.508 mmol) at room temperature. After stirring for 2 h, the reaction mixture was added to 1N HCl (10 mL) and then extracted with EtOAc. The organic layer was then washed with water and brine. The organic layer was dried with MgSO<sub>4</sub> and then filtered. The filtrate was concentrated and the resulting residue was purified by column chromatography (1:1, hexane–EtOAc) to give **13** (175.1 mg, 70%) as a white foam.  $[\alpha]_D^{25} -28.7$  (*c* 1.1, CHCl<sub>3</sub>); *R<sub>f</sub>* 0.35 (1:1, hexane–EtOAc); <sup>1</sup>H NMR (CDCl<sub>3</sub>, 700 MHz)  $\delta_H$  7.75–7.71 (m, 2H, ArH), 7.70–7.68 (m, 2H, ArH), 7.51–7.40 (m, 6H, ArH), 7.24–7.21 (m, 2H, ArH), 7.11–7.07 (m, 1H, ArH), 7.06–7.02 (m, 1H, ArH), 5.10 (d, 1H, *J*<sub>gem</sub> = 14.0 Hz, ArCH<sub>2</sub>), 5.03 (d, 1H, *J*<sub>gem</sub> = 14.0 Hz, ArCH<sub>2</sub>), 5.00 (d, 1H, *J*<sub>gem</sub> = 14.0 Hz, ArCH<sub>2</sub>), 4.82 (d, 1H, *J*<sub>gem</sub> = 14.0 Hz, ArCH<sub>2</sub>), 3.94 (dd, 1H, *J*<sub>5a,4</sub> = 4.2 Hz, *J*<sub>gem</sub> = 10.5 Hz, H-5a), 3.91 (dd, 1H, *J*<sub>5b,4</sub> = 5.6 Hz, *J*<sub>gem</sub> = 10.5 Hz, H-5-b), 3.91–3.82 (m, 1H, H-1a), 3.75–3.72 (m, 2H, H-2, H-4), 3.68–3.63 (m, 1H, H-1b), 3.26 (dd, 1H, *J* = 9.1, 7.0 Hz, H-3), 2.96 (d, 1H, *J* = 5.6 Hz, OH), 2.84 (br s, 1H, OH), 1.14 (s, 9H, (CH<sub>3</sub>)<sub>3</sub>C); <sup>13</sup>C NMR (CDCl<sub>3</sub>, 175 MHz)  $\delta_C$  136.95 (Ar), 136.92 (Ar), 135.7 (2C, Ar), 135.65 (2C, Ar), 133.03 (Ar), 133.02 (Ar), 130.05 (Ar), 130.03 (Ar), 128.4 (Ar), 128.3 (Ar), 127.98 (2C, Ar), 127.96 (2C, Ar), 127.5 (2C, Ar), 84.2 (C-2), 82.0 (C-3), 75.1 (ArCH<sub>2</sub>), 74.9 (ArCH<sub>2</sub>), 72.4 (C-4), 64.5 (C-5), 63.7 (C-1), 26.9 ((CH<sub>3</sub>)<sub>3</sub>C) 19.2 ((CH<sub>3</sub>)<sub>3</sub>C); HRMS (ESI) calcd. for C<sub>29</sub>H<sub>36</sub>NaO<sub>5</sub>Si [M+Na]<sup>+</sup> 515.2224; found 515.2217.

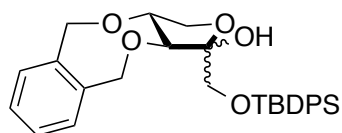

**1-O-tert-butylidiphenylsilyl-3,4-O-xylylene- $\alpha/\beta$ -D-threo-pent-2-ulofuranose (14).**

To a solution of **13** (75.1 mg, 0.152 mmol) in CH<sub>2</sub>Cl<sub>2</sub> (4 mL) was added bis(tri-*n*-

butyltin) oxide (116  $\mu\text{L}$ , 136 mg, 0.229 mmol) at 0  $^{\circ}\text{C}$ , followed by bromine (11.7  $\mu\text{L}$ , 36.5 mg, 0.229 mmol) dropwise. After stirring for 2.5 h, the reaction mixture was concentrated. The resulting residue was purified by column chromatography ( $\text{CH}_2\text{Cl}_2$ , then 4:1, hexane–EtOAc) to give **14** (40 mg, 50%,  $\alpha/\beta = 1:10$ ) as a colorless oil.  $R_f$  0.32 (2:1, hexane–EtOAc); Data for **14 $\beta$** :  $^1\text{H}$  NMR ( $\text{CDCl}_3$ , 500 MHz)  $\delta_{\text{H}}$  7.67–7.62 (m, 4H, ArH), 7.45–7.35 (m, 10H, ArH), 5.05 (d, 1H,  $J_{\text{gem}} = 12.4$  Hz, ArCH<sub>2</sub>), 4.88 (d, 1H,  $J_{\text{gem}} = 12.9$  Hz, ArCH<sub>2</sub>), 4.82 (d, 1H,  $J_{\text{gem}} = 12.4$  Hz, ArCH<sub>2</sub>), 4.78 (d, 1H,  $J_{\text{gem}} = 12.9$  Hz, ArCH<sub>2</sub>), 4.42 (app dt, 1H,  $J_{4,3} = J_{4,5b} = 4.6$  Hz,  $J_{4,5a} = 7.8$  Hz, H-4), 4.35 (dd, 1H,  $J_{5a,4} = 7.8$  Hz,  $J_{\text{gem}} = 9.5$  Hz, H5-a), 4.05 (d, 1H,  $J_{3,4} = 4.6$  Hz, H-3), 3.80 (dd, 1H,  $J_{5b,4} = 4.6$  Hz,  $J_{\text{gem}} = 9.5$  Hz, H-5b), 3.69 (d, 1H,  $J_{\text{gem}} = 10.4$  Hz, H-1a), 3.67 (s, 1H, OH), 3.61 (d, 1H,  $J_{\text{gem}} = 10.4$  Hz, H-1b), 1.01 (s, 9H,  $(\text{CH}_3)_3\text{C}$ );  $^{13}\text{C}$  NMR ( $\text{CDCl}_3$ , 125 MHz)  $\delta_{\text{C}}$  136.7 (Ar), 135.9 (Ar), 135.81 (2C, Ar), 135.79 (2C, Ar), 135.7 (Ar), 133.22 (Ar), 133.18 (Ar), 131.8 (Ar), 131.7 (Ar), 130.0 (Ar), 129.9 (2C, Ar), 129.8 (Ar), 127.9 (3C, Ar), 104.0 (C-2), 81.7 (C-3), 81.0 (C-4), 70.3 (C-5), 69.2 (ArCH<sub>2</sub>), 69.1 (ArCH<sub>2</sub>), 65.9 (C-1), 26.7 ( $(\text{CH}_3)_3\text{C}$ ), 19.2 ( $(\text{CH}_3)_3\text{C}$ ); HRMS (ESI) calcd. for  $\text{C}_{29}\text{H}_{34}\text{NaO}_5\text{Si}$  [ $\text{M}+\text{Na}$ ]<sup>+</sup> 513.2068; found 513.2068.

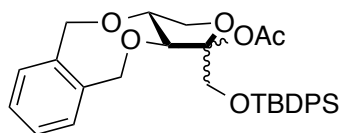

**2-O-acetyl-1-O-tert-butylidiphenyl-3,4-O-xylylene- $\alpha/\beta$ -D-threo-pent-2-**

**ulofuranoside (15).** To a solution of **14** (4.34 g, 8.85 mmol) in tetrahydrofuran (88.5 mL) was added acetic anhydride (1.0 mL, 1.08 g, 10.6 mmol) at room temperature. The mixture was then cooled to  $-78$   $^{\circ}\text{C}$  and *n*-butyllithium (6.63 mL, 10.6 mmol) was added

dropwise. After stirring for 2 h, the reaction mixture was added satd aq NaHCO<sub>3</sub> and then extracted with EtOAc. The organic layer was then washed with brine and water. The organic layer was dried with MgSO<sub>4</sub> and then filtered. The filtrate was concentrated and the resulting residue was purified by column chromatography (8:1, hexane–EtOAc) to give **15** (4.50 g, 96%,  $\alpha/\beta = 1:10$ ) as a yellow oil. *R<sub>f</sub>* 0.45 (4:1, hexane–EtOAc); Data for **15 $\beta$** : <sup>1</sup>H NMR (CDCl<sub>3</sub>, 500 MHz)  $\delta_{\text{H}}$  7.63–7.60 (m, 2H, ArH), 7.52–7.49 (m, 2H, ArH), 7.45–7.34 (m, 10H, ArH), 5.13 (d, 1H,  $J_{\text{gem}} = 12.4$  Hz, ArCH<sub>2</sub>), 4.94 (app dt, 1H,  $J_{4,3} = J_{4,5b} = 5.2$  Hz,  $J_{4,5a} = 8.3$  Hz, H-4), 4.87 (d, 1H,  $J_{\text{gem}} = 12.9$  Hz, ArCH<sub>2</sub>), 4.80 (d, 1H,  $J_{\text{gem}} = 12.9$  Hz, ArCH<sub>2</sub>), 4.78 (d, 1H,  $J_{\text{gem}} = 12.4$  Hz, ArCH<sub>2</sub>), 4.59 (app t, 1H,  $J_{5a,4} = J_{\text{gem}} = 8.3$  Hz, H-5a), 4.57 (d, 1H,  $J_{3,4} = 5.2$  Hz, H-3), 3.89 (dd, 1H,  $J_{5b,4} = 5.2$  Hz,  $J_{\text{gem}} = 8.3$  Hz, H-5b), 3.75 (d, 1H,  $J_{\text{gem}} = 10.6$  Hz, H-1a), 3.60 (d, 1H,  $J_{\text{gem}} = 10.6$  Hz, H-1b), 2.01 (s, 3H, CH<sub>3</sub>CO), 0.89 (s, 9H, (CH<sub>3</sub>)<sub>3</sub>C); <sup>13</sup>C NMR (CDCl<sub>3</sub>, 125 MHz)  $\delta_{\text{C}}$  169.1 (C=O), 137.7 (Ar), 135.5 (2C, Ar), 134.8 (Ar), 133.0 (Ar), 132.96 (Ar), 131.7 (Ar), 131.2 (Ar), 129.7 (Ar), 129.64 (Ar), 129.62 (Ar), 129.5 (Ar), 127.66 (2C, Ar), 127.64 (2C, Ar), 127.61 (Ar), 127.58 (Ar), 109.4 (C-2), 82.7 (C-4), 80.5 (C-3), 73.9 (C-5), 70.1 (ArCH<sub>2</sub>), 68.1 (ArCH<sub>2</sub>), 64.2 (C-1), 26.5 ((CH<sub>3</sub>)<sub>3</sub>C), 21.8 (CH<sub>3</sub>CO), 19.2 ((CH<sub>3</sub>)<sub>3</sub>C); HRMS (ESI) calcd. for C<sub>31</sub>H<sub>40</sub>NO<sub>6</sub>Si [M+NH<sub>4</sub>]<sup>+</sup> 550.2619; found 550.2616.

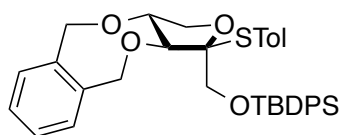

**Tolyl**                      **1-*O*-*tert*-butyldiphenyl-2-thio-3,4-*O*-xylylene- $\beta$ -D-*threo*-pent-2-ulofuranoside (16).** To a solution of **15** (132 mg, 0.248 mmol) and thiocresol (36.9 mg, 0.297 mmol) in CH<sub>2</sub>Cl<sub>2</sub> (2.5 mL) was added boron trifluoride diethyl etherate (39.8  $\mu$ L,

0.322 mmol) at 0 °C. After stirring for 2 h, the reaction mixture was added to satd aq NaHCO<sub>3</sub> and then extracted with EtOAc. The organic layer was then washed with brine and water. The organic layer was dried with MgSO<sub>4</sub> and then filtered. The filtrate was concentrated and the resulting residue was purified by column chromatography (8:1, hexane–EtOAc) to give **16** (106 mg, 72%) as a yellow oil.  $[\alpha]_D^{25} -29.6$  (*c* 2.2, CHCl<sub>3</sub>); *R*<sub>f</sub> 0.57 (4:1, hexane–EtOAc); <sup>1</sup>H NMR (CDCl<sub>3</sub>, 500 MHz)  $\delta_H$  7.53–7.50 (m, 2H, ArH), 7.47–7.44 (m, 2H, ArH), 7.42–7.37 (m, 5H, ArH), 7.36–7.31 (m, 3H, ArH), 7.25–7.21 (m, 2H, ArH), 7.20 (d, 2H, *J* = 7.8 Hz, ArH), 6.95 (d, 2H, *J* = 7.8 Hz, ArH), 5.07 (d, 1H, *J*<sub>gem</sub> = 12.7 Hz, ArCH<sub>2</sub>), 4.89 (d, 1H, *J*<sub>gem</sub> = 12.7 Hz, ArCH<sub>2</sub>), 4.83 (d, 1H, *J*<sub>gem</sub> = 12.7 Hz, ArCH<sub>2</sub>), 4.81 (d, 1H, *J*<sub>gem</sub> = 12.7 Hz, ArCH<sub>2</sub>), 4.63–4.61 (m, 1H, H-3), 4.60–4.52 (m, 2H, H-4, H-5a), 3.93–3.88 (m, 1H, H-5b), 3.85 (d, 1H, *J*<sub>gem</sub> = 11.4 Hz, H-1a), 3.61 (d, 1H, *J*<sub>gem</sub> = 11.4 Hz, H-1b), 2.28 (s, 3H, ArCH<sub>3</sub>), 0.88 (s, 9H, (CH<sub>3</sub>)<sub>3</sub>C); <sup>13</sup>C NMR (CDCl<sub>3</sub>, 125 MHz)  $\delta_C$  138.2 (Ar), 136.8 (Ar), 136.0 (2C, Ar), 135.6 (2C, Ar), 135.5 (2C, Ar), 134.8 (Ar), 133.5 (Ar), 133.1 (Ar), 131.7 (Ar), 131.4 (Ar), 129.8 (Ar), 129.7 (Ar), 129.5 (Ar), 129.3 (Ar), 129.2 (2C, Ar), 127.8 (Ar), 127.6 (2C, Ar), 127.5 (2C, Ar), 98.7 (C-2), 82.7 (C-4), 81.9 (C-3), 71.0 (C-5), 69.4 (ArCH<sub>2</sub>), 69.1 (ArCH<sub>2</sub>), 64.5 (C-1), 26.6 ((CH<sub>3</sub>)<sub>3</sub>C), 21.1 (ArCH<sub>3</sub>), 19.3 ((CH<sub>3</sub>)<sub>3</sub>C); HRMS (ESI) calcd. for C<sub>36</sub>H<sub>40</sub>NaO<sub>4</sub>SSi [M+Na]<sup>+</sup> 619.2309; found 619.2298.

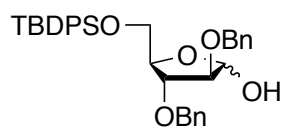

**2,3-di-O-benzyl-5-O-tert-butylidiphenylsilyl- $\alpha/\beta$ -D-arabinofuranose (17).** To a solution of **11**<sup>1</sup> (4 g, 7.15 mmol) in CH<sub>3</sub>OH (35.7 mL) was added sodium methoxide

(38.6 mg, 0.715 mmol) at room temperature. The reaction mixture was stirred for 3.5 h at room temperature, then neutralized by addition of Amberlite IR-120 H<sup>+</sup> resin, filtered, and filtrate was concentrated. The resulting crude residue was dissolved in pyridine (27 mL), followed by the addition of TBDPSCl (2.03 mL, 7.85 mmol) and triethylamine (2.98 mL, 21.4 mmol). After stirring for 16 h at room temperature, CH<sub>3</sub>OH was added, followed by co-evaporation with toluene. The crude residue was diluted with CH<sub>2</sub>Cl<sub>2</sub> and washed with 1N HCl, H<sub>2</sub>O, satd aq NaHCO<sub>3</sub> and brine. The organic layer was dried with MgSO<sub>4</sub> and then filtered, and the filtrate was concentrated and dried *in vacuo*. The resulting crude residue was then dissolved in DMF (27 mL), followed by the addition of benzyl bromide (2.68 g, 1.87 mL, 15.7 mmol) and 60% NaH (713 mg, 17.9 mmol). The reaction mixture was stirred for 1.5 h, satd aq NH<sub>4</sub>Cl was added, and the solution was diluted with CH<sub>2</sub>Cl<sub>2</sub>. The organic layer was then washed with H<sub>2</sub>O, satd aq NaHCO<sub>3</sub> and brine. The organic layer was subsequently dried with MgSO<sub>4</sub> and then filtered. The filtrate was then concentrated and dried *in vacuo*. The resulting crude residue was then dissolved in the mixture of acetone and H<sub>2</sub>O (27 mL, 9:1), followed by the addition of *N*-bromosuccinimide (2.54 g, 14.3 mmol). The reaction mixture was stirred for 30 min at room temperature, then evaporated. The resulting residue was then diluted with CH<sub>2</sub>Cl<sub>2</sub>, and washed with satd aq NaHCO<sub>3</sub>, H<sub>2</sub>O, and brine. The organic layer was dried with MgSO<sub>4</sub> and then filtered. The filtrate was concentrated and the resulting residue was purified by column chromatography (4:1, hexane–EtOAc) to give an  $\alpha/\beta$  mixture of **17** (2.72 g, 67% over four steps,  $\alpha/\beta = 2:1$ ) as a colorless oil. *R*<sub>f</sub> 0.29 (4:1, hexane–EtOAc); Data for **17** $\alpha$ : <sup>1</sup>H NMR (CDCl<sub>3</sub>, 700 MHz)  $\delta$ <sub>H</sub> 7.71–7.65 (m, 4H, ArH), 7.47–7.26 (m, 16H, ArH), 5.37 (dd, 1H, *J*<sub>1,2</sub> = 1.4 Hz, *J*<sub>1,OH</sub> = 8.8 Hz, H-1), 4.62

(d, 1H,  $J_{\text{gem}} = 12.1$  Hz, ArCH<sub>2</sub>), 4.57 (d, 1H,  $J_{\text{gem}} = 12.1$  Hz, ArCH<sub>2</sub>), 4.53 (d, 1H,  $J_{\text{gem}} = 12.1$  Hz, ArCH<sub>2</sub>), 4.49 (d, 1H,  $J_{\text{gem}} = 12.1$  Hz, ArCH<sub>2</sub>), 4.45 (ddd, 1H,  $J_{4,3} = 2.8$  Hz,  $J_{4,5a} = 5.2$  Hz,  $J_{4,5b} = 7.7$  Hz, H-4), 4.14–4.12 (m, 1H, H-3), 4.01 (d, 1H,  $J_{2,1} = 1.4$  Hz, H-2), 3.84 (dd, 1H,  $J_{5a,4} = 5.2$  Hz,  $J_{\text{gem}} = 10.5$  Hz, H-5a), 3.75 (dd, 1H,  $J_{5b,4} = 7.7$  Hz,  $J_{\text{gem}} = 10.5$  Hz, H-5b), 3.34 (d, 1H,  $J_{\text{OH},1} = 8.8$  Hz, OH), 1.09 (s, 9H, (CH<sub>3</sub>)<sub>3</sub>C); <sup>13</sup>C NMR (CDCl<sub>3</sub>, 175 MHz)  $\delta_{\text{C}}$  135.7 (Ar), 135.63 (Ar), 135.61 (3C, Ar), 129.8 (Ar), 129.7 (Ar), 128.55 (2C, Ar), 128.48 (2C, Ar), 128.1 (Ar), 128.0 (Ar), 127.9 (Ar), 127.83 (Ar), 127.81 (Ar), 127.75 (2C, Ar), 127.73 (2C, Ar), 127.71 (2C, Ar), 127.67 (2C, Ar), 101.2 (C-1), 86.1 (C-2), 84.0 (C-4), 82.3 (C-3), 72.0 (ArCH<sub>2</sub>), 71.7 (ArCH<sub>2</sub>), 64.0 (C-5), 26.90 ((CH<sub>3</sub>)<sub>3</sub>C) 19.29 ((CH<sub>3</sub>)<sub>3</sub>C); Data for **17 $\beta$** : <sup>1</sup>H NMR (CDCl<sub>3</sub>, 700 MHz)  $\delta_{\text{H}}$  7.71–7.65 (m, 4H, ArH), 7.47–7.26 (m, 16H, ArH), 5.40 (dd, 1H,  $J_{1,2} = 4.3$  Hz,  $J_{1,\text{OH}} = 10.0$  Hz, H-1), 4.67 (d, 1H,  $J_{\text{gem}} = 12.1$  Hz, ArCH<sub>2</sub>), 4.58 (d, 1H,  $J_{\text{gem}} = 12.1$  Hz, ArCH<sub>2</sub>), 4.57 (d, 1H,  $J_{\text{gem}} = 12.1$  Hz, ArCH<sub>2</sub>), 4.56 (d, 1H,  $J_{\text{gem}} = 12.1$  Hz, ArCH<sub>2</sub>), 4.25 (app t, 1H,  $J_{3,2} = J_{3,4} = 4.3$  Hz, H-3), 4.08 (app dt, 1H,  $J_{4,3} = 4.3$  Hz,  $J_{4,5a} = J_{4,5b} = 5.0$  Hz, H-4), 4.04 (app t, 1H,  $J_{2,1} = J_{2,3} = 4.3$  Hz, H-2), 3.80 (dd, 1H,  $J_{5a,4} = 5.0$  Hz,  $J_{\text{gem}} = 11.2$  Hz, H-5a), 3.78 (d, 1H,  $J_{\text{OH},1} = 10.0$  Hz, OH), 3.75–3.72 (m, 1H, H-5b), 1.10 (s, 9H, (CH<sub>3</sub>)<sub>3</sub>C); <sup>13</sup>C NMR (CDCl<sub>3</sub>, 175 MHz)  $\delta_{\text{C}}$  137.8 (Ar), 137.43 (2C, Ar), 137.35 (2C, Ar), 137.33 (Ar), 133.4 (2C, Ar), 133.3 (2C, Ar), 132.9 (Ar), 132.8 (Ar), 129.94 (2C, Ar), 129.86 (2C, Ar), 128.5 (2C, Ar), 128.4 (2C, Ar), 127.8 (2C, Ar), 127.7 (2C, Ar), 96.4 (C-1), 83.7 (C-2), 82.1 (C-4), 81.9 (C-3), 72.3 (ArCH<sub>2</sub>), 71.9 (ArCH<sub>2</sub>), 64.7 (C-5), 26.91 ((CH<sub>3</sub>)<sub>3</sub>C), 19.25 ((CH<sub>3</sub>)<sub>3</sub>C); HRMS (ESI) calcd. For C<sub>35</sub>H<sub>40</sub>NaO<sub>5</sub>Si [M+Na]<sup>+</sup> 591.2537; found 591.2539.

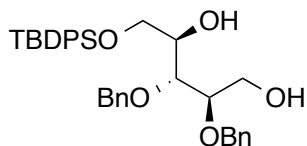

**5-*O*-*t*-butyldiphenylsilyl-2,3-di-*O*-benzyl-D-arabinitol (18).** To a solution of **17** (2.72 g, 4.78 mmol) in CH<sub>3</sub>OH (35 mL) was added sodium borohydride (198 mg, 5.26 mmol) at room temperature. After stirring for 2 h at room temperature, 1N HCl was added to the reaction mixture and then the solution was extracted with EtOAc. The organic layer was then washed with satd aq NaHCO<sub>3</sub>, H<sub>2</sub>O and brine. The organic layer was dried with MgSO<sub>4</sub> and then filtered. The filtrate was concentrated and the resulting residue was purified by column chromatography (2:1, hexane–EtOAc) to give **18** (2.12 g, 78%) as a colorless oil.  $[\alpha]_D^{25} -6.2$  (*c* 2.7, CHCl<sub>3</sub>); *R<sub>f</sub>* 0.37 (1:1, hexane–EtOAc); <sup>1</sup>H NMR (CDCl<sub>3</sub>, 500 MHz)  $\delta_H$  7.70–7.64 (m, 4H, ArH), 7.48–7.43 (m, 2H, ArH), 7.42–7.36 (m, 4H, ArH), 7.34–7.25 (m, 8H, ArH), 7.22–7.18 (m, 2H, ArH), 4.65 (d, 1H, *J*<sub>gem</sub> = 11.6, ArCH<sub>2</sub>), 4.62 (d, 1H, *J*<sub>gem</sub> = 11.6 Hz, ArCH<sub>2</sub>), 4.61 (d, 1H, *J*<sub>gem</sub> = 11.3 Hz, ArCH<sub>2</sub>), 4.57 (d, 1H, *J*<sub>gem</sub> = 11.3 Hz, ArCH<sub>2</sub>), 3.98–3.92 (m, 1H, H-4), 3.88–3.77 (m, 6H, H-1a, H-1b, H-2, H-3, H-5a, H-5b), 3.06 (d, 1H, *J* = 5.3 Hz, OH), 2.30 (br s, 1H, OH) 1.10 (s, 9H, (CH<sub>3</sub>)<sub>3</sub>C); <sup>13</sup>C NMR (CDCl<sub>3</sub>, 125 MHz)  $\delta_C$  138.1 (Ar), 137.9 (Ar), 135.84 (2C, Ar), 135.78 (2C, Ar), 133.3 (Ar), 133.2 (Ar), 130.06 (2C, Ar), 130.05 (2C, Ar), 128.7 (2C, Ar), 128.6 (2C, Ar), 128.4 (2C, Ar), 128.3 (2C, Ar), 128.10 (Ar), 128.07 (Ar), 128.00 (2C, Ar), 79.6 (C-2), 78.6 (C-3), 73.7 (ArCH<sub>2</sub>), 72.8 (ArCH<sub>2</sub>), 71.6 (C-4), 64.9 (C-5), 61.7 (C-1), 26.9 ((CH<sub>3</sub>)<sub>3</sub>C) 19.3 ((CH<sub>3</sub>)<sub>3</sub>C); HRMS (ESI) calcd. for C<sub>35</sub>H<sub>42</sub>NaO<sub>5</sub>Si [M+Na]<sup>+</sup> 593.2694; found 593.2695.

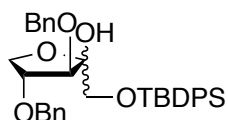

**3,4-Di-*O*-benzyl-1-*O*-*tert*-butyldiphenylsilyl- $\alpha/\beta$ -D-*threo*-pent-2-ulofuranose (19).**

To a solution of **18** (2.12 g, 3.71 mmol) in CH<sub>2</sub>Cl<sub>2</sub> (90 mL) was added bis(tri-*n*-butyltin) oxide (2.83 mL, 3.31 g, 5.58 mmol) at 0 °C, followed by bromine (285  $\mu$ L, 889 mg, 5.58 mmol) dropwise. After stirring for 2.5 h, the reaction mixture was concentrated. The resulting residue was purified by column chromatography (2:1, hexane–EtOAc) to give an inseparable  $\alpha/\beta$  mixture of **19** (1.14 g, 54%,  $\alpha/\beta = 1:7$ ) as a colorless oil.  $R_f$  0.34 (2:1, hexane–EtOAc): Data for **19 $\alpha$** : <sup>1</sup>H NMR (CDCl<sub>3</sub>, 500 MHz)  $\delta_H$  7.76–7.65 (m, 4H, ArH), 7.45–7.27 (m, 16H, ArH), 4.74–4.69 (m, 1H, ArCH<sub>2</sub>), 4.57–4.53 (m, 3H, ArCH<sub>2</sub>), 4.18–4.11 (m, 1H, H-5a), 4.08–4.04 (m, 3H, H-3, H-4, H-5b), 3.94–3.90 (m, 2H, H-1a, OH), 3.85–3.79 (m, 1H, H-1b), 1.08 (s, 9H, (CH<sub>3</sub>)<sub>3</sub>C); <sup>13</sup>C NMR (CDCl<sub>3</sub>, 125 MHz)  $\delta_C$  105.6 (C-2), 86.0 (C-3), 81.7 (C-4), 72.4 (ArCH<sub>2</sub>), 72.0 (ArCH<sub>2</sub>), 70.9 (C-5), 65.1 (C-1), 26.9 ((CH<sub>3</sub>)<sub>3</sub>C) 19.29 ((CH<sub>3</sub>)<sub>3</sub>C); Data for **19 $\beta$** : <sup>1</sup>H NMR (CDCl<sub>3</sub>, 500 MHz)  $\delta_H$  7.76–7.65 (m, 4H, ArH), 7.45–7.27 (m, 16H, ArH), 4.70 (d, 1H,  $J_{gem} = 11.6$  Hz, ArCH<sub>2</sub>), 4.54 (d, 1H,  $J_{gem} = 11.6$  Hz, ArCH<sub>2</sub>), 4.47 (s, 2H, ArCH<sub>2</sub>), 4.22–4.20 (m, 1H, H-4), 4.18–4.11 (m, 2H, H-3, H-5a), 4.03 (s, 1H, OH), 3.85–3.79 (m, 1H, H-5b), 3.76 (d, 1H,  $J_{gem} = 10.9$  Hz, H-1a), 3.73 (d, 1H,  $J_{gem} = 10.9$  Hz, H-1b), 1.07 (s, 9H, (CH<sub>3</sub>)<sub>3</sub>C); <sup>13</sup>C NMR (CDCl<sub>3</sub>, 125 MHz)  $\delta_C$  137.7 (Ar), 137.2 (Ar), 135.7 (2C, Ar), 135.64 (2C, Ar), 133.3 (Ar), 133.1 (Ar), 129.70 (2C, Ar), 129.68 (2C, Ar), 128.5 (2C, Ar), 128.46 (2C, Ar), 128.1 (2C, Ar), 128.0 (2C, Ar), 127.8 (2C, Ar), 127.9 (2C, Ar), 103.3 (C-2), 82.9 (C-3), 82.7 (C-4), 73.1 (ArCH<sub>2</sub>), 71.6 (ArCH<sub>2</sub>), 69.2 (C-5), 66.5 (C-1), 26.9 ((CH<sub>3</sub>)<sub>3</sub>C)



19.33 ((CH<sub>3</sub>)<sub>3</sub>C); HRMS (ESI) calcd. for C<sub>35</sub>H<sub>40</sub>NaO<sub>5</sub>Si [M+Na]<sup>+</sup> 591.2537; found 591.2539.

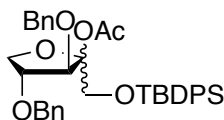

**2-*O*-acetyl-3,4-di-*O*-benyl-1-*O*-*tert*-butyldiphenylsilyl- $\alpha/\beta$ -D-*threo*-pent-2-**

**ulofuranose (20).** To a solution of the **19** (1.14 g, 2.00 mmol) in tetrahydrofuran (20.0 mL) was added acetic anhydride (227  $\mu$ L, 245 mg, 2.40 mmol) at room temperature. The mixture was cooled to  $-78$  °C and *n*-butyllithium (1.5 mL, 2.40 mmol) was added dropwise. After stirring for 2 h, satd aq NH<sub>4</sub>Cl was added and the mixture was extracted with EtOAc. The organic layer was then washed with brine and water. The organic layer was dried with MgSO<sub>4</sub> and then filtered. The filtrate was concentrated and the resulting residue was purified by column chromatography (4:1, hexane–EtOAc) to give an inseparable  $\alpha/\beta$  mixture of **20** (1.11 g, 91%,  $\alpha/\beta = 1:7$ ) as a yellow oil. R<sub>f</sub> 0.31 (4:1, hexane–EtOAc); Data for **20 $\beta$** : <sup>1</sup>H NMR (CDCl<sub>3</sub>, 500 MHz)  $\delta$ <sub>H</sub> 7.70–7.67 (m, 4H, ArH), 7.46–7.40 (m, 2H, ArH), 7.39–7.28 (m, 14H, ArH), 4.68 (d, 1H,  $J_{\text{gem}} = 11.5$  Hz, ArCH<sub>2</sub>), 4.58–4.51 (m, 4H, H-3, H-4, 2 x ArCH<sub>2</sub>), 4.50–4.43 (m, 2H, H-5a, ArCH<sub>2</sub>), 4.22–4.20 (m, 1H, H-4), 3.95 (d, 1H,  $J_{\text{gem}} = 11.0$  Hz, H-1a), 3.90–3.85 (m, 2H, H-1b, H-5b), 1.99 (s, 3H, CH<sub>3</sub>CO), 1.08 (s, 9H, (CH<sub>3</sub>)<sub>3</sub>C); <sup>13</sup>C NMR (CDCl<sub>3</sub>, 125 MHz)  $\delta$ <sub>C</sub> 169.1 (C=O), 138.1 (Ar), 138.0 (Ar), 135.75 (2C, Ar), 135.72 (2C, Ar), 133.2 (Ar), 133.0 (Ar), 129.84 (Ar), 129.80 (Ar), 128.42 (2C, Ar), 128.39 (2C, Ar), 127.78 (2C, Ar), 127.75 (2C, Ar), 127.71 (2C, Ar), 127.66 (2C, Ar), 127.63 (2C, Ar), 108.6 (C-2), 84.4 (C-3), 84.0 (C-4), 72.8 (ArCH<sub>2</sub>), 72.6 (C-5), 71.9 (ArCH<sub>2</sub>), 65.8 (C-1), 26.9 ((CH<sub>3</sub>)<sub>3</sub>C) 21.9 (CH<sub>3</sub>CO),

19.33 ((CH<sub>3</sub>)<sub>3</sub>C); HRMS (ESI) calcd. for C<sub>37</sub>H<sub>42</sub>NaO<sub>6</sub>Si [M+Na]<sup>+</sup> 633.2643; found 633.2643.

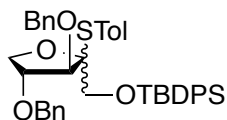

***p*-Tolyl 3,4-di-*O*-benyl-1-*O*-*tert*-butyldiphenylsilyl-2-thio- $\alpha/\beta$ -D-*threo*-pent-2-uloofuranoside (21).** To a solution of **20** (403 mg, 0.661 mmol) and thiocresol (98.3 mg, 0.791 mmol) in dichloromethane (6.6 mL) was added boron trifluoride diethyl etherate (106  $\mu$ L, 0.859 mmol) at 0 °C. After stirring for 1 h, the reaction mixture was added satd aq NaHCO<sub>3</sub> and then the solution was extracted with EtOAc. The organic layer was then washed with brine and water. The organic layer was dried with MgSO<sub>4</sub> and then filtered. The filtrate was concentrated and the resulting residue was purified by column chromatography (8:1, hexane–EtOAc) to give an inseparable  $\alpha/\beta$  mixture of **21** (357 mg, 80%,  $\alpha/\beta = 1:7$ ) as a yellow oil. *R*<sub>f</sub> 0.23 (8:1, hexane–EtOAc); Data for **21 $\alpha$** : <sup>1</sup>H NMR (CDCl<sub>3</sub>, 500 MHz)  $\delta$ <sub>H</sub> 7.66–7.61 (m, 4H, ArH), 7.45–7.24 (m, 14H, ArH), 7.02 (d, 2H, *J* = 8.5 Hz, ArH), 4.82 (d, 1H, *J*<sub>gem</sub> = 12.0 Hz, ArCH<sub>2</sub>), 4.75 (d, 1H, *J*<sub>gem</sub> = 12.0 Hz, ArCH<sub>2</sub>), 4.67–4.60 (m, 1H, ArCH<sub>2</sub>), 4.57–4.51 (m, 2H, H-4, ArCH<sub>2</sub>), 4.22 (dd, 1H, *J* = 7.5, 8.4 Hz, H-5a), 4.18 (d, 1H, *J* = 6.0 Hz, H-3), 3.93–3.91 (m, 1H, H-1a), 3.86–3.81 (m, 1H, H-5b), 3.70 (d, 1H, *J*<sub>gem</sub> = 10.7 Hz, H-1b), 2.33 (s, 3H, CH<sub>3</sub>), 1.01 (s, 9H, (CH<sub>3</sub>)<sub>3</sub>C); <sup>13</sup>C NMR (CDCl<sub>3</sub>, 125 MHz)  $\delta$ <sub>C</sub> 96.0 (C-2), 88.1 (C-3), 82.2 (C-4), 73.1 (ArCH<sub>2</sub>), 72.4 (ArCH<sub>2</sub>), 69.6 (C-5), 65.0 (C-1), 26.7 ((CH<sub>3</sub>)<sub>3</sub>C) 21.2 (ArCH<sub>3</sub>), 19.4 ((CH<sub>3</sub>)<sub>3</sub>C); Data for **21 $\beta$** : <sup>1</sup>H NMR (CDCl<sub>3</sub>, 500 MHz)  $\delta$ <sub>H</sub> 7.61–7.57 (m, 4H, ArH), 7.45–7.24 (m, 14H, ArH), 6.98 (d, 2H, *J* = 8.5 Hz, ArH), 4.87 (d, 1H, *J*<sub>gem</sub> = 12.0 Hz,

ArCH<sub>2</sub>), 4.65 (d, 1H,  $J_{\text{gem}} = 12.0$  Hz, ArCH<sub>2</sub>), 4.64 (d, 1H,  $J_{3,4} = 3.4$  Hz, H-3), 4.50 (d, 1H,  $J_{\text{gem}} = 12.0$  Hz, ArCH<sub>2</sub>), 4.45 (d, 1H,  $J_{\text{gem}} = 12.0$  Hz, ArCH<sub>2</sub>), 4.41–4.36 (m, 2H, H-4, H-5a), 3.96–3.91 (m, 1H, H-5b), 3.87 (d, 1H,  $J_{\text{gem}} = 11.2$  Hz, H-1a), 3.73 (d, 1H,  $J_{\text{gem}} = 11.2$  Hz, H1-b), 2.33 (s, 3H, CH<sub>3</sub>), 1.06 (s, 9H, (CH<sub>3</sub>)<sub>3</sub>C); <sup>13</sup>C NMR (CDCl<sub>3</sub>, 125 MHz)  $\delta_{\text{C}}$  138.02 (Ar), 137.98 (Ar), 137.9 (Ar), 136.0 (2C, Ar), 135.8 (2C, Ar), 135.7 (2C, Ar), 129.6 (Ar), 129.4 (Ar), 129.1 (2C, Ar), 128.4 (2C, Ar), 127.9 (2C, Ar), 127.72 (Ar), 127.69 (Ar), 127.66 (2C, Ar), 127.6 (2C, Ar), 127.5 (Ar), 99.0 (C-2), 85.5 (C-3), 84.1 (C-4), 73.0 (ArCH<sub>2</sub>), 71.5 (ArCH<sub>2</sub>), 69.7 (C-5), 65.6 (C-1), 26.9 ((CH<sub>3</sub>)<sub>3</sub>C), 21.2 (ArCH<sub>3</sub>), 19.4 ((CH<sub>3</sub>)<sub>3</sub>C); HRMS (ESI) calcd. for C<sub>42</sub>H<sub>46</sub>NaO<sub>4</sub>SSi [M+Na]<sup>+</sup> 697.2778; found 697.2788.

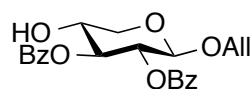

**Allyl 2,3-di-O-benzoyl- $\beta$ -D-xylopyranoside (27).** To a solution of **27a** (119 mg, 0.326 mmol) in dichloromethane (3 mL) was added triethylamine (98.8 mg, 135  $\mu$ L, 0.977 mmol), benzoyl chloride (137.2 mg, 113  $\mu$ L, 0.977 mmol) and DMAP (4.0 mg, 0.0326 mmol), and the mixture was stirred for 30 min at room temperature. After completion of the reaction, the benzoyl chloride was quenched by the addition of CH<sub>3</sub>OH and the solution was concentrated under reduced pressure. The residue was then diluted with CH<sub>2</sub>Cl<sub>2</sub> and washed with 1N HCl, H<sub>2</sub>O, satd aq NaHCO<sub>3</sub> and brine. The organic layers were dried with MgSO<sub>4</sub> and then filtered. The filtrate was then concentrated for the next step. To a solution of the residue in acetic acid (3 mL) was added activated zinc dust (2.4 g) and the reaction mixture was stirred at 50 °C for 3 h. After completion of the reaction, the reaction mixture was cooled and then passed through Celite. The

filtrate was then diluted with CH<sub>2</sub>Cl<sub>2</sub> and washed with water, satd aq NaHCO<sub>3</sub> and brine. The organic layer was dried with MgSO<sub>4</sub> and then filtered. The filtrate was then concentrated under reduced pressure. The resulting residue was purified by column chromatography (3:1, hexane–EtOAc) to give **27** (120 mg, 93% over two steps) as a white foam.  $[\alpha]_D^{25} +69.6$  (*c* 0.6, CHCl<sub>3</sub>); *R<sub>f</sub>* 0.15 (4:1, hexane–EtOAc); <sup>1</sup>H NMR (CDCl<sub>3</sub>, 500 MHz)  $\delta_H$  8.05–7.98 (m, 4H, ArH), 7.58–7.52 (m, 2H, ArH), 7.45–7.38 (m, 4H, ArH), 5.84 (dddd, 1H, *J* = 16.6, 10.6, 6.0, 5.0 Hz, OCH<sub>2</sub>CH=CH<sub>2</sub>), 5.40 (dd, 1H, *J*<sub>2,1</sub> = 6.2 Hz, *J*<sub>2,3</sub> = 8.1 Hz, H-2), 5.32–5.25 (m, 2H, OCH<sub>2</sub>CH=CH<sub>2</sub>, H-3), 5.17 (dq, 1H, *J* = 10.6, 1.2 Hz, OCH<sub>2</sub>CH=CH<sub>2</sub>), 4.78 (d, 1H, *J*<sub>1,2</sub> = 6.2 Hz, H-1), 4.34 (ddt, 1H, *J* = 13.4, 5.0, 1.6 Hz, OCH<sub>2</sub>CH=CH<sub>2</sub>), 4.24 (dd, 1H, *J*<sub>5a,4</sub> = 4.7 Hz, *J*<sub>gem</sub> = 12.0 Hz, H-5a), 4.13 (ddt, 1H, *J* = 13.4, 6.0, 1.6 Hz, OCH<sub>2</sub>CH=CH<sub>2</sub>), 4.05–3.99 (m, 1H, H-4), 3.55 (dd, 1H, *J*<sub>5b,4</sub> = 8.0 Hz, *J*<sub>gem</sub> = 12.0 Hz, H-5b), 3.08 (d, 1H, *J*<sub>OH,4</sub> = 5.8 Hz, OH); <sup>13</sup>C NMR (CDCl<sub>3</sub>, 125 MHz)  $\delta_C$  167.3 (C=O), 165.2 (C=O), 133.7 (OCH<sub>2</sub>CH=CH<sub>2</sub>), 133.6 (Ar), 133.4 (Ar), 130.1 (2C, Ar), 129.8 (2C, Ar), 129.4 (Ar), 129.0 (Ar), 128.52 (2C, Ar), 128.49 (2C, Ar), 117.7 (OCH<sub>2</sub>CH=CH<sub>2</sub>), 99.4 (C-1), 75.7 (C-3), 70.5 (C-2), 69.6 (OCH<sub>2</sub>CH=CH<sub>2</sub>), 68.8 (C-4), 64.6 (C-5); HRMS (ESI) calcd. for C<sub>22</sub>H<sub>22</sub>NaO<sub>7</sub> [M+Na]<sup>+</sup> 421.1258; found 421.1261.

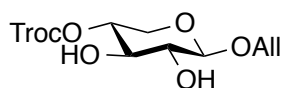

**Allyl 4-O-2,2,2-trichloroethoxycarbonyl- $\beta$ -D-xylopyranoside (27a).** To a solution of **S1**<sup>2</sup> (74 mg, 0.389 mmol) in toluene (20 mL) was added *n*-Bu<sub>2</sub>SnO (145 mg, 0.584 mmol) at room temperature and the reaction mixture was stirred at reflux. After 5 h, the reaction mixture was cooled to room temperature and 2,2,2-trichloroethyl

chloroformate (123.6 mg, 80.3  $\mu\text{L}$ , 0.584 mmol) and CsF (88.6 mg, 0.584 mmol) were added. The reaction mixture was continually stirred at reflux for 2 h. The solution was cooled to room temperature and then concentrated under reduced pressure. The resulting residue was purified by column chromatography (3:1, hexane–EtOAc) to give **27a** (119 mg, 84%) as a colorless oil.  $[\alpha]_{\text{D}}^{25} -37.8$  ( $c$  1.4,  $\text{CHCl}_3$ );  $R_f$  0.55 (1:1, hexane–EtOAc);  $^1\text{H NMR}$  ( $\text{CDCl}_3$ , 500 MHz)  $\delta_{\text{H}}$  5.93 (dddd, 1H,  $J = 16.7, 10.3, 6.3, 5.4$  Hz,  $\text{OCH}_2\text{CH}=\text{CH}_2$ ), 5.32 (dq, 1H,  $J = 17.1, 1.6$  Hz,  $\text{OCH}_2\text{CH}=\text{CH}_2$ ), 5.25 (dq, 1H,  $J = 10.3, 1.6$  Hz,  $\text{OCH}_2\text{CH}=\text{CH}_2$ ), 4.82 (d, 1H,  $J_{\text{gem}} = 11.8$  Hz, Troc  $\text{CH}_2$ ), 4.81–4.76 (m, 1H, H-4), 4.76 (d, 1H,  $J_{\text{gem}} = 11.8$  Hz, Troc  $\text{CH}_2$ ), 4.46 (d, 1H,  $J_{1,2} = 6.3$  Hz, H-1), 4.35 (ddt, 1H,  $J = 12.7, 5.3, 1.4$  Hz,  $\text{OCH}_2\text{CH}=\text{CH}_2$ ), 4.18 (dd, 1H,  $J_{5a,4} = 4.7$  Hz,  $J_{\text{gem}} = 12.1$  Hz, H-5a), 4.13 (ddt, 1H,  $J = 12.7, 5.3, 1.3$  Hz,  $\text{OCH}_2\text{CH}=\text{CH}_2$ ), 3.84 (dt, 1H,  $J_{3,2} = J_{3,4} = 7.8$  Hz,  $J_{3,\text{OH}} = 4.6$  Hz, H-3), 3.55 (ddd, 1H,  $J_{2,1} = 6.3$  Hz,  $J_{2,3} = 7.8$  Hz,  $J_{2,\text{OH}} = 4.6$  Hz, H-2), 3.47 (dd, 1H,  $J_{5b,4} = 8.1$  Hz,  $J_{\text{gem}} = 12.1$  Hz, H-5b), 3.10 (d, 1H,  $J_{\text{OH},3} = 4.6$  Hz, OH), 2.80 (d, 1H,  $J_{\text{OH},2} = 4.6$  Hz, OH);  $^{13}\text{C NMR}$  ( $\text{CDCl}_3$ , 125 MHz)  $\delta_{\text{C}}$  153.5 (C=O), 133.5 ( $\text{OCH}_2\text{CH}=\text{CH}_2$ ), 118.7 ( $\text{OCH}_2\text{CH}=\text{CH}_2$ ), 101.5 (C-1), 77.5 (Troc  $\text{CH}_2$ ), 75.7 (C-4), 72.5 (C-2), 72.2 (C-3), 70.3 ( $\text{OCH}_2\text{CH}=\text{CH}_2$ ), 61.4 (C-5); HRMS (ESI) calcd. for  $\text{C}_{11}\text{H}_{15}\text{Cl}_3\text{NaO}_7$   $[\text{M}+\text{Na}]^+$  386.9776; found 386.9772.

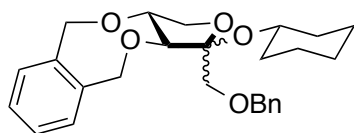

**Cyclohexyl 1-O-benzyl-3,4-O-xylylene- $\alpha$ -D-threo-pent-2-ulofuranoside (29 $\alpha$ ) and Cyclohexyl 1-O-benzyl-3,4-O-xylylene- $\beta$ -D-threo-pent-2-ulofuranoside (29 $\beta$ ).** A mixture of **7** (56 mg, 0.156 mmol), **22** (18.7 mg, 0.187 mmol) and 4Å molecular sieves

in CH<sub>2</sub>Cl<sub>2</sub> (6.2 mL) was stirred under an Ar atmosphere at room temperature for 30 min. The mixture was then cooled to -78 °C before *N*-iodosuccinimide (42.1 mg, 0.187 mmol) and silver triflate (4.0 mg, 0.0156 mmol) were added. After stirring at -78 °C for 2 h, triethylamine was added. The reaction mixture was warmed to room temperature and then a small amount of water was added, followed by solid Na<sub>2</sub>S<sub>2</sub>O<sub>3</sub>·5H<sub>2</sub>O until the solution was colorless. The solution was then dried over MgSO<sub>4</sub>, filtered and the filtrate was concentrated under reduced pressure. The resulting residue was purified by column chromatography (9:1, hexane–EtOAc) to give **29α** (21.0 mg, 39%) as a colorless oil and **29β** (23.0 mg, 43%) as a colorless oil. Data for **29α**: [α]<sub>D</sub><sup>25</sup> +47.8 (*c* 2.1, CHCl<sub>3</sub>); R<sub>f</sub> 0.33 (9:1, hexane–EtOAc); <sup>1</sup>H NMR (CDCl<sub>3</sub>, 500 MHz) δ<sub>H</sub> 7.41–7.35 (m, 3H, ArH), 7.35–7.29 (m, 5H, ArH), 7.29–7.26 (m, 1H, ArH), 4.92 (d, 1H, *J*<sub>gem</sub> = 12.0 Hz, ArCH<sub>2</sub>), 4.91 (d, 1H, *J*<sub>gem</sub> = 12.0 Hz, ArCH<sub>2</sub>), 4.77 (d, 1H, *J*<sub>gem</sub> = 12.0 Hz, ArCH<sub>2</sub>), 4.76 (d, 1H, *J*<sub>gem</sub> = 12.0 Hz, ArCH<sub>2</sub>), 4.59 (d, 1H, *J*<sub>gem</sub> = 12.0 Hz, ArCH<sub>2</sub>), 4.56 (d, 1H, *J*<sub>gem</sub> = 12.0 Hz, ArCH<sub>2</sub>), 4.20 (dt, 1H, *J*<sub>4,3</sub> = 5.2 Hz, *J*<sub>4,5a</sub> = *J*<sub>4,5b</sub> = 8.1 Hz, H-4), 4.07 (app t, 1H, *J*<sub>5a,4</sub> = *J*<sub>gem</sub> = 8.1 Hz, H-5a), 4.05 (d, 1H, *J*<sub>3,4</sub> = 5.2 Hz, H-3), 3.76 (app t, 1H, *J*<sub>5b,4</sub> = *J*<sub>gem</sub> = 8.1 Hz, H-5b), 3.68–3.62 (m, 1H, cyclohexyl OCH), 3.63 (d, 1H, *J*<sub>gem</sub> = 10.5 Hz, H-1a), 3.50 (d, 1H, *J*<sub>gem</sub> = 10.5 Hz, H-1b), 1.83–1.76 (m, 1H, cyclohexyl CH<sub>2</sub>), 1.73–1.61 (m, 3H, cyclohexyl CH<sub>2</sub>), 1.52–1.44 (m, 1H, cyclohexyl CH<sub>2</sub>), 1.30–1.07 (m, 5H, cyclohexyl CH<sub>2</sub>); <sup>13</sup>C NMR (CDCl<sub>3</sub>, 125 MHz) δ<sub>C</sub> 138.8 (Ar), 136.7 (Ar), 136.3 (Ar), 131.8 (Ar), 131.6 (Ar), 129.66 (Ar), 129.63 (Ar), 128.4 (2C, Ar), 127.9 (2C, Ar), 127.6 (Ar), 109.4 (C-2), 87.5 (C-3), 81.4 (C-4), 73.7 (ArCH<sub>2</sub>), 71.2 (cyclohexyl OCH), 70.1 (C-1), 69.8 (ArCH<sub>2</sub>), 69.3 (ArCH<sub>2</sub>), 68.8 (C-5), 35.0 (cyclohexyl CH<sub>2</sub>), 34.6 (cyclohexyl CH<sub>2</sub>), 25.7 (cyclohexyl CH<sub>2</sub>), 24.9 (2C,

cyclohexyl CH<sub>2</sub>); HRMS (ESI) calcd. for C<sub>26</sub>H<sub>32</sub>NaO<sub>5</sub> [M+Na]<sup>+</sup> 447.2142; found 447.2145. Data for **29β**: [α]<sup>25</sup><sub>D</sub> +11.8 (*c* 2.8, CHCl<sub>3</sub>); R<sub>f</sub> 0.15 (9:1, hexane–EtOAc); <sup>1</sup>H NMR (CDCl<sub>3</sub>, 500 MHz) δ<sub>H</sub> 7.41–7.33 (m, 4H, ArH), 7.33–7.24 (m, 3H, ArH), 7.21–7.17 (m, 2H, ArH), 5.05 (d, 1H, *J*<sub>gem</sub> = 12.8 Hz, ArCH<sub>2</sub>), 4.85 (d, 1H, *J*<sub>gem</sub> = 12.8 Hz, ArCH<sub>2</sub>), 4.81 (d, 1H, *J*<sub>gem</sub> = 12.8 Hz, ArCH<sub>2</sub>), 4.79 (d, 1H, *J*<sub>gem</sub> = 12.8 Hz, ArCH<sub>2</sub>), 4.59 (d, 1H, *J*<sub>gem</sub> = 12.2 Hz, ArCH<sub>2</sub>), 4.44 (d, 1H, *J*<sub>gem</sub> = 12.2 Hz, ArCH<sub>2</sub>), 4.20 (ddd, 1H, *J*<sub>4,3</sub> = 5.4 Hz, *J*<sub>4,5a</sub> = 7.2 Hz, *J*<sub>4,5b</sub> = 3.9 Hz, H-4), 4.23 (dd, 1H, *J*<sub>5a,4</sub> = 7.2 Hz, *J*<sub>gem</sub> = 9.4 Hz, H-5a), 4.20 (d, 1H, *J*<sub>3,4</sub> = 5.4 Hz, H-3), 3.76 (dd, 1H, *J*<sub>5b,4</sub> = 3.9 Hz, *J*<sub>gem</sub> = 9.4 Hz, H-5b), 3.67 (app tt, 1H, *J* = 10.8, 4.1 Hz, cyclohexyl OCH), 3.53 (s, 2H, H-1), 1.80–1.74 (m, 1H, cyclohexyl CH<sub>2</sub>), 1.73–1.65 (m, 3H, cyclohexyl CH<sub>2</sub>), 1.56–1.48 (m, 1H, cyclohexyl CH<sub>2</sub>), 1.44–1.29 (m, 2H, cyclohexyl CH<sub>2</sub>), 1.28–1.14 (m, 2H, cyclohexyl CH<sub>2</sub>), 1.12–1.02 (m, 1H, cyclohexyl CH<sub>2</sub>); <sup>13</sup>C NMR (CDCl<sub>3</sub>, 125 MHz) δ<sub>C</sub> 138.3 (Ar), 137.0 (Ar), 136.3 (Ar), 131.8 (Ar), 131.5 (Ar), 129.51 (Ar), 129.47 (Ar), 128.5 (2C, Ar), 127.8 (2C, Ar), 127.7 (Ar), 107.1 (C-2), 82.9 (C-3), 81.2 (C-4), 73.6 (ArCH<sub>2</sub>), 71.0 (2C, cyclohexyl OCH, C-5), 70.0 (ArCH<sub>2</sub>), 69.1 (2C, C-1, ArCH<sub>2</sub>), 35.1 (cyclohexyl CH<sub>2</sub>), 34.7 (cyclohexyl CH<sub>2</sub>), 25.6 (cyclohexyl CH<sub>2</sub>), 25.3 (cyclohexyl CH<sub>2</sub>), 25.2 (cyclohexyl CH<sub>2</sub>); HRMS (ESI) calcd. for C<sub>26</sub>H<sub>32</sub>NaO<sub>5</sub> [M+Na]<sup>+</sup> 447.2142; found 447.2144.

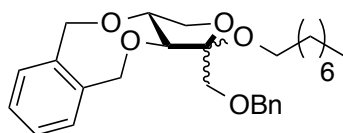

**Octyl 1-O-benzyl-3,4-O-xylylidene- $\alpha$ -D-threo-pent-2-ulofuranoside (30 $\alpha$ ) and Octyl 1-O-benzyl-3,4-O-xylylidene- $\beta$ -D-threo-pent-2-ulofuranoside (30 $\beta$ ).** A

mixture of **7** (27.4 mg, 0.0611 mmol), **23** (9.5 mg, 11.6  $\mu$ L, 0.0733 mmol), and 4Å molecular sieves in CH<sub>2</sub>Cl<sub>2</sub> (2.4 mL) was stirred under an Ar atmosphere at room temperature for 30 min. The mixture was then cooled to –78 °C and then *N*-iodosuccinimide (16.5 mg, 0.0733 mmol) and silver triflate (1.6 mg, 6.11  $\mu$ mol) were added. After stirring for 1 h at –78 °C, triethylamine was added. The reaction was warmed to room temperature and then a small amount of water was added, followed by solid Na<sub>2</sub>S<sub>2</sub>O<sub>3</sub>·5H<sub>2</sub>O until the solution was colorless. The solution was then dried over MgSO<sub>4</sub>, filtered and the filtrate was concentrated under reduced pressure. The resulting residue was purified by column chromatography (15:1, hexane–EtOAc) to give **30a** (12.2 mg, 44%) as a colorless oil and **30b** (13.0 mg, 47%) as a colorless oil. Data for **30a**: [ $\alpha$ ]<sub>D</sub><sup>25</sup> +56.2 (*c* 1.2, CHCl<sub>3</sub>); R<sub>f</sub> 0.61 (4:1, hexane–EtOAc); <sup>1</sup>H NMR (CDCl<sub>3</sub>, 500 MHz)  $\delta$ <sub>H</sub> 7.41–7.31 (m, 8H, ArH), 7.30–7.26 (m, 1H, ArH), 4.92 (d, 1H, *J*<sub>gem</sub> = 12.5 Hz, ArCH<sub>2</sub>), 4.91 (d, 1H, *J*<sub>gem</sub> = 12.5 Hz, ArCH<sub>2</sub>), 4.77 (d, 1H, *J*<sub>gem</sub> = 12.5 Hz, ArCH<sub>2</sub>), 4.76 (d, 1H, *J*<sub>gem</sub> = 12.5 Hz, ArCH<sub>2</sub>), 4.58 (d, 1H, *J*<sub>gem</sub> = 12.2 Hz, ArCH<sub>2</sub>), 4.56 (d, 1H, *J*<sub>gem</sub> = 12.2 Hz, ArCH<sub>2</sub>), 4.16 (app dt, 1H, *J*<sub>4,3</sub> = 5.0 Hz, *J*<sub>4,5a</sub> = *J*<sub>4,5b</sub> = 8.1 Hz, H-4), 4.07 (d, 1H, *J*<sub>3,4</sub> = 5.0 Hz, H-3), 4.04 (app t, 1H, *J*<sub>5a,4</sub> = 8.1 Hz, *J*<sub>gem</sub> = 8.4 Hz, H-5a), 3.69 (app t, 1H, *J*<sub>5b,4</sub> = 8.1 Hz, *J*<sub>gem</sub> = 8.4 Hz, H-5b), 3.59 (d, 1H, *J*<sub>gem</sub> = 10.5 Hz, H-1a), 3.53 (d, 1H, *J*<sub>gem</sub> = 10.5 Hz, H-1b), 3.46 (app t, 2H, *J* = 6.9 Hz, octyl OCH<sub>2</sub>), 1.53–1.45 (m, 2H, octyl CH<sub>2</sub>), 1.33–1.20 (m, 10H, octyl CH<sub>2</sub>), 0.87 (t, 3H, *J* = 7.1 Hz, octyl CH<sub>3</sub>); <sup>13</sup>C NMR (CDCl<sub>3</sub>, 125 MHz)  $\delta$ <sub>C</sub> 138.6 (Ar), 136.6 (Ar), 136.1 (Ar), 131.7 (Ar), 131.5 (Ar), 129.6 (Ar), 129.5 (Ar), 128.2 (2C, Ar), 127.8 (2C, Ar), 127.5 (Ar), 108.5 (C-2), 86.8 (C-3), 81.4 (C-4), 73.5 (ArCH<sub>2</sub>), 69.8 (ArCH<sub>2</sub>), 69.1 (ArCH<sub>2</sub>), 68.6 (C-1), 68.2 (C-5), 61.7 (octyl OCH<sub>2</sub>), 31.9 (octyl CH<sub>2</sub>), 30.1 (octyl CH<sub>2</sub>), 29.4 (octyl CH<sub>2</sub>), 29.3 (octyl



CH<sub>2</sub>), 26.2 (octyl CH<sub>2</sub>), 22.7 (octyl CH<sub>2</sub>), 14.2 (octyl CH<sub>3</sub>); HRMS (ESI) calcd. for C<sub>28</sub>H<sub>38</sub>NaO<sub>5</sub> [M+Na]<sup>+</sup> 477.2611; found 477.2616. Data for **30β**: [α]<sub>D</sub><sup>25</sup> +14.6 (*c* 1.3, CHCl<sub>3</sub>); R<sub>f</sub> 0.48 (4:1, hexane–EtOAc); <sup>1</sup>H NMR (CDCl<sub>3</sub>, 500 MHz) δ<sub>H</sub> 7.42–7.35 (m, 4H, ArH), 7.33–7.26 (m, 3H, ArH), 7.24–7.20 (m, 2H, ArH), 5.01 (d, 1H, *J*<sub>gem</sub> = 12.8 Hz, ArCH<sub>2</sub>), 4.90 (d, 1H, *J*<sub>gem</sub> = 12.8 Hz, ArCH<sub>2</sub>), 4.81 (d, 1H, *J*<sub>gem</sub> = 12.8 Hz, ArCH<sub>2</sub>), 4.76 (d, 1H, *J*<sub>gem</sub> = 12.8 Hz, ArCH<sub>2</sub>), 4.59 (d, 1H, *J*<sub>gem</sub> = 12.2 Hz, ArCH<sub>2</sub>), 4.48 (d, 1H, *J*<sub>gem</sub> = 12.2 Hz, ArCH<sub>2</sub>), 4.34 (ddd, 1H, *J*<sub>4,5b</sub> = 4.0 Hz, *J*<sub>4,3</sub> = 5.2 Hz, *J*<sub>4,5a</sub> = 7.6 Hz, H-4), 4.20 (d, 1H, *J*<sub>3,4</sub> = 5.2 Hz, H-3), 4.15 (dd, 1H, *J*<sub>5a,4</sub> = 7.6 Hz, *J*<sub>gem</sub> = 9.6 Hz, H-5a), 3.79 (dd, 1H, *J*<sub>5b,4</sub> = 4.0 Hz, *J*<sub>gem</sub> = 9.6 Hz, H-5b), 3.56 (d, 1H, *J*<sub>gem</sub> = 10.8 Hz, H-1a), 3.54 (d, 1H, *J*<sub>gem</sub> = 10.8 Hz, H-1b), 3.52 (app dt, 1H, *J* = 9.1, 7.6 Hz, OCH<sub>2</sub>), 3.41 (app dt, 1H, *J* = 9.1, 7.6 Hz, OCH<sub>2</sub>), 1.58–1.49 (m, 2H, octyl CH<sub>2</sub>), 1.31–1.19 (m, 10H, octyl CH<sub>2</sub>), 0.87 (t, 3H, *J* = 7.0 Hz, octyl CH<sub>3</sub>); <sup>13</sup>C NMR (CDCl<sub>3</sub>, 125 MHz) δ<sub>C</sub> 138.1 (Ar), 136.5 (Ar), 136.4 (Ar), 131.6 (Ar), 131.5 (Ar), 129.5 (2C, Ar), 128.4 (2C, Ar), 127.7 (2C, Ar), 127.6 (Ar), 106.4 (C-2), 83.2 (C-3), 80.8 (C-4), 73.4 (ArCH<sub>2</sub>), 70.8 (C-5), 69.8 (ArCH<sub>2</sub>), 68.6 (ArCH<sub>2</sub>), 68.2 (C-1), 61.7 (octyl OCH<sub>2</sub>), 31.9 (octyl CH<sub>2</sub>), 30.2 (octyl CH<sub>2</sub>), 29.4 (octyl CH<sub>2</sub>), 29.3 (octyl CH<sub>2</sub>), 26.1 (octyl CH<sub>2</sub>), 22.7 (octyl CH<sub>2</sub>), 14.1 (octyl CH<sub>3</sub>); HRMS (ESI) calcd. for C<sub>28</sub>H<sub>38</sub>NaO<sub>5</sub> [M+Na]<sup>+</sup> 477.2611; found 477.2619.

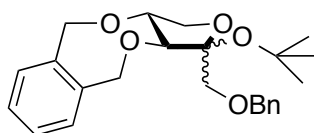

***tert*-Butyl 1-*O*-benzyl-3,4-*O*-xylylidene- $\alpha$ -D-*threo*-pent-2-ulofuranoside (31 $\alpha$ ) and *tert*-Butyl 1-*O*-benzyl-3,4-*O*-xylylidene- $\beta$ -D-*threo*-pent-2-ulofuranoside (31 $\beta$ ).** A

mixture of the **7** (24.1 mg, 0.0537 mmol), **24** (4.8 mg, 0.0644 mmol), and 4Å molecular sieves in CH<sub>2</sub>Cl<sub>2</sub> (2.14 mL) was stirred under an Ar atmosphere at room temperature for 30 min. The mixture was then cooled to –78 °C and *N*-iodosuccinimide (14.5 mg, 0.0644 mmol) and silver triflate (1.4 mg, 5.37 μmol) were added. After stirring for 4 h at –78 °C, triethylamine was added. The reaction was warmed to room temperature and then a small amount of water was added, followed by solid Na<sub>2</sub>S<sub>2</sub>O<sub>3</sub>·5H<sub>2</sub>O until the solution was colorless. The solution was then dried over MgSO<sub>4</sub>, filtered and the filtrate was concentrated under reduced pressure. The resulting residue was purified by column chromatography (10:1, hexane–EtOAc) to give **31α** (6.7 mg, 31%) and **31β** (9.8 mg, 46%), both as colorless oils. Data for **31α**: [α]<sub>D</sub><sup>25</sup> +24.6 (*c* 0.7, CHCl<sub>3</sub>); R<sub>f</sub> 0.31 (6:1, hexane–EtOAc); <sup>1</sup>H NMR (CDCl<sub>3</sub>, 500 MHz) δ<sub>H</sub> 7.41–7.37 (m, 3H, ArH), 7.34–7.25 (m, 6H, ArH), 4.93 (d, 1H, *J*<sub>gem</sub> = 12.9 Hz, ArCH<sub>2</sub>), 4.90 (d, 1H, *J*<sub>gem</sub> = 12.9 Hz, ArCH<sub>2</sub>), 4.80 (d, 1H, *J*<sub>gem</sub> = 12.9 Hz, ArCH<sub>2</sub>), 4.75 (d, 1H, *J*<sub>gem</sub> = 12.9 Hz, ArCH<sub>2</sub>), 4.54 (d, 1H, *J*<sub>gem</sub> = 11.9 Hz, ArCH<sub>2</sub>), 4.50 (d, 1H, *J*<sub>gem</sub> = 11.9 Hz, ArCH<sub>2</sub>), 4.27 (app dt, 1H, *J*<sub>4,3</sub> = 5.9 Hz, *J*<sub>4,5a</sub> = *J*<sub>4,5b</sub> = 8.0 Hz, H-4), 4.15 (d, 1H, *J*<sub>3,4</sub> = 5.9 Hz, H-3), 4.13 (dd, 1H, *J*<sub>5a,4</sub> = 8.0 Hz, *J*<sub>gem</sub> = 8.4 Hz, H-5a), 3.78 (dd, 1H, *J*<sub>5b,4</sub> = 8.0 Hz, *J*<sub>gem</sub> = 8.4 Hz, H-5b), 3.60 (d, 1H, *J*<sub>gem</sub> = 10.0 Hz, H-1a), 3.49 (d, 1H, *J*<sub>gem</sub> = 10.0 Hz, H-1b), 1.25 (s, 9H, (CH<sub>3</sub>)<sub>3</sub>C); <sup>13</sup>C NMR (CDCl<sub>3</sub>, 125 MHz) δ<sub>C</sub> 138.9 (Ar), 136.8 (Ar), 136.6 (Ar), 131.8 (Ar), 131.4 (Ar), 129.59 (Ar), 129.55 (Ar), 128.3 (2C, Ar), 127.8 (2C, Ar), 127.5 (Ar), 110.3 (C-2), 88.8 (C-3), 80.5 (C-4), 76.0 (CH<sub>3</sub>)<sub>3</sub>C, 73.4 (ArCH<sub>2</sub>), 72.0 (C-1), 69.6 (C-5), 69.2 (ArCH<sub>2</sub>), 69.0 (ArCH<sub>2</sub>), 30.7 (3C, (CH<sub>3</sub>)<sub>3</sub>C); HRMS (ESI) calcd. for C<sub>24</sub>H<sub>30</sub>NaO<sub>5</sub> [M+Na]<sup>+</sup> 421.1985; found 421.1984. Data for **31β**: [α]<sub>D</sub><sup>25</sup> +25.2 (*c* 1.0, CHCl<sub>3</sub>); R<sub>f</sub> 0.16 (6:1, hexane–EtOAc); <sup>1</sup>H NMR (CDCl<sub>3</sub>, 500 MHz) δ<sub>H</sub> 7.40–7.20 (m, 7H, ArH), 7.22–

7.17 (m, 2H, ArH), 5.06 (d, 1H,  $J_{\text{gem}} = 12.9$  Hz, ArCH<sub>2</sub>), 4.83 (s, 2H, ArCH<sub>2</sub>), 4.81 (d, 1H,  $J_{\text{gem}} = 12.9$  Hz, ArCH<sub>2</sub>), 4.59 (d, 1H,  $J_{\text{gem}} = 12.1$  Hz, ArCH<sub>2</sub>), 4.46 (d, 1H,  $J_{\text{gem}} = 12.1$  Hz, ArCH<sub>2</sub>), 4.39 (ddd, 1H,  $J_{4,3} = 6.0$  Hz,  $J_{4,5a} = 7.6$  Hz,  $J_{4,5b} = 4.4$  Hz, H-4), 4.22 (dd, 1H,  $J_{5a,4} = 7.6$  Hz,  $J_{\text{gem}} = 9.5$  Hz, H-5a), 4.19 (d, 1H,  $J_{3,4} = 6.0$  Hz, H-3), 3.74 (dd, 1H,  $J_{5b,4} = 4.4$  Hz,  $J_{\text{gem}} = 9.5$  Hz, H-5b), 3.71 (d, 1H,  $J_{\text{gem}} = 10.4$  Hz, H-1a), 3.57 (d, 1H,  $J_{\text{gem}} = 10.4$  Hz, H-1b), 1.29 (s, 9H, (CH<sub>3</sub>)<sub>3</sub>C); <sup>13</sup>C NMR (CDCl<sub>3</sub>, 125 MHz)  $\delta_{\text{C}}$  138.2 (Ar), 136.8 (Ar), 136.7 (Ar), 131.7 (Ar), 131.0 (Ar), 129.2 (Ar), 129.1 (Ar), 128.3 (2C, Ar), 127.7 (2C, Ar), 127.5 (Ar), 107.6 (C-2), 83.4 (C-3), 80.7 (C-4), 75.6 (CH<sub>3</sub>)<sub>3</sub>C, 73.4 (ArCH<sub>2</sub>), 70.4 (C-1), 70.0 (2C, C-5, ArCH<sub>2</sub>), 69.0 (ArCH<sub>2</sub>), 31.0 (3C, (CH<sub>3</sub>)<sub>3</sub>C); HRMS (ESI) calcd. for C<sub>24</sub>H<sub>30</sub>NaO<sub>5</sub> [M+Na]<sup>+</sup> 421.1985; found 421.1983.

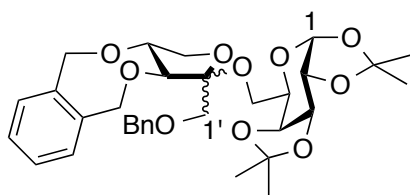

**1-O-benzyl-3,4-O-xylylidene- $\alpha$ -D-threo-pent-2-ulofuranosyl-(2 $\rightarrow$ 6)-1,2,3,4-di-O-isopropylidene- $\alpha$ -D-galactopyranose (32 $\alpha$ )** and **1-O-benzyl-3,4-O-xylylidene- $\beta$ -D-threo-pent-2-ulofuranosyl-(2 $\rightarrow$ 6)-1,2,3,4-di-O-isopropylidene- $\alpha$ -D-galactopyranose (32 $\beta$ )**. A mixture of **7** (18.9 mg, 0.0421 mmol), **25** (10.4 mg, 0.0506 mmol), and 4Å molecular sieves in CH<sub>2</sub>Cl<sub>2</sub> (1.7 mL) was stirred under an Ar atmosphere at room temperature for 30 min. The mixture was then cooled to -78 °C and *N*-iodosuccinimide (11.4 mg, 0.0506 mmol) and silver triflate (1.1 mg, 4.21  $\mu$ mol) were added. After stirring for 1 h at -78 °C, triethylamine was added. The reaction was warmed to room temperature and then a small amount of water was added, followed by solid Na<sub>2</sub>S<sub>2</sub>O<sub>3</sub>·5H<sub>2</sub>O until the solution was colorless. The solution was then dried over

MgSO<sub>4</sub>, filtered and the filtrate was concentrated under reduced pressure. The resulting residue was purified by column chromatography (10:1, hexane–EtOAc) to give **32a** (7.6 mg, 31%) and **32b** (11.5 mg, 47%) both as colorless oils. Data for **32a**:  $[\alpha]_D^{25} +15.4$  (*c* 0.8, CHCl<sub>3</sub>); *R<sub>f</sub>* 0.47 (2:1, hexane–EtOAc); <sup>1</sup>H NMR (CDCl<sub>3</sub>, 500 MHz)  $\delta_H$  7.41–7.31 (m, 8H, ArH), 7.30–7.26 (m, 1H, ArH), 5.51 (d, 1H, *J*<sub>1,2</sub> = 4.9 Hz, H-1), 4.94 (d, 1H, *J*<sub>gem</sub> = 12.6 Hz, ArCH<sub>2</sub>), 4.90 (d, 1H, *J*<sub>gem</sub> = 12.6 Hz, ArCH<sub>2</sub>), 4.78 (d, 1H, *J*<sub>gem</sub> = 12.6 Hz, ArCH<sub>2</sub>), 4.77 (d, 1H, *J*<sub>gem</sub> = 12.6 Hz, ArCH<sub>2</sub>), 4.59 (d, 1H, *J*<sub>gem</sub> = 12.2 Hz, ArCH<sub>2</sub>), 4.56 (dd, 1H, *J*<sub>3,2</sub> = 2.4 Hz, *J*<sub>3,4</sub> = 7.9 Hz, H-3), 4.55 (d, 1H, *J*<sub>gem</sub> = 12.2 Hz, ArCH<sub>2</sub>), 4.28 (dd, 1H, *J*<sub>2,1</sub> = 4.9 Hz, *J*<sub>2,3</sub> = 2.4 Hz, H-2), 4.22 (dd, 1H, *J*<sub>4,3</sub> = 7.9 Hz, *J*<sub>4,5</sub> = 1.9 Hz, H-4), 4.17–4.13 (m, 2H, H-3', H-4'), 4.05–4.01 (m, 1H, H-5'a), 3.91 (app dt, 1H, *J*<sub>5,4</sub> = 1.9 Hz, *J*<sub>5,6a</sub> = *J*<sub>5,6b</sub> = 6.3 Hz, H-5), 3.80–3.73 (m, 2H, H-6a, H-5'b), 3.70 (dd, 1H, *J*<sub>6b,5</sub> = 6.3 Hz, *J*<sub>gem</sub> = 10.3 Hz, H-6b), 3.63 (d, 1H, *J*<sub>gem</sub> = 10.7 Hz, H-1'a), 3.58 (d, 1H, *J*<sub>gem</sub> = 10.7 Hz, H-1'b), 1.52 (s, 3H, (CH<sub>3</sub>)<sub>2</sub>C), 1.42 (s, 3H, (CH<sub>3</sub>)<sub>2</sub>C), 1.33 (s, 3H, (CH<sub>3</sub>)<sub>2</sub>C), 1.32 (s, 3H, (CH<sub>3</sub>)<sub>2</sub>C); <sup>13</sup>C NMR (CDCl<sub>3</sub>, 125 MHz)  $\delta_C$  138.5 (Ar), 136.6 (Ar), 135.9 (Ar), 131.7 (Ar), 131.5 (Ar), 129.54 (Ar), 129.48 (Ar), 128.2 (2C, Ar), 127.7 (2C, Ar), 127.4 (Ar), 109.1 ((CH<sub>3</sub>)<sub>2</sub>C), 108.8 ((CH<sub>3</sub>)<sub>2</sub>C), 108.5 (C-2'), 96.3 (C-1), 87.1 (C-3'), 81.2 (C-4'), 73.6 (ArCH<sub>2</sub>), 71.0 (C-4), 70.7 (C-2), 70.6 (C-3), 69.6 (ArCH<sub>2</sub>), 69.2 (ArCH<sub>2</sub>), 69.1 (C-1'), 68.3 (C-5'), 67.3 (C-5), 60.9 (C-6), 26.1 ((CH<sub>3</sub>)<sub>2</sub>C), 26.0 ((CH<sub>3</sub>)<sub>2</sub>C), 25.0 ((CH<sub>3</sub>)<sub>2</sub>C), 24.4 ((CH<sub>3</sub>)<sub>2</sub>C); HRMS (ESI) calcd. for C<sub>32</sub>H<sub>40</sub>NaO<sub>10</sub> [M+Na]<sup>+</sup> 607.2514; found 607.2507. Data for **32b**:  $[\alpha]_D^{25} -14.6$  (*c* 0.4, CHCl<sub>3</sub>); *R<sub>f</sub>* 0.27 (2:1, hexane–EtOAc); <sup>1</sup>H NMR (CDCl<sub>3</sub>, 500 MHz)  $\delta_H$  7.44–7.35 (m, 4H, ArH), 7.33–7.25 (m, 3H, ArH), 7.24–7.21 (m, 2H, ArH), 5.39 (d, 1H, *J*<sub>1,2</sub> = 5.0 Hz, H-1), 5.01 (d, 1H, *J*<sub>gem</sub> = 12.8 Hz, ArCH<sub>2</sub>), 4.91 (d, 1H, *J*<sub>gem</sub> = 12.8 Hz, ArCH<sub>2</sub>), 4.83 (d, 1H, *J*<sub>gem</sub> =

12.8 Hz, ArCH<sub>2</sub>), 4.77 (d, 1H,  $J_{\text{gem}} = 12.8$  Hz, ArCH<sub>2</sub>), 4.58 (d, 1H,  $J_{\text{gem}} = 12.6$  Hz, ArCH<sub>2</sub>), 4.55 (dd, 1H,  $J_{3,2} = 2.2$  Hz,  $J_{3,4} = 7.9$  Hz, H-3), 4.51 (d, 1H,  $J_{\text{gem}} = 12.6$  Hz, ArCH<sub>2</sub>), 4.39–4.31 (m, 2H, H-4', H-5'a), 4.27 (dd, 1H,  $J_{2,1} = 5.0$  Hz,  $J_{2,3} = 2.2$  Hz, H-2), 4.22 (dd, 1H,  $J_{4,3} = 7.9$  Hz,  $J_{4,5} = 1.9$  Hz, H-4), 4.20 (d, 1H,  $J_{3',4'} = 4.8$  Hz, H-3'), 4.00 (ddd, 1H,  $J_{5,4} = 1.9$  Hz,  $J_{5,6a} = 5.9$  Hz,  $J_{5,6b} = 8.7$  Hz, H-5), 3.81 (app t, 1H,  $J_{6a,5} = J_{\text{gem}} = 8.7$  Hz, H-6a), 3.76 (dd, 1H,  $J_{5b',4'} = 3.1$  Hz,  $J_{\text{gem}} = 8.6$  Hz, H-5'b), 3.57 (s, 2H, H-1'a, H-1'b), 3.55 (dd, 1H,  $J_{6b,5} = 5.9$  Hz,  $J_{\text{gem}} = 8.7$  Hz, H-6b), 1.53 (s, 3H, (CH<sub>3</sub>)<sub>2</sub>C), 1.42 (s, 3H, (CH<sub>3</sub>)<sub>2</sub>C), 1.32 (s, 3H, (CH<sub>3</sub>)<sub>2</sub>C), 1.28 (s, 3H, (CH<sub>3</sub>)<sub>2</sub>C); <sup>13</sup>C NMR (CDCl<sub>3</sub>, 125 MHz)  $\delta_{\text{C}}$  138.0 (Ar), 136.4 (Ar), 136.3 (Ar), 131.5 (Ar), 131.4 (Ar), 129.4 (2C, Ar), 128.3 (2C, Ar), 127.7 (2C, Ar), 127.6 (Ar), 108.8 ((CH<sub>3</sub>)<sub>2</sub>C), 108.4 ((CH<sub>3</sub>)<sub>2</sub>C), 106.3 (C-2'), 96.1 (C-1), 83.3 (C-3'), 80.7 (C-4'), 73.4 (ArCH<sub>2</sub>), 70.8 (C-2), 70.7 (C-5'), 70.5 (C-4), 70.4 (C-3), 69.6 (ArCH<sub>2</sub>), 68.7 (ArCH<sub>2</sub>), 68.1 (C-1'), 66.2 (C-5), 59.8 (C-6), 26.1 ((CH<sub>3</sub>)<sub>2</sub>C), 26.0 ((CH<sub>3</sub>)<sub>2</sub>C), 24.9 ((CH<sub>3</sub>)<sub>2</sub>C), 24.4 ((CH<sub>3</sub>)<sub>2</sub>C); HRMS (ESI) calcd. for C<sub>32</sub>H<sub>40</sub>NaO<sub>10</sub> [M+Na]<sup>+</sup> 607.2514; found 607.2502.

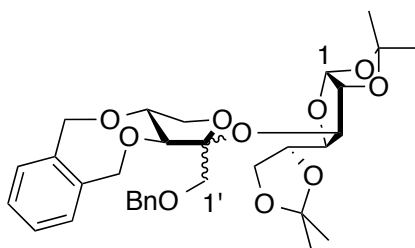

**1-O-benzyl-3,4-O-xylylidene- $\alpha$ -D-threo-pent-2-ulofuranosyl-(2 $\rightarrow$ 3)-1,2,5,6-di-O-isopropylidene- $\alpha$ -D-glucopyranose (33 $\alpha$ )** and **1-O-benzyl-3,4-O-xylylidene- $\beta$ -D-threo-pent-2-ulofuranosyl-(2 $\rightarrow$ 3)-1,2,3,4-di-O-isopropylidene- $\alpha$ -D-glucopyranose (33 $\beta$ )**. A mixture of the **7** (25.1 mg, 0.0560 mmol), **26** (17.5 mg, 0.0671 mmol), and 4Å molecular sieves in CH<sub>2</sub>Cl<sub>2</sub> (2.24 mL) was stirred under an Ar atmosphere at room

temperature for 30 min. The mixture was then cooled to  $-78\text{ }^{\circ}\text{C}$  and *N*-iodosuccinimide (15.1 mg, 0.0671 mmol) and silver triflate (1.4 mg, 5.60  $\mu\text{mol}$ ) were added. After stirring for 1 h at  $-78\text{ }^{\circ}\text{C}$ , triethylamine was added. The reaction was warmed to room temperature and then a small amount of water was added, followed by solid  $\text{Na}_2\text{S}_2\text{O}_3 \cdot 5\text{H}_2\text{O}$  until the solution was colorless. The solution was then dried over  $\text{MgSO}_4$ , filtered and the filtrate was concentrated under reduced pressure. The resulting residue was purified by column chromatography (8:1, hexane–EtOAc) to give **33a** (4.8 mg, 15%) and **33b** (21.1 mg, 65%) both as colorless oils. Data for **33a**:  $[\alpha]_{\text{D}}^{25} +35.1$  ( $c$  0.5,  $\text{CHCl}_3$ );  $R_f$  0.25 (4:1, hexane–EtOAc);  $^1\text{H NMR}$  ( $\text{CDCl}_3$ , 500 MHz)  $\delta_{\text{H}}$  7.42–7.27 (m, 9H, ArH), 5.82 (d, 1H,  $J_{1,2} = 3.7$  Hz, H-1), 4.95 (d, 1H,  $J_{\text{gem}} = 12.8$  Hz, ArCH<sub>2</sub>), 4.88 (d, 1H,  $J_{\text{gem}} = 12.8$  Hz, ArCH<sub>2</sub>), 4.76 (d, 2H,  $J_{\text{gem}} = 12.8$  Hz, ArCH<sub>2</sub>), 4.55 (d, 1H,  $J_{\text{gem}} = 11.7$  Hz, ArCH<sub>2</sub>), 4.52 (d, 1H,  $J_{\text{gem}} = 11.7$  Hz, ArCH<sub>2</sub>), 4.41 (d, 1H,  $J_{2,1} = 3.7$  Hz, H-2), 4.32–4.15 (m, 5H, H-3, H-4, H-5, H-4', H-5'a), 4.05 (d, 1H,  $J_{3,4'} = 5.9$  Hz, H-3'), 3.96–3.91 (m, 2H, H-6a, H-6b), 3.74 (dd, 1H,  $J = 8.0, 8.7$  Hz, H-5'b), 3.65 (d, 1H,  $J_{\text{gem}} = 10.8$  Hz, H-1'a), 3.54 (d, 1H,  $J_{\text{gem}} = 10.8$  Hz, H-1'b), 1.45 (s, 3H,  $(\text{CH}_3)_2\text{C}$ ), 1.35 (s, 3H,  $(\text{CH}_3)_2\text{C}$ ), 1.25 (s, 6H,  $(\text{CH}_3)_2\text{C}$ );  $^{13}\text{C NMR}$  ( $\text{CDCl}_3$ , 125 MHz)  $\delta_{\text{C}}$  138.4 (Ar), 136.3 (Ar), 136.0 (Ar), 131.5 (2C, Ar), 129.69 (Ar), 129.66 (Ar), 128.3 (2C, Ar), 127.63 (2C, Ar), 127.55 (Ar), 111.7 ( $(\text{CH}_3)_2\text{C}$ ), 110.0 (C-2'), 108.5 ( $(\text{CH}_3)_2\text{C}$ ), 105.1 (C-1), 86.6 (C-3'), 84.3 (C-2), 81.0 (C-4'), 80.5 (C-4), 75.9 (C-3), 73.7 (ArCH<sub>2</sub>), 73.1 (C-5), 69.7 (2C, C-1', C-5'), 69.5 (ArCH<sub>2</sub>), 68.9 (ArCH<sub>2</sub>), 66.2 (C-6), 26.9 ( $(\text{CH}_3)_2\text{C}$ ), 26.6 ( $(\text{CH}_3)_2\text{C}$ ), 26.4 ( $(\text{CH}_3)_2\text{C}$ ), 25.3 ( $(\text{CH}_3)_2\text{C}$ ); HRMS (ESI) calcd. for  $\text{C}_{32}\text{H}_{40}\text{NaO}_{10}$   $[\text{M}+\text{Na}]^+$  607.2514; found 607.2514. Data for **33b**:  $[\alpha]_{\text{D}}^{25} +1.9$  ( $c$  1.0,  $\text{CHCl}_3$ );  $R_f$  0.17 (4:1, hexane–EtOAc);  $^1\text{H NMR}$  ( $\text{CDCl}_3$ , 500 MHz)  $\delta_{\text{H}}$  7.43–7.26 (m, 7H, ArH), 7.24–

7.21 (m, 2H, ArH), 5.87 (d, 1H,  $J_{1,2} = 3.8$  Hz, H-1), 4.99 (d, 1H,  $J_{\text{gem}} = 12.6$  Hz, ArCH<sub>2</sub>), 4.87 (d, 1H,  $J_{\text{gem}} = 12.6$  Hz, ArCH<sub>2</sub>), 4.81 (d, 1H,  $J_{\text{gem}} = 12.6$  Hz, ArCH<sub>2</sub>), 4.77 (d, 1H,  $J_{\text{gem}} = 12.6$  Hz, ArCH<sub>2</sub>), 4.57 (d, 1H,  $J_{\text{gem}} = 12.3$  Hz, ArCH<sub>2</sub>), 4.53 (d, 1H,  $J_{\text{gem}} = 12.3$  Hz, ArCH<sub>2</sub>), 4.51 (d, 1H,  $J_{2,1} = 3.8$  Hz, H-2), 4.44 (dd, 1H,  $J_{5',4'} = 7.9$  Hz,  $J_{\text{gem}} = 9.0$  Hz, H-5'a), 4.41–4.35 (m, 1H, H-4'), 4.33 (d, 1H,  $J_{3,4} = 3.5$  Hz, H-3), 4.31–4.25 (m, 1H, H-5), 4.16 (d, 1H,  $J_{3',4'} = 5.5$  Hz, H-3'), 4.15 (dd, 1H,  $J_{4,3} = 3.5$  Hz,  $J_{4,5} = 7.4$  Hz, H-4), 4.04 (dd, 1H,  $J_{6a,5} = 6.2$  Hz,  $J_{\text{gem}} = 8.5$  Hz, H-6a), 3.96 (dd, 1H,  $J_{6b,5} = 6.6$  Hz,  $J_{\text{gem}} = 8.5$  Hz, H-6b), 3.72 (dd, 1H,  $J_{5'b,4'} = 4.8$  Hz,  $J_{\text{gem}} = 9.0$  Hz, H-5'b), 3.57 (d, 1H,  $J_{\text{gem}} = 10.6$  Hz, H-1'a), 3.46 (d, 1H,  $J_{\text{gem}} = 10.6$  Hz, H-1'b), 1.47 (s, 3H, (CH<sub>3</sub>)<sub>2</sub>C), 1.39 (s, 3H, (CH<sub>3</sub>)<sub>2</sub>C), 1.26 (s, 3H, (CH<sub>3</sub>)<sub>2</sub>C), 1.24 (s, 3H, (CH<sub>3</sub>)<sub>2</sub>C); <sup>13</sup>C NMR (CDCl<sub>3</sub>, 125 MHz)  $\delta_{\text{C}}$  137.8 (Ar), 136.5 (Ar), 136.2 (Ar), 131.5 (Ar), 131.4 (Ar), 129.59 (Ar), 129.55 (Ar), 128.4 (2C, Ar), 127.8 (Ar), 127.70 (2C, Ar), 111.4 ((CH<sub>3</sub>)<sub>2</sub>C), 108.9 ((CH<sub>3</sub>)<sub>2</sub>C), 107.2 (C-2'), 105.0 (C-1), 84.9 (C-2), 83.9 (C-3'), 81.2 (C-4), 80.7 (C-4'), 74.6 (C-3), 73.5 (ArCH<sub>2</sub>), 72.4 (C-5), 70.7 (C-5') 70.4 (C-1'), 69.4 (ArCH<sub>2</sub>), 69.1 (ArCH<sub>2</sub>), 67.3 (C-6), 26.9 ((CH<sub>3</sub>)<sub>2</sub>C), 26.7 ((CH<sub>3</sub>)<sub>2</sub>C), 26.4 ((CH<sub>3</sub>)<sub>2</sub>C), 25.5 ((CH<sub>3</sub>)<sub>2</sub>C); HRMS (ESI) calcd. for C<sub>32</sub>H<sub>40</sub>NaO<sub>10</sub> [M+Na]<sup>+</sup> 607.2514; found 607.2518.

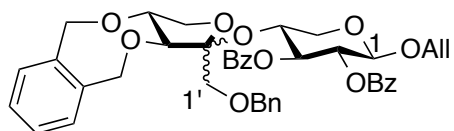

**Allyl 1-O-benzyl-3,4-O-xylylidene- $\alpha$ -D-threo-pent-2-ulofuranosyl-(2 $\rightarrow$ 4)-2,3-di-O-benzoyl- $\beta$ -D-xylopyranoside (34 $\alpha$ )** and **Allyl 1-O-benzyl-3,4-O-xylylidene- $\beta$ -D-threo-pent-2-ulofuranosyl-(2 $\rightarrow$ 4)-2,3-di-O-benzoyl- $\beta$ -D-xylopyranoside (34 $\beta$ )**. A mixture of **7** (24.0 mg, 0.0535 mmol), **27** (17.8 mg, 0.0446 mmol), and 4Å molecular

sieves in CH<sub>2</sub>Cl<sub>2</sub> (1.8 mL) was stirred under an Ar atmosphere at room temperature for 30 min. The mixture was then cooled to -78 °C and *N*-iodosuccinimide (14.4 mg, 0.0642 mmol) and silver triflate (1.4 mg, 5.35 μmol) were added. After stirring for 1 h at -78 °C, triethylamine was added. The reaction was warmed to room temperature and then a small amount of water was added, followed by solid Na<sub>2</sub>S<sub>2</sub>O<sub>3</sub>·5H<sub>2</sub>O until the solution was colorless. The solution was then dried over MgSO<sub>4</sub>, filtered and the filtrate was concentrated under reduced pressure. The resulting residue was purified by column chromatography (8:1, Hexane–EtOAc) to give **34a** (5.0 mg, 15%) as a colorless oil and **34b** (23.2 mg, 72%) as a colorless oil. Data for **34a**: [α]<sub>D</sub><sup>25</sup> +73.1 (*c* 0.5, CHCl<sub>3</sub>); R<sub>f</sub> 0.63 (2:1, Hexane–EtOAc); <sup>1</sup>H NMR (CDCl<sub>3</sub>, 700 MHz) δ<sub>H</sub> 7.97–7.95 (m, 2H, ArH), 7.94–7.92 (m, 2H, ArH), 7.52–7.48 (m, 2H, ArH), 7.39–7.33 (m, 6H, ArH), 7.32–7.30 (m, 1H, ArH), 7.28–7.26 (m, 1H, ArH), 7.25–7.21 (m, 3H, ArH), 7.16–7.13 (m, 2H, ArH), 5.83 (m, 1H, OCH<sub>2</sub>CH=CH<sub>2</sub>), 5.48 (app t, 1H, *J*<sub>3,2</sub> = *J*<sub>3,4</sub> = 8.1 Hz, H-3), 5.26 (dd, 1H, *J*<sub>2,1</sub> = 6.5 Hz, *J*<sub>2,3</sub> = 8.1 Hz, H-2), 5.23 (dq, 1H, *J* = 17.1, 1.6 Hz, OCH<sub>2</sub>CH=CH<sub>2</sub>), 5.12 (dq, 1H, *J* = 10.5, 1.6 Hz, OCH<sub>2</sub>CH=CH<sub>2</sub>), 4.85 (d, 1H, *J*<sub>gem</sub> = 12.7 Hz, ArCH<sub>2</sub>), 4.78 (d, 1H, *J*<sub>gem</sub> = 12.7 Hz, ArCH<sub>2</sub>), 4.70 (d, 1H, *J*<sub>gem</sub> = 12.7 Hz, ArCH<sub>2</sub>), 4.68 (d, 1H, *J*<sub>1,2</sub> = 6.5 Hz, H-1), 4.64 (d, 1H, *J*<sub>gem</sub> = 12.7 Hz, ArCH<sub>2</sub>), 4.33 (s, 2H, ArCH<sub>2</sub>), 4.29 (ddt, 1H, *J* = 13.0, 5.0, 1.4 Hz, OCH<sub>2</sub>CH=CH<sub>2</sub>), 4.24 (app dt, 1H, *J*<sub>4,5a</sub> = 4.9 Hz, *J*<sub>4,3</sub> = *J*<sub>4,5b</sub> = 8.1 Hz, H-4), 4.15–4.10 (m, 2H, H-5a, H-4'), 4.08 (ddt, 1H, *J* = 13.0, 6.1, 1.4 Hz, OCH<sub>2</sub>CH=CH<sub>2</sub>), 4.05 (app t, 1H, *J*<sub>5'a,4'</sub> = *J*<sub>gem</sub> = 8.0 Hz, H-5'a), 4.02 (d, 1H, *J*<sub>3',4'</sub> = 5.7 Hz, H-3'), 3.70 (app t, 1H, *J*<sub>5'b,4'</sub> = *J*<sub>gem</sub> = 8.0 Hz, H-5'b), 3.50 (d, 1H, *J*<sub>gem</sub> = 10.5 Hz, H-1'a), 3.44 (d, 1H, *J*<sub>gem</sub> = 10.5 Hz, H-1'b), 3.50 (dd, 1H, *J*<sub>5b,4</sub> = 8.1 Hz, *J*<sub>gem</sub> = 11.8 Hz, H-5b); <sup>13</sup>C NMR (CDCl<sub>3</sub>, 175 MHz) δ<sub>C</sub> 165.7 (C=O), 165.5



(C=O), 138.3 (Ar), 136.5 (Ar), 135.9 (Ar), 133.7 (OCH<sub>2</sub>CH=CH<sub>2</sub>), 132.99 (Ar), 132.98 (Ar), 131.6 (Ar), 131.5 (Ar), 129.90 (Ar), 129.87 (Ar), 129.8 (Ar), 129.7 (Ar), 129.6 (Ar), 129.5 (Ar), 128.3 (Ar), 128.2 (Ar), 127.6 (Ar), 127.4 (Ar), 117.5 (OCH<sub>2</sub>CH=CH<sub>2</sub>), 109.6 (C-2'), 99.5 (C-1), 88.2 (C-3'), 80.8 (C-4'), 73.4 (ArCH<sub>2</sub>), 72.4 (C-3), 71.3 (C-2), 69.6 (C-1'), 69.58 (OCH<sub>2</sub>CH=CH<sub>2</sub>), 69.44 (ArCH<sub>2</sub>), 69.35 (ArCH<sub>2</sub>), 68.92 (C-5'), 68.86 (C-4), 64.6 (C-5); HRMS (ESI) calcd. for C<sub>42</sub>H<sub>42</sub>NaO<sub>11</sub> [M+Na]<sup>+</sup> 745.2619; found 745.2623. Data for **34β**: [α]<sup>25</sup><sub>D</sub> +25.6 (c 2.3, CHCl<sub>3</sub>); R<sub>f</sub> 0.53 (2:1, Hexane–EtOAc); <sup>1</sup>H NMR (CDCl<sub>3</sub>, 700 MHz) δ<sub>H</sub> 7.94 (d, 2H, *J* = 8.1 Hz, ArH), 7.87 (d, 2H, *J* = 8.1 Hz, ArH), 7.50–7.45 (m, 2H, ArH), 7.39–7.32 (m, 6H, ArH), 7.31–7.27 (m, 4H, ArH), 7.22–7.20 (m, 1H, ArH), 7.20–7.17 (m, 2H, ArH), 5.82–5.76 (m, 1H, OCH<sub>2</sub>CH=CH<sub>2</sub>), 5.61 (app t, 1H, *J*<sub>3,2</sub> = *J*<sub>3,4</sub> = 8.8 Hz, H-3), 5.31 (dd, 1H, *J*<sub>2,1</sub> = 7.4 Hz, *J*<sub>2,3</sub> = 8.8 Hz, H-2), 5.22 (dq, 1H, *J* = 17.1, 1.6 Hz, OCH<sub>2</sub>CH=CH<sub>2</sub>), 5.12 (dq, 1H, *J* = 10.4, 1.6 Hz, OCH<sub>2</sub>CH=CH<sub>2</sub>), 4.84 (d, 1H, *J*<sub>gem</sub> = 12.7 Hz, ArCH<sub>2</sub>), 4.67 (d, 1H, *J*<sub>gem</sub> = 12.7 Hz, ArCH<sub>2</sub>), 4.66 (d, 1H, *J*<sub>gem</sub> = 12.7 Hz, ArCH<sub>2</sub>), 4.65 (d, 1H, *J*<sub>1,2</sub> = 7.4 Hz, H-1), 4.53 (d, 1H, *J*<sub>gem</sub> = 12.4 Hz, ArCH<sub>2</sub>), 4.51 (d, 1H, *J*<sub>gem</sub> = 12.7 Hz, ArCH<sub>2</sub>), 4.47 (d, 1H, *J*<sub>gem</sub> = 12.4 Hz, ArCH<sub>2</sub>), 4.29 (ddt, 1H, *J* = 13.6, 5.1, 1.6 Hz, OCH<sub>2</sub>CH=CH<sub>2</sub>), 4.24 (app dt, 1H, *J*<sub>4,3</sub> = 8.8 Hz, *J*<sub>4,5a</sub> = *J*<sub>4,5b</sub> = 5.1 Hz, H-4), 4.10–4.04 (m, 3H, H-5a, H-3', OCH<sub>2</sub>CH=CH<sub>2</sub>), 4.03–3.97 (m, 2H, H-5'a, H-4'), 3.54–3.47 (m, 3H, H-5b, H-1'a, H-5'b), 3.38 (d, 1H, *J*<sub>gem</sub> = 10.7 Hz, H-1'b); <sup>13</sup>C NMR (CDCl<sub>3</sub>, 175 MHz) δ<sub>C</sub> 165.6 (C=O), 165.4 (C=O), 137.7 (Ar), 136.5 (Ar), 136.0 (Ar), 133.6 (OCH<sub>2</sub>CH=CH<sub>2</sub>), 133.13 (Ar), 133.06 (Ar), 131.4 (Ar), 131.3 (Ar), 129.8 (Ar), 129.67 (Ar), 129.64 (Ar), 129.55 (Ar), 129.4 (Ar), 129.3 (Ar), 128.44 (Ar), 128.43 (Ar), 128.3 (Ar), 127.7 (Ar), 127.66 (Ar), 117.5 (OCH<sub>2</sub>CH=CH<sub>2</sub>), 106.8 (C-2'), 100.0 (C-1), 83.0 (C-3'), 80.2 (C-4'), 73.4

(ArCH<sub>2</sub>), 73.0 (C-3), 71.8 (C-2), 70.4 (C-5'), 70.1 (C-1'), 69.8 (OCH<sub>2</sub>CH=CH<sub>2</sub>), 69.3 (ArCH<sub>2</sub>), 69.0 (ArCH<sub>2</sub>), 67.8 (C-4), 65.3 (C-5); HRMS (ESI) calcd. for C<sub>42</sub>H<sub>42</sub>NaO<sub>11</sub> [M+Na]<sup>+</sup> 745.2626; found 745.2619.

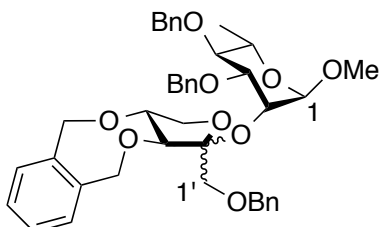

**Methyl 1-*O*-benzyl-3,4-*O*-xylylidene- $\alpha$ -D-*threo*-pent-2-ulofuranosyl-(2 $\rightarrow$ 2)-3,4-di-*O*-benzyl- $\alpha$ -L-rhamnopyranoside (35 $\alpha$ ) and Methyl 1-*O*-benzyl-3,4-*O*-xylylidene- $\beta$ -D-*threo*-pent-2-ulofuranosyl-(2 $\rightarrow$ 2)-3,4-di-*O*-benzyl- $\alpha$ -L-rhamnopyranoside (35 $\beta$ ).**

A mixture of **7** (21.8 mg, 0.0485 mmol), **28**<sup>3</sup> (14.5 mg, 0.0404 mmol), and 4Å molecular sieves in CH<sub>2</sub>Cl<sub>2</sub> (1.35 mL) was stirred under an Ar atmosphere at room temperature for 30 min. The mixture was then cooled to -78 °C and *N*-iodosuccinimide (13.1 mg, 0.0582 mmol) and silver triflate (1.2 mg, 4.85 μmol) were added. After stirring for 2 h at -78 °C, triethylamine was added. The reaction was warmed to room temperature and then a small amount of water was added, followed by solid Na<sub>2</sub>S<sub>2</sub>O<sub>3</sub>·5H<sub>2</sub>O until the solution was colorless. The solution was then dried over MgSO<sub>4</sub>, filtered and the filtrate was concentrated under reduced pressure. The resulting residue was purified by column chromatography (8:1, hexane–EtOAc) to give **35 $\alpha$**  (8.2 mg, 30%) and **35 $\beta$**  (16.5 mg, 60%) both as colorless oils. Data for **35 $\alpha$** : [ $\alpha$ ]<sub>D</sub><sup>25</sup> +36.4 (*c* 0.1, CHCl<sub>3</sub>); R<sub>f</sub> 0.27 (4:1, hexane–EtOAc); <sup>1</sup>H NMR (CDCl<sub>3</sub>, 500 MHz)  $\delta$ <sub>H</sub> 7.39–7.18 (m, 19H, ArH), 4.95 (d, 1H, *J*<sub>gem</sub> = 11.2 Hz, ArCH<sub>2</sub>), 4.89 (d, 1H, *J*<sub>gem</sub> = 12.3 Hz, ArCH<sub>2</sub>), 4.79 (d, 1H, *J*<sub>gem</sub> = 13.0 Hz, ArCH<sub>2</sub>), 4.71 (d, 1H, *J*<sub>gem</sub> = 12.3 Hz, ArCH<sub>2</sub>),

4.69 (d, 1H,  $J_{1,2} = 1.7$  Hz, H-1), 4.68 (d, 1H,  $J_{\text{gem}} = 12.1$  Hz, ArCH<sub>2</sub>), 4.64 (d, 1H,  $J_{\text{gem}} = 13.0$  Hz, ArCH<sub>2</sub>), 4.63 (d, 1H,  $J_{\text{gem}} = 11.2$  Hz, ArCH<sub>2</sub>), 4.55 (d, 1H,  $J_{\text{gem}} = 11.9$  Hz, ArCH<sub>2</sub>), 4.53 (d, 1H,  $J_{\text{gem}} = 11.9$  Hz, ArCH<sub>2</sub>), 4.52 (d, 1H,  $J_{\text{gem}} = 12.1$  Hz, ArCH<sub>2</sub>), 4.32 (dd, 1H,  $J_{2,1} = 1.7$  Hz,  $J_{2,3} = 3.2$  Hz, H-2), 4.21 (d, 1H,  $J_{3',4'} = 5.5$  Hz, H-3'), 4.09–4.04 (m, 1H, H-4'), 4.00 (app t, 1H,  $J_{5'a,4'} = J_{\text{gem}} = 8.5$  Hz, H-5'a), 3.88 (app t, 1H,  $J_{5'b,4'} = J_{\text{gem}} = 8.5$  Hz, H-5'b), 3.76 (dd, 1H,  $J_{3,2} = 3.2$  Hz,  $J_{3,4} = 9.6$  Hz, H-3), 3.67 (d, 1H,  $J_{\text{gem}} = 10.8$  Hz, H-1'a), 3.64–3.58 (m, 1H, H-5), 3.56 (d, 1H,  $J_{\text{gem}} = 10.8$  Hz, H-1'b), 3.48 (app t, 1H,  $J_{4,3} = J_{4,5} = 9.6$  Hz, H-4), 3.22 (s, 3H, OCH<sub>3</sub>), 1.28 (d, 3H,  $J_{6,5} = 6.3$  Hz, H-6); <sup>13</sup>C NMR (CDCl<sub>3</sub>, 125 MHz)  $\delta_{\text{C}}$  138.8 (Ar), 138.4 (Ar), 137.1 (Ar), 135.7 (Ar), 131.6 (Ar), 131.5 (Ar), 129.5 (Ar), 129.4 (Ar), 128.33 (Ar), 128.26 (Ar), 128.1 (Ar), 127.8 (Ar), 127.7 (Ar), 127.5 (Ar), 127.3 (Ar), 109.3 (C-2'), 101.0 (C-1,  $J_{\text{C1,H1}} = 171.8$  Hz), 88.1 (C-3'), 80.3 (C-4'), 79.8 (C-4), 79.1 (C-3), 75.1 (ArCH<sub>2</sub>), 73.9 (ArCH<sub>2</sub>), 71.8 (ArCH<sub>2</sub>), 71.3 (C-1'), 69.44 (C-2), 69.35 (ArCH<sub>2</sub>), 69.2 (ArCH<sub>2</sub>), 68.9 (C-5'), 67.9 (C-5), 54.7 (OCH<sub>3</sub>), 18.1 (C-6); HRMS (ESI) calcd. for C<sub>41</sub>H<sub>46</sub>NaO<sub>9</sub> [M+Na]<sup>+</sup> 705.3034; found 705.3021. Data for **35β**: [ $\alpha$ ]<sup>25</sup><sub>D</sub> +12.2 (*c* 0.3, CHCl<sub>3</sub>); R<sub>f</sub> 0.14 (4:1, hexane–EtOAc); <sup>1</sup>H NMR (CDCl<sub>3</sub>, 500 MHz)  $\delta_{\text{H}}$  7.40–7.24 (m, 17H, ArH), 7.15–7.11 (m, 2H, ArH), 5.04 (d, 1H,  $J_{\text{gem}} = 13.3$  Hz, ArCH<sub>2</sub>), 4.89 (d, 1H,  $J_{\text{gem}} = 13.0$  Hz, ArCH<sub>2</sub>), 4.87 (d, 1H,  $J_{\text{gem}} = 11.2$  Hz, ArCH<sub>2</sub>), 4.82 (d, 1H,  $J_{\text{gem}} = 13.0$  Hz, ArCH<sub>2</sub>), 4.80 (d, 1H,  $J_{\text{gem}} = 13.3$  Hz, ArCH<sub>2</sub>), 4.64–4.58 (m, 3H, H-1, ArCH<sub>2</sub>), 4.58 (d, 1H,  $J_{\text{gem}} = 11.2$  Hz, ArCH<sub>2</sub>), 4.47 (d, 1H,  $J_{\text{gem}} = 12.1$  Hz, ArCH<sub>2</sub>), 4.46–4.43 (m, 1H, H-4'), 4.31 (d, 1H,  $J_{\text{gem}} = 12.1$  Hz, ArCH<sub>2</sub>), 4.27 (d, 1H,  $J_{3',4'} = 6.5$  Hz, H-3'), 4.22 (dd, 1H,  $J_{5'a,4'} = 8.1$  Hz,  $J_{\text{gem}} = 9.4$  Hz, H-5'a), 4.09 (dd, 1H,  $J_{2,1} = 1.7$  Hz,  $J_{2,3} = 3.0$  Hz, H-2), 3.79 (dd, 1H,  $J_{5'b,4} = 5.6$  Hz,  $J_{\text{gem}} = 9.4$  Hz, H-5'b), 3.76 (dd, 1H,  $J_{3,2} = 3.0$  Hz,  $J_{3,4} = 9.1$  Hz, H-3),

3.65–3.58 (m, 1H, H-5), 3.55 (s, 2H, H-1'a, H-1'b), 3.49 (app t, 1H,  $J_{4,3} = J_{4,5} = 9.1$  Hz, H-4), 3.27 (s, 3H, OCH<sub>3</sub>), 1.26 (d, 3H,  $J_{6,5} = 6.1$  Hz, H-6); <sup>13</sup>C NMR (CDCl<sub>3</sub>, 125 MHz)  $\delta_c$  138.8 (Ar), 138.7 (Ar), 138.2 (Ar), 136.8 (Ar), 136.6 (Ar), 131.6 (Ar), 131.1 (Ar), 129.3 (Ar), 129.2 (Ar), 128.34 (Ar), 128.32 (Ar), 128.0 (Ar), 127.9 (Ar), 127.59 (Ar), 127.57 (Ar), 127.51 (Ar), 127.48 (Ar), 107.2 (C-2'), 100.3 (C-1,  $J_{C1,H1} = 172.1$  Hz), 82.2 (C-3'), 80.4 (C-4), 79.8 (C-4'), 78.9 (C-3), 74.9 (ArCH<sub>2</sub>), 73.3 (ArCH<sub>2</sub>), 72.4 (ArCH<sub>2</sub>), 70.5 (C-5'), 69.6 (C-2), 69.5 (ArCH<sub>2</sub>), 69.2 (ArCH<sub>2</sub>), 69.0 (C-1'), 67.9 (C-5), 54.7 (OCH<sub>3</sub>), 18.1 (C-6); HRMS (ESI) calcd. for C<sub>41</sub>H<sub>46</sub>NaO<sub>9</sub> [M+Na]<sup>+</sup> 705.3034; found 705.3026.

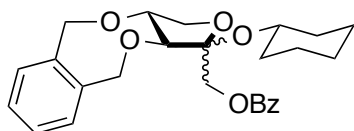

**Cyclohexyl 1-O-benzoyl-3,4-O-xylylidene- $\alpha$ -D-threo-pent-2-ulofuranoside (36 $\alpha$ )**  
 and **Cyclohexyl 1-O-benzoyl-3,4-O-xylylidene- $\beta$ -D-threo-pent-2-ulofuranoside (36 $\beta$ )**. A mixture of **8** (48 mg, 0.104 mmol), **22** (12.5 mg, 13.0  $\mu$ L, 0.125 mmol), and 4Å molecular sieves in CH<sub>2</sub>Cl<sub>2</sub> (4.2 mL) was stirred under an Ar atmosphere at room temperature for 30 min. The mixture was then cooled to –78 °C and *N*-iodosuccinimide (28.0 mg, 0.125 mmol) and silver triflate (2.7 mg, 10.4  $\mu$ mol) were added. After stirring for 4 h at –78 °C, triethylamine was added. The reaction was warmed to room temperature and then a small amount of water was added, followed by solid Na<sub>2</sub>S<sub>2</sub>O<sub>3</sub>·5H<sub>2</sub>O until the solution was colorless. The solution was then dried over MgSO<sub>4</sub>, filtered and the filtrate was concentrated under reduced pressure. The resulting residue was purified by column chromatography (9:1, hexane–EtOAc) to give **36 $\alpha$**

(13.7 mg, 29%) as a colorless oil and **36 $\beta$**  (27.3 mg, 58%) as a colorless oil. Data for **36 $\alpha$** :  $[\alpha]_D^{25} +17.8$  (*c* 0.4, CHCl<sub>3</sub>); *R<sub>f</sub>* 0.29 (9:1, hexane–EtOAc); <sup>1</sup>H NMR (CDCl<sub>3</sub>, 500 MHz)  $\delta_H$  7.97–7.94 (m, 2H, Ar), 7.57–7.52 (m, 1H, Ar), 7.42–7.30 (m, 5H, Ar), 7.25–7.23 (m, 1H, Ar), 4.94 (d, 1H,  $J_{gem} = 12.4$  Hz, ArCH<sub>2</sub>), 4.84 (d, 1H,  $J_{gem} = 12.4$  Hz, ArCH<sub>2</sub>), 4.76 (d, 1H,  $J_{gem} = 12.4$  Hz, ArCH<sub>2</sub>), 4.73 (d, 1H,  $J_{gem} = 12.4$  Hz, ArCH<sub>2</sub>), 4.45 (d, 1H,  $J_{gem} = 11.8$  Hz, H-1a), 4.41 (d, 1H,  $J_{gem} = 11.8$  Hz, H-1b), 4.17 (ddd, 1H,  $J_{4,3} = 5.5$  Hz,  $J_{4,5a} = 7.7$  Hz,  $J_{4,5b} = 8.8$  Hz, H-4), 4.10 (d, 1H,  $J_{3,4} = 5.5$  Hz, H-3), 4.06 (dd, 1H,  $J_{5a,4} = 7.7$  Hz,  $J_{gem} = 8.8$  Hz, H-5a), 3.80 (app t, 1H,  $J_{5b,4} = J_{gem} = 8.8$  Hz, H-5b), 3.76–3.69 (m, 1H, cyclohexyl OCH), 1.80–1.64 (m, 4H, cyclohexyl CH<sub>2</sub>), 1.52–1.46 (m, 1H, cyclohexyl CH<sub>2</sub>), 1.36–1.19 (m, 1H, cyclohexyl CH<sub>2</sub>); <sup>13</sup>C NMR (CDCl<sub>3</sub>, 125 MHz)  $\delta_C$  166.1 (C=O), 136.7 (Ar), 136.0 (Ar), 133.0 (Ar), 131.8 (Ar), 131.6 (Ar), 130.6 (Ar), 129.83 (2C, Ar), 129.77 (Ar), 129.67 (Ar), 128.5 (2C, Ar), 108.6 (C-2), 88.3 (C-3), 81.1 (C-4), 71.2 (cyclohexyl OCH), 69.7 (ArCH<sub>2</sub>), 68.9 (ArCH<sub>2</sub>), 68.5 (C-5), 62.8 (C-1), 35.0 (cyclohexyl CH<sub>2</sub>), 34.4 (cyclohexyl CH<sub>2</sub>), 25.5 (cyclohexyl CH<sub>2</sub>), 24.65 (cyclohexyl CH<sub>2</sub>), 24.63 (cyclohexyl CH<sub>2</sub>); HRMS (ESI) calcd. for C<sub>26</sub>H<sub>30</sub>NaO<sub>6</sub> [M+Na]<sup>+</sup> 461.1935; found 461.1940. Data for **36 $\beta$** :  $[\alpha]_D^{25} +12.9$  (*c* 0.9, CHCl<sub>3</sub>); *R<sub>f</sub>* 0.19 (9:1, hexane–EtOAc); <sup>1</sup>H NMR (CDCl<sub>3</sub>, 500 MHz)  $\delta_H$  7.89–7.84 (m, 2H, Ar), 7.58–7.53 (m, 1H, Ar), 7.43–7.37 (m, 2H, Ar), 7.37–7.30 (m, 3H, Ar), 7.28–7.25 (m, 1H, Ar), 5.06 (d, 1H,  $J_{gem} = 12.9$  Hz, ArCH<sub>2</sub>), 4.85–4.77 (m, 3H, ArCH<sub>2</sub>), 4.61 (d, 1H,  $J_{gem} = 11.8$  Hz, H-1a), 4.47 (ddd, 1H,  $J_{4,3} = 5.1$  Hz,  $J_{4,5a} = 7.7$  Hz,  $J_{4,5b} = 3.8$  Hz, H-4), 4.26 (dd, 1H,  $J_{5a,4} = 7.7$  Hz,  $J_{gem} = 9.8$  Hz, H-5a), 4.21 (d, 1H,  $J_{gem} = 11.8$  Hz, H-1b), 4.11 (d, 1H,  $J_{3,4} = 5.1$  Hz, H-3), 3.81–3.76 (m, 1H, cyclohexyl OCH), 3.76 (dd, 1H,  $J_{5b,4} = 3.8$  Hz,  $J_{gem} = 9.8$  Hz, H-5b), 1.86–1.70 (m, 4H, cyclohexyl CH<sub>2</sub>), 1.59–1.36 (m, 4H,

cyclohexyl CH<sub>2</sub>), 1.30–1.20 (m, 2H, cyclohexyl CH<sub>2</sub>); <sup>13</sup>C NMR (CDCl<sub>3</sub>, 125 MHz) δ<sub>C</sub> 165.9 (C=O), 137.0 (Ar), 135.7 (Ar), 133.2 (Ar), 131.7 (Ar), 131.6 (Ar), 130.0 (Ar), 129.9 (2C, Ar), 129.57 (Ar), 129.55 (Ar), 128.5 (2C, Ar) 105.4 (C-2), 83.5 (C-3), 81.3 (C-4), 71.0 (2C, cyclohexyl OCH, C-5), 69.7 (ArCH<sub>2</sub>), 69.1 (ArCH<sub>2</sub>), 62.8 (C-1), 34.6 (cyclohexyl CH<sub>2</sub>), 34.5 (cyclohexyl CH<sub>2</sub>), 25.4 (cyclohexyl CH<sub>2</sub>), 25.1 (cyclohexyl CH<sub>2</sub>), 25.0 (cyclohexyl CH<sub>2</sub>); HRMS (ESI) calcd. for C<sub>26</sub>H<sub>30</sub>NaO<sub>6</sub> [M+Na]<sup>+</sup> 461.1935; found 461.1930.

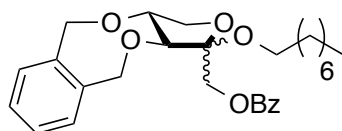

**Octyl 1-O-benzoyl-3,4-O-xylylidene- $\alpha$ -D-threo-pent-2-ulofuranoside** (**37 $\alpha$** ) and **Octyl 1-O-benzoyl-3,4-O-xylylidene- $\beta$ -D-threo-pent-2-ulofuranoside** (**37 $\beta$** ). A mixture of the **8** (19.9 mg, 0.0430 mmol), **23** (6.7 mg, 0.0516 mmol), and 4Å molecular sieves in CH<sub>2</sub>Cl<sub>2</sub> (1.72 mL) was stirred under an Ar atmosphere at room temperature for 30 min. The mixture was then cooled to –78 °C and *N*-iodosuccinimide (11.6 mg, 0.0516 mmol) and silver triflate (1.1 mg, 4.30  $\mu$ mol) were added. After stirring for 1 h at –78 °C, triethylamine was added. The reaction was warmed to room temperature and then a small amount of water was added, followed by solid Na<sub>2</sub>S<sub>2</sub>O<sub>3</sub>·5H<sub>2</sub>O until the solution was colorless. The solution was then dried over MgSO<sub>4</sub>, filtered and the filtrate was concentrated under reduced pressure. The resulting residue was purified by column chromatography (15:1, hexane–EtOAc) to give **37 $\alpha$**  (4.5 mg, 23%) and **37 $\beta$**  (13.3 mg, 68%) both as colorless oils. Data for **37 $\alpha$** : [ $\alpha$ ]<sub>D</sub><sup>25</sup> +62.9 (*c* 0.5, CHCl<sub>3</sub>); R<sub>f</sub> 0.14 (15:1, hexane–EtOAc); <sup>1</sup>H NMR (CDCl<sub>3</sub>, 500 MHz) δ<sub>H</sub> 7.99–7.95 (m, 2H, ArH), 7.58–7.52

(m, 1H, ArH), 7.44–7.32 (m, 5H, ArH), 7.29–7.26 (m, 1H, ArH), 4.95 (d, 1H,  $J_{\text{gem}} = 12.7$  Hz, ArCH<sub>2</sub>), 4.87 (d, 1H,  $J_{\text{gem}} = 12.7$  Hz, ArCH<sub>2</sub>), 4.77 (d, 1H,  $J_{\text{gem}} = 12.7$  Hz, ArCH<sub>2</sub>), 4.74 (d, 1H,  $J_{\text{gem}} = 12.7$  Hz, ArCH<sub>2</sub>), 4.47 (d, 1H,  $J_{\text{gem}} = 11.7$  Hz, H-1a), 4.40 (d, 1H,  $J_{\text{gem}} = 11.7$  Hz, H-1b), 4.18 (ddd, 1H,  $J_{4,3} = 5.3$  Hz,  $J_{4,5a} = 7.8$  Hz,  $J_{4,5b} = 8.8$  Hz, H-4), 4.11 (d, 1H,  $J_{3,4} = 5.3$  Hz, H-3), 4.07 (dd, 1H,  $J_{5a,4} = 7.8$  Hz,  $J_{\text{gem}} = 8.8$  Hz, H-5a), 3.74 (app t, 1H,  $J_{5b,4} = J_{\text{gem}} = 8.8$  Hz, H-5b), 3.55 (app dt, 1H,  $J = 6.8, 9.2$  Hz, octyl OCH<sub>2</sub>), 3.48 (app dt, 1H,  $J = 6.8, 9.2$  Hz, octyl OCH<sub>2</sub>), 1.56–1.47 (m, 2H, octyl CH<sub>2</sub>), 1.33–1.18 (m, 10H, octyl CH<sub>2</sub>), 0.86 (t, 3H,  $J = 7.2$  Hz, octyl CH<sub>3</sub>); <sup>13</sup>C NMR (CDCl<sub>3</sub>, 125 MHz)  $\delta_{\text{C}}$  166.1 (C=O), 136.5 (Ar), 135.9 (Ar), 132.9 (Ar), 131.7 (Ar), 131.5 (Ar), 130.4 (Ar), 129.72 (2C, Ar), 129.68 (Ar), 129.58 (Ar), 128.4 (2C, Ar), 107.9 (C-2), 87.6 (C-3), 81.1 (C-4), 69.8 (ArCH<sub>2</sub>), 68.9 (ArCH<sub>2</sub>), 68.3 (C-5), 62.1 (C-1), 61.8 (octyl OCH<sub>2</sub>), 31.9 (octyl CH<sub>2</sub>), 30.1 (octyl CH<sub>2</sub>), 29.4 (octyl CH<sub>2</sub>), 29.3 (octyl CH<sub>2</sub>), 26.2 (octyl CH<sub>2</sub>), 22.7 (octyl CH<sub>2</sub>), 14.1 (octyl CH<sub>3</sub>); HRMS (ESI) calcd. for C<sub>28</sub>H<sub>36</sub>NaO<sub>6</sub> [M+Na]<sup>+</sup> 491.2404; found 491.2412. Data for **37 $\beta$** : [ $\alpha$ ]<sup>25</sup><sub>D</sub> +21.4 (*c* 1.3, CHCl<sub>3</sub>); R<sub>f</sub> 0.09 (15:1, hexane–EtOAc); <sup>1</sup>H NMR (CDCl<sub>3</sub>, 500 MHz)  $\delta_{\text{H}}$  7.92–7.87 (m, 2H, ArH), 7.58–7.53 (m, 1H, ArH), 7.44–7.29 (m, 6H, ArH), 5.03 (d, 1H,  $J_{\text{gem}} = 12.7$  Hz, ArCH<sub>2</sub>), 4.88 (d, 1H,  $J_{\text{gem}} = 12.7$  Hz, ArCH<sub>2</sub>), 4.82 (d, 1H,  $J_{\text{gem}} = 12.7$  Hz, ArCH<sub>2</sub>), 4.78 (d, 1H,  $J_{\text{gem}} = 12.7$  Hz, ArCH<sub>2</sub>), 4.59 (d, 1H,  $J_{\text{gem}} = 11.8$  Hz, H-1a), 4.39 (ddd, 1H,  $J_{4,3} = 4.9$  Hz,  $J_{4,5a} = 7.5$  Hz,  $J_{4,5b} = 3.7$  Hz, H-4), 4.30 (d, 1H,  $J_{\text{gem}} = 11.8$  Hz, H-1b), 4.18 (dd, 1H,  $J_{5a,4} = 7.5$  Hz,  $J_{\text{gem}} = 9.9$  Hz, H-5a), 4.14 (d, 1H,  $J_{3,4} = 4.9$  Hz, H-3), 3.78 (dd, 1H,  $J_{5b,4} = 3.7$  Hz,  $J_{\text{gem}} = 9.9$  Hz, H-5b), 3.62 (app dt, 1H,  $J = 7.5, 9.2$  Hz, octyl OCH<sub>2</sub>), 3.54 (app dt, 1H,  $J = 6.6, 9.2$  Hz, octyl OCH<sub>2</sub>), 1.65–1.54 (m, 2H, octyl CH<sub>2</sub>), 1.35–1.18 (m, 10H, octyl CH<sub>2</sub>), 0.87 (t, 3H,  $J = 7.2$  Hz, octyl CH<sub>3</sub>); <sup>13</sup>C NMR (CDCl<sub>3</sub>, 125 MHz)  $\delta_{\text{C}}$

165.9 (C=O), 136.6 (Ar), 135.8 (Ar), 133.1 (Ar), 131.6 (Ar), 131.4 (Ar), 129.9 (Ar), 129.8 (2C, Ar), 129.5 (2C, Ar), 128.4 (2C, Ar), 105.1 (C-2), 83.7 (C-3), 81.0 (C-4), 71.0 (C-5), 69.7 (ArCH<sub>2</sub>), 68.9 (ArCH<sub>2</sub>), 62.4 (C-1), 62.0 (octyl OCH<sub>2</sub>), 31.9 (octyl CH<sub>2</sub>), 30.1 (octyl CH<sub>2</sub>), 29.4 (octyl CH<sub>2</sub>), 29.3 (octyl CH<sub>2</sub>), 26.1 (octyl CH<sub>2</sub>), 22.7 (octyl CH<sub>2</sub>), 14.1 (octyl CH<sub>3</sub>); HRMS (ESI) calcd. for C<sub>28</sub>H<sub>38</sub>NaO<sub>5</sub> [M+Na]<sup>+</sup> 491.2404; found 491.2411.

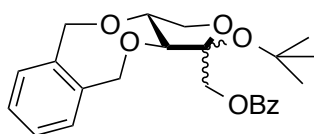

***tert*-Butyl 1-*O*-benzoyl-3,4-*O*-xylylidene- $\alpha$ -D-*threo*-pent-2-ulofuranoside (38 $\alpha$ )**

and ***tert*-Butyl 1-*O*-benzoyl-3,4-*O*-xylylidene- $\beta$ -D-*threo*-pent-2-ulofuranoside (38 $\beta$ )**.

A mixture of **8** (23.2 mg, 0.0502 mmol), **24** (4.5 mg, 0.0602 mmol), and 4Å molecular sieves in CH<sub>2</sub>Cl<sub>2</sub> (2.01 mL) was stirred under an Ar atmosphere at room temperature for 30 min. The mixture was then cooled to -78 °C and *N*-iodosuccinimide (13.5 mg, 0.0602 mmol) and silver triflate (1.3 mg, 5.02 μmol) were added. After stirring for 6 h at -78 °C, triethylamine was added. The reaction was warmed to room temperature and then a small amount of water was added, followed by solid Na<sub>2</sub>S<sub>2</sub>O<sub>3</sub>·5H<sub>2</sub>O until the solution was colorless. The solution was then dried over MgSO<sub>4</sub>, filtered and the filtrate was concentrated under reduced pressure. The resulting residue was purified by column chromatography (10:1, hexane–EtOAc) to give **38 $\alpha$**  (6.6 mg, 32%) and **38 $\beta$**  (11.9 mg, 58%) both as colorless oils. Data for **38 $\alpha$** : [ $\alpha$ ]<sub>D</sub><sup>25</sup> +36.8 (*c* 0.7, CHCl<sub>3</sub>); R<sub>f</sub> 0.51 (4:1, hexane–EtOAc); <sup>1</sup>H NMR (CDCl<sub>3</sub>, 500 MHz)  $\delta$ <sub>H</sub> 7.90–7.86 (m, 2H, ArH), 7.56–7.50 (m, 1H, ArH), 7.40–7.34 (m, 3H, ArH), 7.33–7.29 (m,



2H, ArH), 7.27–7.24 (m, 1H, ArH), 4.97 (d, 1H,  $J_{\text{gem}} = 12.8$  Hz, ArCH<sub>2</sub>), 4.83 (d, 1H,  $J_{\text{gem}} = 12.8$  Hz, ArCH<sub>2</sub>), 4.75 (d, 1H,  $J_{\text{gem}} = 12.8$  Hz, ArCH<sub>2</sub>), 4.74 (d, 1H,  $J_{\text{gem}} = 12.8$  Hz, ArCH<sub>2</sub>), 4.49 (d, 1H,  $J_{\text{gem}} = 11.2$  Hz, H-1a), 4.37 (d, 1H,  $J_{\text{gem}} = 11.2$  Hz, H-1b), 4.21–4.13 (m, 2H, H-3, H-4), 4.07 (dd, 1H,  $J_{5a,4} = 7.6$  Hz,  $J_{\text{gem}} = 8.2$  Hz, H-5a), 3.83 (app t, 1H,  $J_{5b,4} = J_{\text{gem}} = 8.2$  Hz, H-5b), 1.32 (s, 9H, (CH<sub>3</sub>)<sub>3</sub>C); <sup>13</sup>C NMR (CDCl<sub>3</sub>, 125 MHz)  $\delta_{\text{C}}$  166.0 (C=O), 136.8 (Ar), 135.8 (Ar), 132.7 (Ar), 131.6 (Ar), 131.3 (Ar), 130.5 (Ar), 129.6 (2C, Ar), 129.5 (Ar), 129.4 (Ar), 128.3 (2C, Ar), 109.5 (C-2), 90.4 (C-3), 80.0 (C-4), 76.4 ((CH<sub>3</sub>)<sub>3</sub>C), 69.4 (ArCH<sub>2</sub>), 69.1 (ArCH<sub>2</sub>), 68.7 (C-5), 64.8 (C-1), 30.9 (3C, (CH<sub>3</sub>)<sub>3</sub>C); HRMS (ESI) calcd. for C<sub>24</sub>H<sub>28</sub>NaO<sub>6</sub> [M+Na]<sup>+</sup> 435.1778; found 435.1782. Data for **38β**:  $[\alpha]_{\text{D}}^{25} +20.2$  (*c* 1.2, CHCl<sub>3</sub>); R<sub>f</sub> 0.29 (4:1, hexane–EtOAc); <sup>1</sup>H NMR (CDCl<sub>3</sub>, 500 MHz)  $\delta_{\text{H}}$  7.86–7.81 (m, 2H, ArH), 7.57–7.52 (m, 1H, ArH), 7.41–7.28 (m, 5H, ArH), 7.26–7.23 (m, 1H, ArH), 5.08 (d, 1H,  $J_{\text{gem}} = 12.9$  Hz, ArCH<sub>2</sub>), 4.84 (d, 1H,  $J_{\text{gem}} = 12.9$  Hz, ArCH<sub>2</sub>), 4.81 (d, 1H,  $J_{\text{gem}} = 12.9$  Hz, ArCH<sub>2</sub>), 4.80 (d, 1H,  $J_{\text{gem}} = 12.9$  Hz, ArCH<sub>2</sub>), 4.79 (d, 1H,  $J_{\text{gem}} = 11.6$  Hz, H-1a), 4.42 (ddd, 1H,  $J_{4,3} = 5.8$  Hz,  $J_{4,5a} = 7.5$  Hz,  $J_{4,5b} = 4.3$  Hz, H-4), 4.27 (d, 1H,  $J_{\text{gem}} = 11.6$  Hz, H-1a), 4.25 (dd, 1H,  $J_{5a,4} = 7.5$  Hz,  $J_{\text{gem}} = 9.6$  Hz, H-5a), 4.08 (d, 1H,  $J_{3,4} = 5.8$  Hz, H-3), 3.72 (dd, 1H,  $J_{5b,4} = 4.3$  Hz,  $J_{\text{gem}} = 9.6$  Hz, H-5b), 1.37 (s, 9H, (CH<sub>3</sub>)<sub>3</sub>C); <sup>13</sup>C NMR (CDCl<sub>3</sub>, 125 MHz)  $\delta_{\text{C}}$  165.9 (C=O), 137.0 (Ar), 136.0 (Ar), 133.0 (Ar), 131.5 (Ar), 131.1 (Ar), 129.9 (Ar), 129.7 (2C, Ar), 129.3 (Ar), 129.2 (Ar), 128.4 (2C, Ar), 106.0 (C-2), 83.8 (C-3), 81.0 (C-4), 76.2 ((CH<sub>3</sub>)<sub>3</sub>C), 70.2 (C-5), 69.8 (ArCH<sub>2</sub>), 69.2 (ArCH<sub>2</sub>), 64.0 (C-1), 31.0 (3C, (CH<sub>3</sub>)<sub>3</sub>C); HRMS (ESI) calcd. for C<sub>24</sub>H<sub>28</sub>NaO<sub>6</sub> [M+Na]<sup>+</sup> 435.1780; found 435.1778.

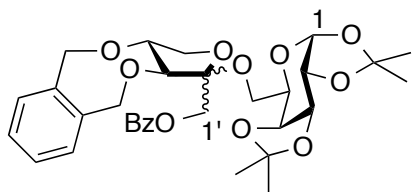

**1-O-benzoyl-3,4-O-xylylidene- $\alpha$ -D-threo-pent-2-ulofuranosyl-(2 $\rightarrow$ 6)-1,2,3,4-di-O-isopropylidene- $\alpha$ -D-galactopyranose (39 $\alpha$ ) and 1-O-benzoyl-3,4-O-xylylidene- $\beta$ -D-threo-pent-2-ulofuranosyl-(2 $\rightarrow$ 6)-1,2,3,4-di-O-isopropylidene- $\alpha$ -D-galactopyranose (39 $\beta$ ).** A mixture of **8** (22.1 mg, 0.0478 mmol), **25** (14.9 mg, 0.0573 mmol), and 4Å molecular sieves in CH<sub>2</sub>Cl<sub>2</sub> (1.91 mL) was stirred under an Ar atmosphere at room temperature for 30 min. The mixture was then cooled to -78 °C and *N*-iodosuccinimide (12.9 mg, 0.0573 mmol) and silver triflate (1.2 mg, 4.78  $\mu$ mol) were added. After stirring for 1 h at -78 °C, triethylamine was added. The reaction was warmed to room temperature and then a small amount of water was added, followed by solid Na<sub>2</sub>S<sub>2</sub>O<sub>3</sub>·5H<sub>2</sub>O until the solution was colorless. The solution was then dried over MgSO<sub>4</sub>, filtered and the filtrate was concentrated under reduced pressure. The resulting residue was purified by column chromatography (10:1, hexane–EtOAc) to give **39 $\alpha$**  (6.0 mg, 21%) and **39 $\beta$**  (21.6 mg, 76%) both as colorless oils. Data for **39 $\alpha$** :  $[\alpha]_D^{25} +10.0$  (*c* 0.6, CHCl<sub>3</sub>); *R<sub>f</sub>* 0.47 (2:1, hexane–EtOAc); <sup>1</sup>H NMR (CDCl<sub>3</sub>, 500 MHz)  $\delta_H$  8.00–7.95 (m, 2H, ArH), 7.56–7.51 (m, 1H, ArH), 7.43–7.31 (m, 5H, ArH), 7.26–7.23 (m, 1H, ArH), 5.49 (d, 1H, *J*<sub>1,2</sub> = 5.0 Hz, H-1), 4.95 (d, 1H, *J*<sub>gem</sub> = 12.6 Hz, ArCH<sub>2</sub>), 4.85 (d, 1H, *J*<sub>gem</sub> = 12.6 Hz, ArCH<sub>2</sub>), 4.76 (d, 1H, *J*<sub>gem</sub> = 12.6 Hz, ArCH<sub>2</sub>), 4.73 (d, 1H, *J*<sub>gem</sub> = 12.6 Hz, ArCH<sub>2</sub>), 4.54 (dd, 1H, *J*<sub>3,2</sub> = 2.5 Hz, *J*<sub>3,4</sub> = 8.0 Hz, H-3), 4.49 (d, 1H, *J*<sub>gem</sub> = 11.8 Hz, H-1'a), 4.40 (d, 1H, *J*<sub>gem</sub> = 11.8 Hz, H-1'b), 4.27 (dd, 1H, *J*<sub>2,1</sub> = 5.0 Hz, *J*<sub>2,3</sub> = 2.5 Hz, H-2), 4.24 (dd, 1H, *J*<sub>4,3</sub> = 8.0 Hz, *J*<sub>4,5</sub> = 2.0 Hz, H-4), 4.19–4.13 (m, 2H, H-3'),

H-4'), 4.07 (dd, 1H,  $J_{5'a,4} = 7.4$  Hz,  $J_{gem} = 8.4$  Hz, H-5'a), 3.88 (ddd, 1H,  $J_{5,4} = 2.0$  Hz,  $J_{5,6a} = 7.0$  Hz,  $J_{5,6b} = 6.2$  Hz, H-5), 3.77 (app t, 1H,  $J_{5b,4} = J_{gem} = 8.4$  Hz, H-5'b), 3.76 (dd, 1H,  $J_{6a,5} = 7.0$  Hz,  $J_{gem} = 9.7$  Hz, H-6a), 3.72 (dd, 1H,  $J_{6b,5} = 6.2$  Hz,  $J_{gem} = 9.7$  Hz, H-6b), 1.48 (s, 3H, (CH<sub>3</sub>)<sub>2</sub>C), 1.37 (s, 3H, (CH<sub>3</sub>)<sub>2</sub>C), 1.31 (s, 3H, (CH<sub>3</sub>)<sub>2</sub>C), 1.22 (s, 3H, (CH<sub>3</sub>)<sub>2</sub>C); <sup>13</sup>C NMR (CDCl<sub>3</sub>, 125 MHz) δ<sub>C</sub> 166.1 (C=O), 136.6 (Ar), 135.7 (Ar), 132.8 (Ar), 131.7 (Ar), 131.5 (Ar), 130.5 (Ar), 129.8 (2C, Ar), 129.7 (Ar), 129.6 (Ar), 128.3 (2C, Ar), 109.2 ((CH<sub>3</sub>)<sub>2</sub>C), 108.6 ((CH<sub>3</sub>)<sub>2</sub>C), 108.2 (C-2'), 96.4 (C-1), 87.6 (C-3'), 81.1 (C-4'), 70.9 (C-2), 70.7 (C-4), 70.6 (C-3), 69.7 (ArCH<sub>2</sub>), 68.9 (ArCH<sub>2</sub>), 68.4 (C-5'), 66.9 (C-5), 62.2 (C-1'), 60.6 (C-6), 26.1 ((CH<sub>3</sub>)<sub>2</sub>C), 26.0 ((CH<sub>3</sub>)<sub>2</sub>C), 25.0 ((CH<sub>3</sub>)<sub>2</sub>C), 24.4 ((CH<sub>3</sub>)<sub>2</sub>C); HRMS (ESI) calcd. for C<sub>32</sub>H<sub>38</sub>NaO<sub>11</sub> [M+Na]<sup>+</sup> 621.2306; found 621.2307. Data for **39β**: [α]<sup>25</sup><sub>D</sub> -22.4 (*c* 1.0, CHCl<sub>3</sub>); R<sub>f</sub> 0.27 (2:1, hexane–EtOAc); <sup>1</sup>H NMR (CDCl<sub>3</sub>, 500 MHz) δ<sub>H</sub> 7.92–7.88 (m, 2H, ArH), 7.57–7.52 (m, 1H, ArH), 7.43–7.28 (m, 6H, ArH), 5.50 (d, 1H,  $J_{1,2} = 5.0$  Hz, H-1), 5.00 (d, 1H,  $J_{gem} = 12.6$  Hz, ArCH<sub>2</sub>), 4.87 (d, 1H,  $J_{gem} = 12.6$  Hz, ArCH<sub>2</sub>), 4.80 (d, 1H,  $J_{gem} = 12.6$  Hz, ArCH<sub>2</sub>), 4.77 (d, 1H,  $J_{gem} = 12.6$  Hz, ArCH<sub>2</sub>), 4.60 (d, 1H,  $J_{gem} = 11.8$  Hz, H-1'a), 4.56 (dd, 1H,  $J_{3,2} = 2.1$  Hz,  $J_{3,4} = 8.0$  Hz, H-3), 4.40–4.35 (m, 2H, H-4', H-5'a), 4.33 (d, 1H,  $J_{gem} = 11.8$  Hz, H-1'b), 4.27 (dd, 1H,  $J_{2,1} = 5.0$  Hz,  $J_{2,3} = 2.1$  Hz, H-2), 4.24 (dd, 1H,  $J_{4,3} = 8.0$  Hz,  $J_{4,5} = 1.8$  Hz, H-4), 4.14 (d, 1H,  $J_{3'4'} = 4.4$  Hz, H-3'), 4.04 (ddd, 1H,  $J_{5,4} = 1.8$  Hz,  $J_{5,6a} = 7.8$  Hz,  $J_{5,6b} = 6.0$  Hz, H-5), 3.87 (dd, 1H,  $J_{6a,5} = 7.8$  Hz,  $J_{gem} = 9.6$  Hz, H-6a), 3.78–3.73 (m, 1H, H-5'b), 3.70 (dd, 1H,  $J_{6b,5} = 6.0$  Hz,  $J_{gem} = 9.6$  Hz, H-6b), 1.51 (s, 3H, (CH<sub>3</sub>)<sub>2</sub>C), 1.42 (s, 3H, (CH<sub>3</sub>)<sub>2</sub>C), 1.31 (s, 3H, (CH<sub>3</sub>)<sub>2</sub>C), 1.29 (s, 3H, (CH<sub>3</sub>)<sub>2</sub>C); <sup>13</sup>C NMR (CDCl<sub>3</sub>, 125 MHz) δ<sub>C</sub> 165.8 (C=O), 136.6 (Ar), 135.8 (Ar), 133.0 (Ar), 131.6 (Ar), 131.4 (Ar), 129.9 (Ar), 129.8 (2C, Ar), 129.5 (2C, Ar), 128.3 (2C, Ar), 109.0

((CH<sub>3</sub>)<sub>2</sub>C), 108.5 ((CH<sub>3</sub>)<sub>2</sub>C), 105.2 (C-2'), 96.2 (C-1), 83.7 (C-3'), 80.9 (C-4'), 71.0 (C-5'), 70.8 (C-2), 70.7 (C-4), 70.6 (C-3), 69.6 (ArCH<sub>2</sub>), 69.0 (ArCH<sub>2</sub>), 66.4 (C-5), 62.6 (C-1'), 60.3 (C-6), 26.12 ((CH<sub>3</sub>)<sub>2</sub>C), 26.06 ((CH<sub>3</sub>)<sub>2</sub>C), 24.9 ((CH<sub>3</sub>)<sub>2</sub>C), 24.5 ((CH<sub>3</sub>)<sub>2</sub>C); HRMS (ESI) calcd. for C<sub>32</sub>H<sub>38</sub>NaO<sub>11</sub> [M+Na]<sup>+</sup> 621.2306; found 621.2304.

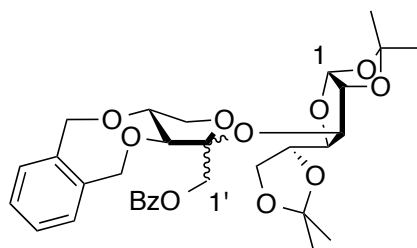

**1-*O*-benzoyl-3,4-*O*-xylylidene- $\alpha$ -D-*threo*-pent-2-ulofuranosyl-(2 $\rightarrow$ 3)-1,2,5,6-di-*O*-isopropylidene- $\alpha$ -D-glucopyranose (40 $\alpha$ )** and **1-*O*-benzoyl-3,4-*O*-xylylidene- $\beta$ -D-*threo*-pent-2-ulofuranosyl-(2 $\rightarrow$ 6)-1,2,3,4-di-*O*-isopropylidene- $\alpha$ -D-galactopyranose (40 $\beta$ )**. A mixture of the **8** (23.7 mg, 0.0512 mmol), **26** (16.0 mg, 0.0615 mmol), and 4Å molecular sieves in CH<sub>2</sub>Cl<sub>2</sub> (2.04 mL) was stirred under an Ar atmosphere at room temperature for 30 min. The mixture was then cooled to -78 °C and *N*-iodosuccinimide (13.8 mg, 0.0615 mmol) and silver triflate (1.3 mg, 5.12  $\mu$ mol) were added. After stirring for 1 h at -78 °C, triethylamine was added. The reaction was warmed to room temperature and then a small amount of water was added, followed by solid Na<sub>2</sub>S<sub>2</sub>O<sub>3</sub>·5H<sub>2</sub>O until the solution was colorless. The solution was then dried over MgSO<sub>4</sub>, filtered and the filtrate was concentrated under reduced pressure. The resulting residue was purified by column chromatography (4:1, hexane–EtOAc) to give an inseparable mixture of **40 $\alpha$**  and **40 $\beta$**  (23.0 mg, 75%,  $\alpha/\beta$  = 1:5.9) as a colorless oil. *R*<sub>f</sub> 0.30 (3:1, hexane–EtOAc). Data for major isomer, **40 $\beta$** : <sup>1</sup>H NMR (CDCl<sub>3</sub>, 500 MHz)  $\delta$ <sub>H</sub> 7.98–7.93 (m, 2H, ArH), 7.62–7.56 (m, 1H, ArH), 7.48–7.32 (m, 5H, ArH), 7.31–

7.28 (m, 1H, ArH), 5.90 (d, 1H,  $J_{1,2} = 3.8$  Hz, H-1), 4.98 (d, 1H,  $J_{\text{gem}} = 12.6$  Hz, ArCH<sub>2</sub>), 4.88 (d, 1H,  $J_{\text{gem}} = 12.5$  Hz, ArCH<sub>2</sub>), 4.78 (d, 1H,  $J_{\text{gem}} = 12.6$  Hz, ArCH<sub>2</sub>), 4.77 (d, 1H,  $J_{\text{gem}} = 12.6$  Hz, ArCH<sub>2</sub>), 4.58 (d, 1H,  $J_{2,1} = 3.8$  Hz, H-2), 4.55 (d, 1H,  $J_{\text{gem}} = 11.6$  Hz, H-1'a), 4.51 (dd, 1H,  $J_{6a,5} = 8.1$  Hz,  $J_{\text{gem}} = 9.5$  Hz, H-6a), 4.43 (d, 1H,  $J_{3,4} = 3.5$  Hz, H-3), 4.41 (m, 1H, H-4'), 4.35–4.30 (m, 1H, H-5), 4.29 (d, 1H,  $J_{\text{gem}} = 11.6$  Hz, H-1'b), 4.19 (dd, 1H,  $J_{4,3} = 3.5$  Hz,  $J_{4,5} = 7.0$  Hz, H-4), 4.17 (d, 1H,  $J_{3',4'} = 5.6$  Hz, H-3'), 4.08 (dd, 1H,  $J_{5',b,4'} = 8.4$  Hz,  $J_{\text{gem}} = 6.3$  Hz, H-5'a), 4.00 (dd, 1H,  $J_{5',b,4'} = 8.4$  Hz,  $J_{\text{gem}} = 6.3$  Hz, H-5'b), 3.74 (dd, 1H,  $J_{6b,5} = 4.9$  Hz,  $J_{\text{gem}} = 9.5$  Hz, H-6b), 1.48 (s, 3H, (CH<sub>3</sub>)<sub>2</sub>C), 1.42 (s, 3H, (CH<sub>3</sub>)<sub>2</sub>C), 1.28 (s, 3H, (CH<sub>3</sub>)<sub>2</sub>C), 1.27 (s, 3H, (CH<sub>3</sub>)<sub>2</sub>C); <sup>13</sup>C NMR (CDCl<sub>3</sub>, 125 MHz)  $\delta_{\text{C}}$  165.8 (C=O), 136.4 (Ar), 135.7 (Ar), 133.2 (Ar), 131.5 (Ar), 131.3 (Ar), 129.8 (2C, Ar), 129.59 (Ar), 129.58 (Ar), 128.4 (2C, Ar), 111.6 ((CH<sub>3</sub>)<sub>2</sub>C), 109.0 ((CH<sub>3</sub>)<sub>2</sub>C), 105.9 (C-2'), 105.0 (C-1), 84.8 (C-2), 83.9 (C-3'), 81.2 (C-4), 80.6 (C-4'), 74.8 (C-3), 72.3 (C-5), 70.9 (C-6), 69.3 (ArCH<sub>2</sub>), 69.1 (ArCH<sub>2</sub>), 67.3 (C-5'), 64.4 (C-1'), 26.8 ((CH<sub>3</sub>)<sub>2</sub>C), 26.7 ((CH<sub>3</sub>)<sub>2</sub>C), 26.3 ((CH<sub>3</sub>)<sub>2</sub>C), 25.5 ((CH<sub>3</sub>)<sub>2</sub>C); HRMS (ESI) calcd. for C<sub>32</sub>H<sub>38</sub>NaO<sub>11</sub> [M+Na]<sup>+</sup> 621.2306; found 621.2304.

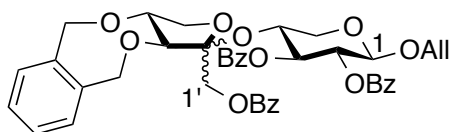

**Allyl 1-O-benzoyl-3,4-O-xylylidene- $\alpha$ -D-threo-pent-2-ulofuranosyl-(2→4)-2,3-di-O-benzoyl- $\beta$ -D-xylopyranoside (41 $\alpha$ ) and Allyl 1-O-benzoyl-3,4-O-xylylidene- $\beta$ -D-threo-pent-2-ulofuranosyl-(2→4)-2,3-di-O-benzoyl- $\beta$ -D-xylopyranoside (41 $\beta$ ).** A mixture of **8** (65.0 mg, 0.140 mmol), **27** (46.7 mg, 0.117 mmol), and 4Å molecular sieves in CH<sub>2</sub>Cl<sub>2</sub> (3.9 mL) was stirred under an Ar atmosphere at room temperature for

30 min. The mixture was then cooled to  $-78\text{ }^{\circ}\text{C}$  and *N*-iodosuccinimide (38.0 mg, 0.169 mmol) and silver triflate (3.6 mg, 14.0  $\mu\text{mol}$ ) were added. After stirring for 30 min at  $-78\text{ }^{\circ}\text{C}$ , triethylamine was added. The reaction was warmed to room temperature and then a small amount of water was added, followed by solid  $\text{Na}_2\text{S}_2\text{O}_3 \cdot 5\text{H}_2\text{O}$  until the solution was colorless. The solution was then dried over  $\text{MgSO}_4$ , filtered and the filtrate was concentrated under reduced pressure. The resulting residue was purified by column chromatography (4:1, hexane–EtOAc) to give an inseparable mixture of **41 $\alpha$**  and **41 $\beta$**  (76.0 mg, 88%,  $\alpha/\beta = 1:10.1$ ) as a colorless oil.  $R_f$  0.42 (2:1, hexane–EtOAc). Data for major isomer, **41 $\beta$** :  $^1\text{H}$  NMR ( $\text{CDCl}_3$ , 500 MHz)  $\delta_{\text{H}}$  7.98–7.87 (m, 6H, ArH), 7.58–7.45 (m, 3H, ArH), 7.44–7.27 (m, 8H, ArH), 7.25–7.21 (m, 1H, ArH), 7.14–7.10 (m, 1H, ArH), 5.89–5.76 (m, 1H,  $\text{OCH}_2\text{CH}=\text{CH}_2$ ), 5.67 (app t, 1H,  $J_{3,2} = J_{3,4} = 8.4$  Hz, H-3), 5.35 (dd, 1H,  $J_{2,1} = 7.0$  Hz,  $J_{2,3} = 8.4$  Hz, H-2), 5.24 (dq, 1H,  $J = 17.3, 1.6$  Hz,  $\text{OCH}_2\text{CH}=\text{CH}_2$ ), 5.13 (dq, 1H,  $J = 10.4, 1.6$  Hz,  $\text{OCH}_2\text{CH}=\text{CH}_2$ ), 4.83 (d, 1H,  $J_{\text{gem}} = 12.8$  Hz, Ar $\text{CH}_2$ ), 4.72 (d, 1H,  $J_{1,2} = 7.0$  Hz, H-1), 4.67 (d, 1H,  $J_{\text{gem}} = 12.8$  Hz, Ar $\text{CH}_2$ ), 4.62 (d, 1H,  $J_{\text{gem}} = 12.8$  Hz, Ar $\text{CH}_2$ ), 4.55 (d, 1H,  $J_{\text{gem}} = 12.8$  Hz, Ar $\text{CH}_2$ ), 4.45 (d, 1H,  $J_{\text{gem}} = 11.8$  Hz, H-1'a), 4.31 (ddt, 1H,  $J = 13.3, 5.0, 1.6$  Hz,  $\text{OCH}_2\text{CH}=\text{CH}_2$ ), 4.27–4.19 (m, 3H, H-4, H-5a, H-1'b), 4.15–4.01 (m, 4H, H-5'a, H-3', H-4',  $\text{OCH}_2\text{CH}=\text{CH}_2$ ), 3.63 (dd, 1H,  $J_{5b,4} = 8.5$  Hz,  $J_{\text{gem}} = 11.5$  Hz, H-5b), 3.51 (dd, 1H,  $J_{5'b,4'} = 4.9$  Hz,  $J_{\text{gem}} = 9.5$  Hz, H-5'b);  $^{13}\text{C}$  NMR ( $\text{CDCl}_3$ , 125 MHz)  $\delta_{\text{C}}$  165.7 (C=O), 165.4 (C=O), 165.3 (C=O), 136.5 (Ar), 135.5 (Ar), 133.6 ( $\text{OCH}_2\text{CH}=\text{CH}_2$ ), 133.20 (Ar), 133.18 (Ar), 131.4 (Ar), 131.3 (Ar), 129.83 (2C, Ar), 129.76 (2C, Ar), 129.70 (2C, Ar), 129.62, (Ar), 129.58 (Ar), 129.5 (Ar), 129.44 (Ar), 129.40 (Ar), 128.45 (2C, Ar), 128.43 (2C, Ar), 128.3 (2C, Ar), 117.5 ( $\text{OCH}_2\text{CH}=\text{CH}_2$ ), 105.6 (C-2'), 99.8 (C-1), 83.3 (C-3'), 80.4 (C-4'),

72.8 (C-3), 71.6 (C-2), 70.5 (C-5'), 69.7 (OCH<sub>2</sub>CH=CH<sub>2</sub>), 69.18 (ArCH<sub>2</sub>), 69.14 (ArCH<sub>2</sub>), 68.1 (C-4), 64.9 (C-5), 64.0 (C-1'); HRMS (ESI) calcd. for C<sub>42</sub>H<sub>40</sub>NaO<sub>12</sub> [M+Na]<sup>+</sup> 759.2412; found 759.2403.

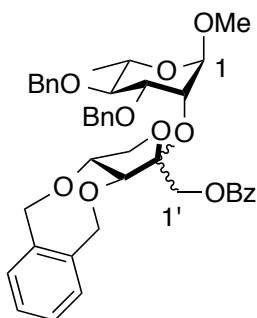

**Methyl 1-*O*-benzoyl-3,4-*O*-xylylidene- $\alpha$ -D-*threo*-pent-2-ulofuranosyl-(2 $\rightarrow$ 2)-3,4-di-*O*-benzyl- $\alpha$ -L-rhamnopyranoside (42 $\alpha$ ) and Methyl 1-*O*-benzoyl-3,4-*O*-xylylidene- $\beta$ -D-*threo*-pent-2-ulofuranosyl-(2 $\rightarrow$ 2)-3,4-di-*O*-benzyl- $\alpha$ -L-rhamnopyranoside (42 $\beta$ ).** A mixture of **8** (24.0 mg, 0.0519 mmol), **28**<sup>3</sup> (15.5 mg, 0.0432 mmol), and 4Å molecular sieves in CH<sub>2</sub>Cl<sub>2</sub> (1.50 mL) was stirred under an Ar atmosphere at room temperature for 30 min. The mixture was then cooled to -78 °C and *N*-iodosuccinimide (14.0 mg, 0.0623 mmol) and silver triflate (1.3 mg, 5.19  $\mu$ mol) were added. After stirring for 2 h at -78 °C, triethylamine was added. The reaction was warmed to room temperature and then a small amount of water was added, followed by solid Na<sub>2</sub>S<sub>2</sub>O<sub>3</sub>·5H<sub>2</sub>O until the solution was colorless. The solution was then dried over MgSO<sub>4</sub>, filtered and the filtrate was concentrated under reduced pressure. The resulting residue was purified by column chromatography (4:1, hexane–EtOAc) to give **42 $\alpha$**  (9.0 mg, 30%) as a colorless oil and **42 $\beta$**  (15.8 mg, 52%) as a colorless oil. Data for **42 $\alpha$** : [ $\alpha$ ]<sub>D</sub><sup>25</sup> +28.8 (*c* 0.2, CHCl<sub>3</sub>); R<sub>f</sub> 0.58 (2:1, hexane–EtOAc); <sup>1</sup>H NMR (CDCl<sub>3</sub>, 500 MHz)  $\delta$ <sub>H</sub> 7.95–7.91 (m, 2H, ArH), 7.57–7.52 (m, 1H, ArH), 7.41–7.21 (m, 16H, ArH), 4.97

(d, 1H,  $J_{\text{gem}} = 11.2$  Hz, ArCH<sub>2</sub>), 4.90 (d, 1H,  $J_{\text{gem}} = 12.5$  Hz, ArCH<sub>2</sub>), 4.74 (d, 1H,  $J_{\text{gem}} = 12.5$  Hz, ArCH<sub>2</sub>), 4.72 (d, 1H,  $J_{\text{gem}} = 11.9$  Hz, ArCH<sub>2</sub>), 4.70 (d, 1H,  $J_{\text{gem}} = 12.5$  Hz, ArCH<sub>2</sub>), 4.66 (d, 1H,  $J_{\text{gem}} = 11.2$  Hz, ArCH<sub>2</sub>), 4.65 (d, 1H,  $J_{1,2} = 1.8$  Hz, H-1), 4.61 (d, 1H,  $J_{\text{gem}} = 12.5$  Hz, ArCH<sub>2</sub>), 4.59 (d, 1H,  $J_{\text{gem}} = 11.9$  Hz, ArCH<sub>2</sub>), 4.56 (d, 1H,  $J_{\text{gem}} = 11.7$  Hz, H-1'a), 4.32 (dd, 1H,  $J_{2,1} = 1.8$  Hz,  $J_{2,3} = 3.2$  Hz, H-2), 4.35 (d, 1H,  $J_{\text{gem}} = 11.7$  Hz, H-1'b), 4.30 (d, 1H,  $J_{3,4'} = 5.6$  Hz, H-3'), 4.10–4.04 (m, 1H, H-4'), 4.00 (app t, 1H,  $J_{5'a,4'} = J_{\text{gem}} = 8.8$  Hz, H-5'a), 3.90 (app t, 1H,  $J_{5'b,4} = J_{\text{gem}} = 8.8$  Hz, H-5'b), 3.82 (dd, 1H,  $J_{3,2} = 3.2$  Hz,  $J_{3,4} = 9.5$  Hz, H-3), 3.66 (dq, 1H,  $J_{5,4} = 9.5$  Hz,  $J_{5,6} = 6.3$  Hz, H-5), 3.53 (app t, 1H,  $J_{4,3} = J_{4,5} = 9.5$  Hz, H-4), 3.23 (s, 3H, OCH<sub>3</sub>), 1.32 (d, 3H,  $J_{6,5} = 6.3$  Hz, H-6); <sup>13</sup>C NMR (CDCl<sub>3</sub>, 125 MHz)  $\delta_{\text{C}}$  166.0 (C=O), 138.71 (Ar), 138.68 (Ar), 137.1 (Ar), 135.4 (Ar), 132.9 (Ar), 131.6 (Ar), 131.4 (Ar), 130.2 (Ar), 129.7 (2C, Ar), 129.6 (Ar), 129.4 (Ar), 128.4 (3C, Ar), 128.3 (2C, Ar), 128.1 (2C, Ar), 127.7 (2C, Ar), 127.6 (Ar), 127.4 (Ar), 108.8 (C-2'), 100.9 (C-1,  $J_{\text{C1,H1}} = 171.6$  Hz), 88.5 (C-3'), 79.9 (C-4'), 79.7 (C-4), 78.9 (C-3), 75.1 (ArCH<sub>2</sub>), 72.1 (ArCH<sub>2</sub>), 69.7 (C-2), 69.3 (ArCH<sub>2</sub>), 69.04 (ArCH<sub>2</sub>), 69.03 (C-5'), 68.0 (C-5), 64.5 (C-1'), 54.6 (OCH<sub>3</sub>), 18.0 (C-6); HRMS (ESI) calcd. for C<sub>41</sub>H<sub>44</sub>NaO<sub>10</sub> [M+Na]<sup>+</sup> 719.2827; found 719.2830. Data for **42β**: [ $\alpha$ ]<sub>D</sub><sup>25</sup> –2.9 (*c* 0.2, CHCl<sub>3</sub>); R<sub>f</sub> 0.40 (2:1, hexane–EtOAc); <sup>1</sup>H NMR (CDCl<sub>3</sub>, 500 MHz)  $\delta_{\text{H}}$  7.91–7.85 (m, 2H, ArH), 7.55–7.50 (m, 1H, ArH), 7.41–7.22 (m, 16H, ArH), 5.08 (d, 1H,  $J_{\text{gem}} = 12.8$  Hz, ArCH<sub>2</sub>), 4.89–4.80 (m, 4H, ArCH<sub>2</sub>), 4.76 (d, 1H,  $J_{\text{gem}} = 11.4$  Hz, ArCH<sub>2</sub>), 4.69–4.64 (m, 2H, H-1, H-1'a), 4.60 (d, 1H,  $J_{\text{gem}} = 11.4$  Hz, ArCH<sub>2</sub>), 4.59 (d, 1H,  $J_{\text{gem}} = 11.4$  Hz, ArCH<sub>2</sub>), 4.51 (ddd, 1H,  $J_{4',3'} = 6.4$  Hz,  $J_{4',5'a} = 7.9$  Hz,  $J_{4',5'b} = 5.5$  Hz, H-4'), 4.28 (d, 1H,  $J_{\text{gem}} = 11.9$  Hz, H-1'b), 4.24 (d, 1H,  $J_{5'a,4'} = 7.9$  Hz,  $J_{\text{gem}} = 9.6$  Hz, H-5'a), 4.18–4.14 (m, 2H, H-2, H-3'), 3.84 (dd, 1H,  $J_{3,2} = 2.9$  Hz,  $J_{3,4} = 9.4$  Hz, H-



3), 3.74 (dd, 1H,  $J_{5'b,4'} = 5.5$  Hz,  $J_{gem} = 9.6$  Hz, H-5'b), 3.65 (app dq, 1H,  $J_{5,4} = 9.4$  Hz,  $J_{5,6} = 6.2$  Hz, H-5), 3.53 (app t, 1H,  $J_{4,3} = J_{4,5} = 9.4$  Hz, H-4), 3.29 (s, 3H, OCH<sub>3</sub>), 1.27 (d, 3H,  $J_{6,5} = 6.2$  Hz, H-6); <sup>13</sup>C NMR (CDCl<sub>3</sub>, 125 MHz)  $\delta_C$  165.8 (C=O), 138.7 (Ar), 138.4 (Ar), 136.7 (Ar), 136.2 (Ar), 132.9 (Ar), 131.4 (Ar), 131.2 (Ar), 129.9 (Ar), 129.7 (2C, Ar), 129.4 (Ar), 129.2 (Ar), 129.0 (2C, Ar), 128.29 (2C, Ar), 128.28 (2C, Ar), 128.1 (2C, Ar), 128.0 (2C, Ar), 127.54 (Ar), 127.47 (Ar), 105.9 (C-2'), 100.2 (C-1,  $J_{C1,H1} = 172.1$  Hz), 82.9 (C-3'), 80.2 (C-4), 80.0 (C-4'), 78.6 (C-3), 74.9 (ArCH<sub>2</sub>), 72.6 (ArCH<sub>2</sub>), 70.5 (C-5'), 70.0 (C-2), 69.5 (ArCH<sub>2</sub>), 69.2 (ArCH<sub>2</sub>), 68.0 (C-5), 62.8 (C-1'), 54.7 (OCH<sub>3</sub>), 18.1 (C-6); HRMS (ESI) calcd. for C<sub>41</sub>H<sub>44</sub>NaO<sub>10</sub> [M+Na]<sup>+</sup> 719.2827; found 719.2831.

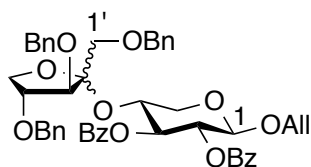

**Allyl 1,3,4-tri-*O*-benzyl- $\alpha$ -D-*threo*-pent-2-ulo-furanosyl-(2→4)-2,3-di-*O*-benzoyl- $\beta$ -D-xylopyranoside (45 $\alpha$ ) and Allyl 1,3,4-tri-*O*-benzyl- $\alpha$ -D-*threo*-pent-2-ulo-furanosyl-(2→4)-2,3-di-*O*-benzoyl- $\beta$ -D-xylopyranoside (45 $\beta$ ).** A mixture of the **9** (28.0 mg, 0.0530 mmol), **27** (17.7 mg, 0.0440 mmol), and 4Å molecular sieves in CH<sub>2</sub>Cl<sub>2</sub> (1.50 mL) was stirred under an Ar atmosphere at room temperature for 30 min. The mixture was then cooled to -78 °C and *N*-iodosuccinimide (14.3 mg, 0.0636 mmol) and silver triflate (1.4 mg, 5.3  $\mu$ mol) were added. After stirring for 1 h at -78 °C, triethylamine was added. The reaction was warmed to room temperature and then a small amount of water was added, followed by solid Na<sub>2</sub>S<sub>2</sub>O<sub>3</sub>·5H<sub>2</sub>O until the solution was colorless. The solution was then dried over MgSO<sub>4</sub>, filtered and the filtrate was

concentrated under reduced pressure. The resulting residue was purified by column chromatography (4:1, hexane–EtOAc) to give **45a** (18.9 mg, 53%) as a colorless oil and **45b** (11.8 mg, 33%) as a colorless oil. Data for **45a**:  $[\alpha]_D^{25} +6.6$  (*c* 1.0, CHCl<sub>3</sub>); *R<sub>f</sub>* 0.32 (4:1, hexane–EtOAc); <sup>1</sup>H NMR (CDCl<sub>3</sub>, 500 MHz)  $\delta_H$  7.99–7.96 (m, 2H, ArH), 7.94–7.91 (m, 2H, ArH), 7.51–7.43 (m, 2H, ArH), 7.37–7.31 (m, 4H, ArH), 7.30–7.26 (m, 5H, ArH), 7.25–7.23 (m, 3H, ArH), 7.22–7.19 (m, 3H, ArH), 7.13–7.08 (m, 4H, ArH), 5.82 (m, 1H, OCH<sub>2</sub>CH=CH<sub>2</sub>), 5.59 (dd, 1H, *J*<sub>3,2</sub> = 8.7 Hz, *J*<sub>3,4</sub> = 7.9 Hz, H-3), 5.33 (dd, 1H, *J*<sub>2,1</sub> = 6.7 Hz, *J*<sub>2,3</sub> = 8.7 Hz, H-2), 5.25 (dq, 1H, *J* = 17.2, 1.6 Hz, OCH<sub>2</sub>CH=CH<sub>2</sub>), 5.14 (dq, 1H, *J* = 10.4, 1.6 Hz, OCH<sub>2</sub>CH=CH<sub>2</sub>), 4.70 (d, 1H, *J*<sub>1,2</sub> = 6.7 Hz, H-1), 4.54 (d, 1H, *J*<sub>gem</sub> = 12.1 Hz, ArCH<sub>2</sub>), 4.43 (d, 1H, *J*<sub>gem</sub> = 12.1 Hz, ArCH<sub>2</sub>), 4.39 (d, 1H, *J*<sub>gem</sub> = 12.1 Hz, ArCH<sub>2</sub>), 4.36 (d, 1H, *J*<sub>gem</sub> = 12.1 Hz, ArCH<sub>2</sub>), 4.31 (ddt, 1H, *J* = 13.2, 4.9, 1.6 Hz, OCH<sub>2</sub>CH=CH<sub>2</sub>), 4.27–4.21 (m, 2H, H-4, H-5a), 4.20 (s, 2H, ArCH<sub>2</sub>), 4.13–4.03 (m, 4H, H-3', H-4', H-5'a, OCH<sub>2</sub>CH=CH<sub>2</sub>), 3.78 (dd, 1H, *J*<sub>5'b,4'</sub> = 9.0 Hz, *J*<sub>gem</sub> = 11.7 Hz, H-5'b), 3.51 (s, 2H, H-1'), 3.43 (dd, 1H, *J*<sub>5b,4</sub> = 9.9 Hz, *J*<sub>gem</sub> = 13.3 Hz, H-5b); <sup>13</sup>C NMR (CDCl<sub>3</sub>, 125 MHz)  $\delta_C$  165.6 (C=O), 165.3 (C=O), 138.8 (Ar), 137.9 (Ar), 137.8 (Ar), 133.7 (OCH<sub>2</sub>CH=CH<sub>2</sub>), 133.01 (Ar), 132.98 (Ar), 129.9 (2C, Ar), 129.83 (2C, Ar), 129.77 (Ar), 129.7 (Ar), 128.4 (Ar), 128.30 (Ar), 128.29 (Ar), 128.2 (Ar), 127.80 (Ar), 127.77 (Ar), 127.75 (Ar), 127.65 (Ar), 127.5 (Ar), 117.47 (OCH<sub>2</sub>CH=CH<sub>2</sub>), 108.8 (C-2'), 99.7 (C-1), 88.4 (C-3'), 81.9 (C-4'), 73.4 (ArCH<sub>2</sub>), 72.8 (C-3), 72.6 (ArCH<sub>2</sub>), 72.0 (C-2), 71.4 (ArCH<sub>2</sub>), 70.2 (C-1'), 69.6 (C-5'), 68.9 (OCH<sub>2</sub>CH=CH<sub>2</sub>), 68.3 (C-4), 64.9 (C-5); HRMS (ESI) calcd. for C<sub>48</sub>H<sub>48</sub>NaO<sub>11</sub> [M+Na]<sup>+</sup> 823.3089; found 823.3103. Data for **45b**:  $[\alpha]_D^{25} -18.1$  (*c* 1.0, CHCl<sub>3</sub>); *R<sub>f</sub>* 0.27 (4:1, hexane–EtOAc); <sup>1</sup>H NMR (CDCl<sub>3</sub>, 500 MHz)  $\delta_H$  8.01–7.93 (m, 4H, ArH), 7.51–

7.44 (m, 2H, ArH), 7.38–7.22 (m, 17H, ArH), 7.11–7.06 (m, 2H, ArH), 5.80 (m, 1H, OCH<sub>2</sub>CH=CH<sub>2</sub>), 5.62 (app t, 1H,  $J_{3,2} = J_{3,4} = 8.7$  Hz, H-3), 5.34 (dd, 1H,  $J_{2,1} = 7.0$  Hz,  $J_{2,3} = 8.7$  Hz, H-2), 5.24 (dq, 1H,  $J = 17.3, 1.7$  Hz, OCH<sub>2</sub>CH=CH<sub>2</sub>), 5.13 (dq, 1H,  $J = 10.4, 1.7$  Hz, OCH<sub>2</sub>CH=CH<sub>2</sub>), 4.70 (d, 1H,  $J_{1,2} = 7.0$  Hz, H-1), 4.69 (d, 1H,  $J_{\text{gem}} = 12.4$  Hz, ArCH<sub>2</sub>), 4.54 (d, 1H,  $J_{\text{gem}} = 12.4$  Hz, ArCH<sub>2</sub>), 4.48 (d, 1H,  $J_{\text{gem}} = 12.4$  Hz, ArCH<sub>2</sub>), 4.47 (d, 1H,  $J_{\text{gem}} = 12.4$  Hz, ArCH<sub>2</sub>), 4.31 (ddt, 1H,  $J = 13.3, 5.0, 1.7$  Hz, OCH<sub>2</sub>CH=CH<sub>2</sub>), 4.29–4.24 (m, 1H, H-4), 4.15–4.08 (m, 3H, H-5a, OCH<sub>2</sub>CH=CH<sub>2</sub>, ArCH<sub>2</sub>), 4.07 (d, 1H,  $J_{3',4'} = 5.7$  Hz, H-3'), 4.05–3.98 (m, 2H, H-4', ArCH<sub>2</sub>), 3.78 (dd, 1H,  $J_{5'a,4'} = 6.5$  Hz,  $J_{\text{gem}} = 9.2$  Hz, H-5'a), 3.53 (d, 1H,  $J_{\text{gem}} = 10.7$  Hz, H-1'a), 3.51 (dd, 1H,  $J_{5b,4} = 12.2$  Hz,  $J_{\text{gem}} = 13.7$  Hz, H-5b), 3.44 (dd, 1H,  $J_{5'b,4'} = 5.4$  Hz,  $J_{\text{gem}} = 9.2$  Hz, H-5'b), 3.40 (d, 1H,  $J_{\text{gem}} = 10.7$  Hz, H-1'b); <sup>13</sup>C NMR (CDCl<sub>3</sub>, 125 MHz)  $\delta_{\text{C}}$  165.5 (C=O), 165.4 (C=O), 138.5 (Ar), 137.9 (Ar), 137.5 (Ar), 133.6 (OCH<sub>2</sub>CH=CH<sub>2</sub>), 133.11 (Ar), 133.06 (Ar), 129.9 (Ar), 129.8 (Ar), 129.6 (Ar), 128.5 (Ar), 128.43 (Ar), 128.39 (Ar), 128.34 (Ar), 128.31 (Ar), 128.2 (Ar), 127.9 (Ar), 127.84 (Ar), 127.82 (Ar), 127.8 (Ar), 127.75 (Ar), 127.7 (Ar), 127.65 (Ar), 127.5 (Ar), 127.5 (Ar), 117.5 (OCH<sub>2</sub>CH=CH<sub>2</sub>), 105.2 (C-2'), 99.96 (C-1), 83.8 (C-3'), 82.4 (C-4'), 73.6 (ArCH<sub>2</sub>), 73.2 (C-3), 72.4 (ArCH<sub>2</sub>), 72.0 (ArCH<sub>2</sub>), 71.8 (C-2), 70.5 (C-1'), 69.8 (C-5'), 69.4 (OCH<sub>2</sub>CH=CH<sub>2</sub>), 68.0 (C-4), 65.2 (C-5); HRMS (ESI) calcd. for C<sub>48</sub>H<sub>48</sub>NaO<sub>11</sub> [M+Na]<sup>+</sup> 823.3089; found 823.3100.

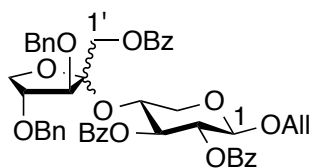

Allyl 1-*O*-benzoyl-3,4-di-*O*-benzyl- $\alpha$ -D-*threo*-pent-2-ulofuranosyl-(2 $\rightarrow$ 4)-2,3-di-*O*-benzoyl- $\beta$ -D-xylopyranoside (**46 $\alpha$** ) and Allyl 1-*O*-benzoyl-3,4-di-*O*-benzyl- $\beta$ -D-*threo*-pent-2-ulofuranosyl-(2 $\rightarrow$ 4)-2,3-di-*O*-benzoyl- $\beta$ -D-xylopyranoside (**46 $\beta$** ). A mixture of **10** (45.1 mg, 0.0830 mmol), **27** (27.7 mg, 0.070 mmol), and 4Å molecular sieves in CH<sub>2</sub>Cl<sub>2</sub> (2.3 mL) was stirred under an Ar atmosphere at room temperature for 30 min. The mixture was then cooled to -78 °C and *N*-iodosuccinimide (22.8 mg, 0.0996 mmol) and silver triflate (4.3 mg, 16.6  $\mu$ mol) were added. After stirring for 1.5 h at -78 °C, triethylamine was added. The reaction was warmed to room temperature and then a small amount of water was added, followed by solid Na<sub>2</sub>S<sub>2</sub>O<sub>3</sub>·5H<sub>2</sub>O until the solution was colorless. The solution was then dried over MgSO<sub>4</sub>, filtered and the filtrate was concentrated under reduced pressure. The resulting residue was purified by column chromatography (4:1, hexane–EtOAc) to give an inseparable mixture of **46 $\alpha$**  and **46 $\beta$**  (50.2 mg, 88%,  $\alpha/\beta = 1:1.4$ ) as a colorless oil. *R<sub>f</sub>* 0.31 (4:1, hexane–EtOAc). <sup>1</sup>H NMR (CDCl<sub>3</sub>, 700 MHz)  $\delta$ <sub>H</sub> 8.02–7.99 (m, 2H, ArH), 7.99–7.96 (m, 2H, ArH), 7.93–7.87 (m, 4H, ArH), 7.72–7.69 (m, 2H, ArH), 7.66–7.63 (m, 2H, ArH), 7.57–7.54 (m, 1H, ArH), 7.52–7.43 (m, 4H, ArH), 7.41–7.23 (m, 21H, ArH), 7.22–7.19 (m, 2H, ArH), 7.18–7.09 (m, 6H, ArH), 7.09–7.05 (m, 2H, ArH), 7.03–7.00 (m, 2H, ArH), 5.84–5.75 (m, 2H, OCH<sub>2</sub>CH=CH<sub>2</sub>( $\alpha$ ), OCH<sub>2</sub>CH=CH<sub>2</sub>( $\beta$ )), 5.67 (app t, 1H, *J*<sub>3,2</sub> = 8.5 Hz, *J*<sub>3,4</sub> = 8.5 Hz, H-3( $\beta$ )), 5.63 (app t, 1H, *J*<sub>3,2</sub> = *J*<sub>3,4</sub> = 9.1 Hz, H-3( $\alpha$ )), 5.37 (dd, 1H, *J*<sub>2,1</sub> = 6.8 Hz, *J*<sub>2,3</sub> = 8.5 Hz, H-2( $\beta$ )), 5.31 (dd, 1H, *J*<sub>2,1</sub> = 7.3 Hz, *J*<sub>2,3</sub> = 9.1 Hz, H-2( $\alpha$ )),

5.27–5.20 (m, 2H, OCH<sub>2</sub>CH=CH<sub>2</sub>(α), OCH<sub>2</sub>CH=CH<sub>2</sub>(β)), 5.15–5.10 (m, 2H, OCH<sub>2</sub>CH=CH<sub>2</sub>(α), OCH<sub>2</sub>C=CH<sub>2</sub>(β)), 4.74 (d, 1H, *J*<sub>1,2</sub> = 6.8 Hz, H-1(β)), 4.69 (d, 1H, *J*<sub>gem</sub> = 12.1 Hz, ArCH<sub>2</sub>(β)), 4.64 (d, 1H, *J*<sub>1,2</sub> = 7.3 Hz, H-1(α)), 4.61 (d, 1H, *J*<sub>gem</sub> = 12.1 Hz, ArCH<sub>2</sub>(β)), 4.55 (d, 1H, *J*<sub>gem</sub> = 12.1 Hz, ArCH<sub>2</sub>(α)), 4.52 (d, 1H, *J*<sub>gem</sub> = 12.1 Hz, H-1'a(α)), 4.43–4.39 (m, 2H, ArCH<sub>2</sub>(α), H-1(β)), 4.37–4.27 (m, 6H, OCH<sub>2</sub>CH=CH<sub>2</sub>(α), OCH<sub>2</sub>CH=CH<sub>2</sub>(β), H-4(α), H-4(β), ArCH<sub>2</sub>(α), ArCH<sub>2</sub>(β)), 4.24–4.17 (m, 5H, H-1'b(α), H-1'b(β), H-5a(α), H-5b(β), H-5'a(β)), 4.15–4.07 (m, 6H, H-3'(α), H-3'(β), H-4'(α), OCH<sub>2</sub>CH=CH<sub>2</sub>(α), OCH<sub>2</sub>CH=CH<sub>2</sub>(β), ArCH<sub>2</sub>(β)), 4.06–4.03 (m, 1H, H-4'(β)), 4.01–3.98 (m, 2H, H-5'b(α), ArCH<sub>2</sub>(α)), 3.90 (dd, 1H, *J*<sub>5'a,4'</sub> = 6.3 Hz, *J*<sub>gem</sub> = 8.0 Hz, H-5'a(β)), 3.61 (dd, 1H, *J*<sub>5b,4</sub> = 8.8 Hz, *J*<sub>gem</sub> = 11.9 Hz, H-5b(β)), 3.51 (dd, 1H, *J* = 5.3, 8.8 Hz, H-5'b(β)), 3.41 (dd, 1H, *J*<sub>5b,4</sub> = 9.0 Hz, *J*<sub>gem</sub> = 11.8 Hz, H-5b(α)); <sup>13</sup>C NMR (CDCl<sub>3</sub>, 175 MHz) δ<sub>C</sub> 165.7 (C=O), 165.5 (C=O), 165.4 (C=O), 165.3 (C=O), 165.28 (C=O), 165.2 (C=O), 137.9 (Ar), 137.69 (Ar), 137.67 (Ar), 136.9 (Ar), 133.66 (OCH<sub>2</sub>CH=CH<sub>2</sub>), 133.65 (OCH<sub>2</sub>CH=CH<sub>2</sub>), 133.25 (Ar), 133.22 (Ar), 133.1 (Ar), 133.0 (Ar), 132.9 (Ar), 132.7 (Ar), 129.89 (Ar), 129.86 (Ar), 129.8 (Ar), 129.7 (Ar), 129.6 (Ar), 129.57 (Ar), 129.5 (Ar), 129.45 (Ar), 128.8 (Ar), 128.5 (Ar), 128.44 (Ar), 128.4 (Ar), 128.31 (Ar), 128.28 (Ar), 128.24 (Ar), 128.0 (Ar), 127.97 (Ar), 127.89 (Ar), 127.85 (Ar), 127.8 (Ar), 127.79 (Ar), 127.7 (Ar), 127.5 (Ar), 117.51 (OCH<sub>2</sub>CH=CH<sub>2</sub>), 118.43 (OCH<sub>2</sub>CH=CH<sub>2</sub>), 108.9 (C-2'(α)), 104.2 (C-2'(β)), 100.1 (C-1(α)), 99.8 (C-1(β)), 86.5 (C-3'(α)), 83.0 (C-4'(α)), 82.1 (C-3'(β)), 81.3 (C-4'(β)), 73.0 (ArCH<sub>2</sub>), 72.9 (H-3(α)), 72.87 (H-3(β)), 72.79 (ArCH<sub>2</sub>), 72.5 (ArCH<sub>2</sub>), 72.3 (H-5'(α)), 72.1 (H-2(α)), 71.7 (ArCH<sub>2</sub>), 71.6 (H-2(β)), 69.7 (H-5'(β)), 69.68 (OCH<sub>2</sub>CH=CH<sub>2</sub>), 69.66 (OCH<sub>2</sub>CH=CH<sub>2</sub>), 68.7 (H-4(α)), 67.9 (H-4(β)), 65.5 (H-5(α)), 64.9 (H-5(β)), 63.8 (H-

1'( $\beta$ )), 62.3 (H-1'( $\alpha$ )); HRMS (ESI) calcd. for  $C_{29}H_{36}NaO_5Si$   $[M+H]^+$  837.2887; found 837.2884.

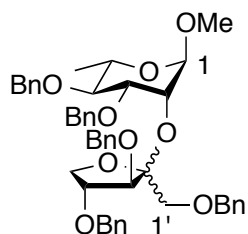

**Methyl 1,3,4-tri-*O*-benzyl- $\alpha$ -D-*threo*-pent-2-ulo-furanosyl-(2 $\rightarrow$ 2)-3,4-di-*O*-benzyl- $\alpha$ -L-rhamnopyranoside (47a)** and **Methyl 1,3,4-tri-*O*-benzyl- $\beta$ -D-*threo*-pent-2-ulo-furanosyl-(2 $\rightarrow$ 2)-3,4-di-*O*-benzyl- $\alpha$ -L-rhamnopyranoside (47 $\beta$ )**. A mixture of **9** (30.9 mg, 0.0586 mmol), **28**<sup>3</sup> (17.5 mg, 0.0488 mmol), and 4Å molecular sieves in  $CH_2Cl_2$  (1.63 mL) was stirred under an Ar atmosphere at room temperature for 30 min. The mixture was then cooled to  $-78$  °C and *N*-iodosuccinimide (15.8 mg, 0.0703 mmol) and silver triflate (1.5 mg, 5.86  $\mu$ mol) were added. After stirring for 1 h at  $-78$  °C, triethylamine was added. The reaction was warmed to room temperature and then a small amount of water was added, followed by solid  $Na_2S_2O_3 \cdot 5H_2O$  until the solution was colorless. The solution was then dried over  $MgSO_4$ , filtered and the filtrate was concentrated under reduced pressure. The resulting residue was purified by column chromatography (10:1, hexane–EtOAc) to give **47a** (18.2 mg, 49%) as a colorless oil and **47 $\beta$**  (9.5 mg, 26%) as a colorless oil. Data for **47a**:  $[\alpha]_D^{25} +21.9$  ( $c$  0.2,  $CHCl_3$ );  $R_f$  0.26 (4:1, hexane–EtOAc);  $^1H$  NMR ( $CDCl_3$ , 500 MHz)  $\delta_H$  7.40–7.24 (m, 25H, ArH), 4.87 (d, 1H,  $J_{gem} = 11.6$  Hz, Ar $CH_2$ ), 4.81 (d, 1H,  $J_{1,2} = 1.7$  Hz, H-1), 4.78 (d, 1H,  $J_{gem} = 11.6$  Hz, Ar $CH_2$ ), 4.69 (d, 1H,  $J_{gem} = 12.0$  Hz, Ar $CH_2$ ), 4.65–4.56 (m, 3H, Ar $CH_2$ ), 4.55 (d, 1H,  $J_{gem} = 12.0$  Hz, Ar $CH_2$ ), 4.53 (d, 1H,  $J_{gem} = 12.0$  Hz, Ar $CH_2$ ), 4.46 (d, 1H,

$J_{\text{gem}} = 11.6$  Hz, ArCH<sub>2</sub>), 4.42 (d, 1H,  $J_{\text{gem}} = 12.0$  Hz, ArCH<sub>2</sub>), 4.35 (dd, 1H,  $J_{2,1} = 1.7$  Hz,  $J_{2,3} = 3.1$  Hz, H-2), 4.25 (d, 1H,  $J_{3,4'} = 3.7$  Hz, H-3'), 4.16–4.09 (m, 2H, H-4', H-5'a), 4.02–3.95 (m, 1H, H-5'b), 3.83 (dd, 1H,  $J_{3,2} = 3.1$  Hz,  $J_{3,4} = 9.4$  Hz, H-3), 3.74 (d, 1H,  $J_{\text{gem}} = 10.8$  Hz, H-1'a), 3.68 (d, 1H,  $J_{\text{gem}} = 10.8$  Hz, H-1'b), 3.67–3.63 (m, 1H, H-5), 3.55 (app t, 1H,  $J_{4,3} = J_{4,5} = 9.4$  Hz, H-4), 3.28 (s, 3H, OCH<sub>3</sub>), 1.32 (d, 3H,  $J_{6,5} = 6.3$  Hz, H-6); <sup>13</sup>C NMR (CDCl<sub>3</sub>, 125 MHz)  $\delta_{\text{C}}$  138.9 (Ar), 138.8 (Ar), 138.4 (Ar), 138.2 (Ar), 138.0 (Ar), 128.4 (3C, Ar), 128.34 (2C, Ar), 128.29 (2C, Ar), 128.2 (2C, Ar), 127.96 (2C, Ar), 127.93 (2C, Ar), 127.92 (2C, Ar), 127.70 (2C, Ar), 127.69 (2C, Ar), 127.67 (Ar), 127.6 (Ar), 127.5 (Ar), 127.3 (Ar), 108.5 (C-2'), 100.9 (C-1,  $J_{\text{C1,H1}} = 172.8$  Hz), 88.2 (C-3'), 82.5 (C-4'), 80.1 (C-4), 79.5 (C-3), 75.2 (ArCH<sub>2</sub>), 73.9 (ArCH<sub>2</sub>), 72.6 (ArCH<sub>2</sub>), 72.0 (ArCH<sub>2</sub>), 71.9 (ArCH<sub>2</sub>), 70.0 (C-5'), 69.3 (C-1'), 68.9 (C-2), 68.1 (C-5), 54.5 (OCH<sub>3</sub>), 18.1 (C-6); HRMS (ESI) calcd. for C<sub>47</sub>H<sub>52</sub>NaO<sub>9</sub> [M+Na]<sup>+</sup> 783.3504; found 783.3501. Data for **47 $\beta$** :  $[\alpha]_{\text{D}}^{25} -4.7$  (c 0.3, CHCl<sub>3</sub>); R<sub>f</sub> 0.20 (4:1, hexane–EtOAc); <sup>1</sup>H NMR (CDCl<sub>3</sub>, 500 MHz)  $\delta_{\text{H}}$  7.36–7.20 (m, 25H, ArH), 4.79 (d, 1H,  $J_{\text{gem}} = 11.5$  Hz, ArCH<sub>2</sub>), 4.77 (d, 1H,  $J_{\text{gem}} = 10.6$  Hz, ArCH<sub>2</sub>), 4.72 (d, 1H,  $J_{1,2} = 1.9$  Hz, H-1), 4.65 (d, 1H,  $J_{\text{gem}} = 11.6$  Hz, ArCH<sub>2</sub>), 4.62 (d, 1H,  $J_{\text{gem}} = 11.6$  Hz, ArCH<sub>2</sub>), 4.61 (d, 1H,  $J_{\text{gem}} = 11.7$  Hz, ArCH<sub>2</sub>), 4.53 (d, 1H,  $J_{\text{gem}} = 11.7$  Hz, ArCH<sub>2</sub>), 4.48 (d, 1H,  $J_{\text{gem}} = 11.5$  Hz, ArCH<sub>2</sub>), 4.47 (d, 1H,  $J_{\text{gem}} = 12.4$  Hz, ArCH<sub>2</sub>), 4.44 (d, 1H,  $J_{\text{gem}} = 10.6$  Hz, ArCH<sub>2</sub>), 4.39–4.34 (m, 2H, H-4', ArCH<sub>2</sub>), 4.32 (d, 1H,  $J_{3,4'} = 5.0$  Hz, H-3'), 4.24 (dd, 1H,  $J_{2,1} = 1.9$  Hz,  $J_{2,3} = 3.0$  Hz, H-2), 4.16 (dd, 1H,  $J_{5'a,4'} = 6.4$  Hz,  $J_{\text{gem}} = 9.4$  Hz, H-5'a), 3.83 (dd, 1H,  $J_{5'b,4'} = 7.0$  Hz,  $J_{\text{gem}} = 9.4$  Hz, H-5'b), 3.81 (dd, 1H,  $J_{3,2} = 3.0$  Hz,  $J_{3,4} = 9.3$  Hz, H-3), 3.69 (d, 1H,  $J_{\text{gem}} = 10.8$  Hz, H-1'a), 3.66 (d, 1H,  $J_{\text{gem}} = 10.8$  Hz, H-1'b), 3.66–3.61 (m, 1H, H-5), 3.52 (app t, 1H,  $J_{4,3} = J_{4,5} = 9.3$  Hz, H-4), 3.31 (s, 3H, OCH<sub>3</sub>), 1.28

(d, 3H,  $J_{6,5} = 6.3$  Hz, H-6);  $^{13}\text{C}$  NMR ( $\text{CDCl}_3$ , 125 MHz)  $\delta_{\text{C}}$  139.0 (Ar), 138.7 (Ar), 138.2 (Ar), 137.9 (Ar), 128.42 (2C, Ar), 128.37 (2C, Ar), 128.35 (2C, Ar), 128.31 (2C, Ar), 128.2 (2C, Ar), 127.89 (2C, Ar), 127.86 (2C, Ar), 127.8 (2C, Ar), 127.71 (Ar), 127.68 (Ar), 127.61 (2C, Ar), 127.55 (Ar), 127.53 (2C, Ar), 127.4 (Ar), 127.3 (Ar), 105.9 (C-2'), 100.3 (C-1,  $J_{\text{C1,H1}} = 171.4$  Hz), 84.3 (C-3'), 82.9 (C-4'), 80.6 (C-4), 79.1 (C-3), 75.2 (ArCH<sub>2</sub>), 73.5 (ArCH<sub>2</sub>), 72.4 (ArCH<sub>2</sub>), 71.9 (ArCH<sub>2</sub>), 71.8 (ArCH<sub>2</sub>), 70.4 (C-1'), 69.8 (C-2), 69.7 (C-5'), 68.0 (C-5), 54.7 (OCH<sub>3</sub>), 18.0 (C-6); HRMS (ESI) calcd. for  $\text{C}_{47}\text{H}_{52}\text{NaO}_9$   $[\text{M}+\text{Na}]^+$  783.3504; found 783.3505.

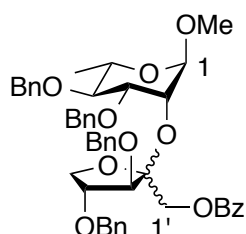

**Methyl 1-*O*-benzoyl-3,4-di-*O*-benzyl- $\alpha$ -D-*threo*-pent-2-ulofuranosyl-(2→2)-3,4-di-*O*-benzyl- $\alpha$ -L-rhamnopyranoside (48 $\alpha$ ) and Methyl 1-*O*-benzoyl-3,4-di-*O*-benzyl- $\beta$ -D-*threo*-pent-2-ulofuranosyl-(2→2)-3,4-di-*O*-benzyl- $\alpha$ -L-rhamnopyranoside (48 $\beta$ ).** A mixture of **10** (36.2 mg, 0.0669 mmol), **28**<sup>3</sup> (20.0 mg, 0.0558 mmol), and 4Å molecular sieves in  $\text{CH}_2\text{Cl}_2$  (1.86 mL) was stirred under an Ar atmosphere at room temperature for 30 min. The mixture was then cooled to  $-78$  °C and *N*-iodosuccinimide (18.1 mg, 0.0803 mmol) and silver triflate (1.7 mg, 6.69  $\mu\text{mol}$ ) were added. After stirring for 2 h at  $-78$  °C, triethylamine was added. The reaction was warmed to room temperature and then a small amount of water was added, followed by solid  $\text{Na}_2\text{S}_2\text{O}_3 \cdot 5\text{H}_2\text{O}$  until the solution was colorless. The solution was then dried over  $\text{MgSO}_4$ , filtered and the filtrate was concentrated under reduced pressure. The resulting



residue was purified by column chromatography (4:1, hexane–EtOAc) to give an inseparable mixture of **48 $\alpha$**  and **48 $\beta$**  (34.0 mg, 78%,  $\alpha/\beta = 2.4:1$ ) as a colorless oil;  $R_f$  0.28 (4:1, hexane–EtOAc);  $^1\text{H NMR}$  ( $\text{CDCl}_3$ , 500 MHz)  $\delta_{\text{H}}$  8.09–8.05 (m, 2H, ArH( $\alpha$ )), 8.03–7.99 (m, 2H, ArH( $\beta$ )), 7.60–7.56 (m, 1H, ArH( $\alpha$ )), 7.56–7.51 (m, 1H, ArH( $\beta$ )), 7.47–7.42 (m, 3H, ArH), 7.40–7.20 (m, 4H, ArH), 4.94 (d, 1H,  $J_{\text{gem}} = 11.7$  Hz, ArCH<sub>2</sub>( $\beta$ )), 4.89 (d, 1H,  $J_{\text{gem}} = 11.2$  Hz, ArCH<sub>2</sub>( $\alpha$ )), 4.77–4.74 (m, 3H, ArCH<sub>2</sub>( $\alpha$ ), ArCH<sub>2</sub>( $\beta$ ), H-1'a( $\beta$ )), 4.73–4.71 (m, 1H, H-1a( $\beta$ )), 4.67–4.62 (m, 3H, ArCH<sub>2</sub>( $\alpha$ ), ArCH<sub>2</sub>( $\beta$ ), H-1a( $\alpha$ )), 4.61 (d, 1H,  $J_{\text{gem}} = 11.6$  Hz, H-1'a( $\alpha$ )), 4.60 (d, 1H,  $J_{\text{gem}} = 11.9$  Hz, ArCH<sub>2</sub>( $\alpha$ )), 4.55–4.38 (m, 12H, 4 x ArCH<sub>2</sub>( $\alpha$ ), 5 x ArCH<sub>2</sub>( $\beta$ ), H-2( $\alpha$ ), H-1'b( $\beta$ ), H-4'( $\beta$ )), 4.33 (d, 1H,  $J_{3',4'} = 4.5$  Hz, H-3'( $\alpha$ )), 4.31–4.29 (m, 2H, H-2( $\beta$ ), H-3'( $\beta$ )), 4.22–4.18 (m, 1H, H-5'a( $\beta$ )), 4.14 (app dt, 1H,  $J_{4',3'} = 4.5$  Hz,  $J_{4',5'a} = J_{4',5'b} = 6.5$  Hz, H-4'( $\alpha$ )), 4.08 (dd, 1H,  $J_{5'a,4'} = 6.5$  Hz,  $J_{\text{gem}} = 9.4$  Hz, H-5'a( $\alpha$ )), 4.01 (dd, 1H,  $J_{5'b,4'} = 6.5$  Hz,  $J_{\text{gem}} = 9.4$  Hz, H-5'b( $\alpha$ )), 3.89–3.83 (m, 3H, H-3( $\alpha$ ), H-3( $\beta$ ), H-5'b( $\beta$ )), 3.67–3.63 (m, 2H, H-5( $\alpha$ ), H-5( $\beta$ )), 3.59–3.52 (m, 2H, H-4( $\alpha$ ), H-4( $\beta$ )), 3.32 (s, 3H, OCH<sub>3</sub>( $\beta$ )), 3.23 (s, 3H, OCH<sub>3</sub>( $\alpha$ )), 1.31 (d, 3H,  $J_{6,5} = 6.2$  Hz, H-6( $\alpha$ )), 1.29 (d, 3H,  $J_{6,5} = 6.2$  Hz, H-6( $\beta$ ));  $^{13}\text{C NMR}$  ( $\text{CDCl}_3$ , 125 MHz)  $\delta_{\text{C}}$  166.0 (C=O), 165.9 (C=O), 138.73 (Ar), 138.65 (Ar), 138.4 (Ar), 138.3 (Ar), 137.89 (Ar), 137.88 (Ar), 137.83 (Ar), 133.02 (Ar), 132.99 (Ar), 130.07 (Ar), 129.84 (Ar), 129.80 (Ar), 129.77 (Ar), 128.5 (Ar), 128.4 (Ar), 128.31 (Ar), 128.28 (Ar), 128.2 (Ar), 128.0 (Ar), 127.9 (Ar), 127.83 (Ar), 127.79 (Ar), 127.7 (Ar), 127.6 (Ar), 127.56 (Ar), 127.52 (Ar), 127.49 (Ar), 127.48 (Ar), 127.46 (Ar), 127.4 (Ar), 107.8 (C-2'( $\alpha$ )), 105.0 (C-2'( $\beta$ )), 100.9 (C-1( $\alpha$ ),  $J_{\text{C1,H1}} = 171.6$  Hz), 100.3 (C-1( $\beta$ ),  $J_{\text{C1,H1}} = 171.6$  Hz), 88.3 (C-3'( $\alpha$ )), 84.5 (C-3'( $\beta$ )), 83.0 (C-4'( $\beta$ )), 81.8 (C-4'( $\alpha$ )), 80.7 (C-4( $\beta$ )), 80.3 (C-4( $\alpha$ )), 79.2 (C-3( $\alpha$ )), 78.7 (C-3( $\beta$ )), 75.1 (2C, ArCH<sub>2</sub>( $\alpha$ ),

ArCH<sub>2</sub>(β)), 72.9 (ArCH<sub>2</sub>(β)), 72.5 (ArCH<sub>2</sub>(α)), 72.4 (ArCH<sub>2</sub>(α)), 72.1 (ArCH<sub>2</sub>(β)), 72.0 (ArCH<sub>2</sub>(β)), 71.9 (ArCH<sub>2</sub>(α)), 70.3 (C-2(β)), 70.2 (C-5'(α)), 70.0 (C-5'(β)), 69.4 (C-2(α)), 68.1 (C-5(α)), 68.0 (C-5(β)), 64.1 (C-1'(β)), 63.6 (C-1'(α)), 54.65 (OCH<sub>3</sub>(β)), 54.60 (OCH<sub>3</sub>(α)), 18.05 (C-6(α)), 18.0 (C-6(β)); HRMS (ESI) calcd. for C<sub>47</sub>H<sub>50</sub>NaO<sub>10</sub> [M+Na]<sup>+</sup> 797.3296; found 797.3283.

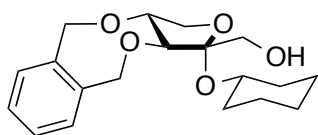

**Cyclohexyl 3,4-*O*-xylylidene- $\alpha$ -D-*threo*-pent-2-ulo-furanoside (49 $\alpha$ ).** To a solution of **36 $\alpha$**  (13.7 mg, 0.0312 mmol) in CH<sub>3</sub>OH (1.0 mL) was added sodium methoxide (0.13 mg, 0.00312 mmol) at room temperature. After stirring at room temperature for 30 min, the reaction mixture was neutralized by the addition of Amberlite IR-120 H<sup>+</sup> resin. The mixture was then filtered and the filtrate was concentrated under reduced pressure. The resulting residue was purified by column chromatography (3:1, hexane–EtOAc) to give **49 $\alpha$**  (8.8 mg, 84%) as a colorless oil.  $[\alpha]_D^{25} +105.1$  (*c* 0.9, CHCl<sub>3</sub>); TLC (2:1, hexane–EtOAc) R<sub>f</sub> 0.37; <sup>1</sup>H NMR (CDCl<sub>3</sub>, 500 MHz)  $\delta_H$  7.43–7.38 (m, 2H, ArH), 7.37–7.33 (m, 2H, ArH), 4.95 (d, 1H,  $J_{gem} = 12.7$  Hz, ArCH<sub>2</sub>), 4.91 (d, 1H,  $J_{gem} = 12.7$  Hz, ArCH<sub>2</sub>), 4.80 (d, 1H,  $J_{gem} = 12.7$  Hz, ArCH<sub>2</sub>), 4.76 (d, 1H,  $J_{gem} = 12.7$  Hz, ArCH<sub>2</sub>), 4.12 (ddd, 1H,  $J_{4,3} = 5.0$ ,  $J_{4,5a} = 7.7$  Hz,  $J_{4,5b} = 9.0$  Hz, H-4), 4.08 (d, 1H,  $J_{3,4} = 5.0$  Hz, H-3), 4.03 (dd, 1H,  $J_{5a,4} = 7.7$  Hz,  $J_{gem} = 8.4$  Hz, H-5a), 3.76 (dd, 1H,  $J_{5b,4} = 9.0$  Hz,  $J_{gem} = 8.4$  Hz, H-5b), 3.70–3.57 (m, 3H, cyclohexyl OCH, H-1a, H-1b), 2.66 (app t, 1H,  $J_{OH,H1a} = J_{OH,H1b} = 7.0$  Hz, OH), 1.84–1.64 (m, 4H, cyclohexyl CH<sub>2</sub>), 1.54–1.46 (m, 1H, cyclohexyl CH<sub>2</sub>), 1.35–1.17 (m, 4H, cyclohexyl CH<sub>2</sub>), 1.16–1.06 (m, 1H, cyclohexyl

*CH*<sub>2</sub>); <sup>13</sup>C NMR (CDCl<sub>3</sub>, 125 MHz) δ<sub>C</sub> 136.2 (Ar), 135.8 (Ar), 132.0 (Ar), 131.8 (Ar), 130.1 (Ar), 130.0 (Ar), 109.6 (C-2), 89.9 (C-3), 81.7 (C-4), 70.7 (cyclohexyl OCH), 69.8 (ArCH<sub>2</sub>), 68.9 (ArCH<sub>2</sub>), 68.1 (C-5), 62.3 (C-1), 35.1 (cyclohexyl CH<sub>2</sub>), 34.5 (cyclohexyl CH<sub>2</sub>), 25.5 (cyclohexyl CH<sub>2</sub>), 24.8 (2C, cyclohexyl CH<sub>2</sub>); HRMS (ESI) calcd. for C<sub>19</sub>H<sub>26</sub>NaO<sub>5</sub> [M+Na]<sup>+</sup> 357.1672; found 357.1667.

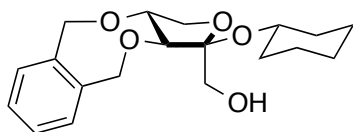

**Cyclohexyl 3,4-*O*-xylylidene-β-*D*-threo-pent-2-ulofuranoside (49β).** To a solution of **36β** (27.3 mg, 0.0623 mmol) in CH<sub>3</sub>OH (1.0 mL) was added sodium methoxide (0.25 mg, 0.00623 mmol) at room temperature. After stirring at room temperature for 30 min, the reaction mixture was neutralized by the addition of Amberlite IR-120 H<sup>+</sup> resin. The mixture was then filtered and the filtrate was concentrated under reduced pressure. The resulting residue was purified by column chromatography (2:1, hexane–EtOAc) to give **49β** (19.8 mg, 95%) as a colorless oil. **49β** was dissolved with minimal EtOAc, then slowly diffused with hexanes to obtain colorless crystal for X-ray crystallography. [α]<sub>D</sub><sup>25</sup> −7.3 (*c* 0.3, CHCl<sub>3</sub>); R<sub>f</sub> 0.27 (2:1, hexane–EtOAc); <sup>1</sup>H NMR (CDCl<sub>3</sub>, 500 MHz) δ<sub>H</sub> 7.40–7.32 (m, 4H, ArH), 5.05 (d, 1H, *J*<sub>gem</sub> = 12.9 Hz, ArCH<sub>2</sub>), 4.88 (d, 1H, *J*<sub>gem</sub> = 12.9 Hz, ArCH<sub>2</sub>), 4.86 (d, 1H, *J*<sub>gem</sub> = 12.9 Hz, 1H, ArCH<sub>2</sub>), 4.77 (d, 1H, *J*<sub>gem</sub> = 12.9 Hz, ArCH<sub>2</sub>), 4.39 (ddd, *J*<sub>4,3</sub> = 5.1 Hz, *J*<sub>4,5a</sub> = 7.7 Hz, *J*<sub>4,5b</sub> = 4.0 Hz, H-4), 4.23 (dd, 1H, *J*<sub>5a,4</sub> = 7.7 Hz, *J*<sub>gem</sub> = 9.3 Hz, H-5a), 4.13 (d, 1H, *J*<sub>3,4</sub> = 5.1 Hz, H-3), 3.75 (dd, 1H, *J*<sub>5b,4</sub> = 4.0 Hz, *J*<sub>gem</sub> = 9.3 Hz, H-5b), 3.67–3.60 (m, 3H, cyclohexyl OCH, H-1a, H-1b), 1.85–1.80 (m, 1H, cyclohexyl CH<sub>2</sub>), 1.78–1.67 (m, 4H, cyclohexyl CH<sub>2</sub>), 1.56–1.49 (m, 1H,

cyclohexyl CH<sub>2</sub>), 1.47–1.31 (m, 2H, cyclohexyl CH<sub>2</sub>), 1.29–1.16 (m, 1H, CH<sub>2</sub>), 1.14–1.03 (m, 1H, cyclohexyl CH<sub>2</sub>); <sup>13</sup>C NMR (CDCl<sub>3</sub>, 125 MHz) δ<sub>C</sub> 136.4 (Ar), 136.1 (Ar), 131.6 (2C, Ar), 129.53 (Ar), 129.51 (Ar), 106.8 (C-2), 84.0 (C-3), 80.9 (C-4), 71.0 (C-5), 70.8 (cyclohexyl OCH), 70.1 (ArCH<sub>2</sub>), 68.8 (ArCH<sub>2</sub>), 62.5 (C-1), 34.8 (cyclohexyl CH<sub>2</sub>), 34.4 (cyclohexyl CH<sub>2</sub>), 25.4 (cyclohexyl CH<sub>2</sub>), 25.1 (cyclohexyl CH<sub>2</sub>), 25.0 (cyclohexyl CH<sub>2</sub>); HRMS (ESI) calcd. for C<sub>19</sub>H<sub>26</sub>NaO<sub>5</sub> [M+Na]<sup>+</sup> 357.1672; found 357.1669.

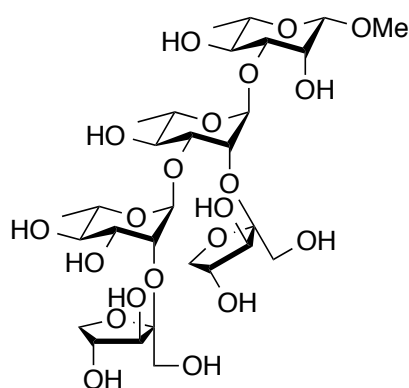

**Methyl  $\beta$ -D-*threo*-pent-2-ulofuranosyl-(2 $\rightarrow$ 2)- $\alpha$ -L-rhamnopyranosyl-(1 $\rightarrow$ 3)-[ $\beta$ -D-*threo*-pent-2-ulofuranosyl-(2 $\rightarrow$ 2)]- $\alpha$ -L-rhamnopyranosyl-(1 $\rightarrow$ 3)- $\beta$ -L-rhamnopyranoside (**50**).** To a solution of **59 $\beta$**  (10.3 mg, 6.56  $\mu$ mol) in EtOAc–CH<sub>3</sub>OH (1:1, 1.0 mL) was added Pd(OH)<sub>2</sub>/C (20 mg) at roomt. The reaction mixture was stirred under an H<sub>2</sub> atmosphere by exchange of three cycles of vacuum/H<sub>2</sub>. After stirring for 1 h, the reaction mixture was filtered and the filtrate was concentrated under reduced pressure. The resulting residue was purified by gel filtration chromatography (Sephadex, LH-20) with 1:1 CH<sub>3</sub>OH–H<sub>2</sub>O as the eluent to give **50** (4.3 mg, 89%) as a colorless oil. [ $\alpha$ ]<sub>D</sub><sup>25</sup> –9.7 (c 0.4, H<sub>2</sub>O); R<sub>f</sub> 0.21 (10:2:1:0.5, EtOAc–CH<sub>3</sub>OH–H<sub>2</sub>O–AcOH); <sup>1</sup>H NMR (D<sub>2</sub>O, 500 MHz)  $\delta$  5.32 (br s, 1H), 5.15 (m, 1H), 4.62 (br s, 1H),

4.49–4.43 (m, 2H), 4.36–4.33 (m, 1H), 4.30–4.27 (m, 1H), 4.21–4.08 (m, 5H), 3.94–3.68 (m, 12H), 3.64–3.52 (m, 2H), 3.58 (s, 3H,  $OCH_3$ ), 3.51–3.45 (m), 1.40 (d, 3H,  $J = 6.4$  Hz), 1.38 (d, 3H,  $J = 6.4$  Hz), 1.36 (d, 3H,  $J = 6.4$  Hz);  $^{13}C$  NMR ( $D_2O$ , 125 MHz)  $\delta$  106.07, 106.01, 101.9, 101.83, 101.75, 80.2, 79.5, 78.3, 75.6, 75.0, 73.5, 73.0, 72.9, 72.8, 71.90, 71.87, 71.27, 71.23, 71.19, 70.4, 70.33, 70.25, 61.5, 57.8, 17.7, 17.5, 17.3; HRMS (ESI) calcd. for  $C_{29}H_{50}NaO_{21}$   $[M+Na]^+$  757.2737; found 757.2740.

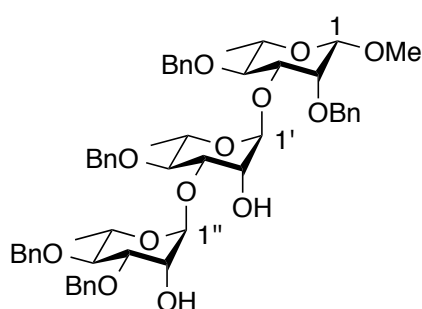

**Methyl 3,4-di-O-benzyl- $\alpha$ -L-rhamnopyranosyl-(1 $\rightarrow$ 3)-4-O-benzyl- $\alpha$ -L-rhamnopyranosyl-(1 $\rightarrow$ 3)-2,4-di-O-benzyl- $\beta$ -L-rhamnopyranoside (51).** To a solution of **58** (23.0 mg, 0.0277 mmol) in toluene (10.0 mL) was added di-*n*-butyltin oxide (10.3 mg, 0.0415 mmol) and the reaction mixture was stirred at reflux for 3 h. The mixture was then cooled to room temperature before tetrabutylammonium bromide (13.4 mg, 0.0415 mmol) and benzyl bromide (7.1 mg, 4.9  $\mu$ L, 0.0415 mmol) were added. After stirring for 1 h at reflux, the solution was then cooled to room temperature and concentrated under reduced pressure. The resulting residue was purified by column chromatography (2:1, hexane–EtOAc) to give **51** (24.4 mg, 96%) as a colorless oil.  $[\alpha]_D^{25} +1.2$  ( $c$  1.0,  $CHCl_3$ );  $R_f$  0.67 (1:1, hexane–EtOAc);  $^1H$  NMR ( $CDCl_3$ , 700 MHz)  $\delta_H$  7.46–7.42 (m, 2H, ArH), 7.39–7.27 (m, 22H, ArH), 7.21–7.16 (m, 1H, ArH), 5.11–5.08 (m, 2H, H-1', H-1''), 5.04 (d, 1H,  $J_{gem} = 12.8$  Hz, ArCH<sub>2</sub>), 4.88 (d, 1H,  $J_{gem} = 11.0$

Hz, ArCH<sub>2</sub>), 4.76 (d, 1H,  $J_{\text{gem}} = 11.0$  Hz, ArCH<sub>2</sub>), 4.72 (d, 1H,  $J_{\text{gem}} = 12.8$  Hz, ArCH<sub>2</sub>), 4.67–4.60 (m, 5H, ArCH<sub>2</sub>), 4.55 (d, 1H,  $J_{\text{gem}} = 11.0$  Hz, ArCH<sub>2</sub>), 4.36 (br s, 1H, H-1), 4.02–3.99 (m, 1H, H-2''), 3.95 (dd, 1H,  $J_{3'',2''} = 3.6$  Hz,  $J_{3'',4''} = 9.2$  Hz, H-3''), 3.94–3.92 (m, 1H, H-2'), 3.85–3.78 (m, 3H, H-2, H-3', H-5'), 3.69–3.61 (m, 3H, H-3, H-4, H-5''), 3.54 (s, 3H, OCH<sub>3</sub>), 3.49 (app t, 1H,  $J_{4',3'} = J_{4',5'} = 9.2$  Hz, H-4'), 3.39 (app t, 1H,  $J_{4'',3''} = J_{4'',5''} = 9.2$  Hz, H-4''), 3.34 (app dq, 1H,  $J_{5,6} = 6.2$  Hz,  $J_{5,4} = 8.8$  Hz, H-5), 2.39 (d, 1H,  $J_{\text{OH},2'} = 1.9$  Hz, 2'-OH), 2.03 (d, 1H,  $J_{\text{OH},2''} = 3.0$  Hz, 2''-OH), 1.39 (d, 3H,  $J_{6,5} = 6.2$  Hz, H-6), 1.27 (d, 3H,  $J_{6'',5''} = 6.2$  Hz, H-6''), 1.19 (d, 3H,  $J_{6',5'} = 6.2$  Hz, H-6'); <sup>13</sup>C NMR (CDCl<sub>3</sub>, 175 MHz)  $\delta_{\text{C}}$  138.8 (Ar), 138.5 (Ar), 138.3 (Ar), 138.1 (Ar), 138.0 (Ar), 128.72 (2C, Ar), 128.70 (2C, Ar), 128.61 (2C, Ar), 128.56 (2C, Ar), 128.4 (2C, Ar), 128.2 (2C, Ar), 128.1 (2C, Ar), 128.04 (Ar), 128.0 (Ar), 127.97 (2C, Ar), 127.89 (2C, Ar), 127.84 (Ar), 127.7 (2C, Ar), 127.6 (Ar), 102.7 (C-1,  $J_{\text{C}1,\text{H}1} = 153.5$  Hz), 101.6 (C-1',  $J_{\text{C}1',\text{H}1'} = 171.8$  Hz), 101.0 (C-1'',  $J_{\text{C}1'',\text{H}1''} = 171.8$  Hz), 81.0 (C-4), 80.6 (C-3), 80.3 (C-4''), 79.90 (C-4'), 79.89 (C-3''), 79.5 (C-3'), 78.4 (C-2), 75.7 (ArCH<sub>2</sub>), 75.6 (ArCH<sub>2</sub>), 75.2 (ArCH<sub>2</sub>), 74.6 (ArCH<sub>2</sub>), 72.3 (ArCH<sub>2</sub>), 72.1 (C-5), 71.3 (C-2''), 69.0 (C-2'), 68.5 (C-5'), 68.2 (C-5''), 57.3 (OCH<sub>3</sub>), 18.12 (C-6'), 18.08 (C-6), 17.98 (C-6''); HRMS (ESI) calcd. for C<sub>54</sub>H<sub>64</sub>NaO<sub>13</sub> [M+Na]<sup>+</sup> 943.4239; found 943.4228.

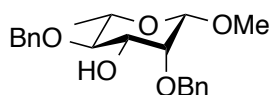

**Methyl 2,4-di-O-benzyl- $\beta$ -L-rhamnopyranoside (52).** To a solution of **S2**<sup>4</sup> (430 mg, 1.44 mmol) in DMF (14.4 mL) was added benzyl bromide (590 mg, 410  $\mu$ L, 3.46 mmol) and 60% NaH (173 mg, 4.32 mmol) at room temperature. After 1 h, CH<sub>3</sub>OH was added.

The mixture was concentrated and then diluted with CH<sub>2</sub>Cl<sub>2</sub>, and then washed with brine and water. The organic layers were dried with MgSO<sub>4</sub> and then filtered. The filtrate was concentrated and dried *in vacuo*. To a solution of resulting residue in CH<sub>2</sub>Cl<sub>2</sub>-H<sub>2</sub>O (9:1, 15 mL) was added DDQ (489 mg, 2.16 mmol) at room temperature and the reaction mixture was stirred for 30 min. After the completion of reaction, the reaction mixture was diluted with EtOAc and washed with satd aq NaHCO<sub>3</sub> and brine. The organic layer was then dried with MgSO<sub>4</sub>, filtered and the filtrate was concentrated. The resulting residue was purified by column chromatography (4:1, hexane-EtOAc) to give **52** (454 mg, 88%) as a colorless oil. [ $\alpha$ ]<sub>D</sub><sup>25</sup> +95.4 (*c* 0.7, CHCl<sub>3</sub>); R<sub>f</sub> 0.31 (4:1, hexane-EtOAc); <sup>1</sup>H NMR (CDCl<sub>3</sub>, 500 MHz)  $\delta$ <sub>H</sub> 7.43–7.27 (m, 10H, ArH), 5.08 (d, 1H, *J*<sub>gem</sub> = 11.9 Hz, ArCH<sub>2</sub>), 4.93 (d, 1H, *J*<sub>gem</sub> = 11.0 Hz, ArCH<sub>2</sub>), 4.64 (d, 1H, *J*<sub>gem</sub> = 11.0 Hz, ArCH<sub>2</sub>), 4.63 (d, 1H, *J*<sub>gem</sub> = 11.9 Hz, ArCH<sub>2</sub>), 4.37 (d, 1H, *J*<sub>1,2</sub> = 0.8 Hz, H-1), 3.83 (dd, 1H, *J*<sub>2,1</sub> = 0.8 Hz, *J*<sub>2,3</sub> = 3.7 Hz, H-2), 3.64 (ddd, 1H, *J*<sub>3,2</sub> = 3.7 Hz, *J*<sub>3,4</sub> = 8.9 Hz, *J*<sub>3,OH</sub> = 9.8 Hz, H-3), 3.56 (s, 3H, OCH<sub>3</sub>), 3.32 (app dq, 1H, *J*<sub>5,6</sub> = 6.1 Hz, *J*<sub>5,4</sub> = 8.9 Hz, H-5), 3.28 (app t, 1H, *J*<sub>4,3</sub> = *J*<sub>4,5</sub> = 8.9 Hz, H-4), 2.41 (d, 1H, *J*<sub>OH,3</sub> = 9.8 Hz, OH), 1.41 (d, 3H, *J*<sub>6,5</sub> = 6.1 Hz, H-6); <sup>13</sup>C NMR (CDCl<sub>3</sub>, 125 MHz)  $\delta$ <sub>C</sub> 138.48 (Ar), 138.46 (Ar), 128.5 (2C, Ar), 128.4 (2C, Ar), 128.2 (2C, Ar), 128.0 (2C, Ar), 127.9 (Ar), 127.7 (Ar), 102.7 (C-1, *J*<sub>C1, H1</sub> = 153.1 Hz), 82.2 (C-4), 78.1 (C-2), 75.1 (ArCH<sub>2</sub>), 75.0 (ArCH<sub>2</sub>), 74.0 (C-3), 71.4 (C-5), 57.1 (OCH<sub>3</sub>), 18.0 (C-6); HRMS (ESI) calcd. for C<sub>21</sub>H<sub>26</sub>NaO<sub>5</sub> [M+Na]<sup>+</sup> 381.1672; found 381.1680.

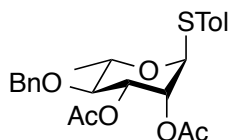

***p*-Tolyl 2,3-di-*O*-acetyl-4-*O*-benzyl-1-thio- $\alpha$ -L-rhamnopyranoside (53).** To a solution of **S3**<sup>5</sup> (70 mg, 0.175 mmol) in CH<sub>2</sub>Cl<sub>2</sub> (2 mL) was added triethylamine (44.2 mg, 60.6  $\mu$ L, 0.437 mmol), acetic anhydride (44.6 mg, 41.3  $\mu$ L, 0.437 mmol) and 4-dimethylaminopyridine (2.1 mg, 0.0175 mmol) and the reaction mixture was stirred for 30 min. Excess acetic anhydride was quenched by the addition of CH<sub>3</sub>OH and the solution was then concentrated under reduced pressure. The resulting residue was purified by column chromatography (4:1, hexane–EtOAc) to give **53** (71.5 mg, 92%) as a colorless syrup.  $[\alpha]^{25}_{\text{D}} -111.3$  (*c* 1.0, CHCl<sub>3</sub>); *R*<sub>f</sub> 0.63 (2:1, hexane–EtOAc); <sup>1</sup>H NMR (CDCl<sub>3</sub>, 700 MHz)  $\delta_{\text{H}}$  7.37–7.33 (m, 4H, ArH), 7.32–7.27 (m, 3H, ArH), 7.12 (d, 1H, *J* = 8.1 Hz, ArH), 5.49 (dd, 1H, *J*<sub>2,1</sub> = 1.7 Hz, *J*<sub>2,3</sub> = 3.4 Hz, H-2), 5.32 (dd, 1H, *J*<sub>3,2</sub> = 3.4 Hz, *J*<sub>3,4</sub> = 9.6 Hz, H-3), 5.29 (d, 1H, *J*<sub>1,2</sub> = 1.7 Hz, H-1), 4.72 (d, 1H, *J*<sub>gem</sub> = 11.3 Hz, ArCH<sub>2</sub>), 4.66 (d, 1H, *J*<sub>gem</sub> = 11.3 Hz, ArCH<sub>2</sub>), , 4.31 (app dq, 1H, *J*<sub>5,4</sub> = 9.6 Hz, *J*<sub>5,6</sub> = 6.3 Hz, H-5), 3.57 (app t, 1H, *J*<sub>4,3</sub> = *J*<sub>4,5</sub> = 9.6 Hz, H-4), 2.32 (s, 3H, ArCH<sub>3</sub>), 2.12 (s, 3H, CH<sub>3</sub>CO), 1.99 (s, 3H, CH<sub>3</sub>CO), 1.36 (d, 3H, *J*<sub>6,5</sub> = 6.3 Hz, H-6); <sup>13</sup>C NMR (CDCl<sub>3</sub>, 175 MHz)  $\delta_{\text{C}}$  170.0 (C=O), 169.8 (C=O), 138.06 (Ar), 138.05 (Ar), 132.6 (2C, Ar), 129.9 (2C, Ar), 129.8 (Ar), 128.5 (2C, Ar), 127.9 (Ar), 127.7 (2C, Ar), 86.1 (C-1, *J*<sub>C1,H1</sub> = 172.3 Hz), 79.0 (C-4), 75.1 (ArCH<sub>2</sub>), 71.9 (C-3), 71.9 (C-2), 69.1 (C-5), 21.1 (ArCH<sub>3</sub>), 21.0 (CH<sub>3</sub>CO), 20.9 (CH<sub>3</sub>CO), 17.9 (C-6); HRMS (ESI) calcd. for C<sub>24</sub>H<sub>28</sub>NaO<sub>6</sub>S [M+Na]<sup>+</sup> 467.1499; found 467.1496.



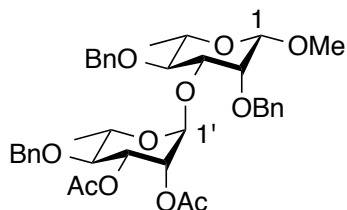

**Methyl 2,3-di-O-acetyl-4-O-benzyl- $\alpha$ -L-rhamnopyranosyl-(1 $\rightarrow$ 3)-2,4-di-O-benzyl- $\beta$ -L-rhamnopyranoside (54).** A mixture of the **53** (45.4 mg, 0.102 mmol) and **52** (33.3 mg, 0.093 mmol) and 4Å molecular sieves in CH<sub>2</sub>Cl<sub>2</sub> (1.0 mL) was stirred under an Ar atmosphere at room temperature for 30 min. The mixture was then cooled to 0 °C and *N*-iodosuccinimide (27.5 mg, 0.122 mmol) and silver triflate (2.6 mg, 0.0102 mmol) were added. After stirring for 15 min, triethylamine was added. The reaction mixture was warmed to room temperature and then a small amount of water was added, followed by solid Na<sub>2</sub>S<sub>2</sub>O<sub>3</sub>·5H<sub>2</sub>O until the solution was colorless. The solution was then dried over MgSO<sub>4</sub>, filtered and the filtrate was concentrated under reduced pressure. The resulting residue was purified by column chromatography (4:1, hexane–EtOAc) to give **54** (55.5 mg, 88%) as a colorless oil.  $[\alpha]_D^{25} +4.6$  (*c* 0.9, CHCl<sub>3</sub>); *R<sub>f</sub>* 0.27 (4:1, hexane–EtOAc); <sup>1</sup>H NMR (CDCl<sub>3</sub>, 700 MHz)  $\delta_H$  7.50–7.47 (m, 2H, ArH), 7.36–7.28 (m, 9H, ArH), 7.27–7.24 (m, 3H, ArH), 7.19–7.15 (m, 1H, ArH), 5.41 (dd, 1H,  $J_{2',1'} = 1.9$  Hz,  $J_{2',3'} = 3.5$  Hz, H-2'), 5.39 (dd, 1H,  $J_{3',2'} = 3.5$  Hz,  $J_{3',4'} = 9.7$  Hz, H-3'), 5.05 (d, 1H,  $J_{gem} = 12.2$  Hz, ArCH<sub>2</sub>), 5.04 (d, 1H,  $J_{1',2'} = 1.9$  Hz, H-1'), 4.83 (d, 1H,  $J_{gem} = 11.0$  Hz, ArCH<sub>2</sub>), 4.78 (d, 1H,  $J_{gem} = 12.2$  Hz, ArCH<sub>2</sub>), 4.66 (d, 2H,  $J_{gem} = 11.0$  Hz, ArCH<sub>2</sub>), 4.58 (d, 1H,  $J_{gem} = 11.0$  Hz, ArCH<sub>2</sub>) 4.34 (br s, 1H, H-1), 3.81 (d, 1H,  $J_{2,3} = 1.8$  Hz, H-2), 3.75 (app dq, 1H,  $J_{5',6'} = 6.2$  Hz,  $J_{5',4'} = 9.7$  Hz, H-5'), 3.68–3.66 (m, 2H, H-3, H-4), 3.53 (s, 3H, OCH<sub>3</sub>), 3.44 (app t,  $J_{4',3'} = J_{4',5'} = 9.7$  Hz, H-4'), 3.33 (app dq,

1H,  $J_{5,6} = 6.3$  Hz,  $J_{5,4} = 9.3$  Hz, H-5), 2.05 (s, 3H, CH<sub>3</sub>CO), 1.97 (s, 3H, CH<sub>3</sub>CO), 1.38 (d, 3H,  $J_{6,5} = 6.3$  Hz, H-6), 1.21 (d, 3H,  $J_{6',5'} = 6.3$  Hz, H-6'); <sup>13</sup>C NMR (CDCl<sub>3</sub>, 175 MHz)  $\delta_C$  169.74 (C=O), 169.65 (C=O), 138.5 (Ar), 138.3 (Ar), 138.1 (Ar), 128.33 (2C, Ar), 128.31 (2C, Ar), 128.25 (2C, Ar), 128.0 (2C, Ar), 127.9 (2C, Ar), 127.6 (2C, Ar), 127.4 (2C, Ar), 102.6 (C-1,  $J_{C1,H1} = 153.5$  Hz), 99.5 (C-1',  $J_{C1',H1'} = 175.6$  Hz), 80.6 (C-3), 80.5 (C-4), 78.6 (C-4'), 77.6 (C-2), 75.4 (ArCH<sub>2</sub>), 74.6 (ArCH<sub>2</sub>), 74.2 (ArCH<sub>2</sub>), 72.0 (C-5), 71.5 (C-3'), 70.3 (C-2'), 68.2 (C-5'), 57.1 (OCH<sub>3</sub>), 20.9 (CH<sub>3</sub>CO), 20.8 (CH<sub>3</sub>CO), 17.93 (C-6), 17.90 (C-6'); HRMS (ESI) calcd. for C<sub>38</sub>H<sub>46</sub>NaO<sub>11</sub> [M+Na]<sup>+</sup> 701.2932; found 701.2932.

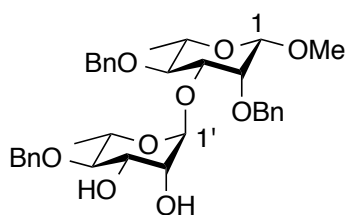

**Methyl 4-O-benzyl- $\alpha$ -L-rhamnopyranosyl-(1 $\rightarrow$ 3)-2,4-di-O-benzyl- $\beta$ -L-rhamnopyranoside (55).** To a solution of **54** (48 mg, 0.076 mmol) in CH<sub>3</sub>OH (1 mL) was added sodium methoxide (0.3 mg, 7.6  $\mu$ mol) and the reaction mixture was stirred at room temperature for 1 h. The reaction mixture was then neutralized by the addition of Amberlite IR-120 H<sup>+</sup> resin. The reaction mixture was filtered and then concentrated under reduced pressure. The resulting residue was purified by column chromatography (1:1, hexane–EtOAc) to give **55** (39 mg, 87%) as a colorless oil.  $[\alpha]_D^{25} +31.9$  (*c* 0.3, CHCl<sub>3</sub>);  $R_f$  0.23 (1:1, hexane–EtOAc); <sup>1</sup>H NMR (CDCl<sub>3</sub>, 500 MHz)  $\delta_H$  7.44–7.40 (m, 2H, ArH), 7.38–7.27 (m, 12H, ArH), 7.23–7.18 (m, 1H, ArH), 5.06 (d, 1H,  $J_{1',2'} = 1.4$  Hz, H-1'), 5.00 (d, 1H,  $J_{gem} = 12.3$  Hz, ArCH<sub>2</sub>), 4.74–4.65 (m, 5H, ArCH<sub>2</sub>), 4.35 (s, 1H,

H-1), 3.87 (app dt, 1H,  $J_{2',1'} = 1.4$  Hz,  $J_{2',3'} = J_{2',\text{OH}} = 3.6$  Hz, H-2'), 3.83 (ddd, 1H,  $J_{3',2'} = 3.6$  Hz,  $J_{3',4'} = 9.4$  Hz,  $J_{3',\text{OH}'} = 4.9$  Hz, H-3'), 3.78 (d, 1H,  $J_{2,3} = 2.5$  Hz, H-2), 3.69–3.64 (m, 2H, H-3, H-5'), 3.61 (app t, 1H,  $J_{4,3} = J_{4,5} = 9.6$  Hz, H-4), 3.52 (s, 3H, OCH<sub>3</sub>), 3.33 (app dq, 1H,  $J_{5,4} = 9.6$  Hz,  $J_{5,6} = 6.2$  Hz, H-5), 3.29 (app t,  $J_{4',3'} = J_{4',5'} = 9.4$  Hz, H-4'), 2.22 (d, 1H,  $J_{\text{OH},3'} = 4.9$  Hz, OH), 2.02 (d, 1H,  $J_{\text{OH},2'} = 3.6$  Hz, OH), 1.39 (d, 3H,  $J_{6,5} = 6.2$  Hz, H-6), 1.22 (d, 3H,  $J_{6',5'} = 6.2$  Hz, H-6'); <sup>13</sup>C NMR (CDCl<sub>3</sub>, 125 MHz)  $\delta_{\text{C}}$  138.8 (Ar), 138.5 (Ar), 138.2 (Ar), 128.6 (4C, Ar), 128.2 (2C, Ar), 127.9 (4C, Ar), 127.8 (2C, Ar), 127.75 (2C, Ar), 127.4 (Ar), 102.6 (C-1,  $J_{\text{C}1,\text{H}1} = 153.1$  Hz), 101.5 (C-1',  $J_{\text{C}1',\text{H}1'} = 172.3$  Hz), 81.5 (C-4'), 81.3 (C-4), 80.2 (C-3), 78.0 (C-2), 75.6 (ArCH<sub>2</sub>), 74.7 (ArCH<sub>2</sub>), 74.3 (ArCH<sub>2</sub>), 72.1 (C-5), 71.3 (C-2'), 71.2 (C-3'), 67.9 (C-5'), 57.2 (OCH<sub>3</sub>), 18.0 (2C, C-6, C-6'); HRMS (ESI) calcd. for C<sub>34</sub>H<sub>42</sub>NaO<sub>9</sub> [M+Na]<sup>+</sup> 617.2721; found 617.2734.

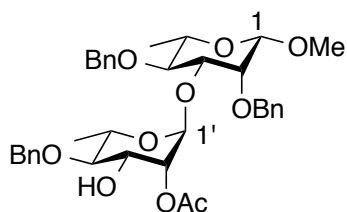

**Methyl 2-O-acetyl-4-O-benzyl- $\alpha$ -L-rhamnopyranosyl-(1 $\rightarrow$ 3)-2,4-di-O-benzyl- $\beta$ -L-rhamnopyranoside (56).** To a solution of **55** (35.5 mg, 0.060 mmol) in acetonitrile (1.0 mL) was added triethyl orthoacetate (8.6 mg, 9.2 mL, 0.072 mmol) and *p*-toluenesulfonic acid (1.0 mg, 6.0  $\mu$ mol) at room temperature. After stirring for 1 h, triethylamine was added and the solution was concentrated. The residue was then dried *in vacuo* for 30 min. The residue was then dissolved in 80% aq AcOH and stirred for 30 min at room temperature. The reaction mixture was then diluted with EtOAc and

washed with water, satd aq NaHCO<sub>3</sub> and brine. The organic layer was then dried with MgSO<sub>4</sub>, filtered and the filtrate was concentrated. The resulting residue was purified by column chromatography (4:1, hexane–EtOAc) to give **56** (31.3 mg, 88% over two steps) as a colorless oil.  $[\alpha]_D^{25} +18.1$  (*c* 1.7, CHCl<sub>3</sub>); R<sub>f</sub> 0.21 (4:1, hexane–EtOAc); <sup>1</sup>H NMR (CDCl<sub>3</sub>, 700 MHz) δ<sub>H</sub> 7.44–7.41 (m, 2H, ArH), 7.37–7.26 (m, 12H, ArH), 7.22–7.18 (m, 1H, ArH), 5.23 (dd, 1H, *J*<sub>2',1'</sub> = 1.7 Hz, *J*<sub>2',3'</sub> = 3.6 Hz, H-2'), 5.05 (d, 1H, *J*<sub>1',2'</sub> = 1.7 Hz, H-1'), 5.02 (d, 1H, *J*<sub>gem</sub> = 12.2 Hz, ArCH<sub>2</sub>), 4.83 (d, 1H, *J*<sub>gem</sub> = 11.1 Hz, ArCH<sub>2</sub>), 4.77 (d, 1H, *J*<sub>gem</sub> = 11.3 Hz, ArCH<sub>2</sub>), 4.70 (d, 1H, *J*<sub>gem</sub> = 12.3 Hz, ArCH<sub>2</sub>), 4.65 (d, 1H, *J*<sub>gem</sub> = 11.3 Hz, ArCH<sub>2</sub>), 4.63 (d, 1H, *J*<sub>gem</sub> = 11.1 Hz, ArCH<sub>2</sub>), 4.33 (d, 1H, *J*<sub>1,2</sub> = 0.5 Hz, H-1), 4.02 (app dt, 1H, *J*<sub>3',2'</sub> = *J*<sub>3',OH</sub> = 3.9 Hz, *J*<sub>3',4'</sub> = 8.9 Hz, H-3'), 3.78 (dd, 1H, *J*<sub>2,1</sub> = 0.5 Hz, *J*<sub>2,3</sub> = 2.9 Hz, H-2), 3.70 (app dq, 1H, *J*<sub>5',6'</sub> = 6.3 Hz, *J*<sub>5',4'</sub> = 9.5 Hz, H-5'), 3.67 (dd, 1H, *J*<sub>3,2</sub> = 2.8 Hz, *J*<sub>3,4</sub> = 9.5 Hz, H-3), 3.63 (app t, 1H, *J*<sub>4,3</sub> = *J*<sub>4,5</sub> = 9.5 Hz, H-4), 3.51 (s, 3H, OCH<sub>3</sub>), 3.31 (app dq, *J*<sub>5,6</sub> = 6.3 Hz, *J*<sub>5,4</sub> = 9.1 Hz, H-5), 3.30 (app t, *J*<sub>4',3'</sub> = *J*<sub>4',5'</sub> = 9.4 Hz, H-4'), 2.07 (s, 3H, CH<sub>3</sub>CO), 2.02 (d, 1H, *J*<sub>OH, 3'</sub> = 3.9 Hz, OH), 1.35 (d, 3H, *J*<sub>6,5</sub> = 6.2 Hz, H-6), 1.24 (d, 3H, *J*<sub>6',5'</sub> = 6.2 Hz, H-6'); <sup>13</sup>C NMR (CDCl<sub>3</sub>, 175 MHz) δ<sub>C</sub> 170.6 (C=O), 138.7 (Ar), 138.5 (Ar), 138.1 (Ar), 128.5 (2C, Ar), 128.4 (2C, Ar), 128.2 (2C, Ar), 128.1 (2C, Ar), 127.8 (Ar), 127.7 (2C, Ar), 127.3 (Ar), 102.5 (C-1), 99.3 (C-1'), 81.4 (C-4'), 80.8 (C'4), 80.1 (C-3), 78.0 (C-2), 75.4 (ArCH<sub>2</sub>), 74.8 (ArCH<sub>2</sub>), 74.4 (ArCH<sub>2</sub>), 72.6 (C-2'), 72.1 (C-5), 70.2 (C-3'), 68.1 (C-5'), 57.1 (OCH<sub>3</sub>), 21.0 (CH<sub>3</sub>CO), 18.01 (C-6), 17.96 (C-6)'; HRMS (ESI) calcd. for C<sub>36</sub>H<sub>44</sub>NaO<sub>10</sub> [M+Na]<sup>+</sup> 659.2827; found 659.2826.

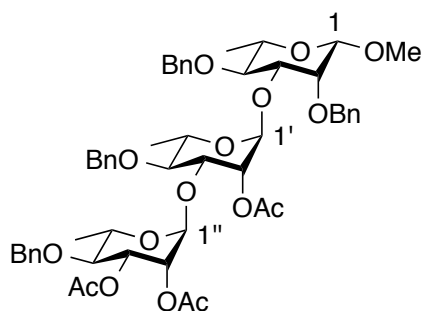

**Methyl 2,3-di-*O*-acetyl-4-*O*-benzyl- $\alpha$ -L-rhamnopyranosyl-(1 $\rightarrow$ 3)-2-*O*-acetyl-4-*O*-benzyl- $\alpha$ -L-rhamnopyranosyl-(1 $\rightarrow$ 3)-2,4-di-*O*-benzyl- $\beta$ -L-rhamnopyranoside (57).**

A mixture of **53** (34.1 mg, 0.0767 mmol), **56** (40.7 mg, 0.0639 mmol) and 4Å molecular sieves in CH<sub>2</sub>Cl<sub>2</sub> (2.0 mL) was stirred under an Ar atmosphere at room temperature for 30 min. The mixture was then cooled to 0 °C and then *N*-iodosuccinimide (20.7 mg, 0.0920 mmol) and silver triflate (2.0 mg, 7.7 μmol) were added. After stirring for 30 min, triethylamine was added. The solution was warmed to room temperature and then a small amount of water was added, followed by solid Na<sub>2</sub>S<sub>2</sub>O<sub>3</sub>·5H<sub>2</sub>O until the solution was colorless. The solution was then dried over MgSO<sub>4</sub>, filtered and the filtrate was concentrated under reduced pressure. The resulting residue was purified by column chromatography (4:1, hexane–EtOAc) to give **57** (58.1 mg, 95%) as a colorless syrup.  $[\alpha]_D^{25}$  –8.0 (*c* 0.9, CHCl<sub>3</sub>); *R<sub>f</sub>* 0.37 (4:1, hexane–EtOAc); <sup>1</sup>H NMR (CDCl<sub>3</sub>, 700 MHz)  $\delta$ <sub>H</sub> 7.44–7.41 (m, 2H, ArH), 7.38–7.35 (m, 2H, ArH), 7.34–7.30 (m, 6H, ArH), 7.30–7.26 (m, 9H, ArH), 7.18–7.15 (m, 1H, ArH), 5.34 (dd, 1H, *J*<sub>2',1'</sub> = 1.7 Hz, *J*<sub>2',3'</sub> = 3.3 Hz, H-2'), 5.31 (dd, 1H, *J*<sub>2'',1''</sub> = 2.0 Hz, *J*<sub>2'',3''</sub> = 3.2 Hz, H-2''), 5.27 (dd, 1H, *J*<sub>3'',2''</sub> = 3.2 Hz, *J*<sub>3'',4''</sub> = 9.6 Hz, H-3''), 5.07 (d, 1H, *J*<sub>1',2'</sub> = 1.5 Hz, H-1'), 5.04 (d, 1H, *J*<sub>gem</sub> = 12.1 Hz, ArCH<sub>2</sub>), 4.93 (d, 1H, *J*<sub>1'',2''</sub> = 1.8 Hz, H-1''), 4.90 (d, 1H, *J*<sub>gem</sub> = 10.8 Hz, ArCH<sub>2</sub>), 4.80 (d, 1H, *J*<sub>gem</sub> = 11.2 Hz, ArCH<sub>2</sub>), 4.68 (d, 1H, *J*<sub>gem</sub> = 12.1 Hz, ArCH<sub>2</sub>), 4.67 (d, 1H, *J*<sub>gem</sub> = 11.6 Hz, ArCH<sub>2</sub>), 4.62 (d, 1H, *J*<sub>gem</sub> = 11.6 Hz, ArCH<sub>2</sub>), 4.61 (d, 1H,

$J_{\text{gem}} = 11.2$  Hz, ArCH<sub>2</sub>), 4.57 (d, 1H,  $J_{\text{gem}} = 10.8$  Hz, ArCH<sub>2</sub>), 4.33 (br s, 1H, H-1), 4.08 (dd, 1H,  $J_{3',2'} = 3.4$  Hz,  $J_{3',4'} = 9.6$  Hz, H-3'), 3.90 (app dq, 1H,  $J_{5'',6''} = 6.4$  Hz,  $J_{5'',4''} = 9.6$  Hz, H-5''), 3.79 (d, 1H,  $J_{2,3} = 2.8$  Hz, H-2), 3.70 (app dq, 1H,  $J_{5',6'} = 6.4$  Hz,  $J_{5',4'} = 9.7$  Hz, H-5'), 3.67 (dd, 1H,  $J_{3,2} = 2.8$  Hz,  $J_{3,4} = 9.4$  Hz, H-3), 3.63 (app t, 1H,  $J_{4,3} = J_{4,5} = 9.4$  Hz, H-4), 3.52 (s, 3H, OCH<sub>3</sub>), 3.46 (app t, 1H,  $J_{4'',3''} = J_{4'',5''} = 9.4$  Hz, H-4''), 3.45 (app t,  $J_{4',3'} = J_{4',5'} = 9.4$  Hz, H-4'), 3.30 (app dq, 1H,  $J_{5,6} = 6.2$  Hz,  $J_{5,4} = 9.4$  Hz, H-5), 2.14 (s, 3H, CH<sub>3</sub>CO), 2.06 (s, 3H, CH<sub>3</sub>CO), 1.95 (s, 3H, CH<sub>3</sub>CO), 1.32 (d, 3H,  $J_{6,5} = 6.2$  Hz, H-6), 1.24 (d, 3H,  $J_{6'',5''} = 6.4$  Hz, H-6''), 1.21 (d, 3H,  $J_{6',5'} = 6.4$  Hz, H-6'); <sup>13</sup>C NMR (CDCl<sub>3</sub>, 175 MHz)  $\delta_{\text{C}}$  170.1 (C=O), 169.9 (C=O), 169.8 (C=O), 138.7 (Ar), 138.24 (Ar), 138.23 (Ar), 138.0 (Ar), 128.5 (2C, Ar), 128.39 (2C, Ar), 128.36 (2C, Ar), 128.25 (2C, Ar), 128.2 (2C, Ar), 127.81 (Ar), 127.76 (2C, Ar), 127.75 (2C, Ar), 127.72 (Ar), 127.70 (2C, Ar), 127.5 (Ar), 127.3 (Ar), 102.6 (C-1,  $J_{\text{C1,H1}} = 155.3$  Hz), 99.4 (C-1''),  $J_{\text{C1'',H1''}} = 174.9$  Hz), 99.2 (C-1',  $J_{\text{C1',H1'}} = 174.9$  Hz), 80.6 (C-3), 80.5 (C-4), 80.3 (C-4'), 78.4 (C-4''), 78.1 (C-2), 76.8 (C-3'), 75.5 (ArCH<sub>2</sub>), 75.2 (ArCH<sub>2</sub>), 74.41 (ArCH<sub>2</sub>), 74.39 (ArCH<sub>2</sub>), 72.1 (C-2''), 72.0 (C-5), 71.4 (C-3''), 70.4 (C-2''), 68.5 (C-5''), 68.4 (C-5'), 57.1 (OCH<sub>3</sub>), 21.0 (CH<sub>3</sub>CO), 20.9 (CH<sub>3</sub>CO), 20.8 (CH<sub>3</sub>CO), 17.93 (C-6), 17.91 (2C, C-6', C-6''); HRMS (ESI) calcd. for C<sub>53</sub>H<sub>64</sub>NaO<sub>16</sub> [M+Na]<sup>+</sup> 979.4087; found 979.4094.

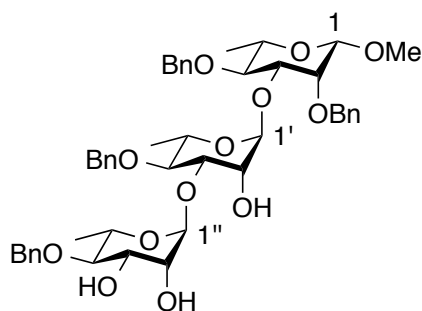

**Methyl**                      **4-*O*-benzyl- $\alpha$ -L-rhamnopyranosyl-(1 $\rightarrow$ 3)-4-*O*-benzyl- $\alpha$ -L-rhamnopyranosyl-(1 $\rightarrow$ 3)-2,4-di-*O*-benzyl- $\beta$ -L-rhamnopyranoside (58).** To a solution of **57** (58.1 mg, 0.0607 mmol) in CH<sub>3</sub>OH (2.0 mL) was added sodium methoxide (1 mg, 0.0243 mmol) and the reaction mixture was stirred for 1 day. The reaction mixture was then neutralized by the addition of Amberlite IR-120 H<sup>+</sup> resin. The mixture was then filtered and the filtrate was concentrated under reduced pressure. The resulting residue was purified by column chromatography (4:1, hexane–EtOAc) to give **58** (46.0 mg, 89%) as a colorless oil.  $[\alpha]^{25}_D +0.8$  (*c* 1.0, CHCl<sub>3</sub>); *R*<sub>f</sub> 0.33 (2:1, hexane–EtOAc); <sup>1</sup>H NMR (CDCl<sub>3</sub>, 700 MHz)  $\delta_H$  7.45–7.42 (m, 2H, ArH), 7.38–7.26 (m, 17H, ArH), 7.20–7.17 (m, 1H, ArH), 5.08 (d, 1H,  $J_{1',2'} = 1.4$  Hz, H-1'), 5.03 (d, 1H,  $J_{\text{gem}} = 12.1$  Hz, ArCH<sub>2</sub>), 5.02 (d, 1H,  $J_{1'',2''} = 1.8$  Hz, H-1''), 4.75 (d, 1H,  $J_{\text{gem}} = 11.0$  Hz, ArCH<sub>2</sub>), 4.72 (s, 2H, ArCH<sub>2</sub>), 4.70 (d, 1H,  $J_{\text{gem}} = 12.1$  Hz, ArCH<sub>2</sub>), 4.64 (d, 1H,  $J_{\text{gem}} = 11.0$  Hz, ArCH<sub>2</sub>), 4.63 (d, 1H,  $J_{\text{gem}} = 11.0$  Hz, ArCH<sub>2</sub>), 4.59 (d, 1H,  $J_{\text{gem}} = 11.0$  Hz, ArCH<sub>2</sub>), 4.35 (br s, 1H, H-1), 3.98–3.96 (m, 1H, H-2'), 3.94 (dd, 1H,  $J_{3',2'} = 3.5$  Hz,  $J_{3',4'} = 9.4$  Hz, H-3'), 3.88–3.84 (m, 1H, H-3''), 3.83–3.81 (m, 1H, H-2''), 3.79 (d, 1H,  $J_{2,3} = 2.6$  Hz, H-2), 3.78 (app dq, 1H,  $J_{5'',6''} = 6.4$  Hz,  $J_{5'',4''} = 9.3$  Hz, H-5''), 3.67 (dd, 1H,  $J_{3,2} = 2.6$  Hz,  $J_{3,4} = 9.6$  Hz, H-3), 3.66 (app dq, 1H,  $J_{5',6'} = 6.3$  Hz,  $J_{5',4'} = 9.5$  Hz, H-5'), 3.62 (app t, 1H,  $J_{4,3} = J_{4,5} = 9.6$  Hz, H-4), 3.52 (s, 3H, OCH<sub>3</sub>), 3.39 (app t, 1H,  $J_{4',3'} = J_{4',5'} = 9.5$  Hz, H-4'), 3.34 (app t,  $J_{4'',3''} = J_{4'',5''} = 9.3$  Hz, H-4''), 3.33 (app

dq, 1H,  $J_{5,6} = 6.2$  Hz,  $J_{5,4} = 9.4$  Hz, H-5), 2.29 (d, 1H,  $J_{\text{OH},3''} = 5.2$  Hz, 3''-OH), 2.11 (d, 1H,  $J_{\text{OH},2''} = 3.8$  Hz, 2''-OH), 2.06 (d, 1H,  $J_{\text{OH},2'} = 3.0$  Hz, 2'-OH), 1.37 (d, 3H,  $J_{6,5} = 6.2$  Hz, H-6), 1.27 (d, 3H,  $J_{6'',5''} = 6.4$  Hz, H-6''), 1.19 (d, 3H,  $J_{6',5'} = 6.3$  Hz, H-6');  $^{13}\text{C}$  NMR ( $\text{CDCl}_3$ , 175 MHz)  $\delta_{\text{C}}$  138.7 (Ar), 138.4 (Ar), 138.1 (Ar), 138.0 (Ar), 128.7 (2C, Ar), 128.6 (2C, Ar), 128.4 (2C, Ar), 128.2 (2C, Ar), 128.1 (Ar), 128.04 (2C, Ar), 127.96 (2C, Ar), 127.94 (Ar), 127.8 (2C, Ar), 127.7 (Ar), 127.6 (2C, Ar), 127.4 (Ar), 102.6 (C-1,  $J_{\text{C}1,\text{H}1} = 154.5$  Hz), 101.5 (C-1',  $J_{\text{C}1',\text{H}1'} = 172.5$  Hz), 101.1 (C-1'',  $J_{\text{C}1'',\text{H}1''} = 172.5$  Hz), 81.4 (C-4''), 80.8 (C-4), 80.6 (C-4'), 80.5 (C-3), 78.9 (C-3'), 78.3 (C-2), 75.5 (ArCH<sub>2</sub>), 75.20 (ArCH<sub>2</sub>), 75.18 (ArCH<sub>2</sub>), 74.4 (ArCH<sub>2</sub>), 72.0 (C-5), 71.4 (C-2''), 71.3 (C-3''), 71.2 (C-2'), 68.2 (C-5''), 68.1 (C-5'), 57.2 (OCH<sub>3</sub>), 18.1 (C-6), 17.94 (C-6''), 17.87 (C-6'); HRMS (ESI) calcd. for  $\text{C}_{47}\text{H}_{58}\text{NaO}_{13}$   $[\text{M}+\text{Na}]^+$  853.3770; found 853.3761.

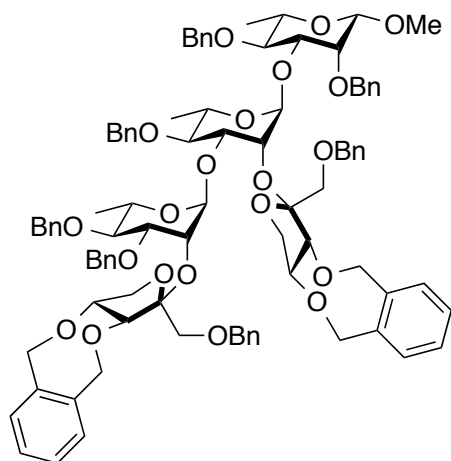

**Methyl 1-*O*-benzyl-3,4-*O*-xylylidene- $\beta$ -D-*threo*-pent-2-ulofuranosyl-(2 $\rightarrow$ 2)-3,4-di-*O*-benzyl- $\alpha$ -L-rhamnopyranosyl-(1 $\rightarrow$ 3)-[1-*O*-benzyl-3,4-*O*-xylylidene- $\beta$ -D-*threo*-pent-2-ulofuranosyl-(2 $\rightarrow$ 2)]-4-*O*-benzyl- $\alpha$ -L-rhamnopyranosyl-(1 $\rightarrow$ 3)-2,4-di-*O*-benzyl- $\beta$ -L-rhamnopyranoside (59 $\beta$ ).** A mixture of **7** (7.0 mg, 0.0155 mmol), **65** (16.1



mg, 0.0129 mmol) and 4 Å molecular sieves in CH<sub>2</sub>Cl<sub>2</sub> (0.43 mL) was stirred under an Ar atmosphere at room temperature for 30 min. The mixture was then cooled to –78 °C and then *N*-iodosuccinimide (4.2 mg, 0.0186 mmol) and silver triflate (0.8 mg, 3.1 μmol) were added. After stirring for 1 h at –78 °C, triethylamine was added. The reaction was warmed to room temperature and then a small amount of water was added, followed by solid Na<sub>2</sub>S<sub>2</sub>O<sub>3</sub>·5H<sub>2</sub>O until the solution was colorless. The solution was then dried over MgSO<sub>4</sub>, filtered and the filtrate was concentrated under reduced pressure. The resulting residue was purified by column chromatography (4:1, hexane–EtOAc) to give **59β** (11.7 mg, 58%) as a colorless oil.  $[\alpha]_D^{25} +22.0$  (*c* 1.1, CHCl<sub>3</sub>); *R<sub>f</sub>* 0.32 (2:1, hexane–EtOAc); <sup>1</sup>H NMR (CDCl<sub>3</sub>, 700 MHz) δ<sub>H</sub> 7.46–7.41 (m, 2H, ArH), 7.36–7.10 (m, 37H, ArH), 7.07–7.05 (m, 2H, ArH), 6.94–6.91 (m, 2H, ArH), 5.15 (br s, 1H), 5.09 (d, 1H, *J*<sub>gem</sub> 11.7 Hz, ArCH<sub>2</sub>), 5.01 (br s, 1H), 4.91 (d, 1H, *J*<sub>gem</sub> = 11.7 Hz, ArCH<sub>2</sub>), 4.87 (d, 1H, *J*<sub>gem</sub> = 11.7 Hz, ArCH<sub>2</sub>), 4.81–4.69 (m, 7H, ArCH<sub>2</sub>), 4.63–4.55 (m, 5H), 4.47–4.31 (m, 9H), 4.21–4.10 (m, 7H), 3.91–3.82 (m, 3H), 3.74–3.70 (m, 1H), 3.63–3.47 (m, 14H), 3.31–3.26 (m, 1H), 1.28 (d, 3H, *J* = 6.7 Hz), 1.13 (d, 3H, *J* = 6.7 Hz), 1.04 (d, 3H, *J* = 6.7 Hz); <sup>13</sup>C NMR (CDCl<sub>3</sub>, 175 MHz) δ<sub>C</sub> 139.2, 138.9, 138.6, 138.5, 138.4, 137.0, 136.9, 136.8, 131.62, 131.60, 131.3, 131.1, 129.3, 129.2, 128.7, 128.6, 128.5, 128.4, 128.3, 128.15, 128.07, 128.0, 127.9, 127.7, 127.68, 127.58, 127.5, 127.46, 127.43, 127.4, 127.3, 107.2, 107.1, 102.9, 101.8, 100.8, 82.1, 80.5, 80.1, 80.0, 79.1, 79.06, 75.6, 74.6, 74.5, 73.4, 73.3, 73.0, 72.8, 72.1, 70.4, 70.1, 69.5, 69.46, 69.43, 69.2, 68.9, 57.3, 18.7, 18.2, 18.1; HRMS (ESI) calcd. for C<sub>94</sub>H<sub>104</sub>NaO<sub>21</sub> [M+Na]<sup>+</sup> 1591.6962; found 1591.6966.

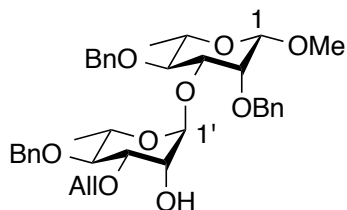

**Methyl 3-O-allyl-4-O-benzyl- $\alpha$ -L-rhamnopyranosyl-(1 $\rightarrow$ 3)-2,4-di-O-benzyl- $\beta$ -L-rhamnopyranoside (60).** To a solution of the **55** (158 mg, 0.266 mmol) in toluene (30.0 mL) was added di-*n*-butyltin oxide (99 mg, 0.399 mmol) and the mixture was heated at reflux for 3 h. The mixture was then cooled to room temperature before tetrabutylammonium bromide (128 mg, 0.399 mmol) and allyl bromide (38.5 mg, 34.5  $\mu$ L, 0.399 mmol) were added. After stirring for 2 h at reflux, the reaction mixture was concentrated and the resulting residue was purified by column chromatography (4:1, hexane–EtOAc) to give **60** (103 mg, 77%) as a colorless oil.  $[\alpha]^{25}_{\text{D}} +20.2$  ( $c$  1.0,  $\text{CHCl}_3$ );  $R_f$  0.36 (2:1, hexane–EtOAc);  $^1\text{H NMR}$  ( $\text{CDCl}_3$ , 500 MHz)  $\delta_{\text{H}}$  7.47–7.43 (m, 2H, ArH), 7.39–7.27 (m, 12H, ArH), 7.22–7.18 (m, 1H, ArH), 5.92 (ddt, 1H,  $J = 5.7, 10.5, 17.1$  Hz,  $\text{OCH}_2\text{CH}=\text{CH}_2$ ), 5.28 (dq, 1H,  $J = 1.7, 17.1$  Hz,  $\text{OCH}_2\text{CH}=\text{CH}_2$ ), 5.19–5.15 (m, 2H,  $\text{OCH}_2\text{CH}=\text{CH}_2$ , H-1'), 5.02 (d, 1H,  $J_{\text{gem}} = 12.4$  Hz, Ar $\text{CH}_2$ ), 4.86 (d, 1H,  $J_{\text{gem}} = 11.4$  Hz, Ar $\text{CH}_2$ ), 4.78 (d, 1H,  $J_{\text{gem}} = 10.9$  Hz, Ar $\text{CH}_2$ ), 4.74 (d, 1H,  $J_{\text{gem}} = 12.4$  Hz, Ar $\text{CH}_2$ ), 4.65 (d, 1H,  $J_{\text{gem}} = 10.9$  Hz, Ar $\text{CH}_2$ ), 4.61 (d, 1H,  $J_{\text{gem}} = 11.4$  Hz, Ar $\text{CH}_2$ ), 4.36 (br s, 1H, H-1), 4.14 (ddt, 1H  $J = 1.7, 5.7, 12.8$  Hz,  $\text{OCH}_2\text{CH}=\text{CH}_2$ ), 4.09 (ddt, 1H,  $J = 1.7, 5.7, 12.8$  Hz,  $\text{OCH}_2\text{CH}=\text{CH}_2$ ), 4.01–3.99 (m, 1H, H-2'), 3.82 (d, 1H,  $J_{2,3} = 2.7$  Hz, H-2), 3.74–3.67 (m, 3H, H-3, H-3', H-5'), 3.64 (app t, 1H,  $J_{4,3} = J_{4,5} = 9.6$  Hz, H-4), 3.53 (s, 3H,  $\text{OCH}_3$ ), 3.40 (app t, 1H,  $J_{4',3'} = J_{4',5'} = 9.1$  Hz, H-4'), 3.35 (app dq,  $J_{5,6} = 6.1$  Hz,  $J_{5,4} = 9.6$  Hz, H-5), 2.40 (d, 1H,  $J_{\text{OH}, 2'} = 1.5$  Hz, 2'-OH), 1.40 (d, 3H,  $J_{6,5} =$

6.1 Hz, H-6), 1.22 (d, 3H,  $J_{6',5'} = 6.4$  Hz, H-6');  $^{13}\text{C}$  NMR ( $\text{CDCl}_3$ , 125 MHz)  $\delta_{\text{C}}$  138.8 (Ar), 138.7 (Ar), 138.0 (Ar), 134.6 ( $\text{OCH}_2\text{CH}=\text{CH}_2$ ), 128.5 (2C, Ar), 128.3 (2C, Ar), 128.1 (2C, Ar), 128.0 (2C, Ar), 127.9 (Ar), 127.8 (2C, Ar), 127.7 (Ar), 127.5 (Ar), 127.3 (Ar), 117.3 ( $\text{OCH}_2\text{CH}=\text{CH}_2$ ), 102.6 (C-1,  $J_{\text{C1,H1}} = 154.0$  Hz), 101.1 (C-1',  $J_{\text{C1',H1'}} = 172.2$  Hz), 81.0 (C-4), 80.0 (C-3), 79.8 (C-3'), 79.4 (C-4'), 78.1 (C-5'), 75.5 (ArCH<sub>2</sub>), 75.0 (ArCH<sub>2</sub>), 74.4 (ArCH<sub>2</sub>), 72.0 (C-5), 71.0 ( $\text{OCH}_2\text{CH}=\text{CH}_2$ ), 69.1 (C-2'), 68.0 (C-2), 57.1 ( $\text{OCH}_3$ ), 17.9 (C-6), 17.84 (C-6'); HRMS (ESI) calcd. for  $\text{C}_{37}\text{H}_{46}\text{NaO}_9$   $[\text{M}+\text{Na}]^+$  657.3034; found 657.3034.

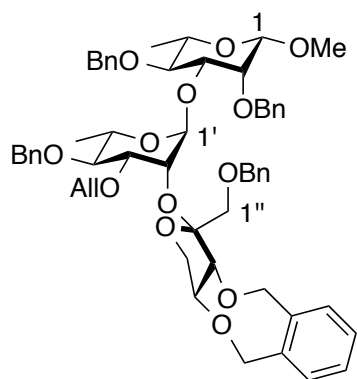

**Methyl 1-*O*-benzyl-3,4-*O*-xylylidene- $\beta$ -D-*threo*-pent-2-ulo-furanosyl-(2 $\rightarrow$ 2)-3-*O*-allyl-4-*O*-benzyl- $\alpha$ -L-rhamnopyranosyl-(1 $\rightarrow$ 3)-2,4-di-*O*-benzyl- $\beta$ -L-rhamnopyranoside (61 $\beta$ ).** A mixture of **7** (32.2 mg, 0.072 mmol), **60** (38.0 mg, 0.060 mmol), and 4Å molecular sieves in  $\text{CH}_2\text{Cl}_2$  (2.0 mL) was stirred under an Ar atmosphere at room temperature for 30 min. The mixture was then cooled to  $-78$  °C and *N*-iodosuccinimide (19.4 mg, 0.0864 mmol) and silver triflate (1.9 mg, 7.2  $\mu\text{mol}$ ) were added. After stirring for 1 h at  $-78$  °C, triethylamine was added. The reaction was warmed to room temperature and then a small amount of water was added, followed by solid  $\text{Na}_2\text{S}_2\text{O}_3 \cdot 5\text{H}_2\text{O}$  until the solution was colorless. The solution was then dried over

MgSO<sub>4</sub>, filtered and the filtrate was concentrated under reduced pressure. The resulting residue was purified by column chromatography (4:1, hexane–EtOAc) to give **61a** (15.3 mg, 26%) and **61b** (30.6 mg, 52%) both as colorless oils. Data for **61b**:  $[\alpha]_D^{25} +14.1$  (*c* 0.4, CHCl<sub>3</sub>); *R<sub>f</sub>* 0.30 (2:1, hexane–EtOAc); <sup>1</sup>H NMR (CDCl<sub>3</sub>, 700 MHz)  $\delta_H$  7.44–7.41 (m, 2H, ArH), 7.38–7.23 (m, 19H, ArH), 7.20–7.16 (m, 3H, ArH), 5.77–5.73 (m, 1H, OCH<sub>2</sub>CH=CH<sub>2</sub>), 5.17 (dq, 1H, *J* = 17.3, 1.7 Hz, OCH<sub>2</sub>CH=CH<sub>2</sub>), 5.06–5.00 (m, 3H, OCH<sub>2</sub>CH=CH<sub>2</sub>, 2 x ArCH<sub>2</sub>), 4.96 (br s, 1H, H-1'), 4.88–4.81 (m, 3H, ArCH<sub>2</sub>), 4.79 (d, 1H, *J*<sub>gem</sub> = 12.9 Hz, ArCH<sub>2</sub>), 4.76 (d, 1H, *J*<sub>gem</sub> = 12.9 Hz, ArCH<sub>2</sub>), 4.66 (d, 1H, *J*<sub>gem</sub> = 12.0 Hz, ArCH<sub>2</sub>), 4.57 (d, 1H, *J*<sub>gem</sub> = 11.5 Hz, ArCH<sub>2</sub>), 4.53 (d, 1H, *J*<sub>gem</sub> = 11.5 Hz, ArCH<sub>2</sub>), 4.51 (d, 1H, *J*<sub>gem</sub> = 12.5 Hz, ArCH<sub>2</sub>), 4.41–4.37 (m, 2H, ArCH<sub>2</sub>, H-4''), 4.31 (s, 1H, H-1), 4.25 (d, 1H, *J*<sub>3'',4''</sub> = 6.4 Hz, H-3''), 4.11 (app t, 1H, *J*<sub>2',1'</sub> = *J*<sub>2',3'</sub> = 2.4 Hz, H-2'), 4.01–3.92 (m, 3H, H-5''a, 2 x OCH<sub>2</sub>CH=CH<sub>2</sub>), 3.79 (d, 1H, *J*<sub>2,3</sub> = 2.8 Hz, H-2), 3.69 (dq, 1H, *J*<sub>5',4'</sub> = 9.3 Hz, *J*<sub>5',6'</sub> = 6.4 Hz, H-5'), 3.66 (dd, 1H, *J*<sub>3',2'</sub> = 2.4 Hz, *J*<sub>3',4'</sub> = 9.3 Hz, H-3'), 3.63 (dd, 1H, *J*<sub>3,2</sub> = 2.8 Hz, *J*<sub>3,4</sub> = 9.7 Hz, H-3), 3.58–3.50 (m, 4H, H-4, H-1''a, H-1''b, H-5''b), 3.49 (s, 3H, OCH<sub>3</sub>), 3.45 (app t, *J*<sub>4',3'</sub> = *J*<sub>4',5'</sub> = 9.3 Hz, H-4'), 3.30 (app dq, *J*<sub>5,6</sub> = 6.2 Hz, *J*<sub>5,4</sub> = 9.1 Hz, H-5), 1.27 (d, 3H, *J*<sub>6,5</sub> = 6.2 Hz, H-6), 1.18 (d, 3H, *J*<sub>6',5'</sub> = 6.4 Hz, H-6'); <sup>13</sup>C NMR (CDCl<sub>3</sub>, 175 MHz)  $\delta_C$  139.1 (Ar), 138.8 (Ar), 138.30 (Ar), 138.26 (Ar), 136.7 (Ar), 136.1 (Ar), 134.9 (OCH<sub>2</sub>CH=CH<sub>2</sub>), 131.5 (Ar), 131.0 (Ar), 129.2 (Ar), 129.1 (Ar), 128.4 (2C, Ar), 128.3 (2C, Ar), 128.2 (2C, Ar), 128.1 (2C, Ar), 127.8 (2C, Ar), 127.72 (2C, Ar), 127.71 (Ar), 127.6 (2C, Ar), 127.54 (2C, Ar), 127.50 (Ar), 127.3 (Ar), 127.2 (Ar), 116.7 (OCH<sub>2</sub>CH=CH<sub>2</sub>), 107.1 (C-2''), 102.6 (C-1, *J*<sub>C1,H1</sub> = 154.6 Hz), 101.6 (C-1', *J*<sub>C1,H1</sub> = 173.6 Hz), 82.0 (C-3''), 80.9 (C-3), 80.5 (C-4), 80.1 (C-4'), 79.7 (C-4''), 78.5 (C-2), 78.2 (C-3'), 75.3 (ArCH<sub>2</sub>), 74.6

(ArCH<sub>2</sub>), 74.5 (ArCH<sub>2</sub>), 73.3 (ArCH<sub>2</sub>), 72.0 (C-5), 71.7 (OCH<sub>2</sub>CH=CH<sub>2</sub>), 70.4 (C-5''), 69.9 (C-2'), 69.5 (ArCH<sub>2</sub>), 69.3 (ArCH<sub>2</sub>), 68.9 (C-5'), 68.5 (C-1''), 57.1 (OCH<sub>3</sub>), 18.1 (C-6), 17.9 (C-6'); HRMS (ESI) calcd. for C<sub>57</sub>H<sub>66</sub>NaO<sub>13</sub> [M+Na]<sup>+</sup> 981.4396; found 981.4385.

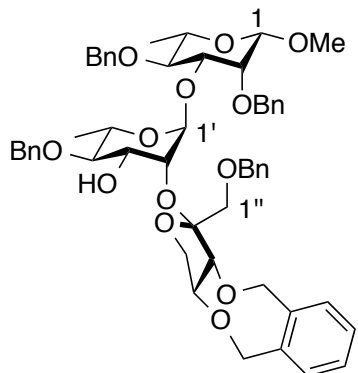

**Methyl 1-*O*-benzyl-3,4-*O*-xylylidene-β-*D*-*threo*-pent-2-ulofuranosyl-(2→2)-4-*O*-benzyl-α-*L*-rhamnopyranosyl-(1→3)-2,4-di-*O*-benzyl-β-*L*-rhamnopyranoside (62).**

To a solution of **61β** (30.6 mg, 0.0319 mmol) in THF (1.0 mL), degassed under vacuum, and stirred under an Ar atmosphere, (1,5-cyclooctadiene) bis-(methylphenylphosphine)iridium I hexafluorophosphate catalyst (1.3 mg, 1.6 μmol) was added, followed by further degassing of the mixture. The suspension was stirred for 30 min at 0 °C, and the catalyst was then activated with hydrogen. At this point, the solution became nearly colorless. The excess of hydrogen gas was removed by exchange of Ar gas. The reaction mixture was then stirred for 24 h at room temperature under an Ar atmosphere. The solvent was then evaporated, and the residue was dissolved in acetone–water (9:1, 2.0 mL). To the solution was then added HgO (10.4 mg, 0.0479 mmol) and HgCl<sub>2</sub> (13.0 mg, 0.0479 mmol). After stirring for 24 h at room temperature, the solvent was evaporated and the residue was dissolved in EtOAc and

washed with 10% KI solution, satd aq Na<sub>2</sub>S<sub>2</sub>O<sub>3</sub>, and then water. The organic layer was then dried over MgSO<sub>4</sub>, filtered and the filtrate was concentrated under reduced pressure. The resulting residue was purified by column chromatography (4:1, hexane–EtOAc) to give **62** (23.5 mg, 80%) as a colorless oil.  $[\alpha]_D^{25} +15.5$  (*c* 1.5, CHCl<sub>3</sub>); *R<sub>f</sub>* 0.30 (2:1, hexane–EtOAc); <sup>1</sup>H NMR (CDCl<sub>3</sub>, 500 MHz)  $\delta_H$  7.45–7.39 (m, 4H, ArH), 7.35–7.24 (m, 17H, ArH), 7.21–7.17 (m, 3H, ArH), 5.10 (d, 1H,  $J_{1',2'} = 1.2$  Hz, H-1'), 5.04 (d, 1H,  $J_{gem} = 11.7$  Hz, ArCH<sub>2</sub>), 4.96 (d, 1H,  $J_{gem} = 13.2$  Hz, ArCH<sub>2</sub>), 4.93 (d, 1H,  $J_{gem} = 11.7$  Hz, ArCH<sub>2</sub>), 4.83 (d, 1H,  $J_{gem} = 11.4$  Hz, ArCH<sub>2</sub>), 4.78 (d, 1H,  $J_{gem} = 12.3$  Hz, ArCH<sub>2</sub>), 4.75 (d, 1H,  $J_{gem} = 12.3$  Hz, ArCH<sub>2</sub>), 4.69 (d, 1H,  $J_{gem} = 11.4$  Hz, ArCH<sub>2</sub>), 4.68 (d, 1H,  $J_{gem} = 13.2$  Hz, ArCH<sub>2</sub>), 4.61 (d, 1H,  $J_{gem} = 11.4$  Hz, ArCH<sub>2</sub>), 4.55 (d, 1H,  $J_{gem} = 11.4$  Hz, ArCH<sub>2</sub>), 4.47 (d, 1H,  $J_{gem} = 12.4$  Hz, ArCH<sub>2</sub>), 4.40 (d, 1H,  $J_{gem} = 12.4$  Hz, ArCH<sub>2</sub>), 4.32 (s, 1H, H-1), 4.28 (app dt,  $J_{4'',3''} = J_{4'',5''b} = 5.3$  Hz,  $J_{4'',5''a} = 8.0$  Hz, H-4''), 4.10 (dd, 1H,  $J_{5'',4''} = 8.0$  Hz,  $J_{gem} = 9.6$  Hz, H-5''), 4.04 (dd, 1H,  $J_{2',1'} = 1.2$  Hz,  $J_{2',3'} = 3.3$  Hz, H-2'), 4.00–3.97 (m, 1H, H-3'), 3.97 (d, 1H,  $J_{3'',4''} = 5.3$  Hz, H-3''), 3.85 (d, 1H,  $J_{2,3} = 2.6$  Hz, H-2), 3.75 (dq, 1H,  $J_{5',4'} = 9.4$  Hz,  $J_{5',6'} = 6.1$  Hz, H-5'), 3.63 (dd, 1H,  $J_{3,2} = 2.6$  Hz,  $J_{3,4} = 9.5$  Hz, H-3), 3.58 (dd, 1H,  $J_{4,3} = 9.5$  Hz,  $J_{4,5} = 8.8$  Hz, H-4), 3.57 (d, 1H,  $J_{gem} = 10.9$  Hz, H-1''a), 3.51 (s, 3H, OCH<sub>3</sub>), 3.53–3.47 (m, 1H, H-5''), 3.34 (d, 1H,  $J_{gem} = 10.9$  Hz, H-1''b), 3.31 (app dq,  $J_{5,6} = 6.4$  Hz,  $J_{5,4} = 8.8$  Hz, H-5), 3.25 (app t, 1H,  $J_{4',3'} = J_{4',5'} = 9.3$  Hz, H-4'), 1.32 (d, 3H,  $J_{6,5} = 6.4$  Hz, H-6), 1.17 (d, 3H,  $J_{6',5'} = 6.1$  Hz, H-6'); <sup>13</sup>C NMR (CDCl<sub>3</sub>, 125 MHz)  $\delta_C$  139.2 (Ar), 138.8 (Ar), 138.5 (Ar), 137.6 (Ar), 136.8 (Ar), 135.9 (Ar), 131.6 (Ar), 131.3 (Ar), 129.5 (Ar), 128.41 (2C, Ar), 128.39 (2C, Ar), 128.15 (2C, Ar), 128.11 (2C, Ar), 127.8 (2C, Ar), 127.7 (2C, Ar), 127.62 (2C, Ar), 127.61 (2C, Ar), 127.57 (2C, Ar), 127.3 (Ar), 127.2 (Ar), 106.5 (C-

2''), 102.6 (C-1,  $J_{C1,H1} = 152.9$  Hz), 101.4 (C-1',  $J_{C1',H1'} = 173.9$  Hz), 84.3 (C-3''), 81.8 (C-4'), 81.7 (C-4), 80.9 (C-4''), 80.3 (C-3), 78.3 (C-2), 75.2 (ArCH<sub>2</sub>), 74.4 (ArCH<sub>2</sub>), 74.2 (ArCH<sub>2</sub>), 73.33 (C-2'), 73.26 (ArCH<sub>2</sub>), 72.1 (C-5), 71.0 (C-3'), 70.4 (C-5''), 69.7 (C-1''), 69.5 (ArCH<sub>2</sub>), 69.0 (ArCH<sub>2</sub>), 67.8 (C-5'), 57.1 (OCH<sub>3</sub>), 18.1 (C-6), 17.9 (C-6'); HRMS (ESI) calcd. for C<sub>54</sub>H<sub>62</sub>NaO<sub>13</sub> [M+Na]<sup>+</sup> 941.4083; found 941.4080.

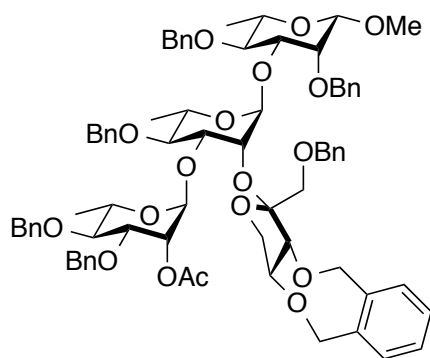

**Methyl 2-*O*-acetyl-3,4-di-*O*-benzyl- $\alpha$ -L-rhamnopyranosyl-(1 $\rightarrow$ 3)-[1-*O*-benzyl-3,4-*O*-xylylidene- $\beta$ -D-*threo*-pent-2-ulofuranosyl-(2 $\rightarrow$ 2)]-4-*O*-benzyl- $\alpha$ -L-rhamnopyranosyl-(1 $\rightarrow$ 3)-2,4-di-*O*-benzyl- $\beta$ -L-rhamnopyranoside (64).** A mixture of **63**<sup>6</sup> (8.8 mg, 0.0179 mmol), **62** (13.7 mg, 0.0149 mmol), and 4Å molecular sieves in CH<sub>2</sub>Cl<sub>2</sub> (1.0 mL) was stirred under an Ar atmosphere at room temperature for 30 min. The mixture was then cooled to 0 °C and *N*-iodosuccinimide (4.8 mg, 0.0215 mmol) and silver triflate (0.9 mg, 3.6  $\mu$ mol) were added. After stirring for 2 h at 0 °C, triethylamine was added. The reaction was warmed to room temperature and then a small amount of water was added, followed by solid Na<sub>2</sub>S<sub>2</sub>O<sub>3</sub>·5H<sub>2</sub>O until the solution was colorless. The solution was then dried over MgSO<sub>4</sub>, filtered and the filtrate concentrated under reduced pressure. The resulting residue was purified by column chromatography (4:1, hexane–EtOAc) to give **64** (17.5 mg, 91%) as a colorless oil.  $[\alpha]_D^{25} +25.0$  ( $c$  1.3, CHCl<sub>3</sub>);  $R_f$  0.36 (2:1, hexane–EtOAc); <sup>1</sup>H NMR (CDCl<sub>3</sub>, 700 MHz)

$\delta_{\text{H}}$  7.47–7.44 (m, 3H, ArH), 7.38–7.15 (m, 29H, ArH), 6.98–6.94 (m, 2H, ArH), 5.51 (br s, 1H), 5.15–5.07 (m, 3H), 4.96 (d, 1H,  $J_{\text{gem}} = 13.0$  Hz, ArCH<sub>2</sub>), 4.97 (d, 1H,  $J_{\text{gem}} = 11.1$  Hz, ArCH<sub>2</sub>), 4.87 (d, 1H,  $J_{\text{gem}} = 11.1$  Hz, ArCH<sub>2</sub>), 4.84 (d, 1H,  $J_{\text{gem}} = 11.1$  Hz, ArCH<sub>2</sub>), 4.77–4.72 (m, 3H, ArCH<sub>2</sub>), 4.66–4.54 (m, 5H, ArCH<sub>2</sub>), 4.41–4.32 (m, 4H), 4.20–4.11 (m, 5H), 4.02–3.94 (m, 2H), 3.86–3.84 (m, 1H), 3.75–3.71 (m 1H), 3.64–3.55 (m, 5H) 3.53–3.50 (m, 4H, OCH<sub>3</sub>), 3.40 (app t, 1H,  $J = 9.2$  Hz), 3.33–3.28 (m, 1H), 2.06 (s, 3H, CH<sub>3</sub>CO), 1.28 (d, 3H,  $J_{6,5} = 6.1$  Hz), 1.18 (d, 3H,  $J = 6.1$  Hz), 1.12 (d, 3H,  $J = 6.1$  Hz); <sup>13</sup>C NMR (CDCl<sub>3</sub>, 175 MHz)  $\delta_{\text{C}}$  170.3 (C=O), 139.0 (Ar), 138.9 (Ar), 138.49 (Ar), 138.44 (Ar), 138.34 (Ar), 138.25 (Ar), 136.9 (Ar), 136.8 (Ar), 131.6 (Ar), 131.3 (Ar), 129.4 (Ar), 129.2 (Ar), 128.6 (Ar), 128.5 (Ar), 128.4 (Ar), 128.36 (Ar), 128.3 (Ar), 128.2 (Ar), 128.0 (Ar), 127.9 (Ar), 127.84 (Ar), 127.79 (Ar), 127.7 (Ar), 127.6 (Ar), 127.6 (Ar), 127.4 (Ar), 127.33 (Ar), 107.1, 102.8, 101.6, 99.3, 82.8, 82.2, 80.6, 80.5, 80.1, 80.0, 78.8, 78.4, 75.7, 75.6, 75.5, 74.7, 74.4, 73.4, 72.5, 72.2, 71.9, 70.4, 69.4, 69.3, 69.2, 69.1, 68.8, 68.5, 57.3, 21.2 (CH<sub>3</sub>CO), 18.5, 18.2, 18.1; HRMS (ESI) calcd. for C<sub>76</sub>H<sub>86</sub>NaO<sub>18</sub> [M+Na]<sup>+</sup> 1309.5706; found 1309.5706.

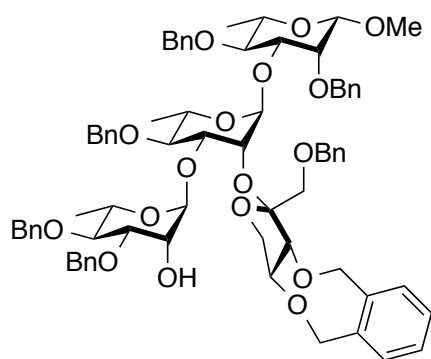

**Methyl 2-*O*-benzyl-3,4-*O*-xylylidene- $\alpha$ -D-*threo*-pent-2-ulofuranosyl-(2 $\rightarrow$ 2)-3,4-di-*O*-benzyl- $\alpha$ -L-rhamnopyranosyl-(1 $\rightarrow$ 3)-4-*O*-benzyl- $\alpha$ -L-rhamnopyranosyl-(1 $\rightarrow$ 3)-2,4-di-*O*-benzyl- $\beta$ -L-rhamnopyranoside (65).** To a solution of the **64** (17.5



mg, 0.013 mmol) in CH<sub>3</sub>OH (1.0 mL) was added sodium methoxide (0.06 mg, 1.3 μmol) and the reaction mixture was stirred at room temperature. After stirring for 24 h, the reaction mixture was neutralized by the addition of Amberlite IR-120 H<sup>+</sup> resin. The solution was filtered and the filtrate was concentrated under reduced pressure. The resulting residue was purified by column chromatography (2:1, hexane–EtOAc) to give **65** (15.2 mg, 93%) as a colorless oil.  $[\alpha]_D^{25} +11.4$  (*c* 1.0, CHCl<sub>3</sub>); *R<sub>f</sub>* 0.41 (1:1, hexane–EtOAc); <sup>1</sup>H NMR (CDCl<sub>3</sub>, 500 MHz) δ<sub>H</sub> 7.45–7.41 (m, 2H, ArH), 7.37–7.22 (m, 28H, ArH), 7.20–7.16 (m, 1H, ArH), 7.15–7.10 (m, 1H, ArH), 7.09–7.07 (m, 2H, ArH), 5.09 (d, 1H, *J* = 1.3 Hz), 5.06–4.98 (m, 3H), 4.88 (d, 1H, *J*<sub>gem</sub> = 11.0 Hz, ArCH<sub>2</sub>), 4.83–4.67 (m, 6H, ArCH<sub>2</sub>), 4.65–4.58 (m, 3H, ArCH<sub>2</sub>), 4.55 (d, 1H, *J*<sub>gem</sub> = 11.0 Hz, ArCH<sub>2</sub>), 4.46 (d, 1H, *J*<sub>gem</sub> = 11.0 Hz, ArCH<sub>2</sub>), 4.42–4.36 (m, 2H), 4.35 (s, 1H), 4.26–4.19 (m, 2H), 4.13–4.10 (m, 1H), 4.04–3.96 (m, 3H), 3.80 (d, 1H, *J* = 2.7 Hz), 3.76 (dd, 1H, *J* = 2.7, 9.2 Hz), 3.72–3.65 (m, 3H), 3.62 (app t, 1H, *J* = 9.2 Hz), 3.58–3.50 (m, 6H), 3.46 (d, 1H, *J* = 11.2 Hz), 3.38–3.29 (m, 2H), 1.37 (d, 3H, *J* = 6.2 Hz), 1.18 (d, 3H, *J* = 6.2 Hz), 1.15 (d, 3H, *J* = 6.2 Hz); <sup>13</sup>C NMR (CDCl<sub>3</sub>, 125 MHz) δ<sub>C</sub> 138.9 (Ar), 138.64 (Ar), 138.55 (Ar), 138.53 (Ar), 138.4 (Ar), 138.1 (Ar), 136.9 (Ar), 136.7 (Ar), 131.7 (Ar), 131.2 (Ar), 129.4 (Ar), 129.3 (Ar), 129.3 (Ar), 128.7 (Ar), 128.6 (Ar), 128.5 (Ar), 128.43 (Ar), 128.37 (Ar), 128.26 (Ar), 128.15 (Ar), 128.09 (Ar), 127.88 (Ar), 127.85 (Ar), 127.77 (Ar), 127.73 (Ar), 127.61 (Ar), 127.58 (Ar), 127.54 (Ar), 107.3, 102.8, 101.7, 101.6, 82.1, 81.0, 80.9, 80.3, 80.02, 80.00, 78.6, 78.4, 75.8, 75.3, 75.1, 74.5, 73.3, 73.3, 72.8, 72.2, 71.6, 70.5, 70.1, 69.52, 69.50, 69.41, 68.9, 68.3, 57.3, 18.4, 18.1, 18.0; HRMS (ESI) calcd. for C<sub>74</sub>H<sub>84</sub>NaO<sub>17</sub> [M+Na]<sup>+</sup> 1267.5601 found 1267.5608.

## References

1. C. S. Callam, R. R. Gadikota, T. L. Lowary, *J. Org. Chem.* 2001, **69**, 4549–4558.
2. M. Petermichl, S. Loscher, R. Schobert, *Angew. Chem. Int. Ed.* 2016, **55**, 10122–10125.
3. V. Pozsgay, J.-R. Brisson, H. J. Jennings, *Can. J. Chem.* 1987, **65**, 2764–2769.
4. A. Banaszek, V. Zaitsev, *Tetrahedron Asym.* 2004, **15**, 299–306.
5. H. R. H. Elsaidi, T. L. Lowary, *Chem. Sci.* 2015, **6**, 3161–3172.
6. V. K. Rajput, B. Mukhopadhyay, *J. Org. Chem.* 2008, **73**, 6924–6927.

Recorded on: **u500, Jan 25 2018**    Sweep Width(Hz): **6009.62**    Acquisition Time(s): **5**    Relaxation Delay(s): **0.1**  
 Pulse Sequence: **PRESAT**    Digital Res.(Hz/pt): **0.09**    Hz per mm(Hz/mm): **25.04**    Completed Scans: **8**

Bo-Shun, Ball-XYL-042-Bn  
 499.797 MHz H1 1D in cdcl3 (ref. to CDCl3 @ 7.26 ppm)  
 temp 27.7 C -> actual temp = 27.0 C, coldlual probe

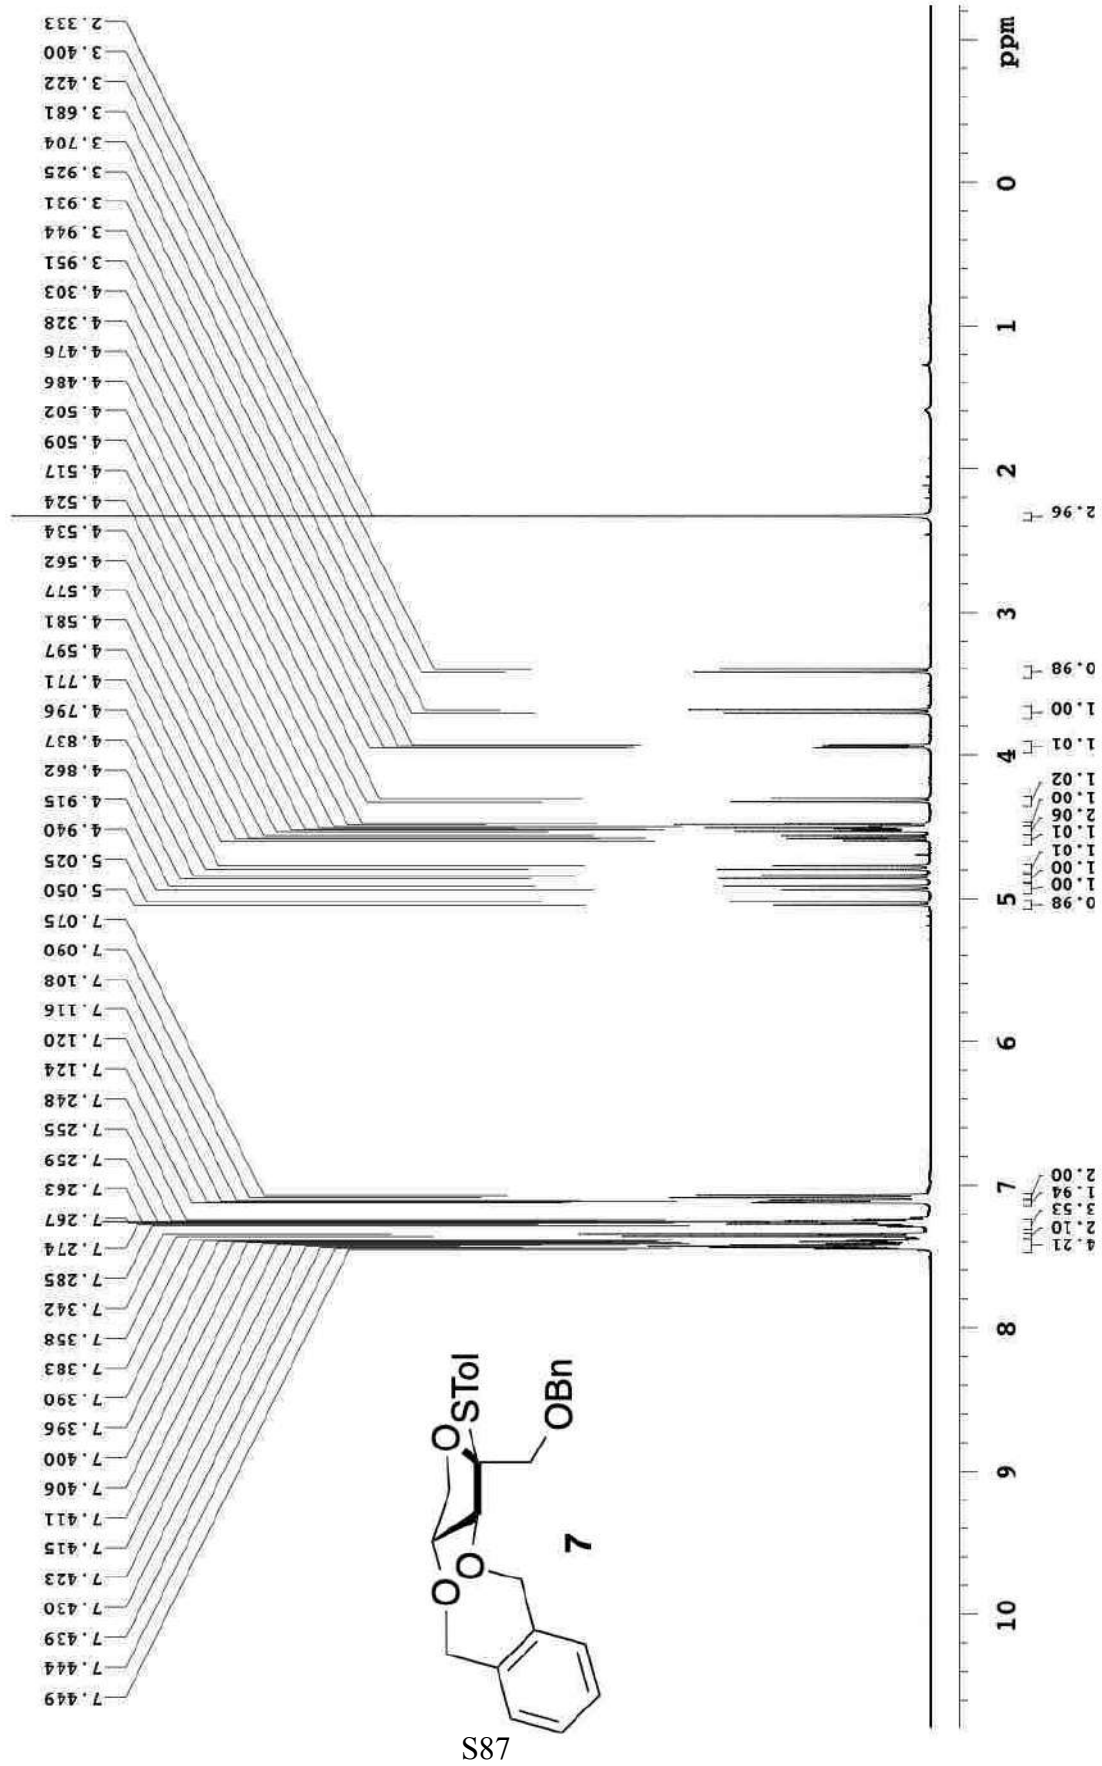

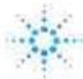

Agilent Technologies

Department of Chemistry, University of Alberta

Recorded on: **u500, Jan 25 2018**      Sweep Width(Hz): **33783.8**      Acquisition Time(s): **1**      Relaxation Delay(s): **1**  
Pulse Sequence: **s2pul**      Digital Res.(Hz/pt): **0.26**      Hz per mm(Hz/mm): **109.99**      Completed Scans: **32**

Bo-Shun, Bai-XYL-042-Bn  
125.688 MHz C13(H1) 1D in cdcl3 (ref. to CDC13 @ 77.06 ppm)  
temp 27.7 C -> actual temp = 27.0 C, coldlual probe

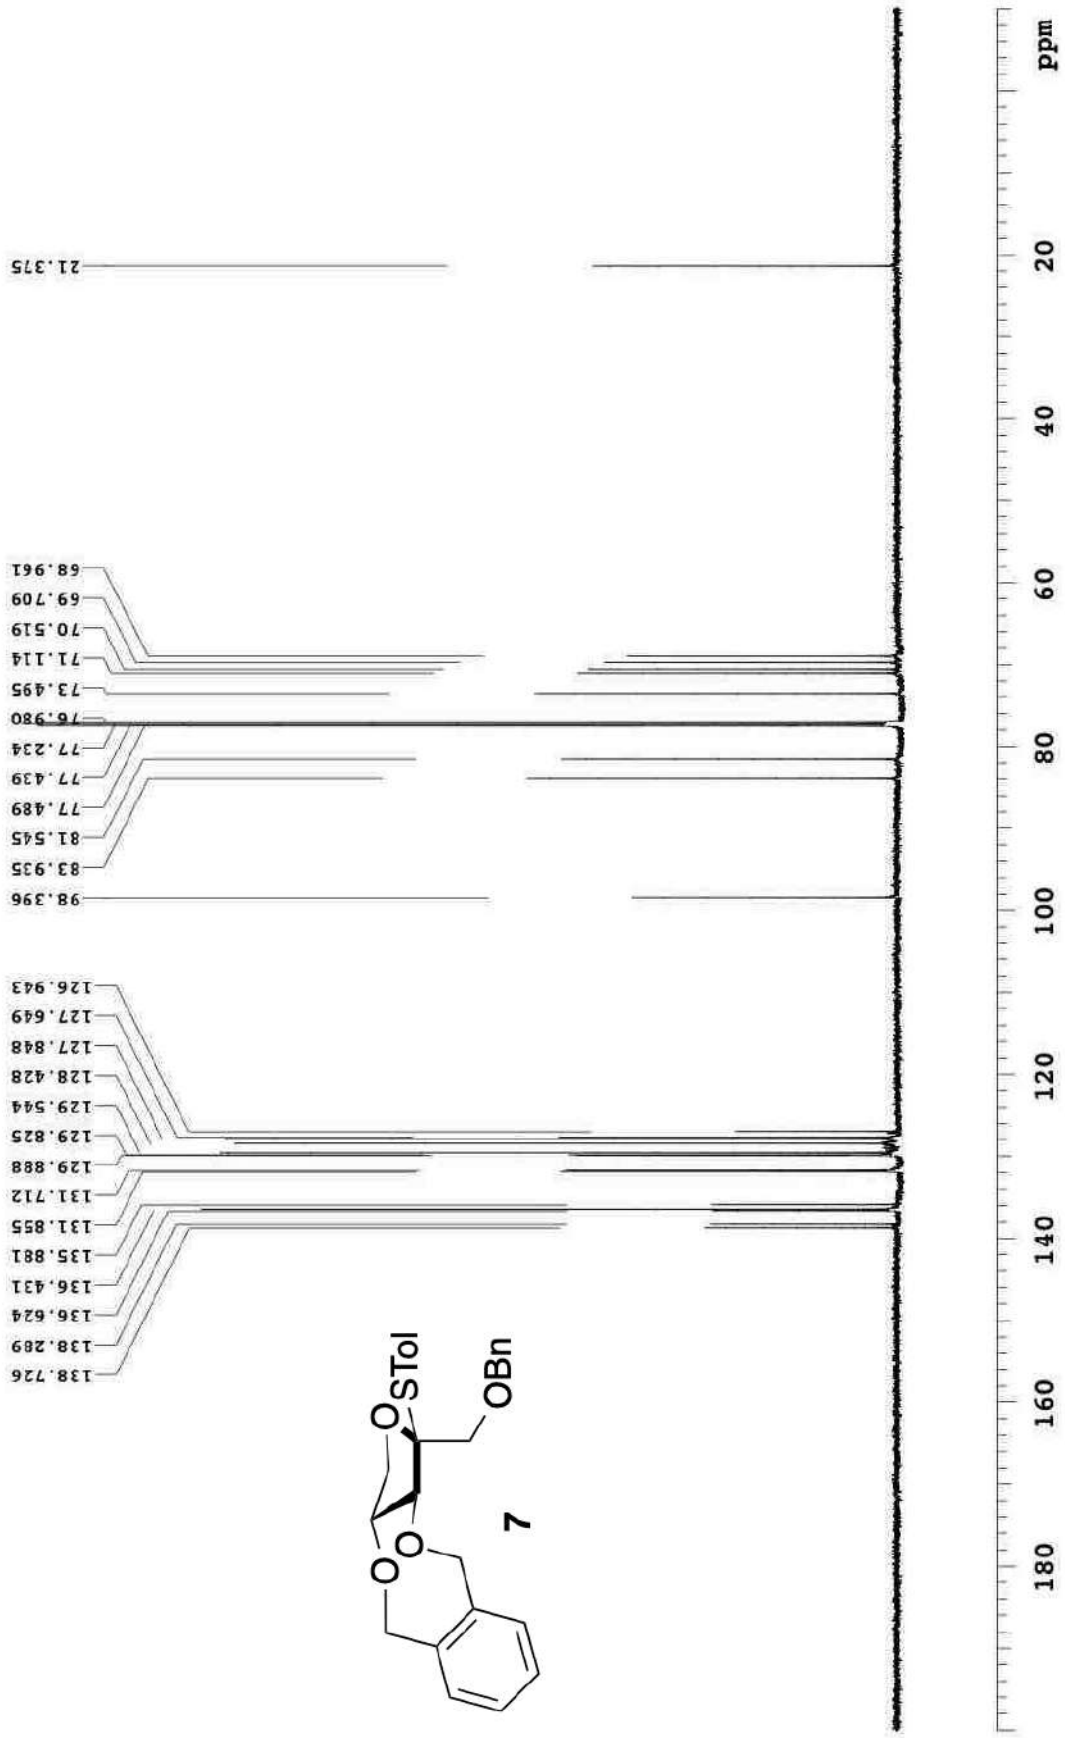

S88

Recorded on: **u500, Jun 24 2016** Sweep Width(Hz): **6009.62** Acquisition Time(s): **5** Relaxation Delay(s): **0.1**  
 Pulse Sequence: **PRESAT** Digital Freq.(Hz/pt): **0.09** Hz per mm(Hz/mm): **25.04** Completed Scans: **16**

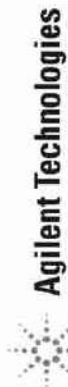

Bo-Shun, Ball-XYL-042  
 499.806 MHz H1 PRESAT in cdcl3 (ref. to CDC13 @ 7.26 ppm), temp 27.7 C -> actual temp = 27.0 C, coldluid probe

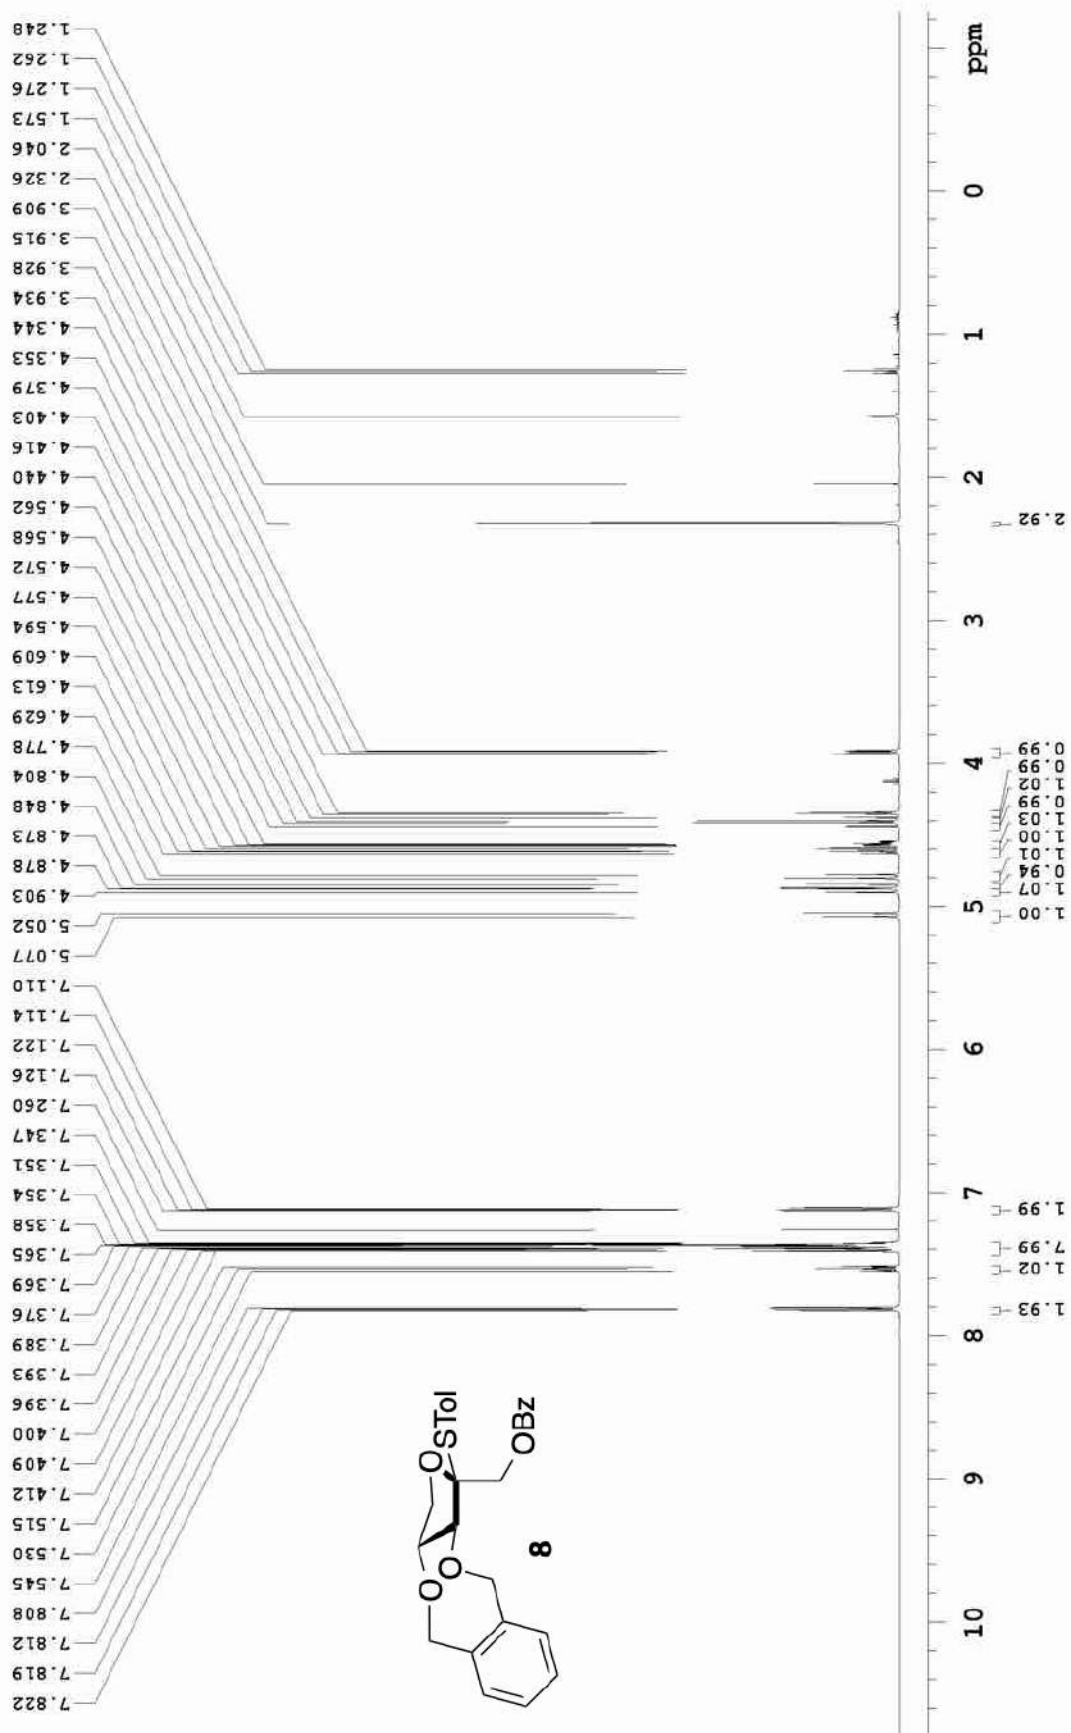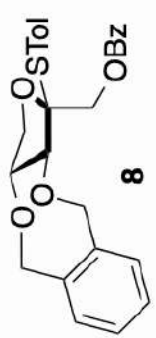

Recorded on: **u500\_Jun 24 2016** Sweep Width(Hz): **32894.7** Acquisition Time(s): **1** Relaxation Delay(s): **1**  
 Pulse Sequence: **sgpul** Digital Res.(Hz/ppm): **0.25** Hz per mm(Hz/mm): **108.63** Completed Scans: **128**

Bo-Shun, Bail-XYL-042  
 125.691 MHz C13[H1] 1D in cdc13 (ref. to CDC13 @ 77.06 ppm), temp 27.7 C -> actual temp = 27.0 C, coldddual probe

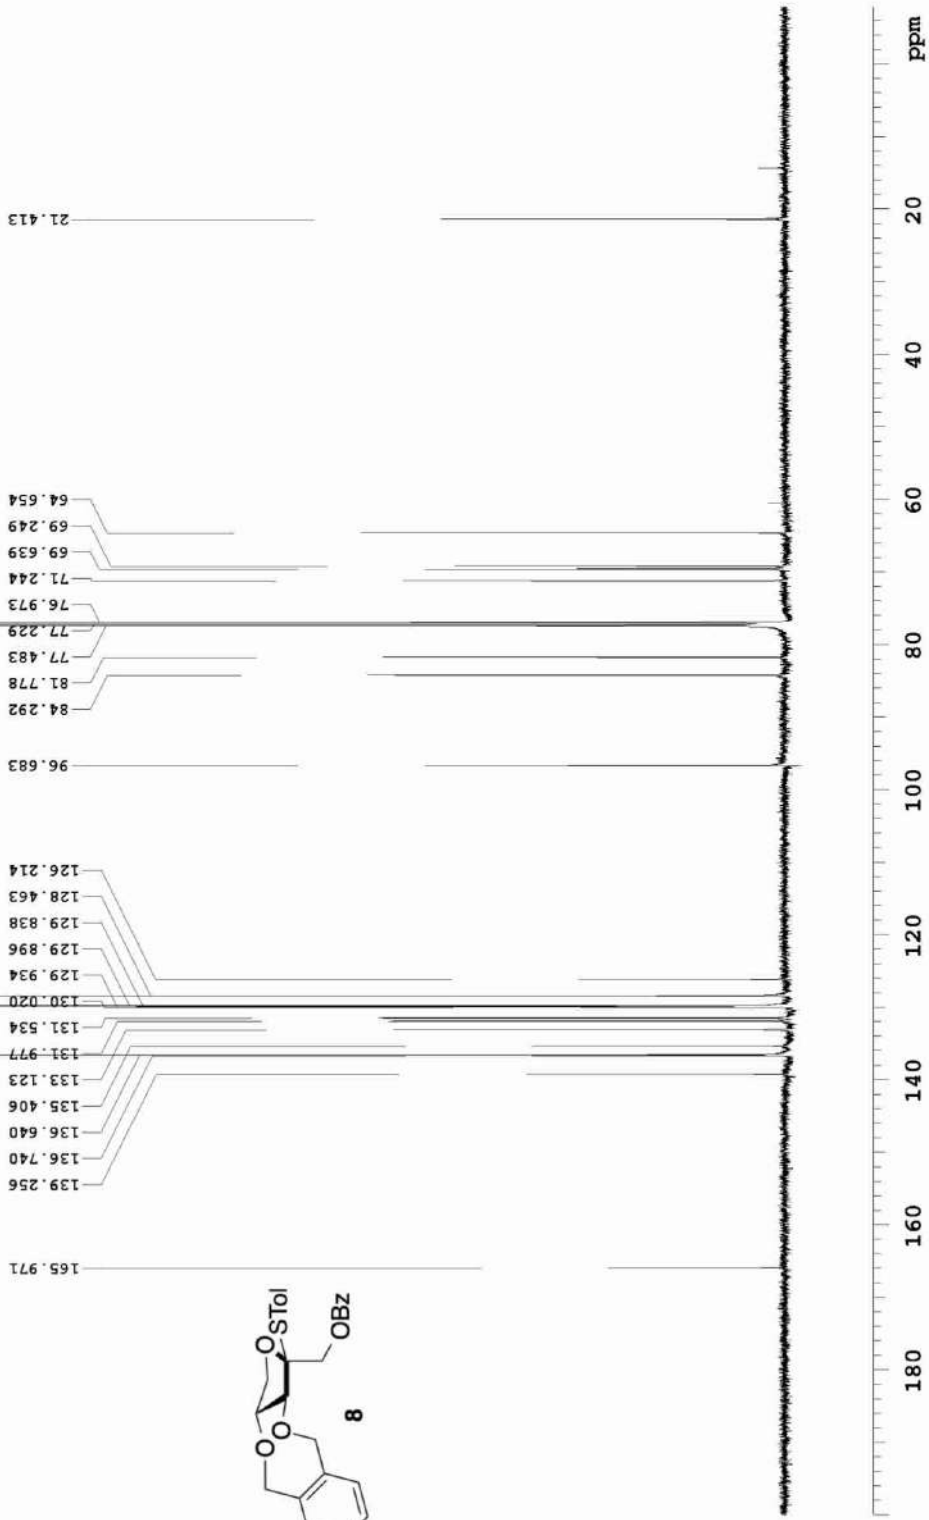

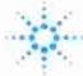

Department of Chemistry, University of Alberta

Relaxation Delay(s): 0.1  
Completed Scans: 8

Acquisition Time(s): 5  
Hz per mm(Hz/mm): 32.09

Sweep Width(Hz): 8389.26  
Digital Res.(Hz/pt): 0.13

Recorded on: v700, Feb 10 2018  
Pulse Sequence: PRESAT

Bo-Shun, Ball-XYL-075  
699.762 MHz H1 1D in cdcl3 (ref. to CDC13 @ 7.26 ppm)  
temp 27.5 C -> actual temp = 27.0 C, coldid probe

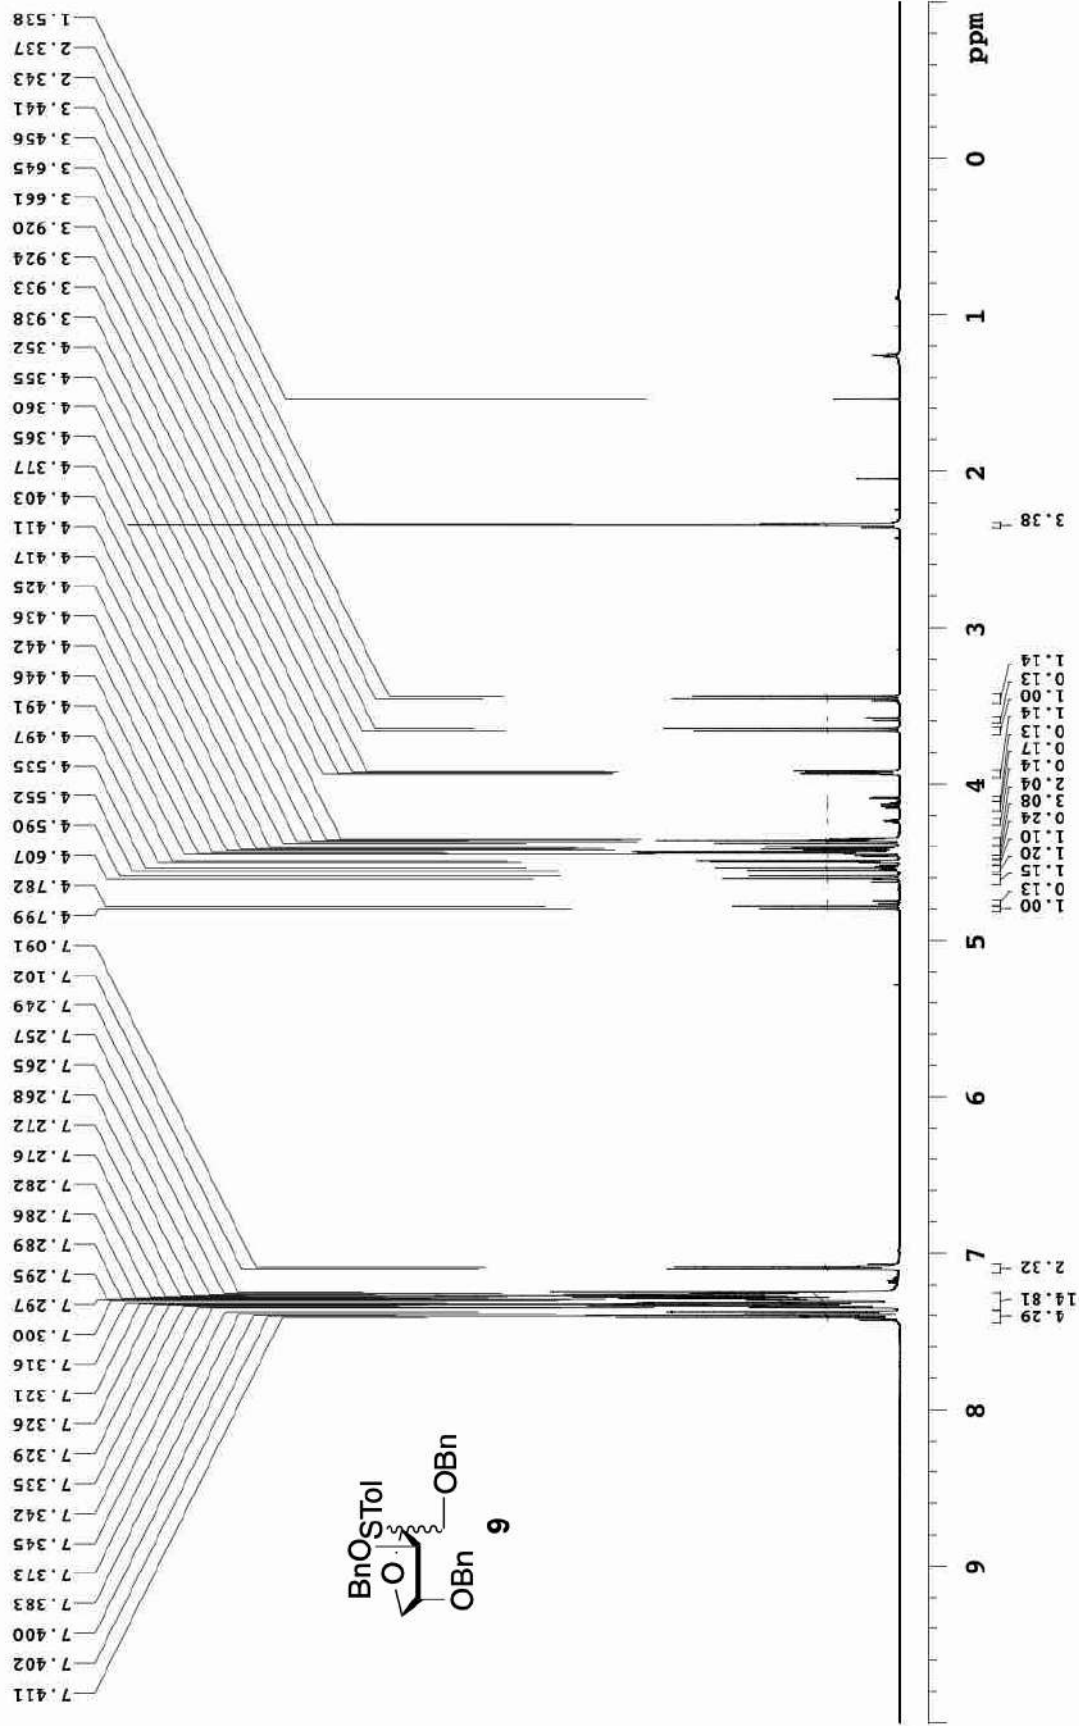



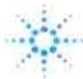

# Agilent Technologies

Department of Chemistry, University of Alberta

Recorded on: **v700, Feb 10 2018**  
Pulse Sequence: **s2pul**

Acquisition Time(s): **1**  
Hz per mm(Hz/mm): **154.05**

Relaxation Delay(s): **1**  
Completed Scans: **180**

**Bo-Shun, Bail-XYL-075**  
175.975 MHz C13(H1) 1D in cdcl3 (ref. to CDC13 @ 77.06 ppm)  
temp 27.5 C -> actual temp = 27.0 C, coldid probe

138.679  
138.350  
138.279  
138.125  
138.062  
136.649  
136.325  
129.507  
128.631  
128.604  
128.539  
128.489  
128.427  
128.204  
128.060  
128.031  
127.997  
127.958  
127.943  
127.918  
127.893  
127.781  
127.639  
127.581  
127.426  
98.492  
96.614  
88.479  
86.186  
84.406  
83.320  
77.410  
77.229  
77.047  
73.664  
73.358  
73.074  
72.505  
72.046  
71.825  
70.122  
69.714  
69.393  
21.453  
21.425

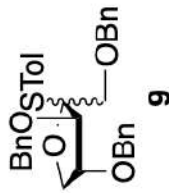

180 160 140 120 100 80 60 40 20 ppm



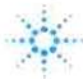

Recorded on: **u500, Feb 8 2018**    Sweep Width(Hz): **6009.62**    Acquisition Time(s): **5**    Relaxation Delay(s): **0.1**  
Pulse Sequence: **PRESAT**    Digital Res.(Hz/pt): **0.09**    Hz per mm(Hz/mm): **25.04**    Completed Scans: **8**

Bo-Shun, Bait-XYL-074  
499.797 MHz H1 1D in cdcl3 (ref. to CDC13 @ 7.26 ppm)  
temp 27.7 C -> actual temp = 27.0 C, coldddual probe

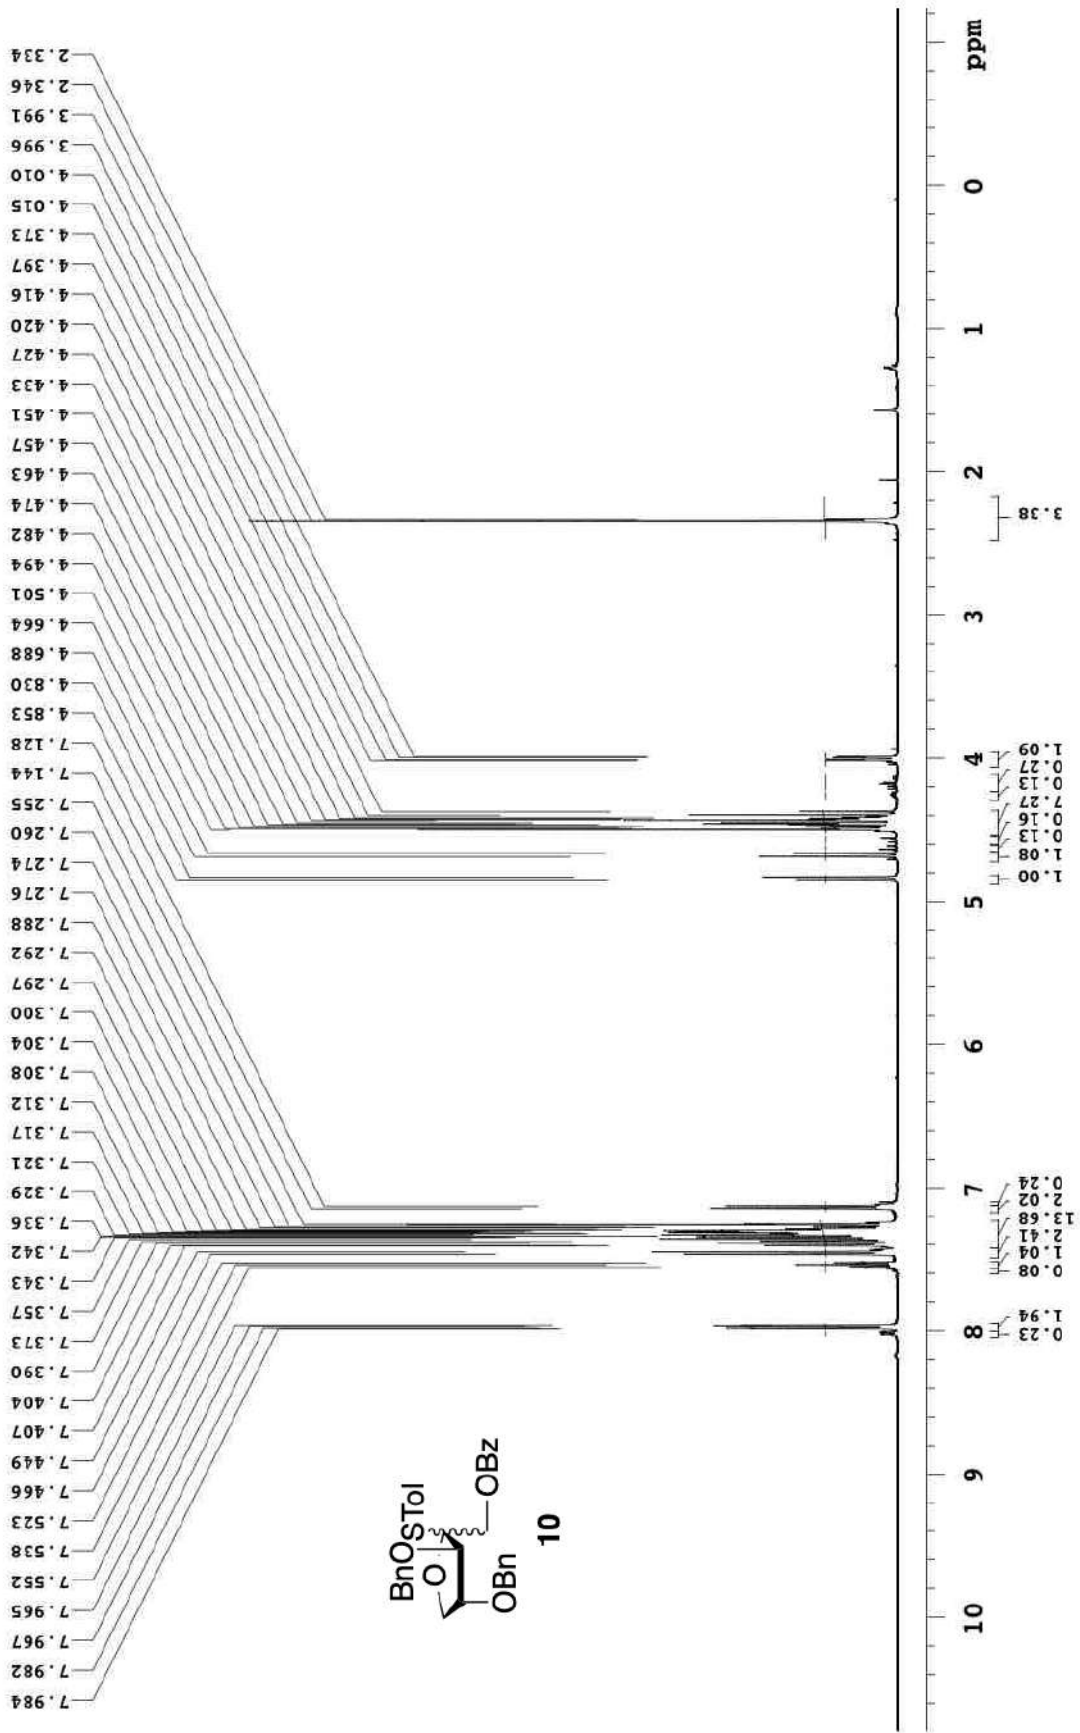



Department of Chemistry, University of Alberta

Recorded on: **u500, Feb 8 2018**  
Pulse Sequence: **s2pul**

Sweep Width(Hz): **33783.8**  
Digital Res.(Hz/pt): **0.26**

Acquisition Time(s): **1**  
Hz per mm(Hz/mm): **109.97**

Relaxation Delay(s): **1**  
Completed Scans: **48**

B0-Shun, Bait-XYL-074  
125.668 MHz C13(H1) 1D in cdcl3 (ref. to CDC13 @ 77.06 ppm)  
temp 27.7 C -> actual temp = 27.0 C, coldlual probe

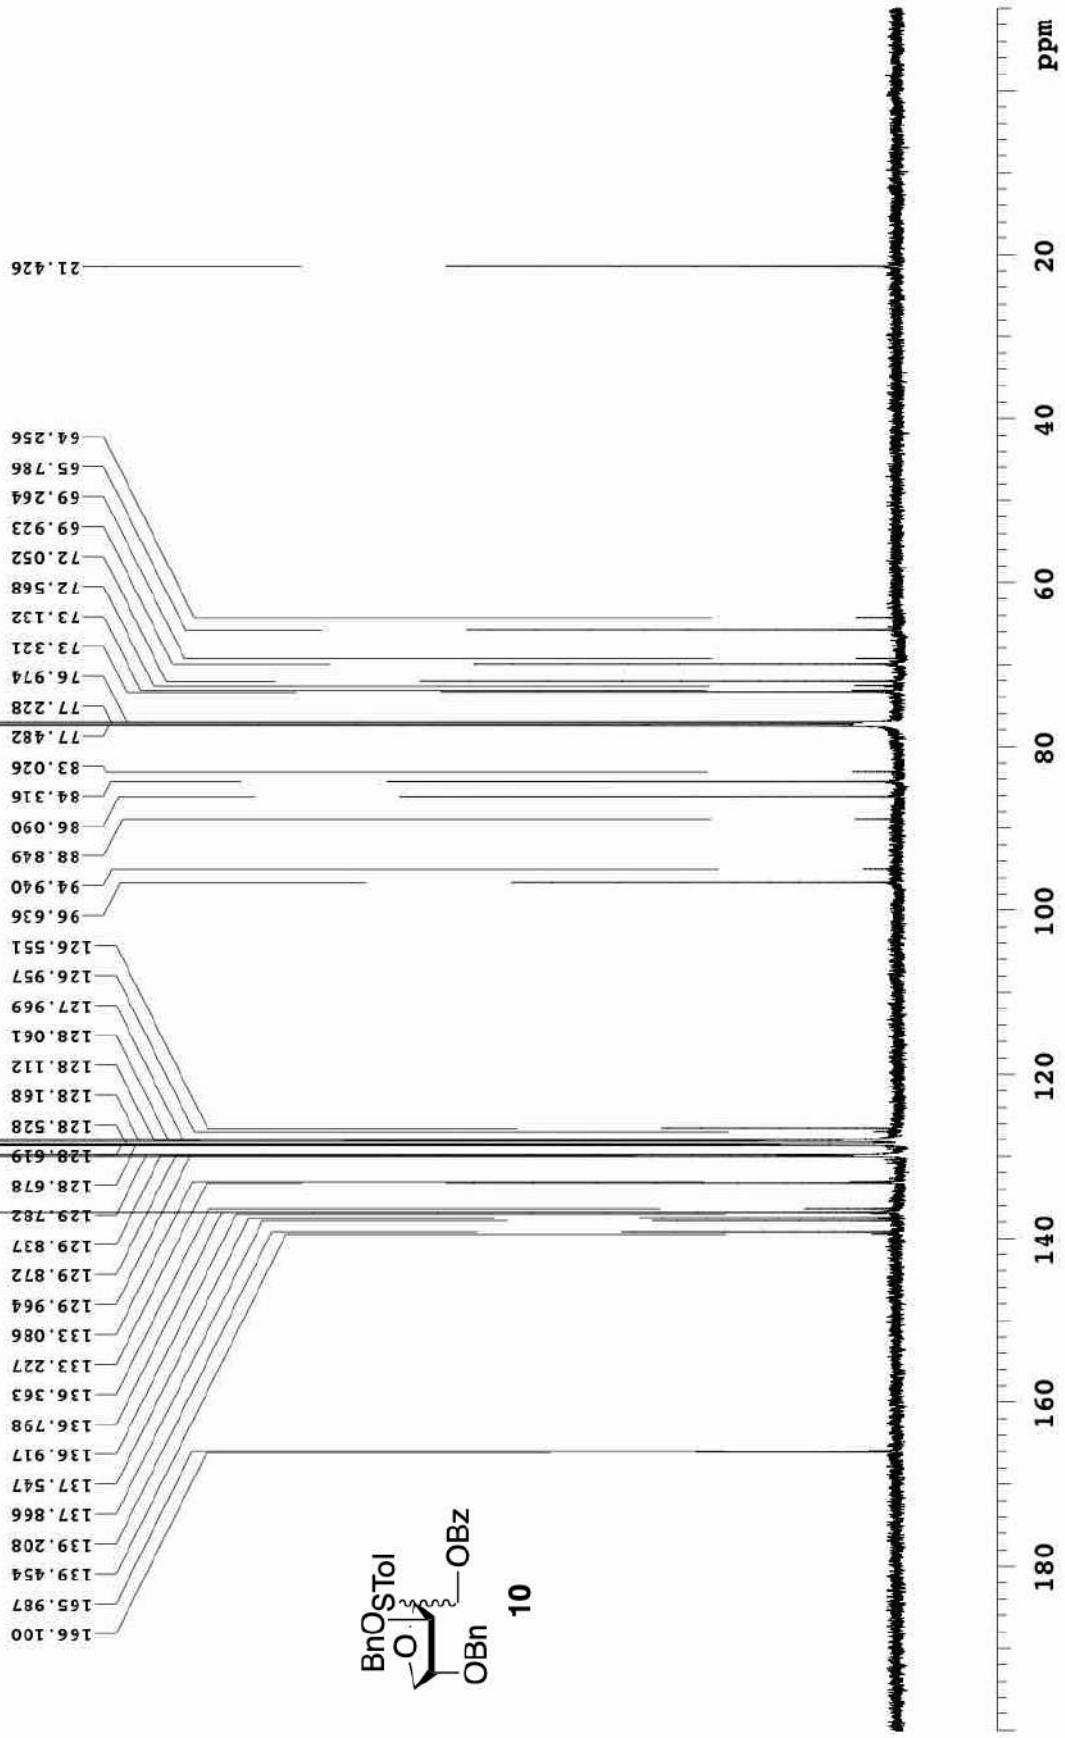

S94

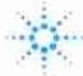

Department of Chemistry, University of Alberta

Recorded on: **u500, Jul 12 2017**  
Pulse Sequence: **PRESAT**

Acquisition Time(s): **5**  
Hz per mm(Hz/mm): **22.91**

Relaxation Delay(s): **0.1**  
Completed Scans: **8**

Bo-Shun, Baii-XYL-024  
499.797 MHz H1 1D in cdcl3 (ref. to CDC13 @ 7.26 ppm)  
temp 27.7 C -> actual temp = 27.0 C, coldddal probe

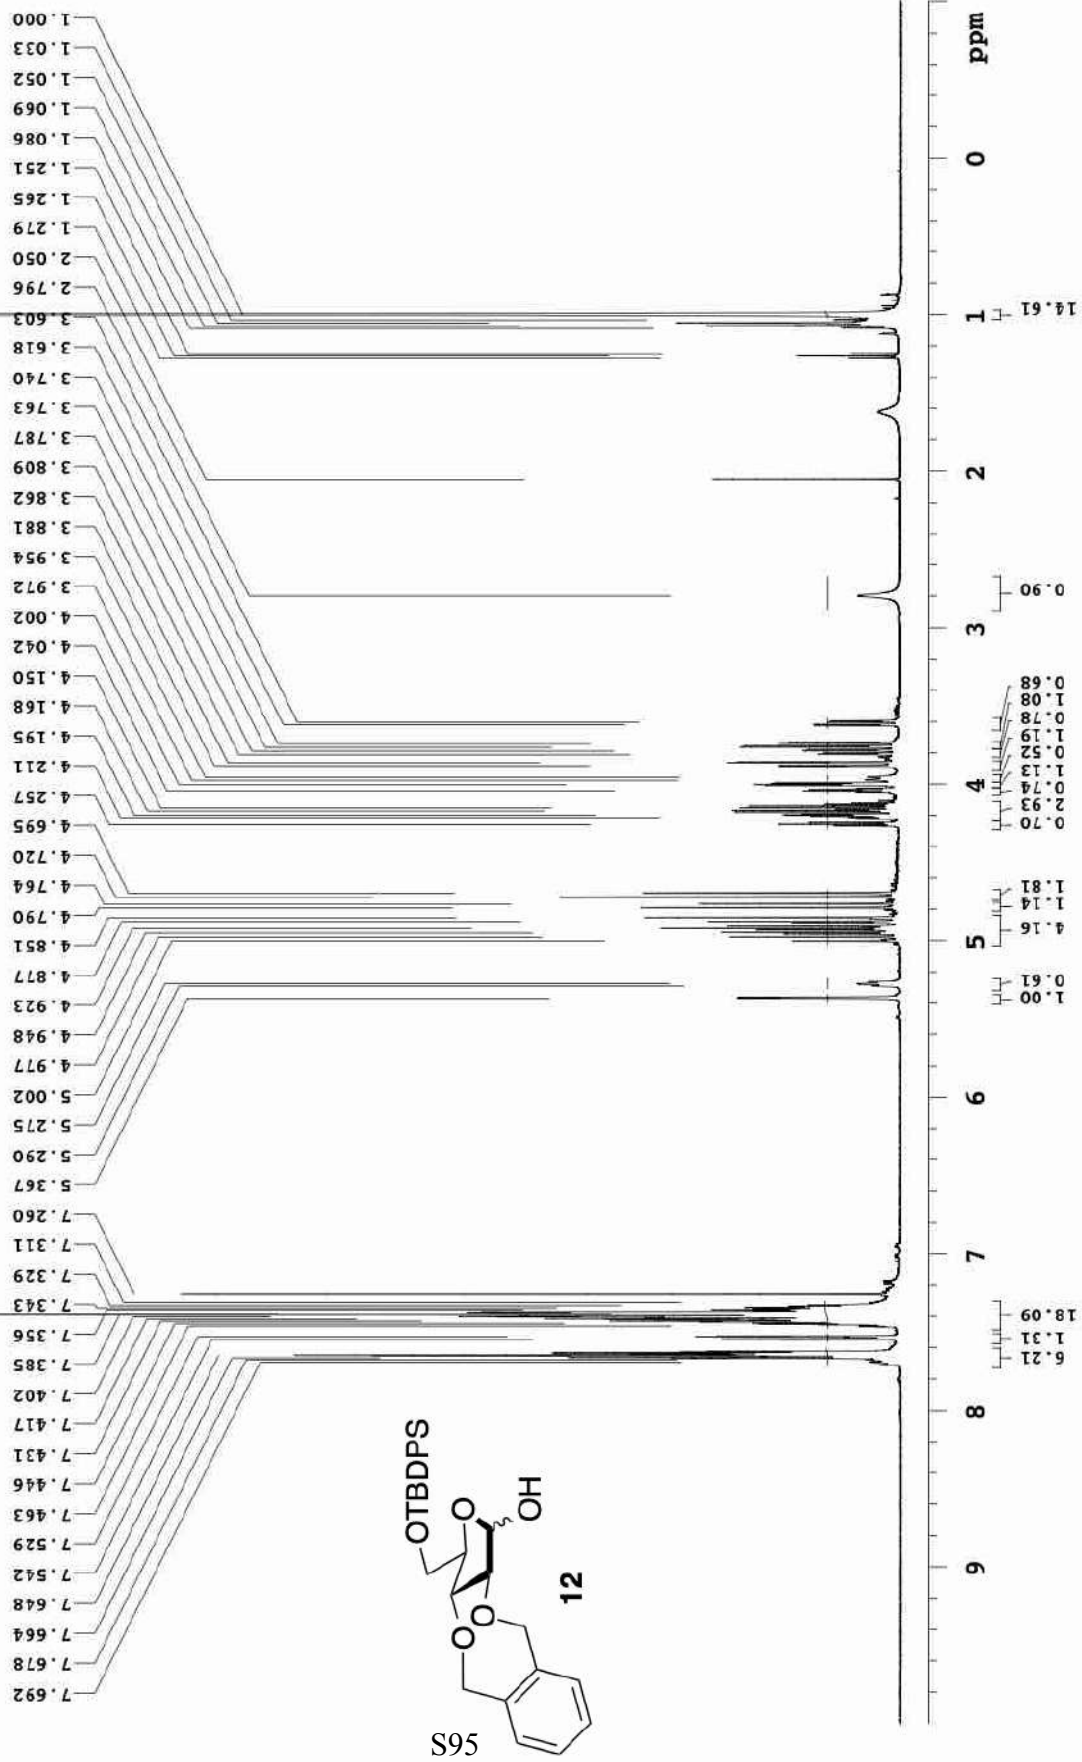

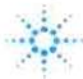

Recorded on: **u500, Jul 12 2017**      Sweep Width(Hz): **33783.8**      Acquisition Time(s): **1**      Relaxation Delay(s): **1**  
Pulse Sequence: **s2pul**      Digital Res.(Hz/mm): **109.9**      Hz per mm(Hz/mm): **109.9**      Completed Scans: **40**

**Bo-Shun, Baii-XYL-024**  
125.688 MHz C13(H1) 1D in cdcl3 (ref. to CDC13 @ 77.06 ppm)  
temp 27.7 C -> actual temp = 27.0 C, coldludal probe

136.433  
136.370  
136.224  
136.025  
135.927  
135.845  
135.757  
133.667  
133.611  
132.676  
132.518  
131.938  
131.913  
131.622  
131.606  
130.170  
130.090  
129.883  
129.831  
129.813  
128.055  
128.035  
127.865  
127.844  
102.546  
97.787  
88.499  
83.866  
83.804  
81.860  
80.947  
80.190  
77.483  
77.229  
76.974  
70.022  
69.614  
68.847  
68.678  
64.827  
63.223  
26.958  
19.501  
19.357

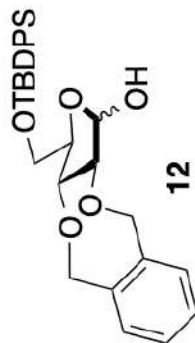

180    160    140    120    100    80    60    40    20    ppm



Recorded on: **v700, Mar 6 2016**    Sweep Width(Hz): **8385.26**    Acquisition Time(s): **5**    Relaxation Delay(s): **0.1**  
 Pulse Sequence: **PRESAT**    Digital Res.(Hz/pt): **0.13**    Hz per mm(Hz/mm): **34.95**    Completed Scans: **16**

Bo-Shun, Ball-XYL-025  
 699.762 MHz H1 PRESAT in cdcl3 (ref. to CDCl3 @ 7.26 ppm), temp 27.5 C-> actual temp = 27.0 C, coldid probe

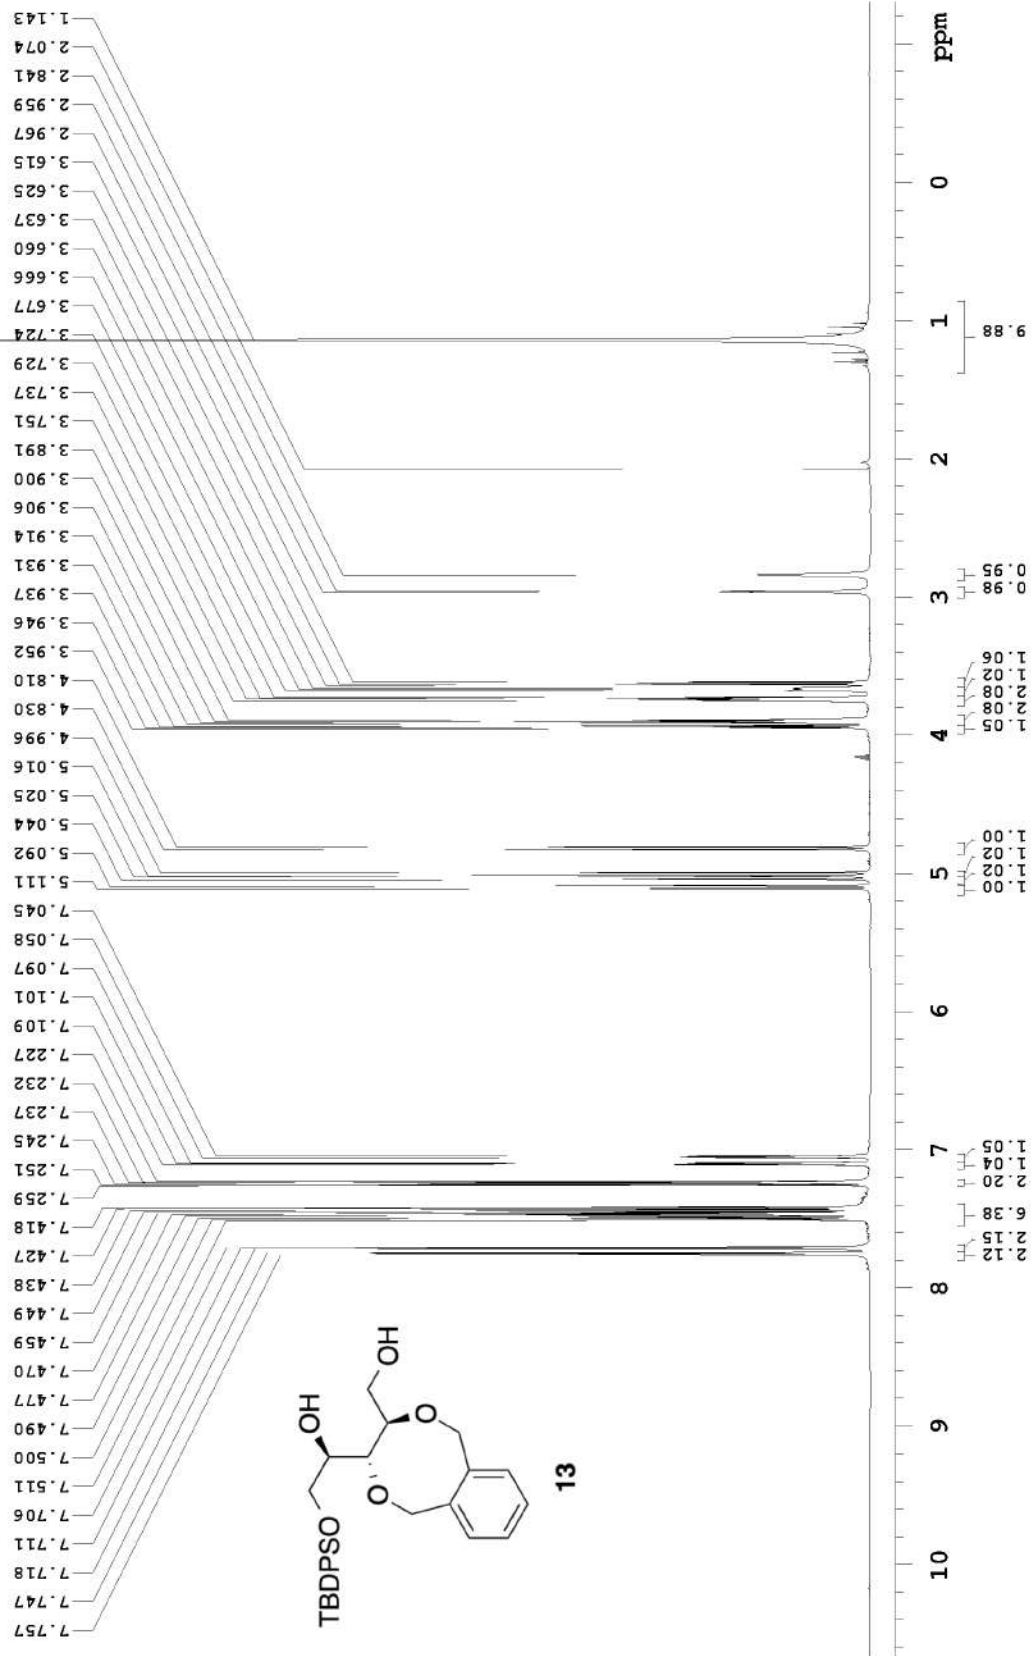





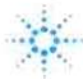

Department of Chemistry, University of Alberta

Recorded on: **u500, Jan 10 2018**

Pulse Sequence: **s2pul**

Sweep Width(Hz): **33783.8**

Digital Res.(Hz/pt): **0.26**

Acquisition Time(s): **1**

Hz per mm(Hz/mm): **109.97**

Relaxation Delay(s): **1**

Completed Scans: **76**

Bo-Shun, Bai-XYL-029-data  
125.688 MHz C13(H1) 1D in cdcl3 (ref. to CDC13 @ 77.06 ppm)  
temp 27.7 C -> actual temp = 27.0 C, coldlual probe

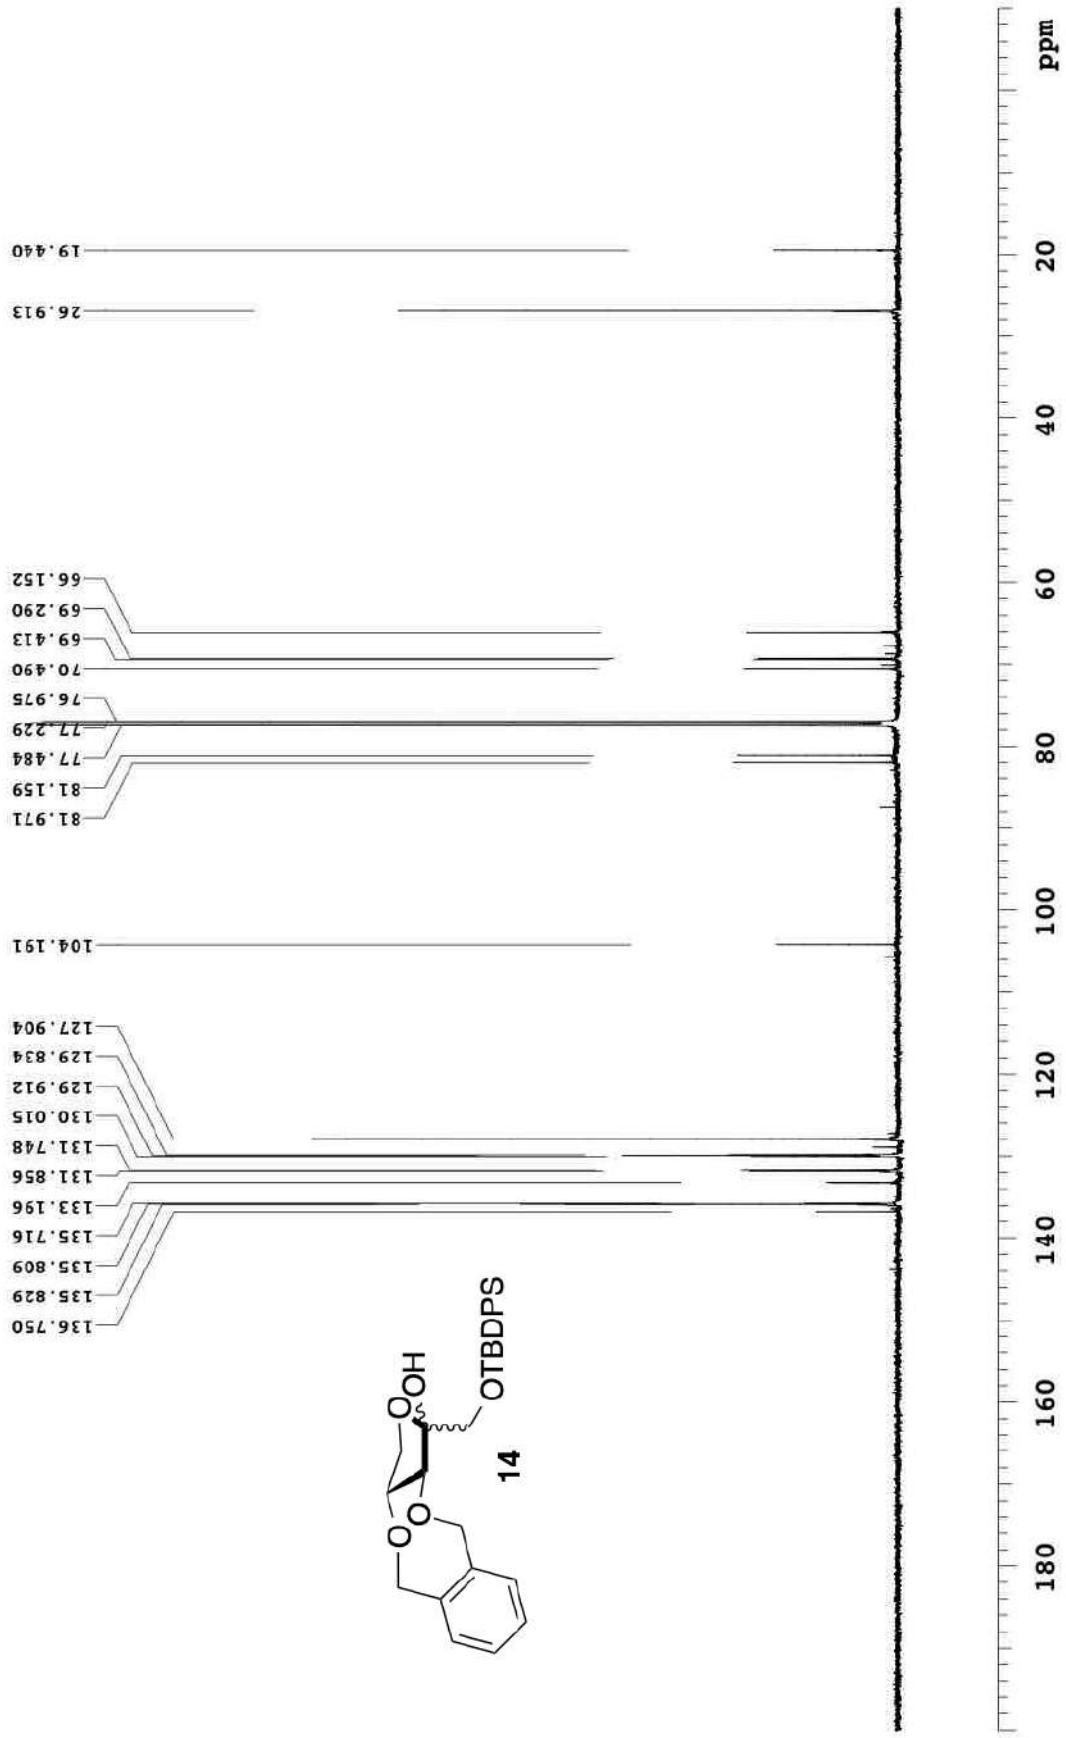

S100



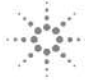

# Agilent Technologies

Recorded on: **u500, May 28 2016**  
Pulse Sequence: **PRESAT**

Sweep Width(Hz): **6009.62**  
Digital Res.(Hz/pt): **0.09**

Acquisition Time(s): **5**  
Hz per mm(Hz/mm): **25.04**

Relaxation Delay(s): **0.1**  
Completed Scans: **16**

Bo-Shun, Ball-XYL-036  
499.806 MHz H1 PRESAT in cdcl3 (ref. to CDC13 @ 7.26 ppm), temp 27.7 C -> actual temp = 27.0 C, coldldual probe

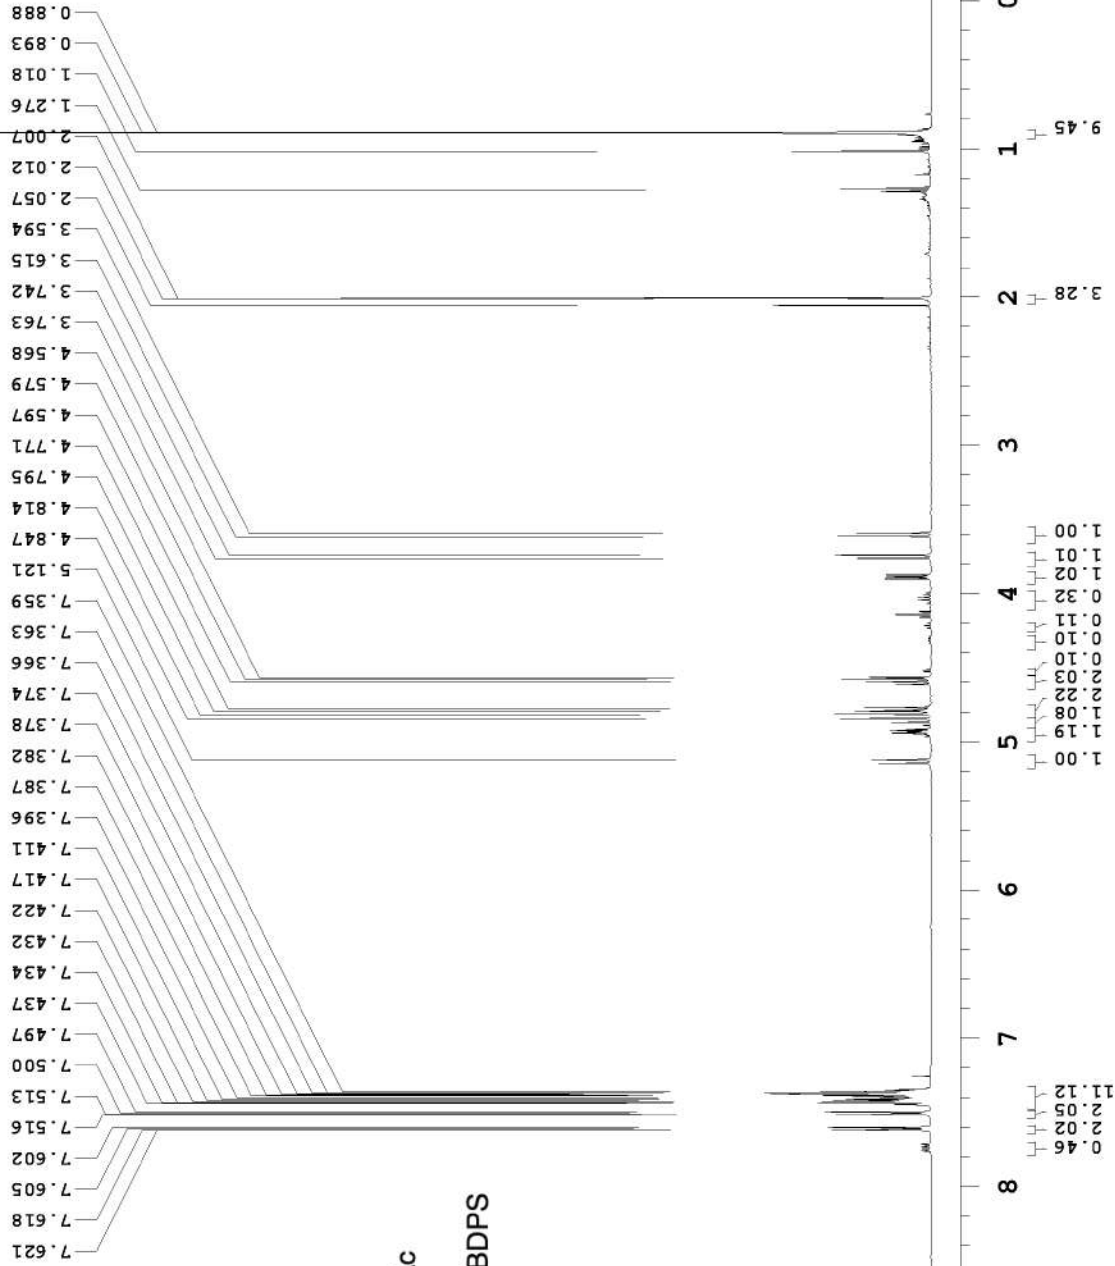

S101

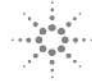

**Agilent Technologies**

Recorded on: **u500, May 28 2016**  
 Pulse Sequence: **s2pul**

Sweep Width(Hz): **32894.7**  
 Digital Res.(Hz/pt): **0.25**

Acquisition Time(s): **2.5**  
 Hz per mm(Hz/mm): **137.06**

Relaxation Delay(s): **0.1**  
 Completed Scans: **128**

Bo-Shun, Ball-XYL-036  
 125.691 MHz C13[H1] 1D in cdcl3 (ref. to CDC13 @ 77.06 ppm), temp 27.7 C -> actual temp = 27.0 C, coldlual probe

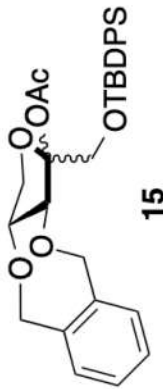

S102

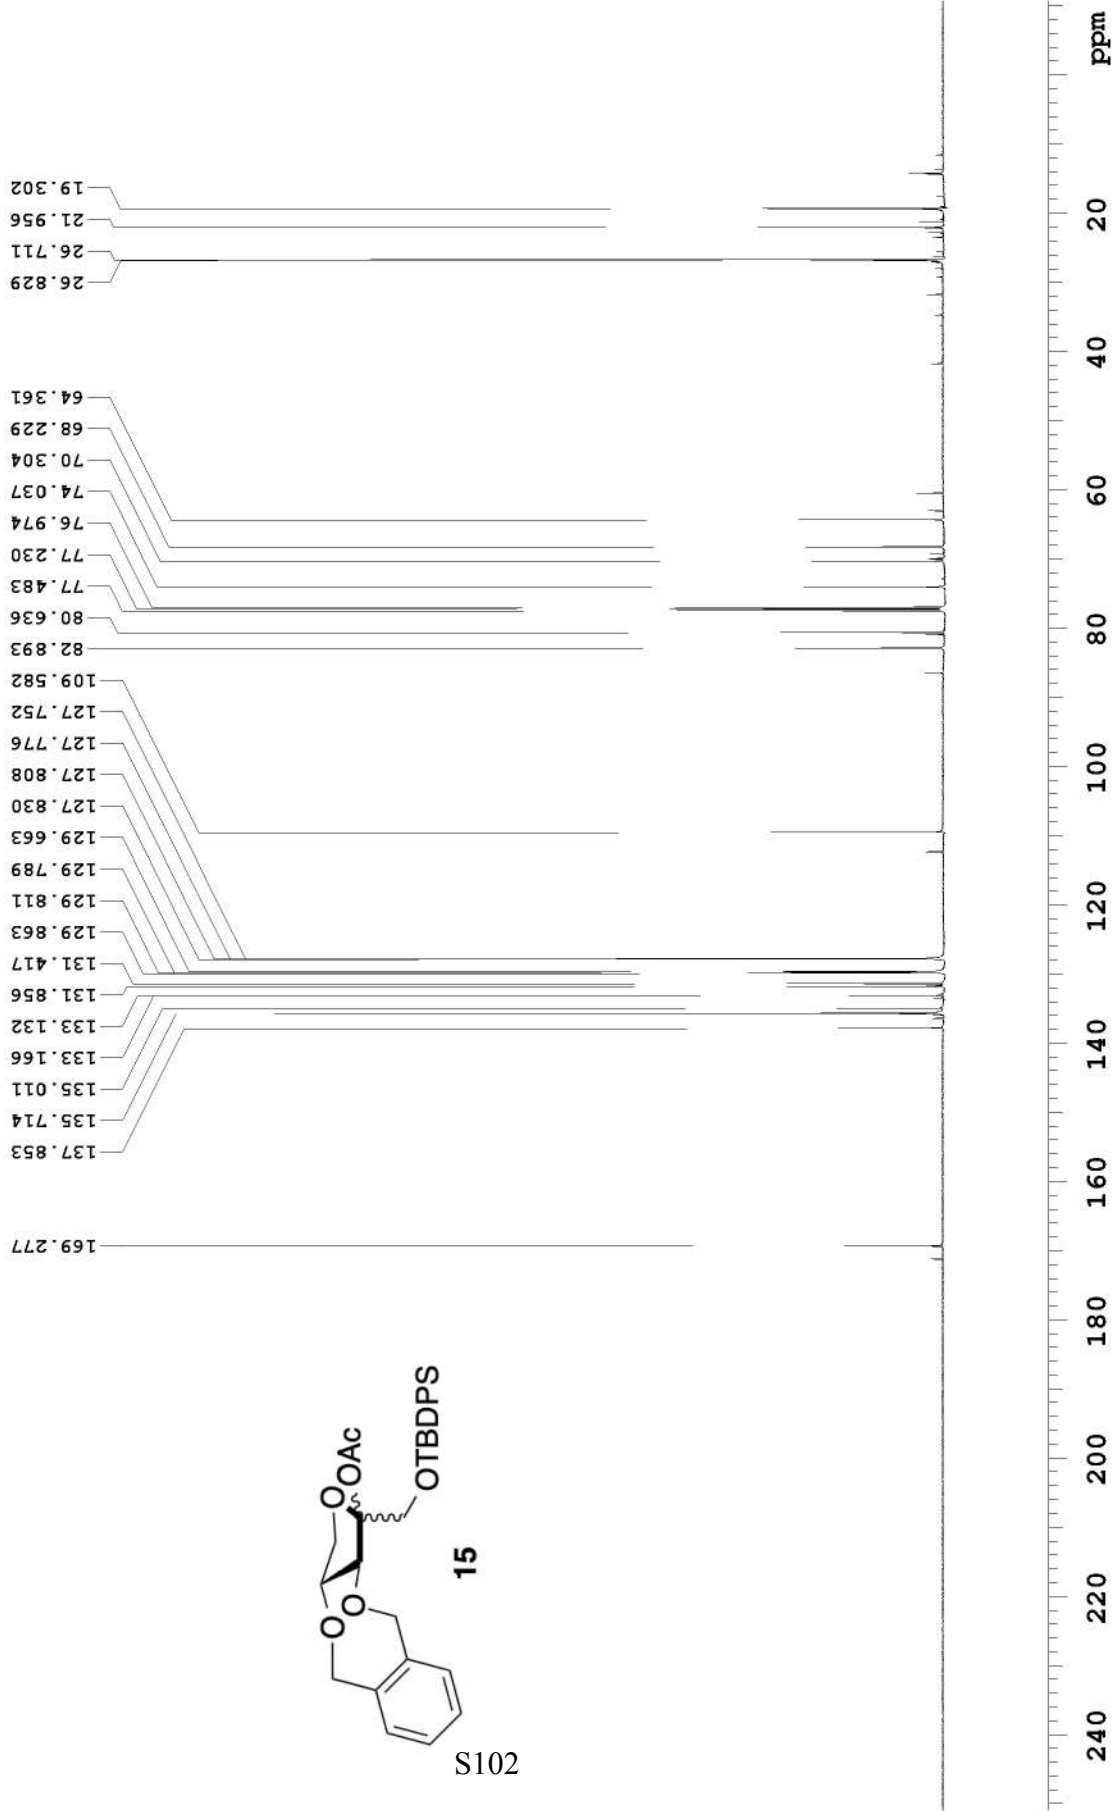

Recorded on: **u500, Jan 11 2018** Sweep Width(Hz): **6009.62** Acquisition Time(s): **5** Relaxation Delay(s): **0.1**  
 Pulse Sequence: **PRESAT** Digital Res.(Hz/ppm): **0.09** Hz per mm(Hz/mm): **25.04** Completed Scans: **8**

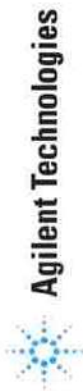

Bo-Shun, Ball-XYL-037-UP  
 499.797 MHz H1 1D in cdcl3 (ref. to CDCl3 @ 7.26 ppm)  
 temp 27.7 C -> actual temp = 27.0 C, coldluid probe

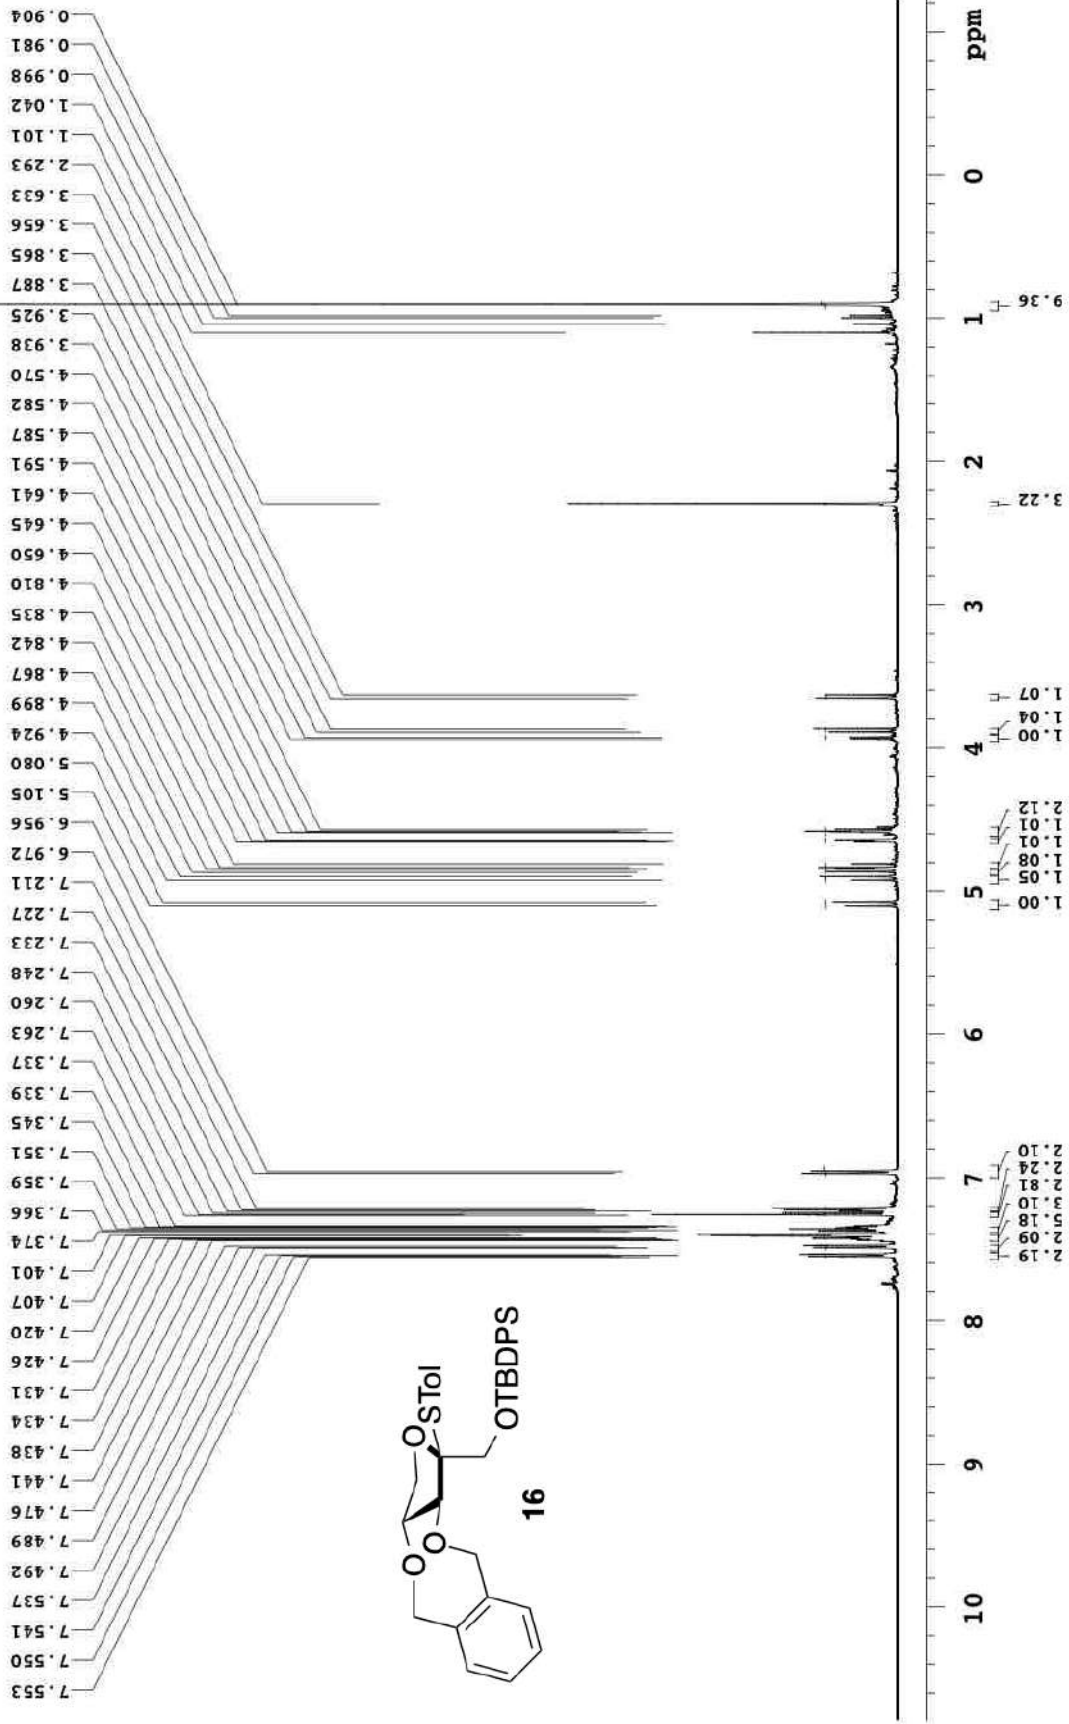

S103



Recorded on: v700, Dec 5 2016 Sweep Width(Hz): 8389.26 Acquisition Time(s): 5 Relaxation Delay(s): 0.1  
 Pulse Sequence: PRESAT Digital Res.(Hz/mm): 0.13 Hz per mm(Hz/mm): 32.09 Completed Scans: 16

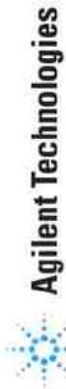

Bo-Shun, Ball-XYL-065  
 699.762 MHz H1 1D in cdcl3 (ref. to CDCl3 @ 7.26 ppm)  
 temp 27.5 C -> actual temp = 27.0 C, coldid probe

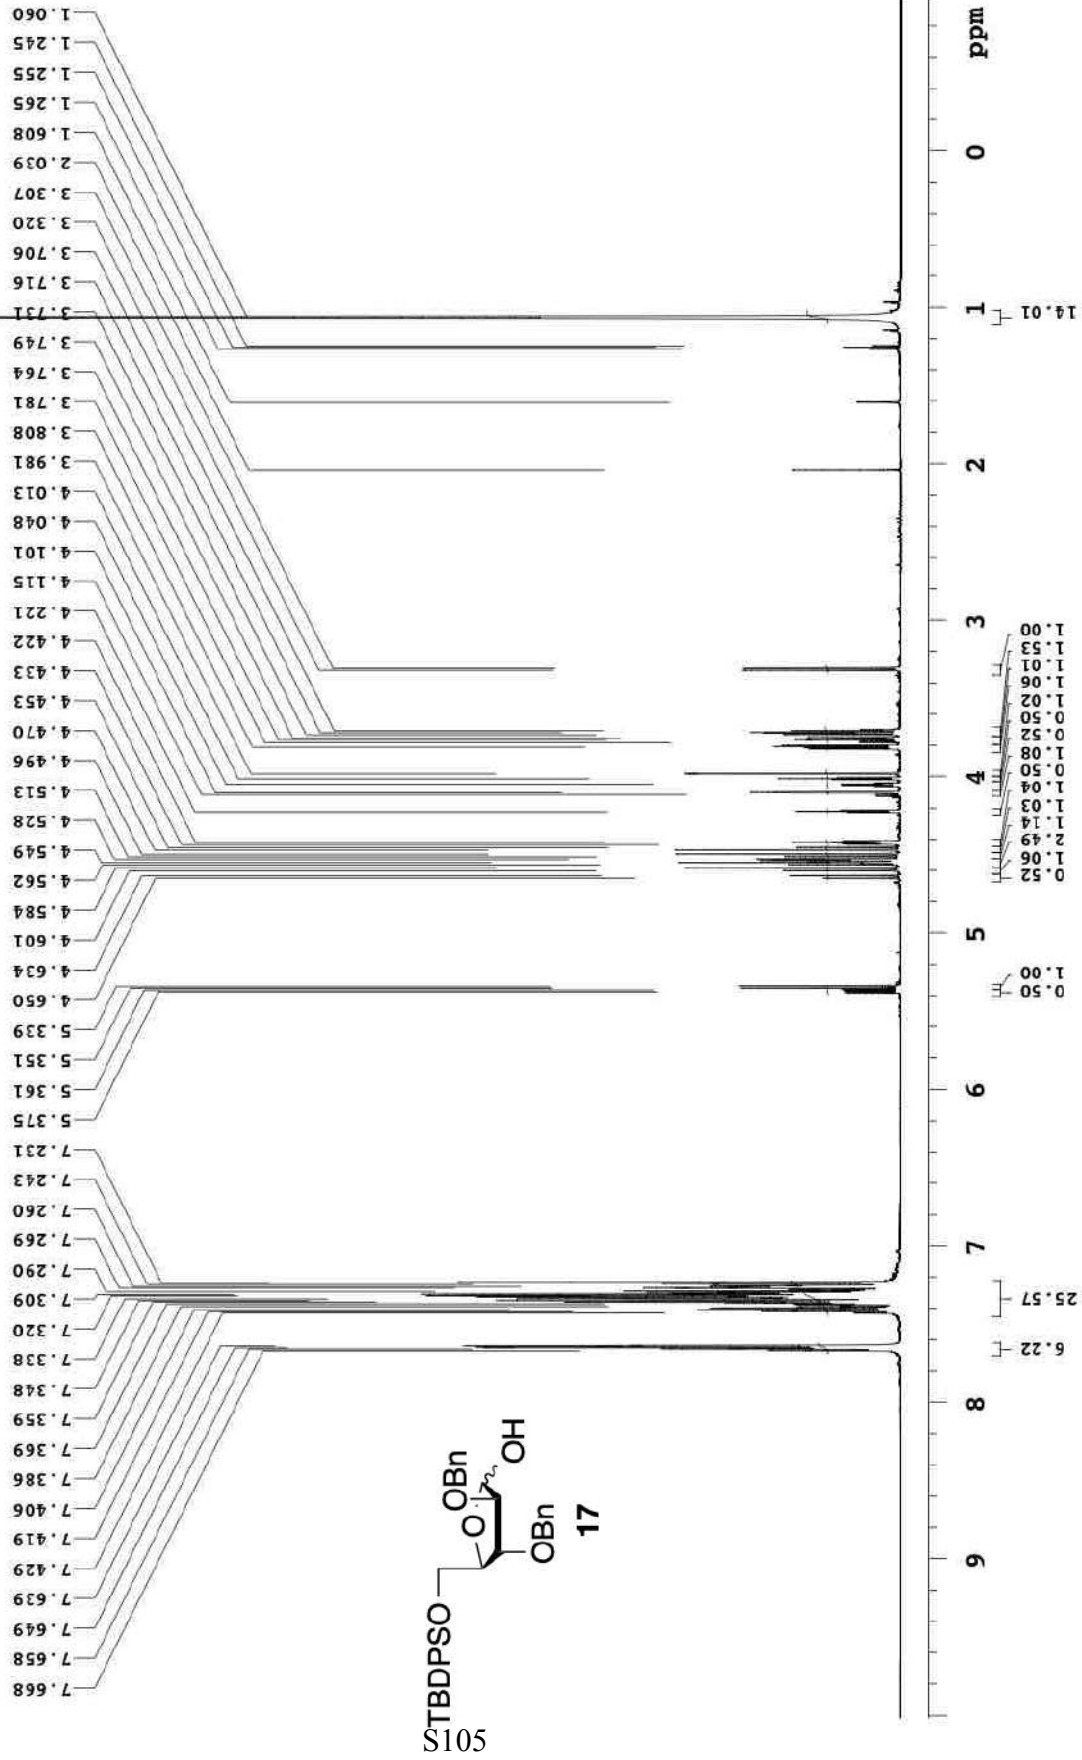



Recorded on: v700, Dec 5 2016  
 Pulse Sequence: s2pul

Sweep Width(Hz): 48076.9  
 Digital Res.(Hz/pt): 0.37

Acquisition Time(s): 1  
 Hz per mm(Hz/mm): 154.18

Relaxation Delay(s): 1  
 Completed Scans 256

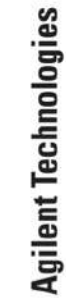

Bo-Shun, Ball-XYL-065  
 175.975 MHz C13(H1) 1D in cdcl3 (ref. to CDCl3 @ 77.06 ppm)  
 temp 27.5 C -> actual temp = 27.0 C; coldid probe

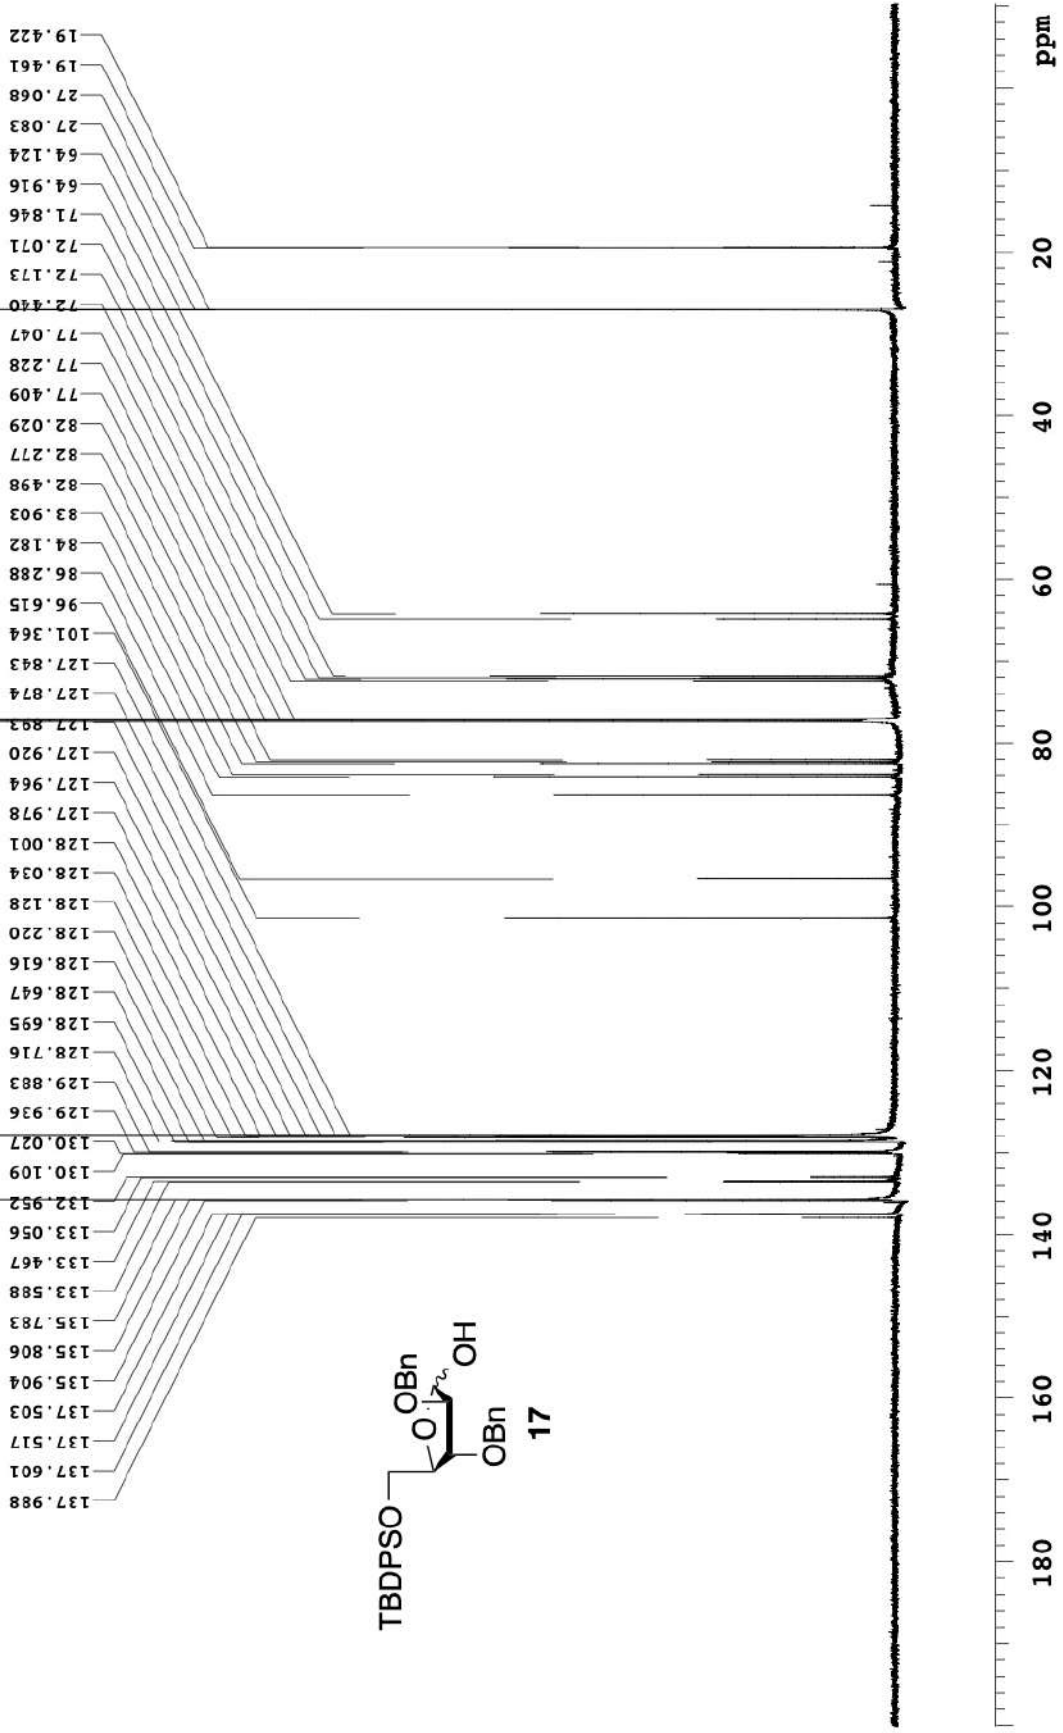







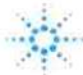

Relaxation Delay(s): 0.1  
Completed Scans: 8

Acquisition Time(s): 5  
Hz per mm(Hz/mm): 25.04

Recorded on: u500, Feb 1 2018  
Sweep Width(Hz): 6009.62  
Pulse Sequence: PRESAT  
Digital Res.(Hz/ppm): 0.09

Bo-Shun, Ball-XYL-068  
499.797 MHz H1 1D in cdcl3 (ref. to CDCl3 @ 7.26 ppm)  
temp 27.7 C -> actual temp = 27.0 C, coldludal probe

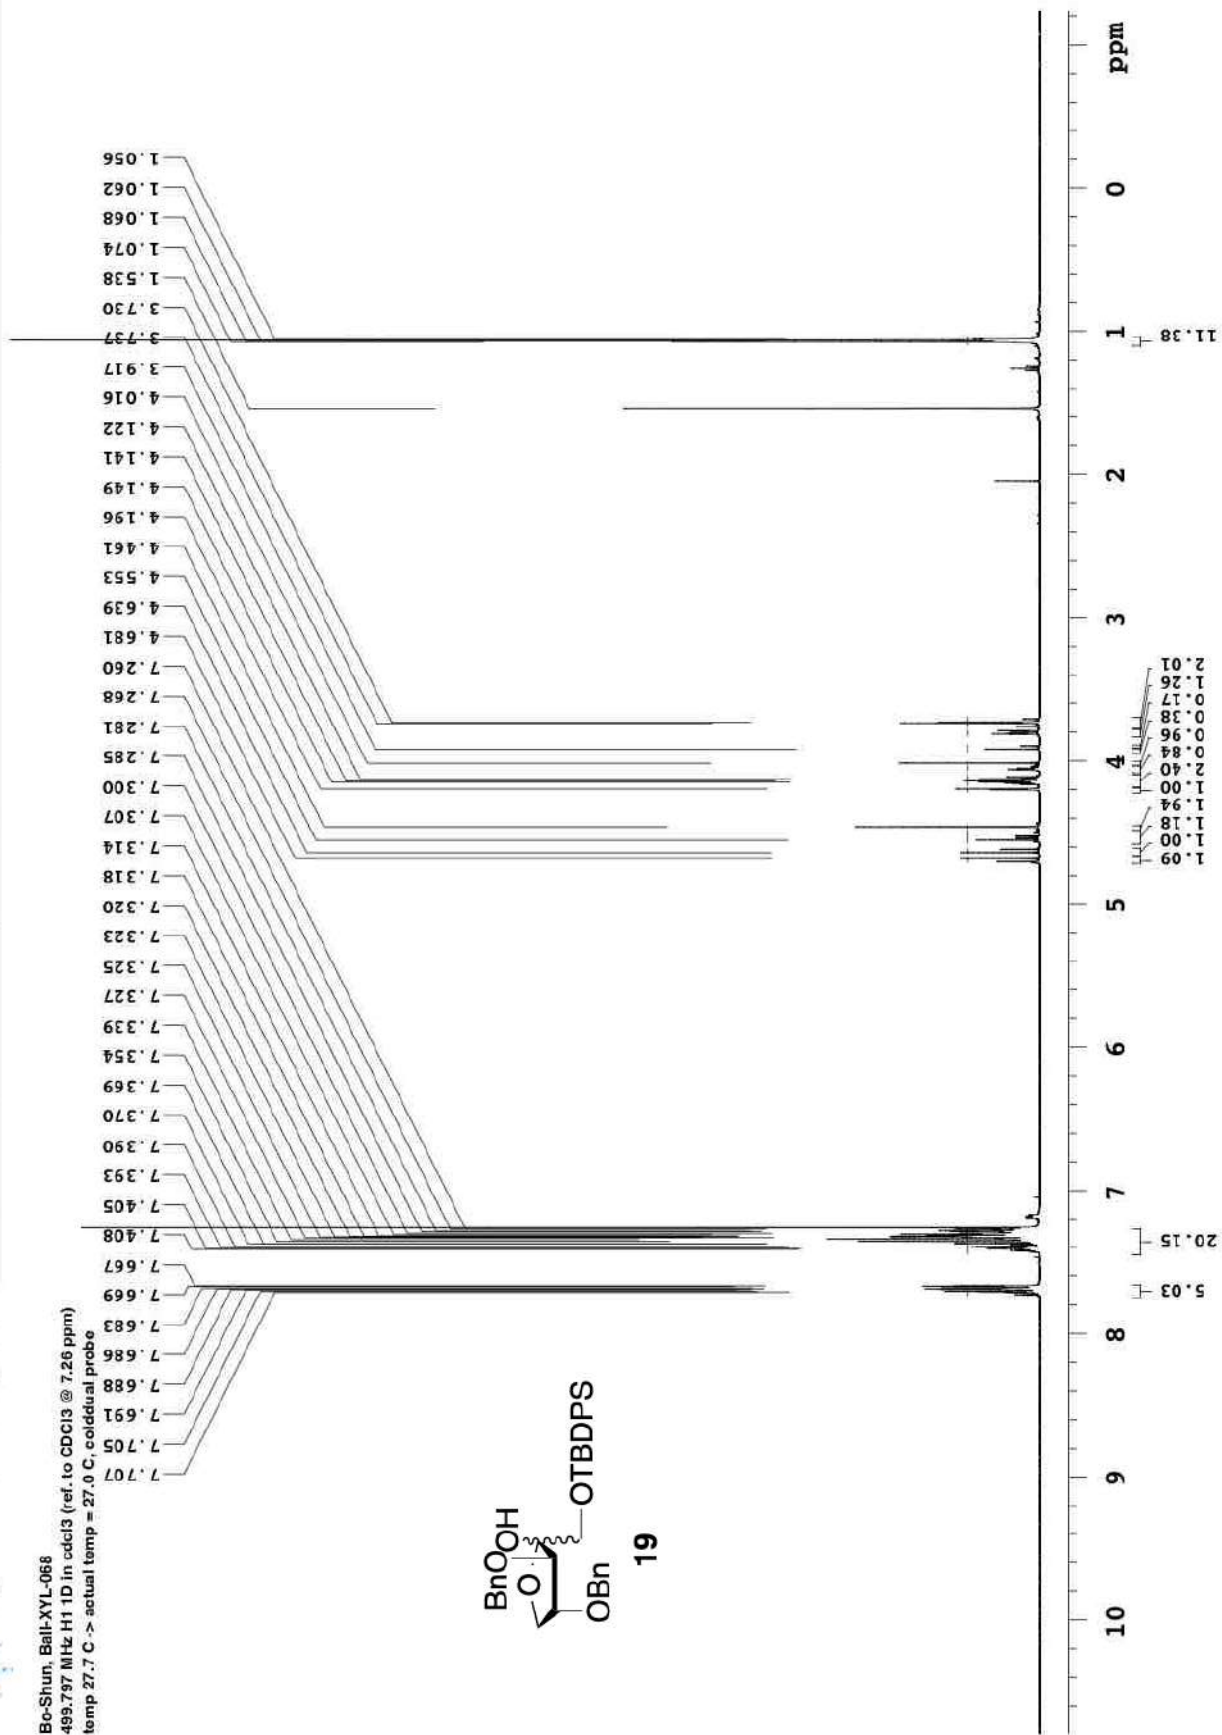

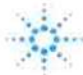

Department of Chemistry, University of Alberta

Recorded on: **u500, Feb 1 2018**  
Pulse Sequence: **s2pul**

Sweep Width(Hz): **33783.8**  
Digital Res.(Hz/ppm): **0.26**

Acquisition Time(s): **1**  
Hz per mm(Hz/mm): **109.97**

Relaxation Delay(s): **1**  
Completed Scans: **812**

Bo-Shun, Ball-XYL-068  
125.688 MHz C13(H1) 1D in cdcl3 (ref. to CDC13 @ 77.06 ppm)  
temp 27.7 C -> actual temp = 27.0 C, coldliald probe

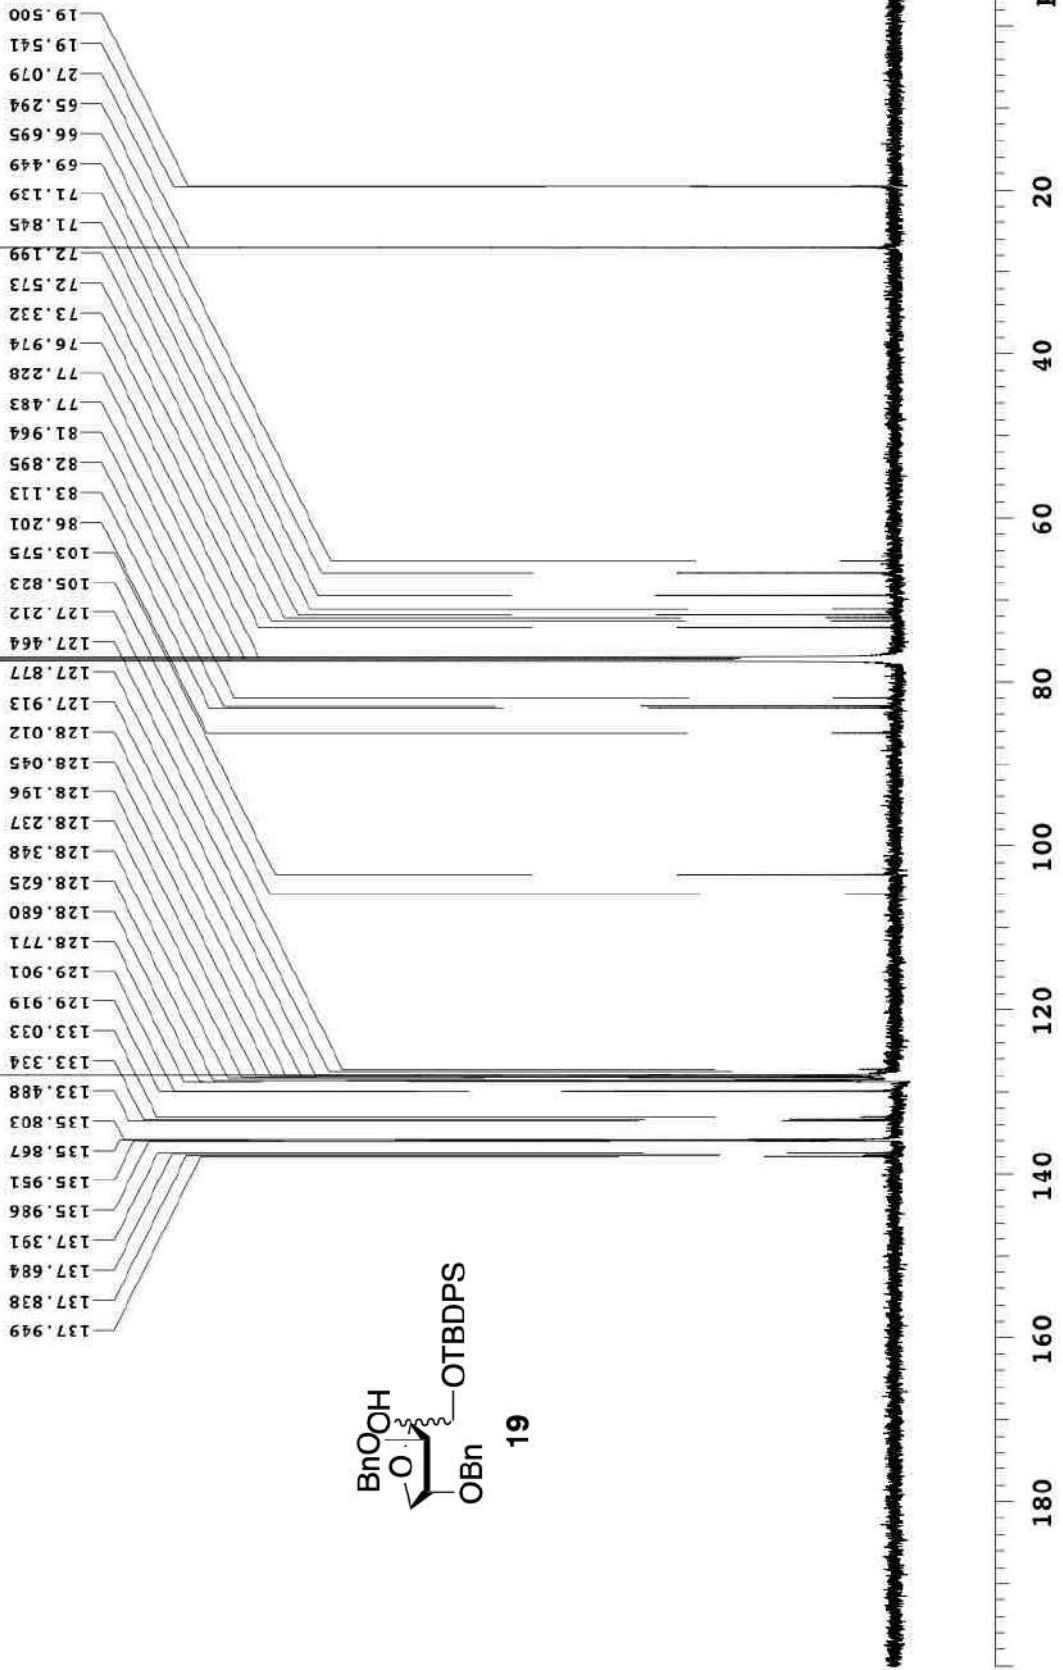



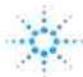

Department of Chemistry, University of Alberta

Recorded on: **u500, Feb 7 2018**    Sweep Width(Hz): **33783.8**    Acquisition Time(s): **1**    Relaxation Delay(s): **1**  
Pulse Sequence: **s2pul**    Digital Res.(Hz/ppm): **109.97**    Hz per mm(Hz/mm): **109.97**    Completed Scans: **128**

Bo-Shun, Ball-XYL-069  
125.688 MHz C13(H1) 1D in cdcl3 (ref. to CDC13 @ 77.06 ppm)  
temp 27.7 C -> actual temp = 27.0 C, coldlial probe

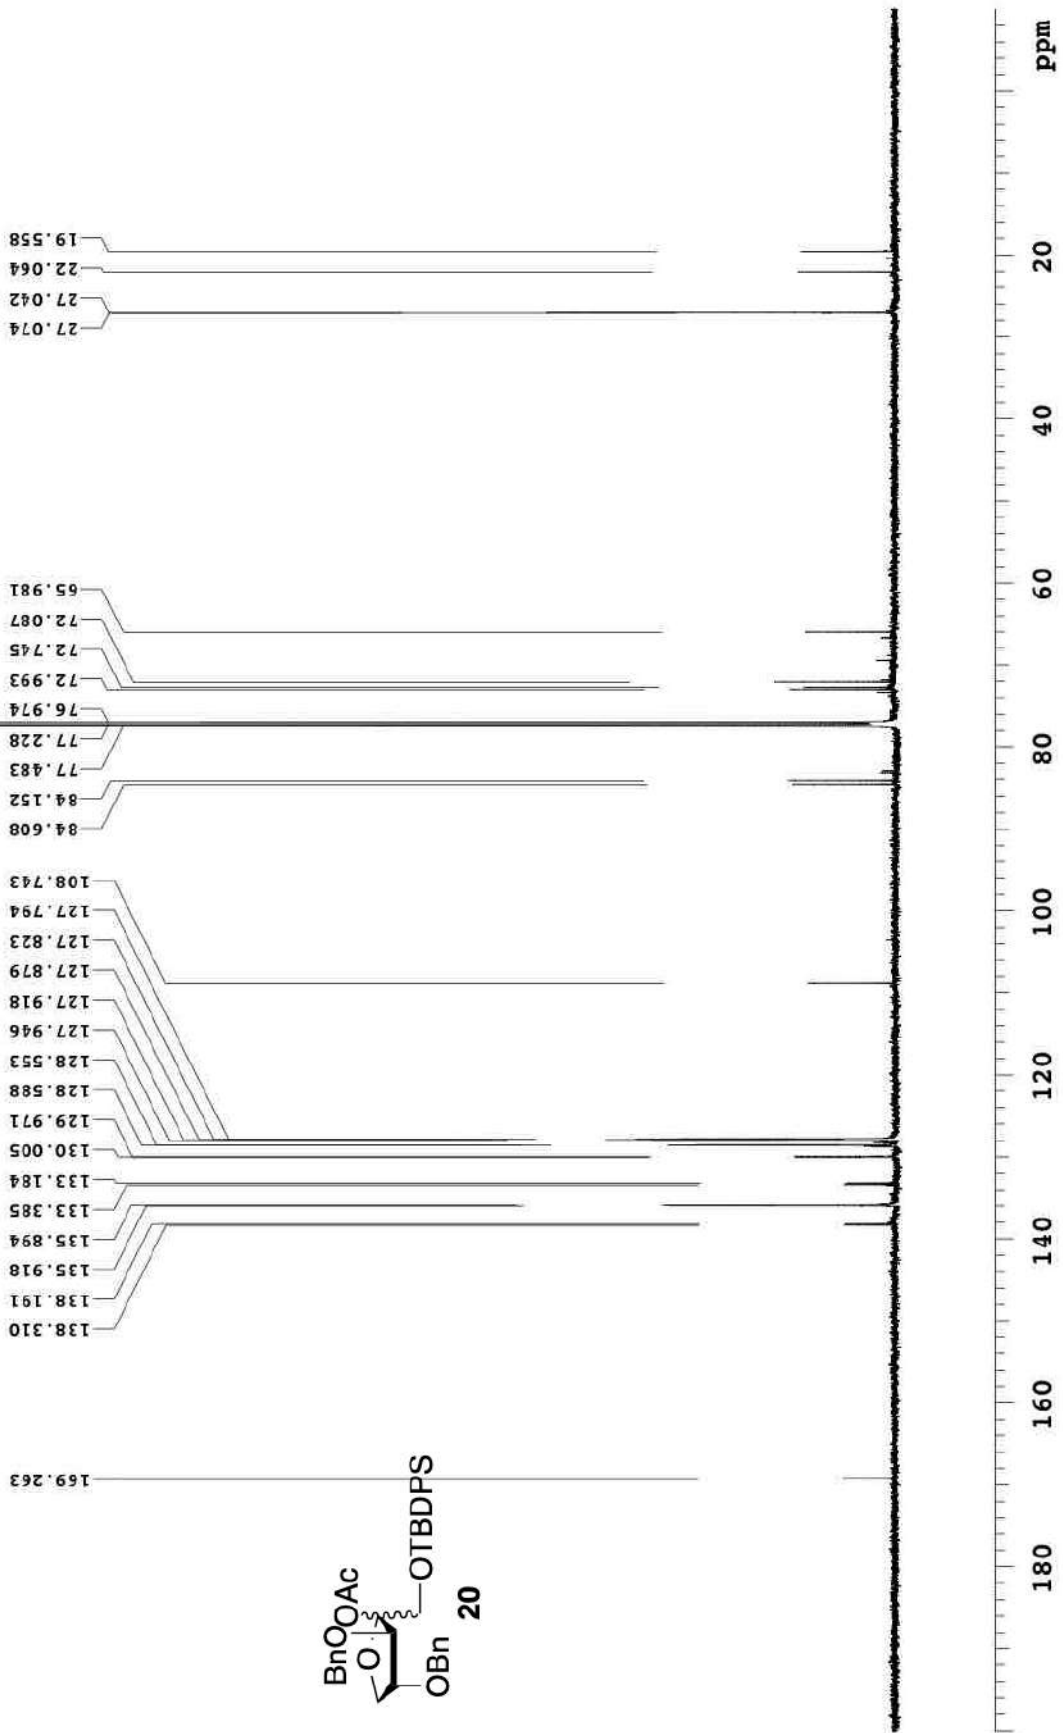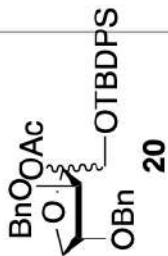

S112









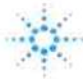

# Agilent Technologies

Department of Chemistry, University of Alberta

Relaxation Delay(s): 1  
Completed Scans: 256

Acquisition Time(s): 1  
Hz per mm(Hz/mm): 110.08

Sweep Width(Hz): 33783.8  
Digital Res.(Hz/pt): 0.26

Recorded on: u500, Nov 29 2016  
Pulse Sequence: s2pul

Bo-Shun, Ball-XYL-054  
125.688 MHz C13[H1] 1D in cdcl3 (ref. to CDCB @ 77.06 ppm), temp 27.7 C -> actual temp = 27.0 C, coldstart probe

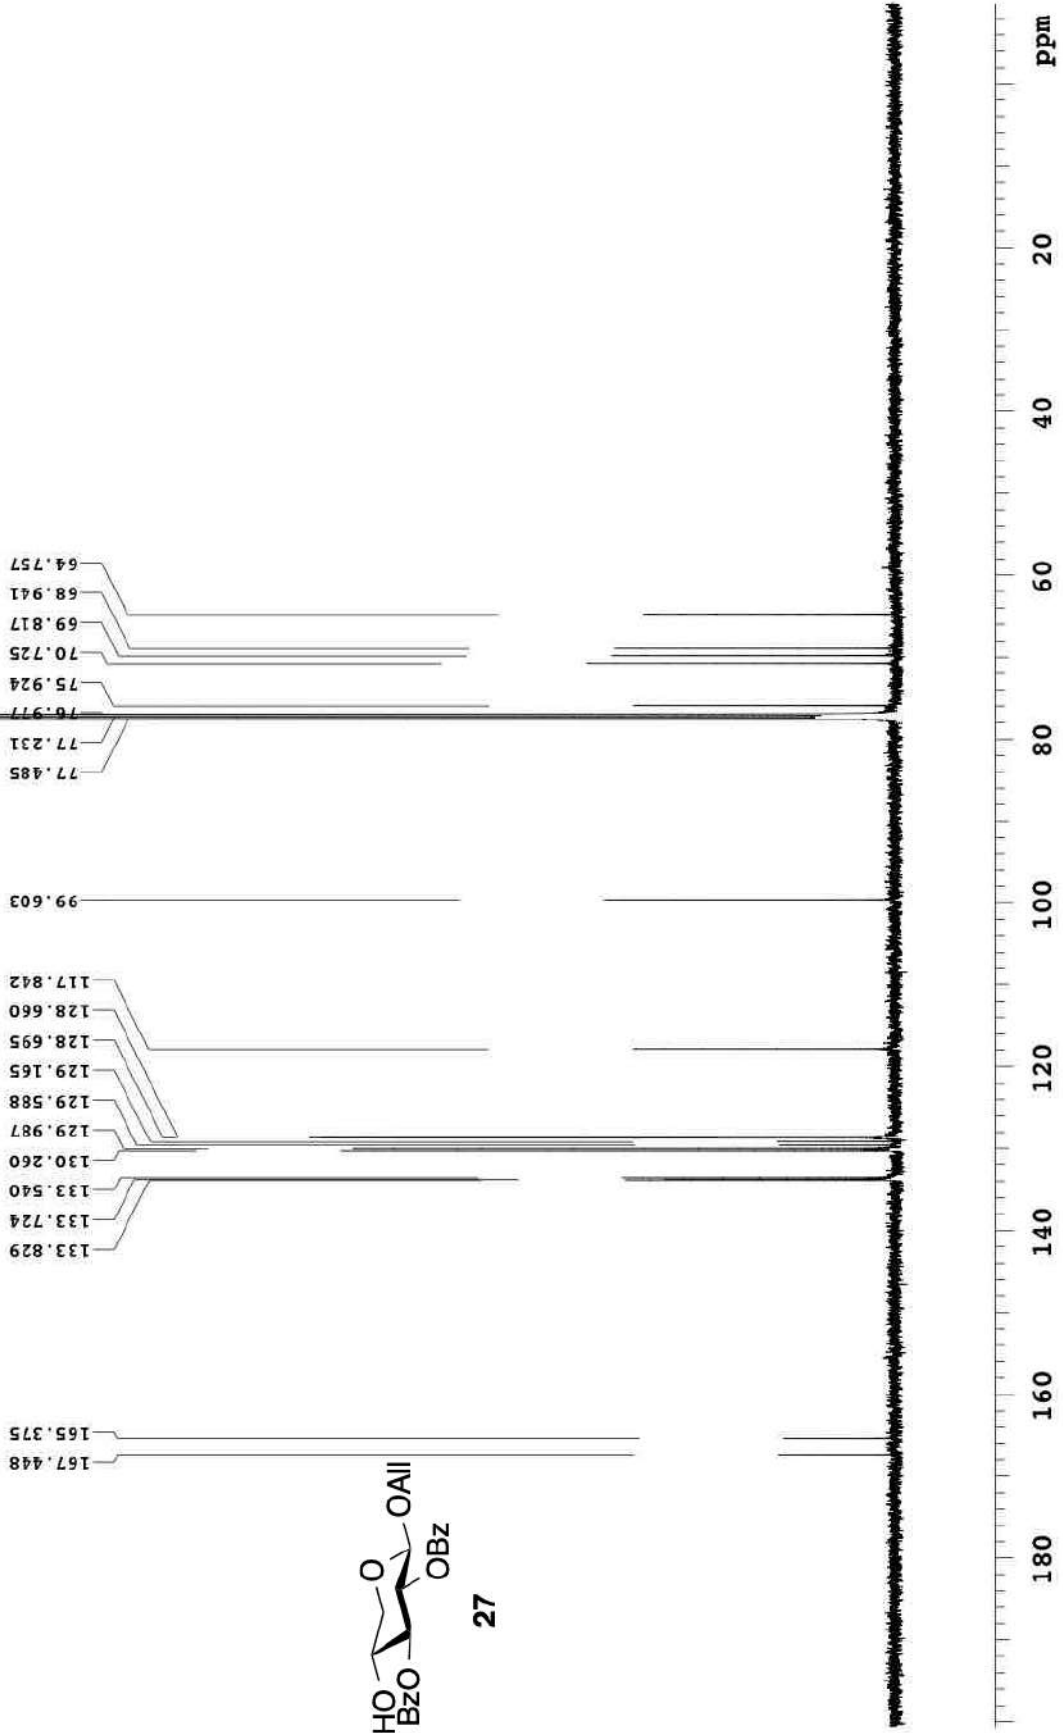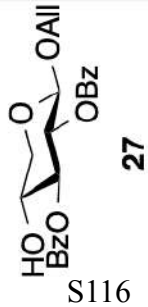

S116



Bo-Shun, Ball-XYL-052  
 499.797 MHz H1 PRESAT in cdcl3 (ref. to CDCl3 @ 7.26 ppm), temp 27.7 C -> actual temp = 27.0 C., coldludal probe

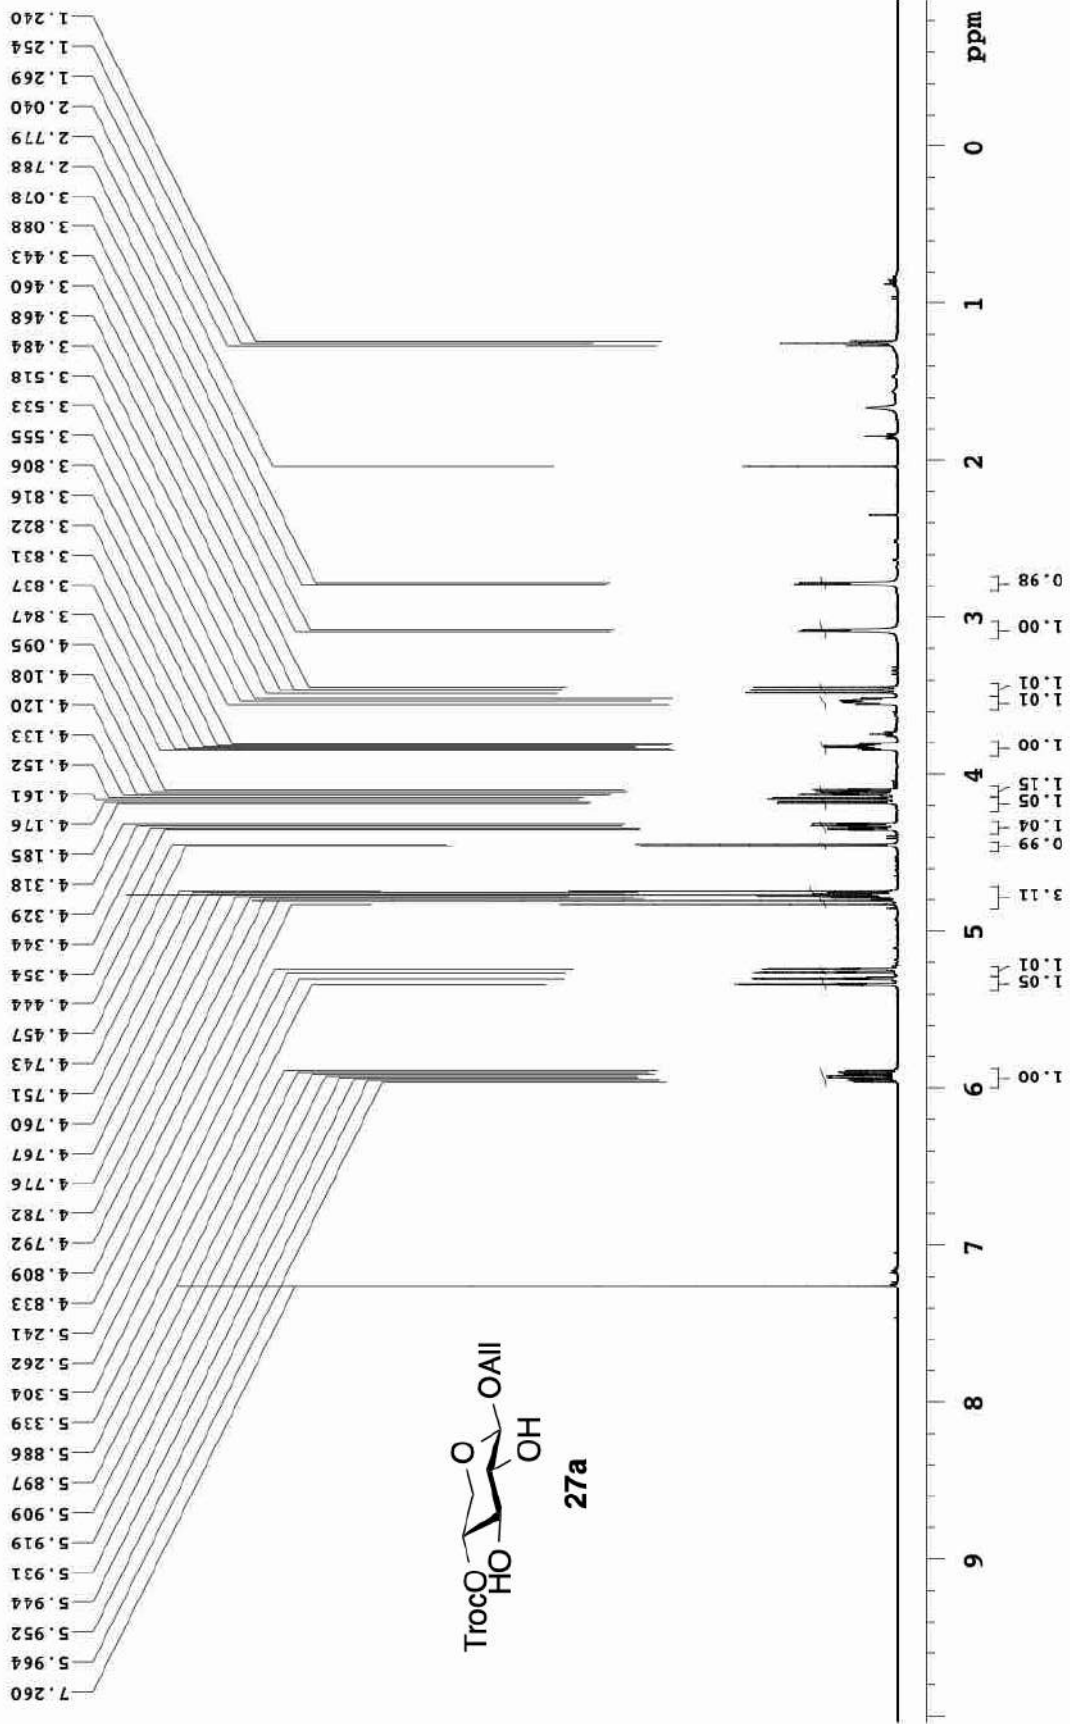



Bo-Shun, Ball-XYL-040-1  
 499.806 MHz H1 PRESAT in cdcl3 (ref. to CDC13 @ 7.26 ppm), temp 27.7 C -> actual temp = 27.0 C., coldchd probe

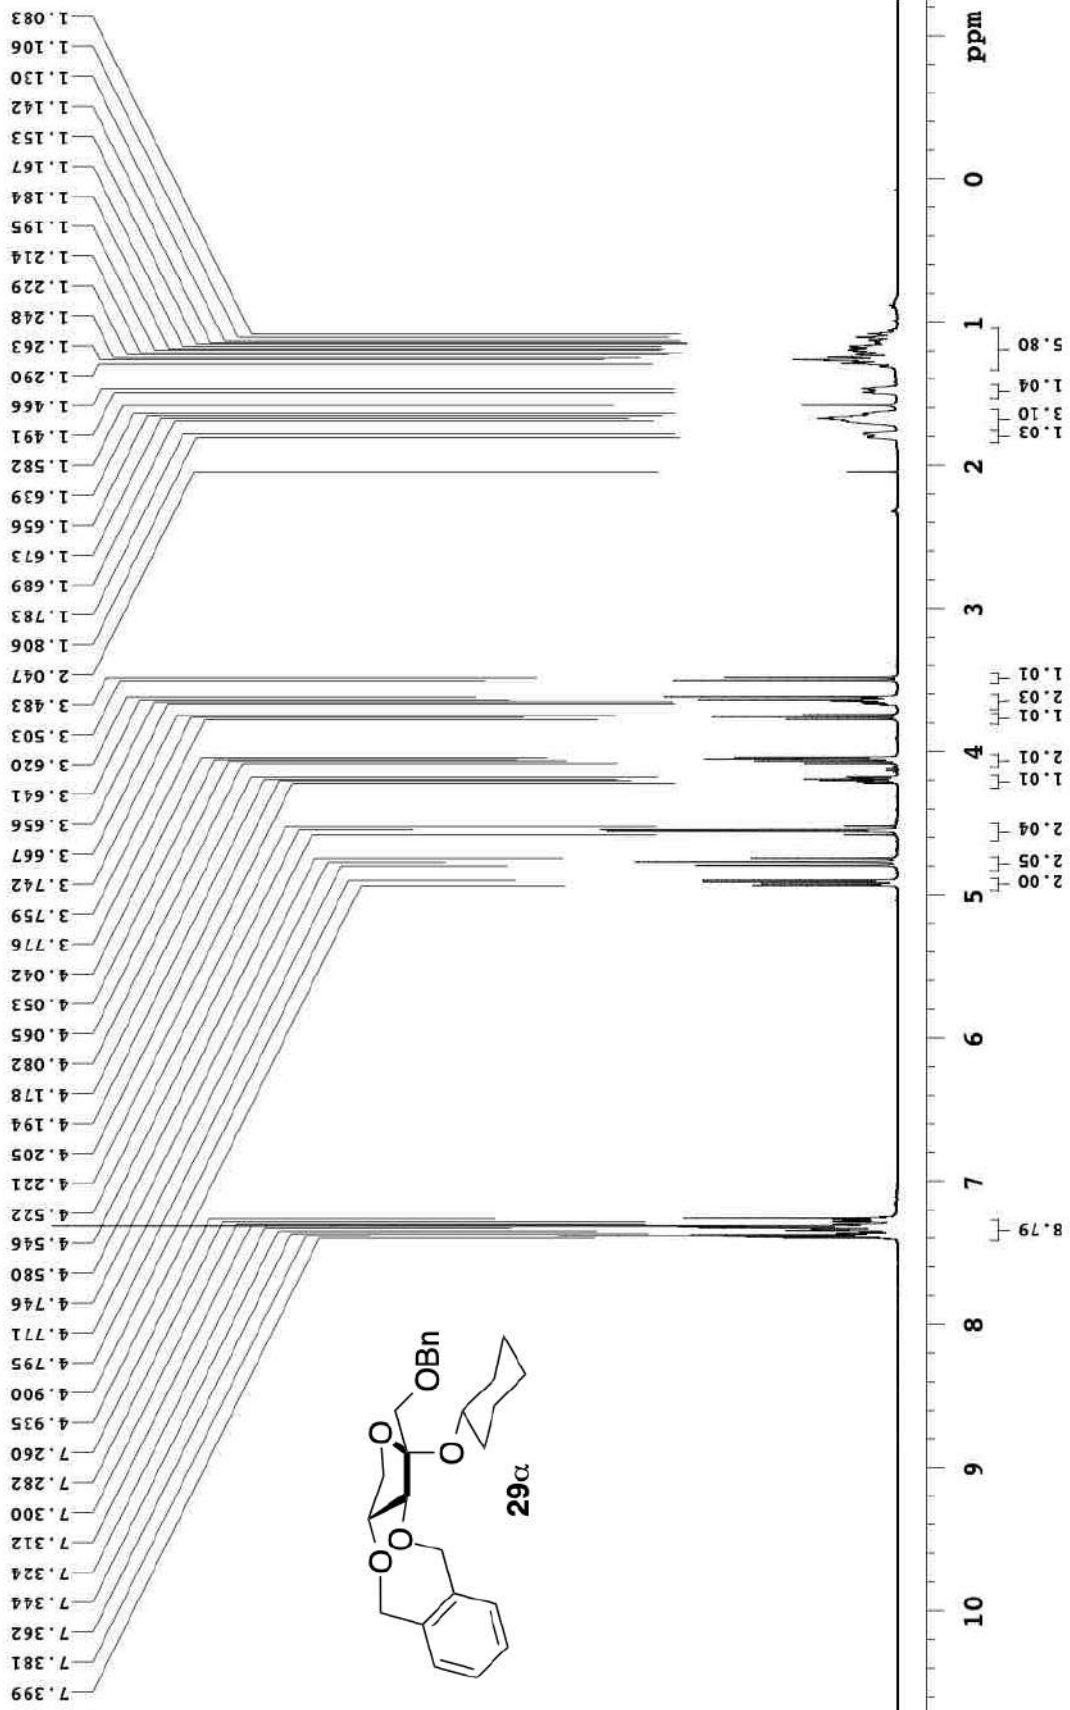





Bo-Shun, Ball-XYL-040-2  
 499.800 MHz H1 PRESAT in cdcl3 (ref. to CDCl3 @ 7.26 ppm), temp 27.7 C -> actual temp = 27.0 C, coldchdual probe

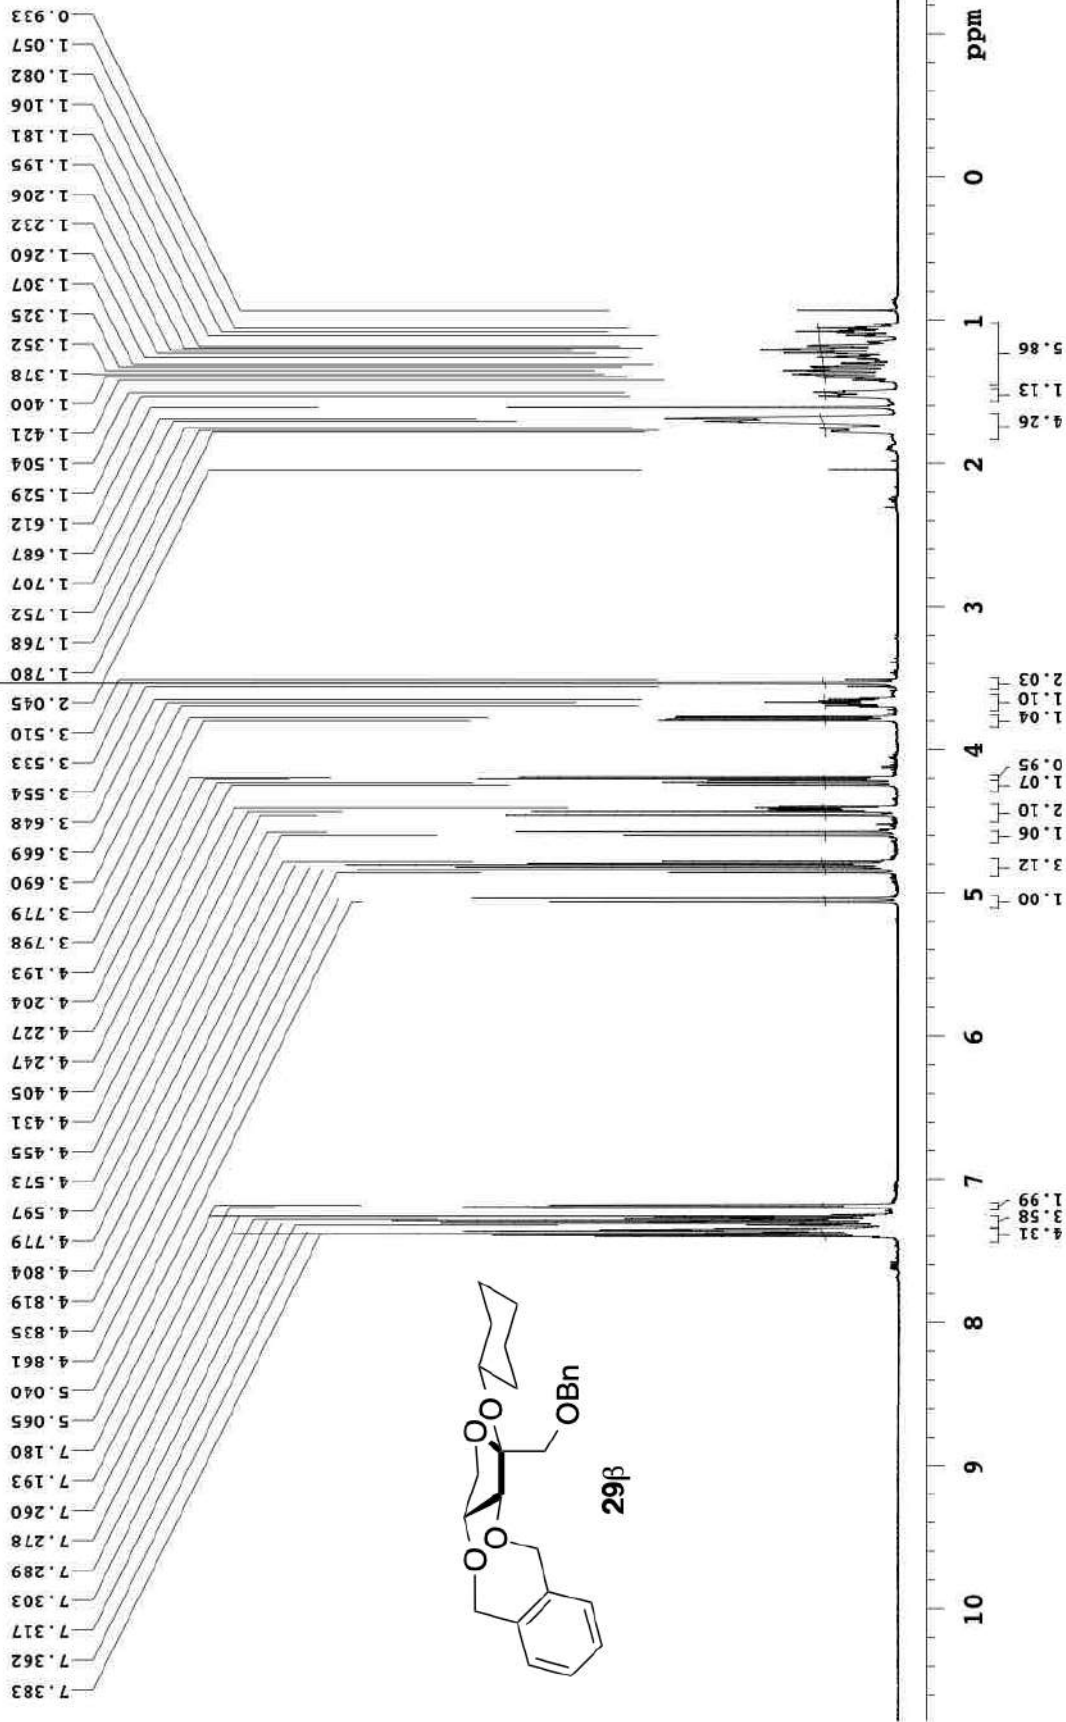



Recorded on: **u500, Jan 23 2017** Sweep Width (Hz): **6009.62** Acquisition Time(s): **5** Relaxation Delay(s): **0.1**  
 Pulse Sequence: **PRESAT** Digital Res. (Hz/ppm): **0.09** Hz per mm(Hz/mm): **22.89** Completed Scans: **16**

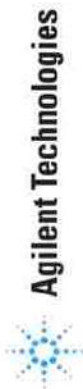

Bo-Shun, Ball-XYL-078-1  
 499.797 MHz H1 1D in cdcl3 (ref. to CDCl3 @ 7.26 ppm)  
 temp 27.7 C -> actual temp = 27.0 C, coldludal probe

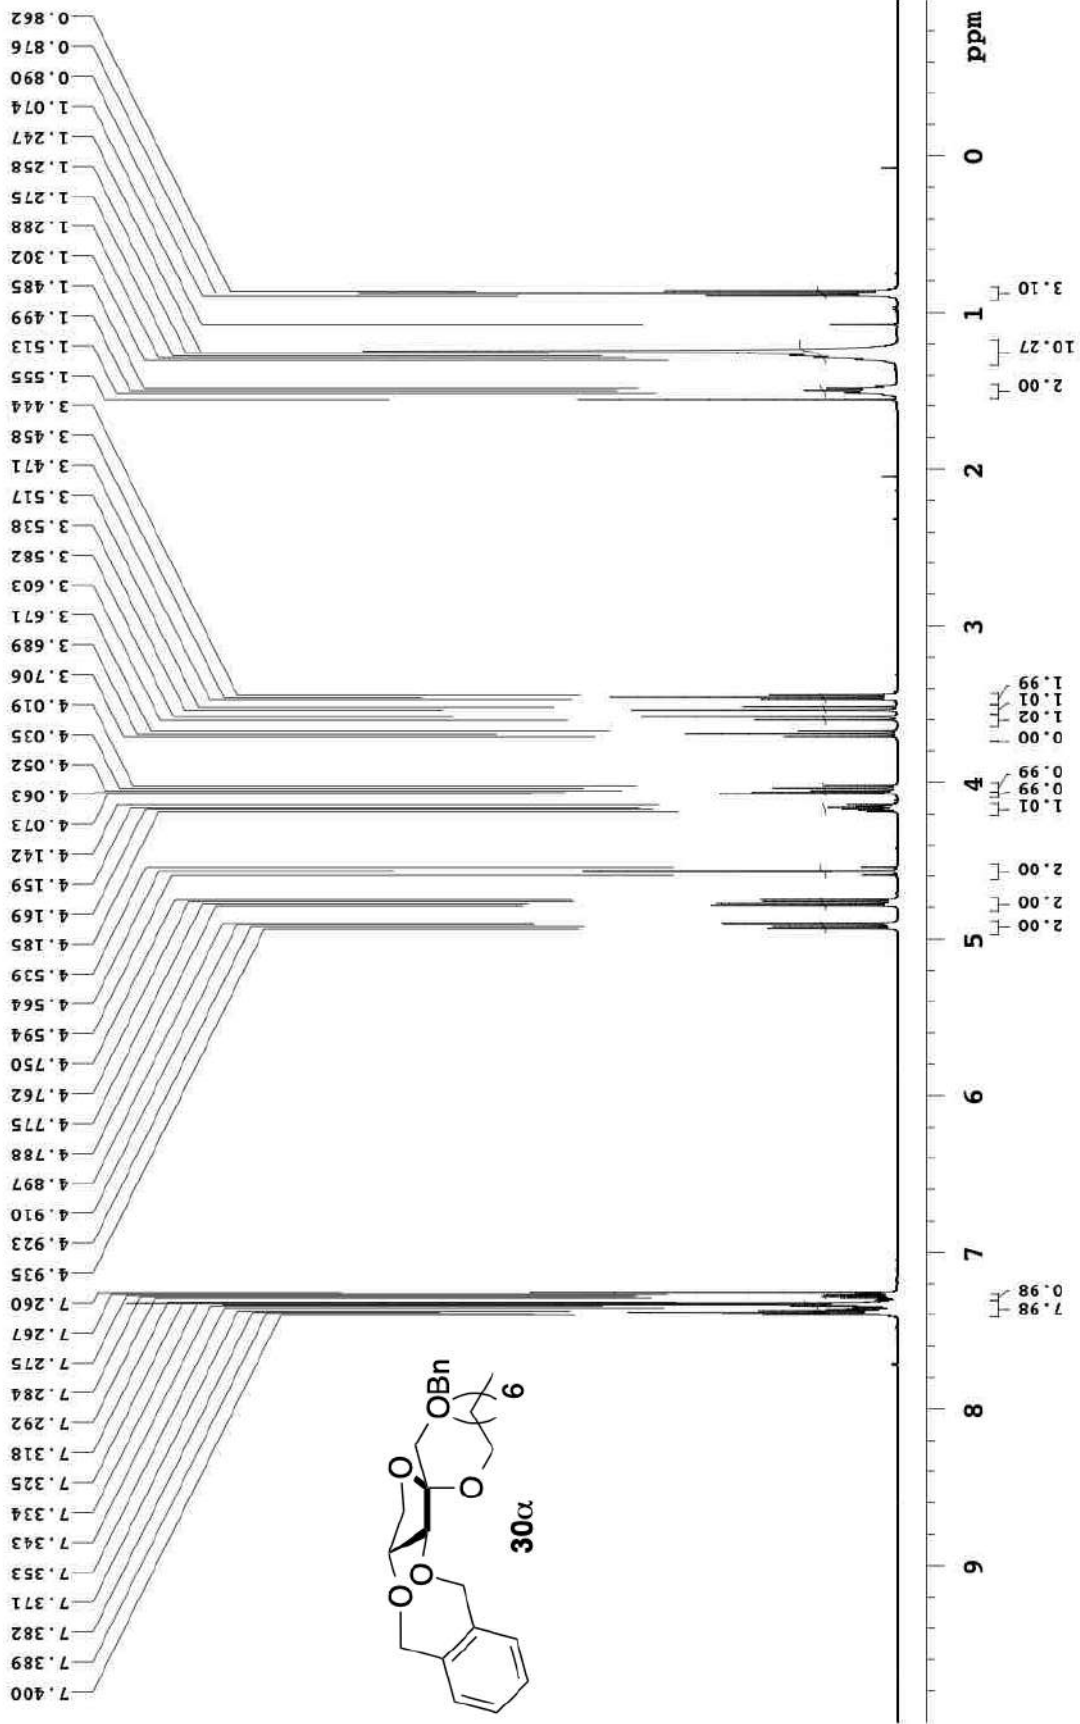



Recorded on: **u500, Jan 23 2017** Sweep Width(Hz): **33783.8** Acquisition Time(s): **1** Relaxation Delay(s): **1**  
Pulse Sequence: **s2pul** Digital Res.(Hz/ppm): **109.99** Hz per mm(Hz/mm): **109.99** Completed Scans: **256**

Bo-Shun, Ball-XYL-078-1  
125.688 MHz C13(H1) 1D in cdcl3 (ref. to CDCl3 @ 77.06 ppm)  
temp 27.7 C -> actual temp = 27.0 C, coldlial probe

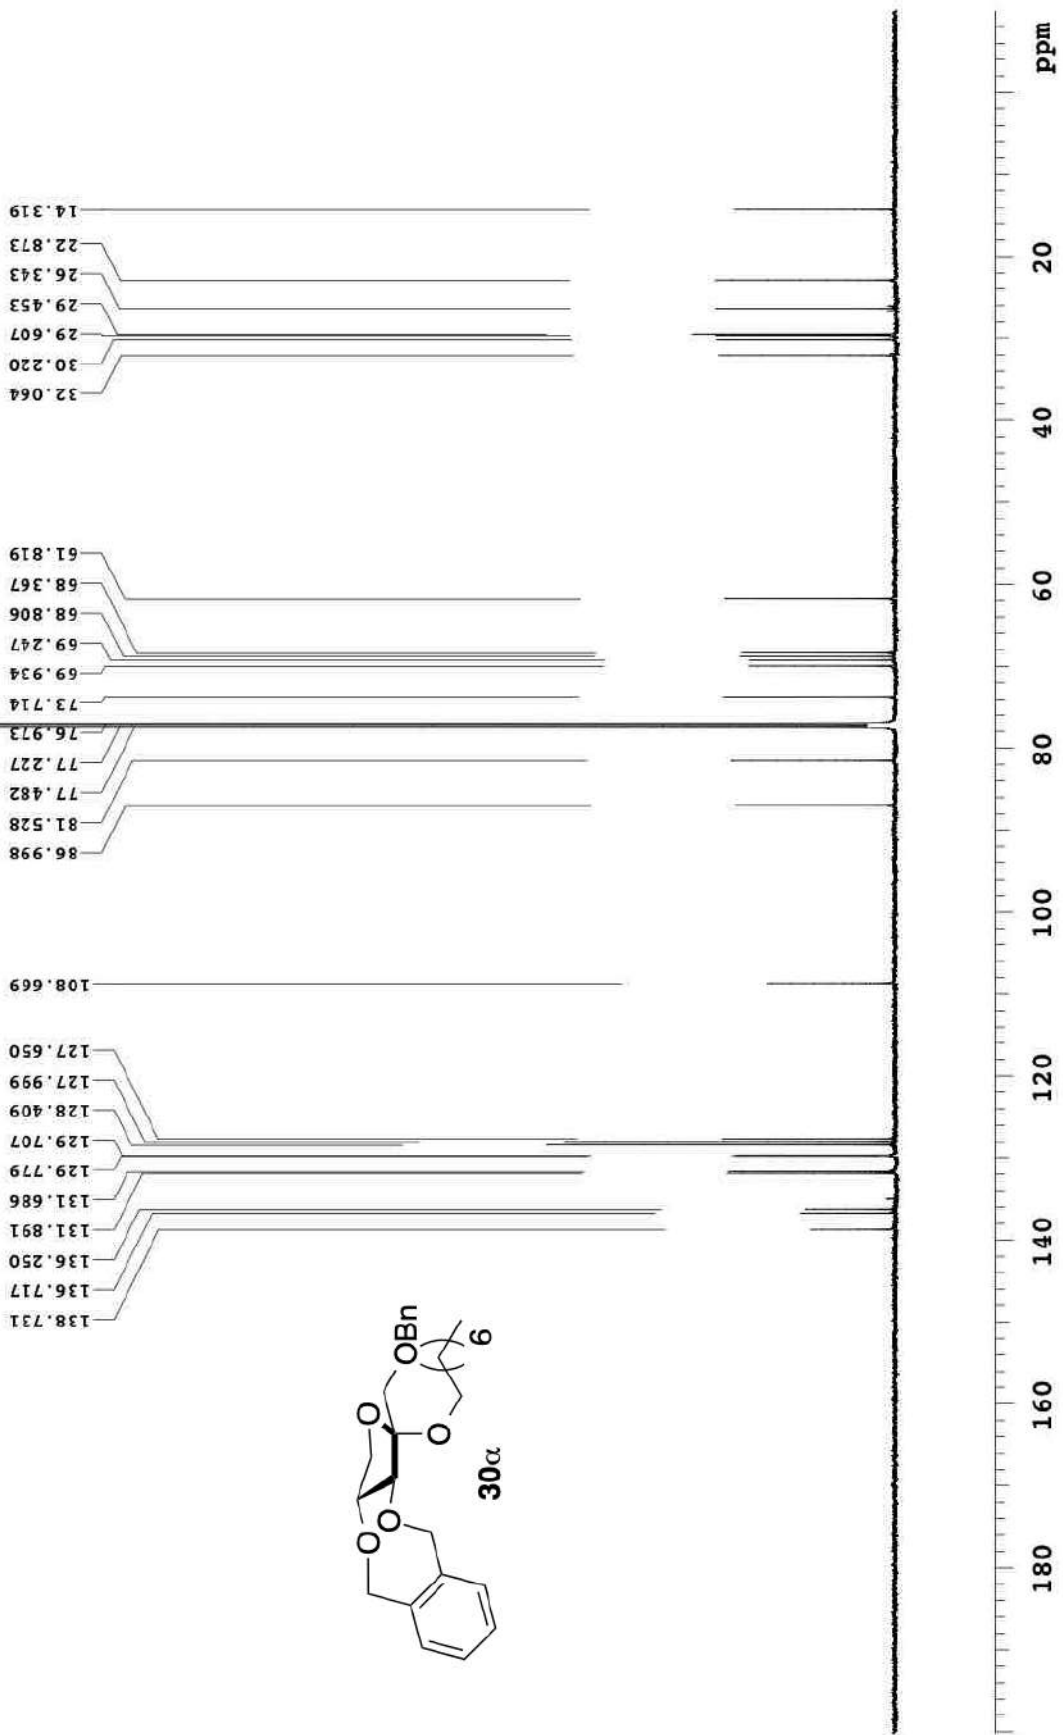



Recorded on: **u500, Jan 25 2017**      Sweep Width (Hz): **6009.62**      Acquisition Time(s): **5**      Relaxation Delay(s): **0.1**  
 Pulse Sequence: **PRESAT**      Digital Res. (Hz/ppm): **0.09**      Hz per mm(Hz/mm): **22.92**      Completed Scans: **16**

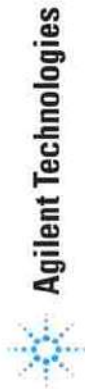

Bo-Shun, Ball-XYL-078-2  
 499.797 MHz H1 1D in cdcl3 (ref. to CDCl3 @ 7.26 ppm)  
 temp 27.7 C -> actual temp = 27.0 C, cold/dual probe

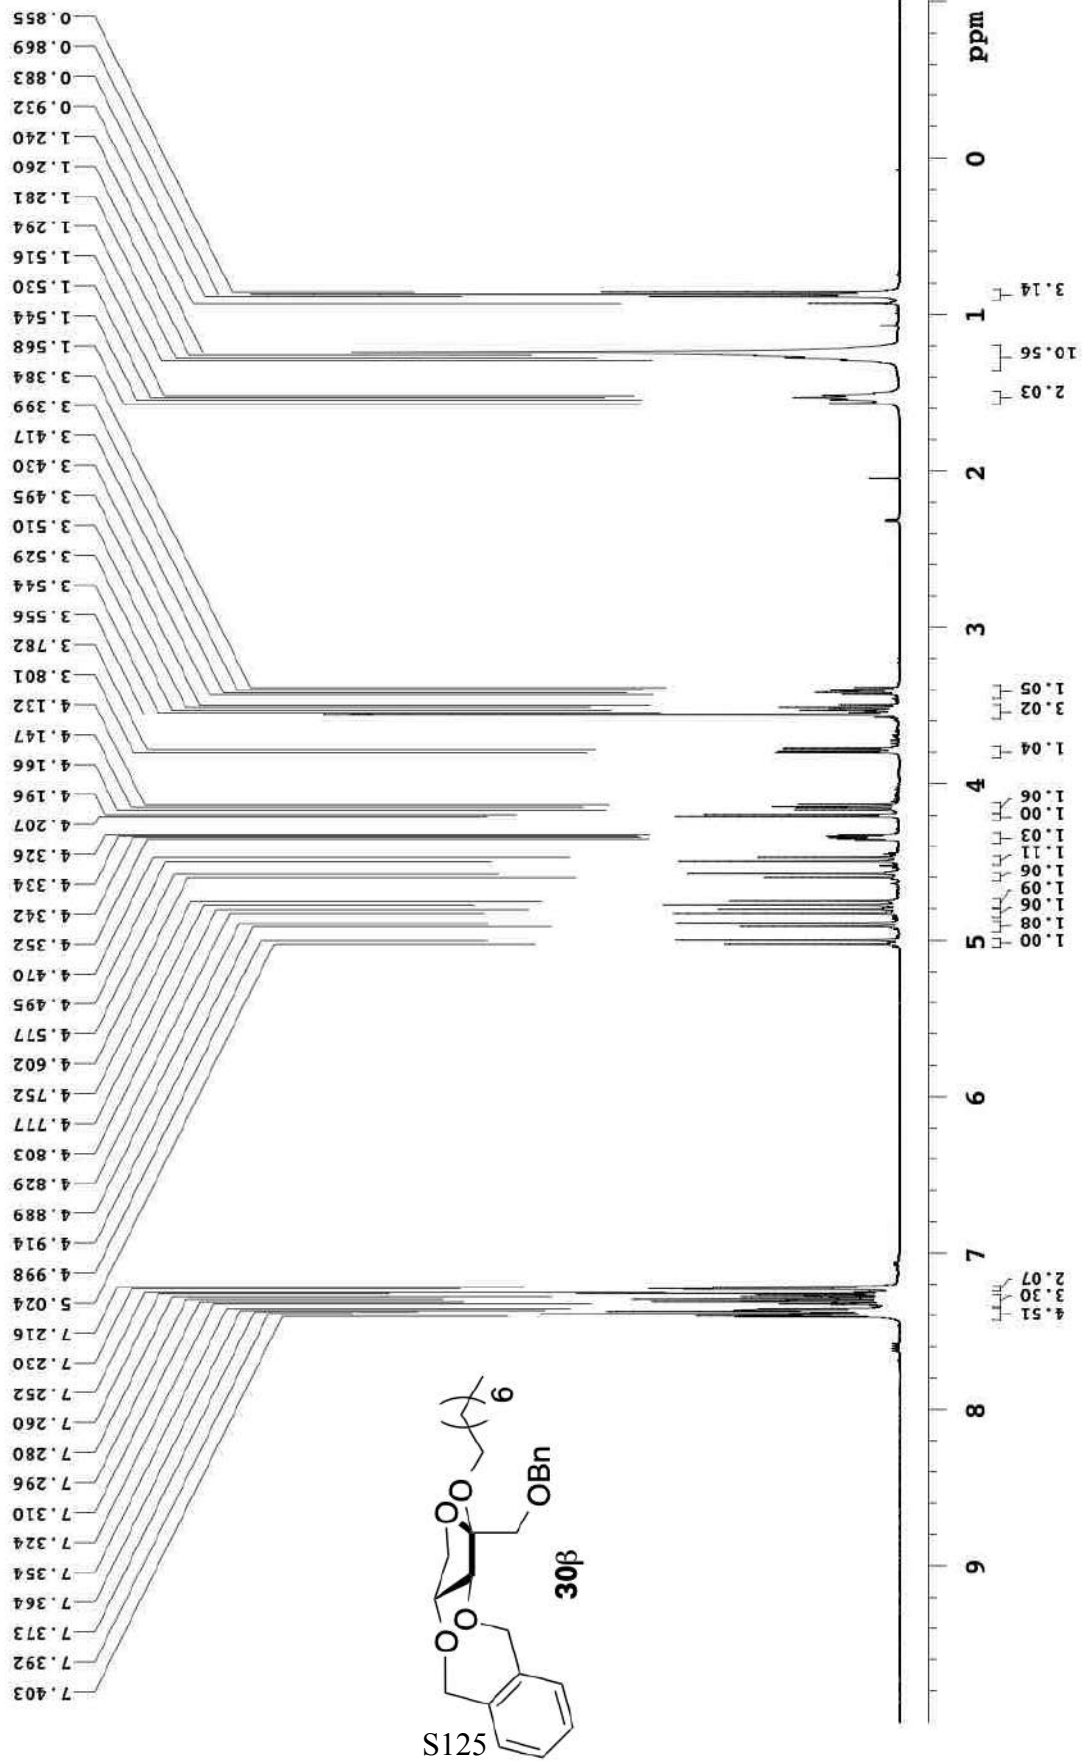

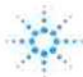

Recorded on: **u500, Jan 25 2017**    Sweep Width (Hz): **33783.8**    Acquisition Time(s): **1**    Relaxation Delay(s): **1**  
Pulse Sequence: **s2pul**    Digital Res. (Hz/ppm): **0.26**    Hz per mm (Hz/mm): **109.81**    Completed Scans: **128**

Bo-Shun, Ball-XYL-078-2  
125.688 MHz C13(H1) 1D in cdcl3 (ref. to CDCl3 @ 77.06 ppm)  
temp 27.7 C -> actual temp = 27.0 C, coldlial probe

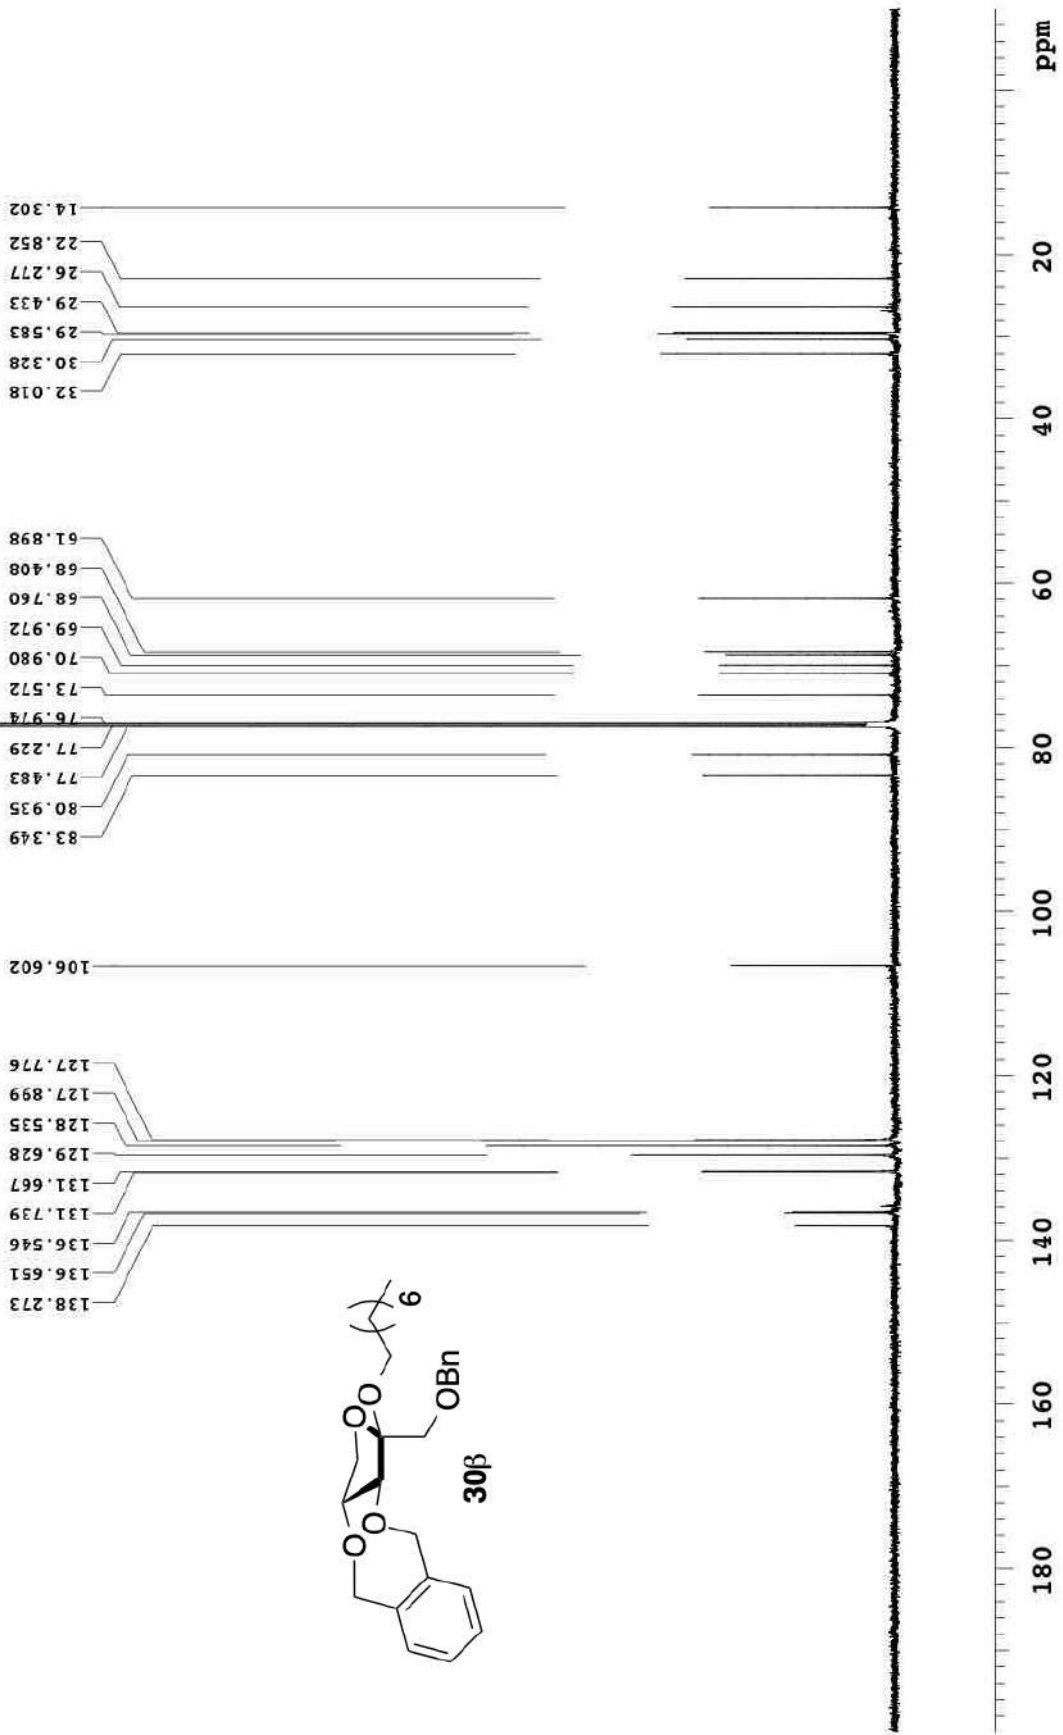

Recorded on: **u500, Jan 31 2017** Sweep Width(Hz): **6009.62** Acquisition Time(s): **5** Relaxation Delay(s): **0.1**  
 Pulse Sequence: **PRESAT** Digital Res.(Hz/ppm): **0.09** Hz per mm(Hz/mm): **22.91** Completed Scans: **16**

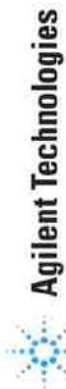

Bo-Shun, Ball-XYL-084-1  
 499.797 MHz H1 1D in cdcl3 (ref. to CDCl3 @ 7.26 ppm)  
 temp 27.7 C -> actual temp = 27.0 C, coldludal probe

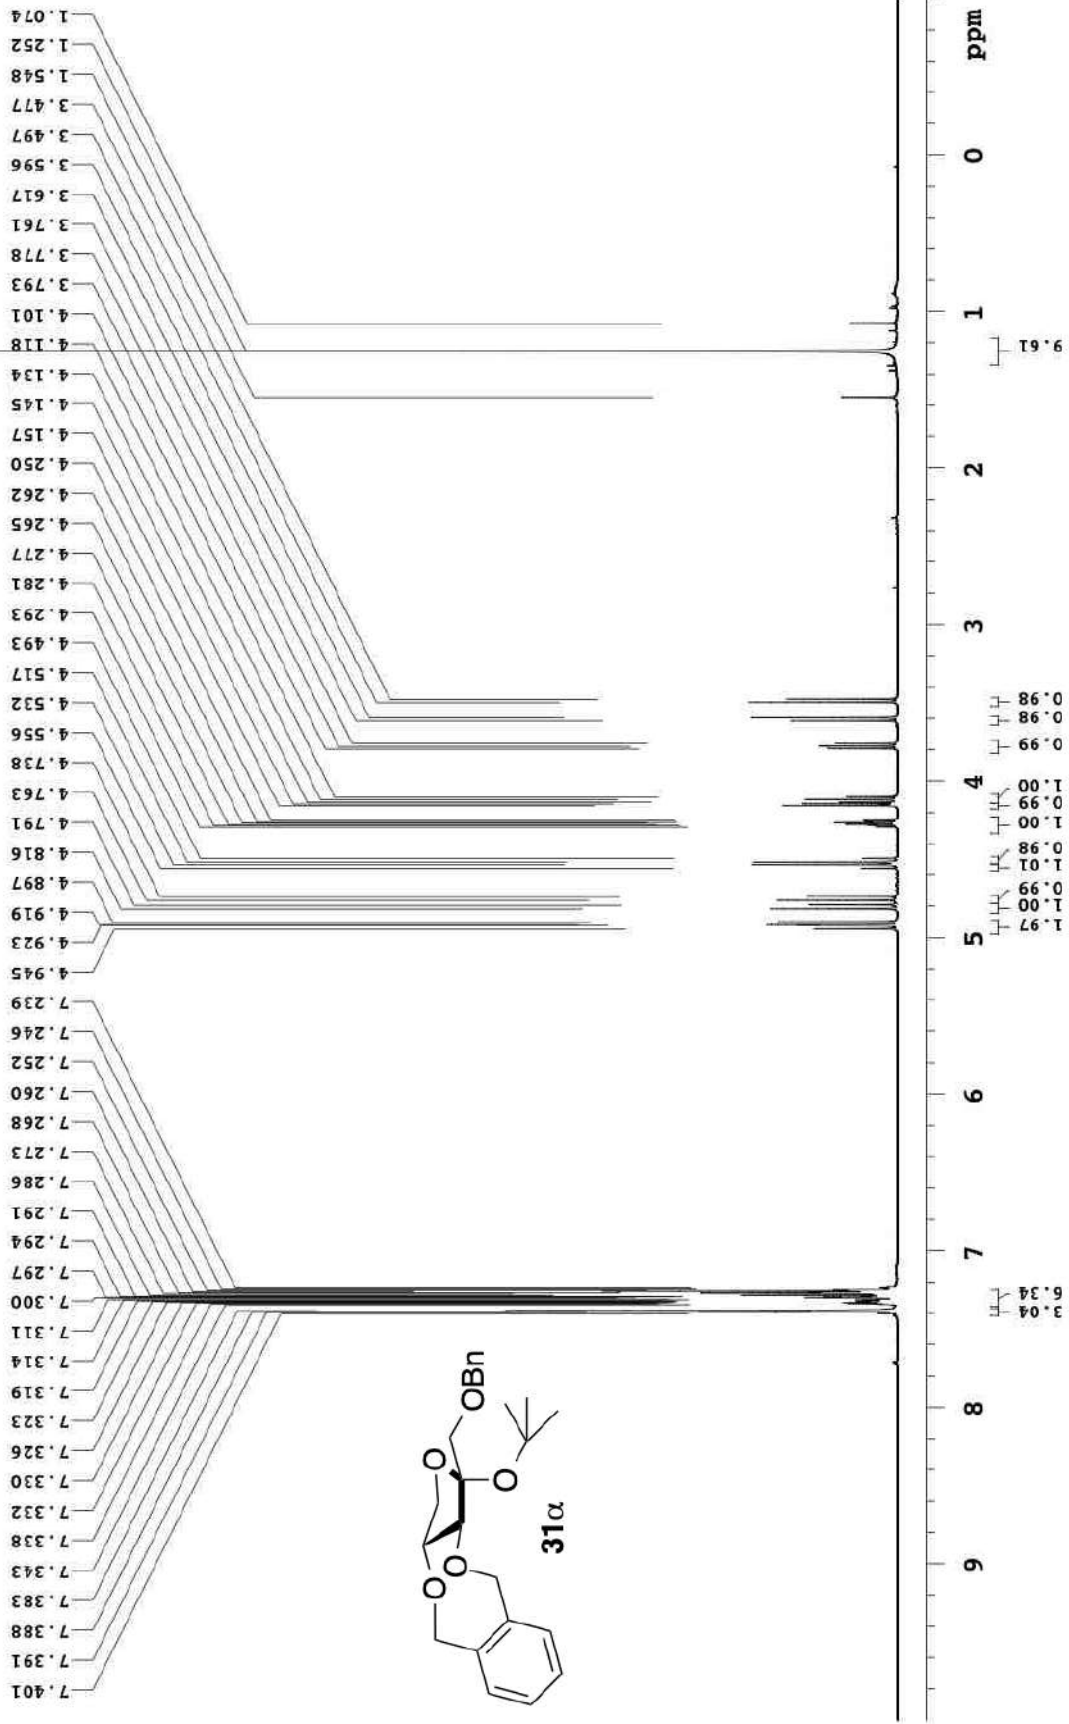

S127



Recorded on: **u500, Jan 31 2017**    Sweep Width(Hz): **33783.8**    Acquisition Time(s): **1**    Relaxation Delay(s): **1**  
Pulse Sequence: **s2pul**    Digital Res.(Hz/mm): **109.9**    Hz per mm(Hz/mm): **109.9**    Completed Scans: **128**

Bo-Shun, Ball-XYL-084-1  
125.688 MHz C13(H1) 1D in cdcl3 (ref. to CDC13 @ 77.06 ppm)  
temp 27.7 C -> actual temp = 27.0 C, cold/dial probe

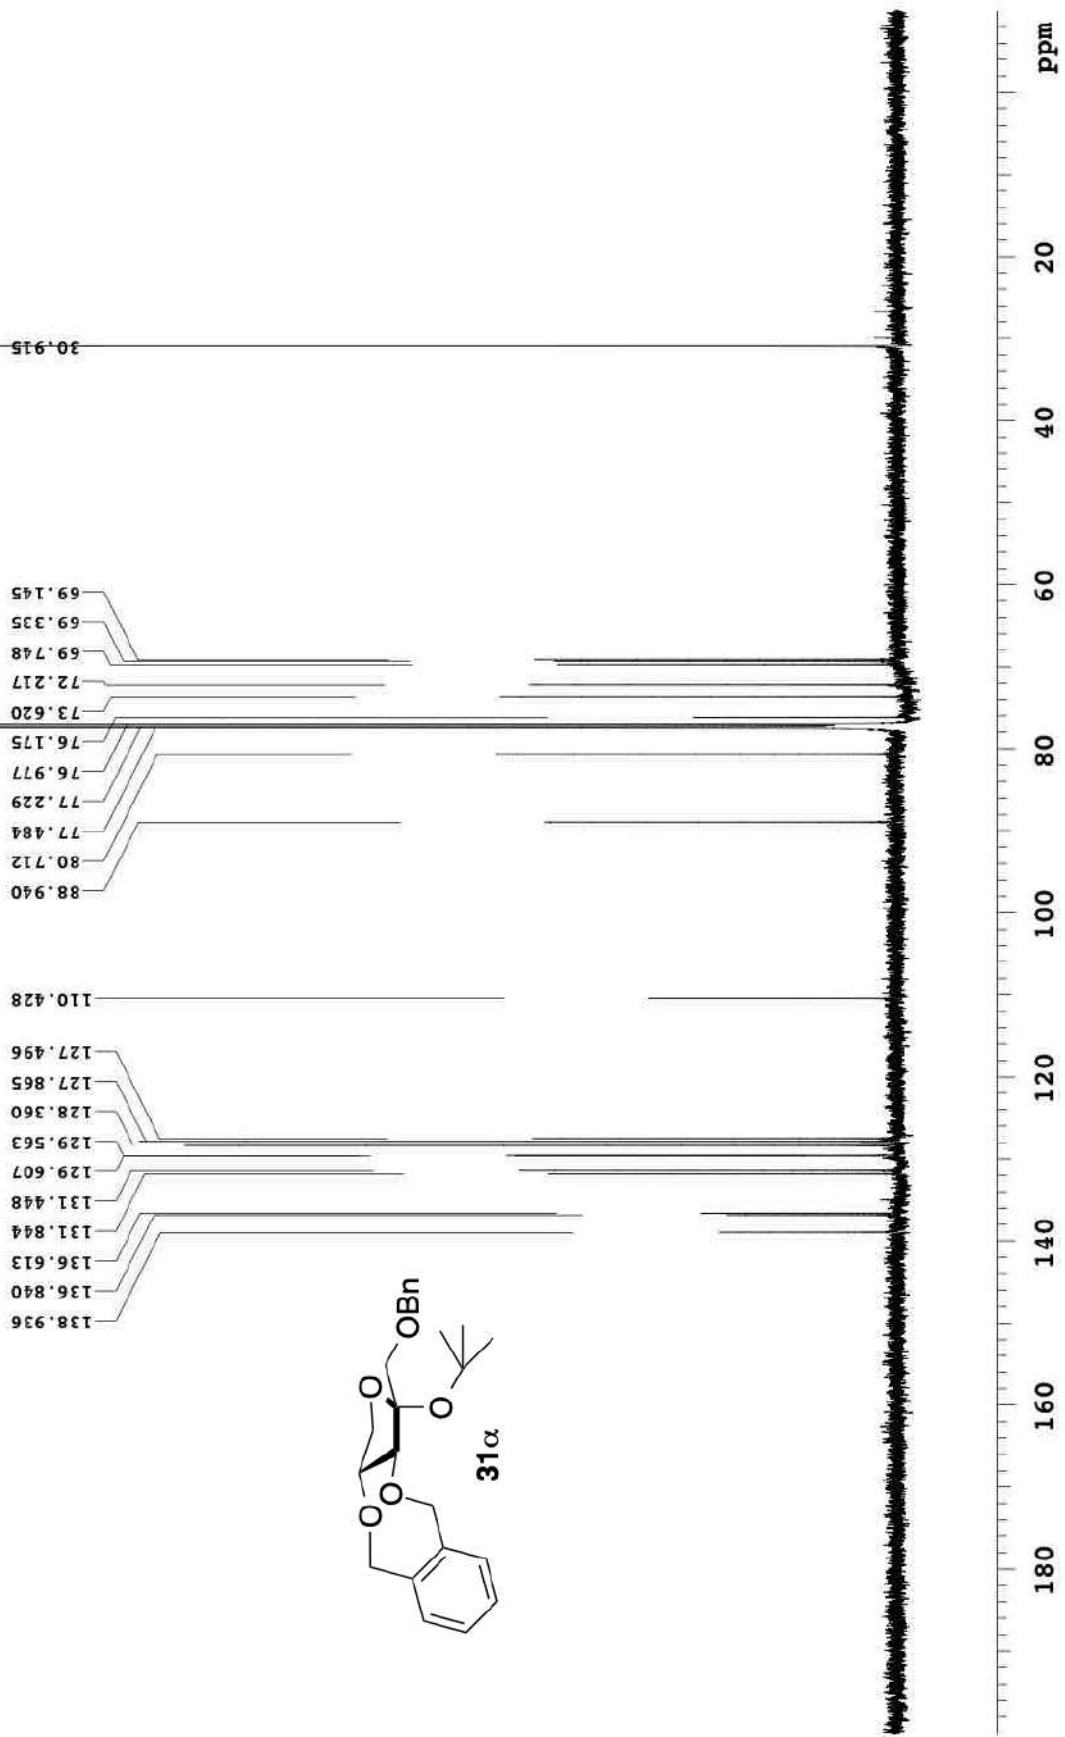





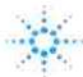

# Agilent Technologies

Bo-Shun, Ball-XYL-084-2  
125.688 MHz C13(H1) 1D in cdcl3 (ref. to CDCl3 @ 77.06 ppm)  
temp 27.7 C -> actual temp = 27.0 C, coldlial probe

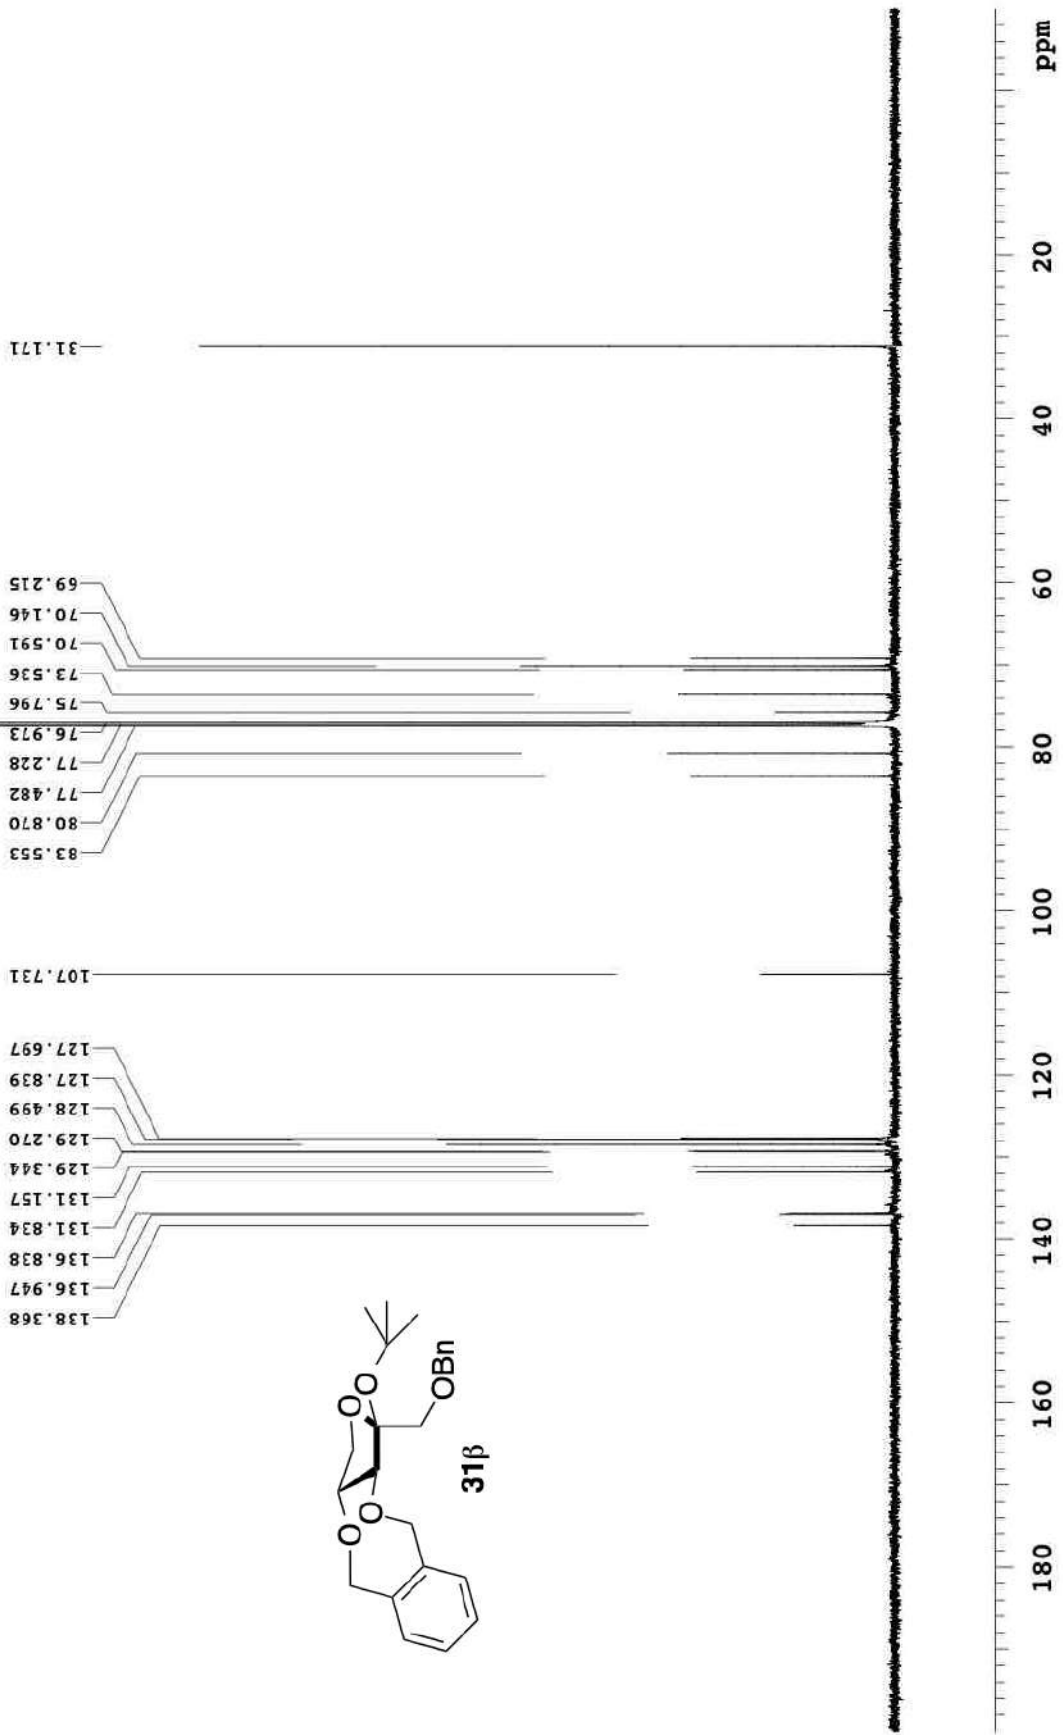

Bo-Shun, Ball-XYL-079-1  
 499.797 MHz H1 1D in cdcl3 (ref. to CDCl3 @ 7.26 ppm)  
 temp 27.7 C -> actual temp = 27.0 C, coldlidal probe

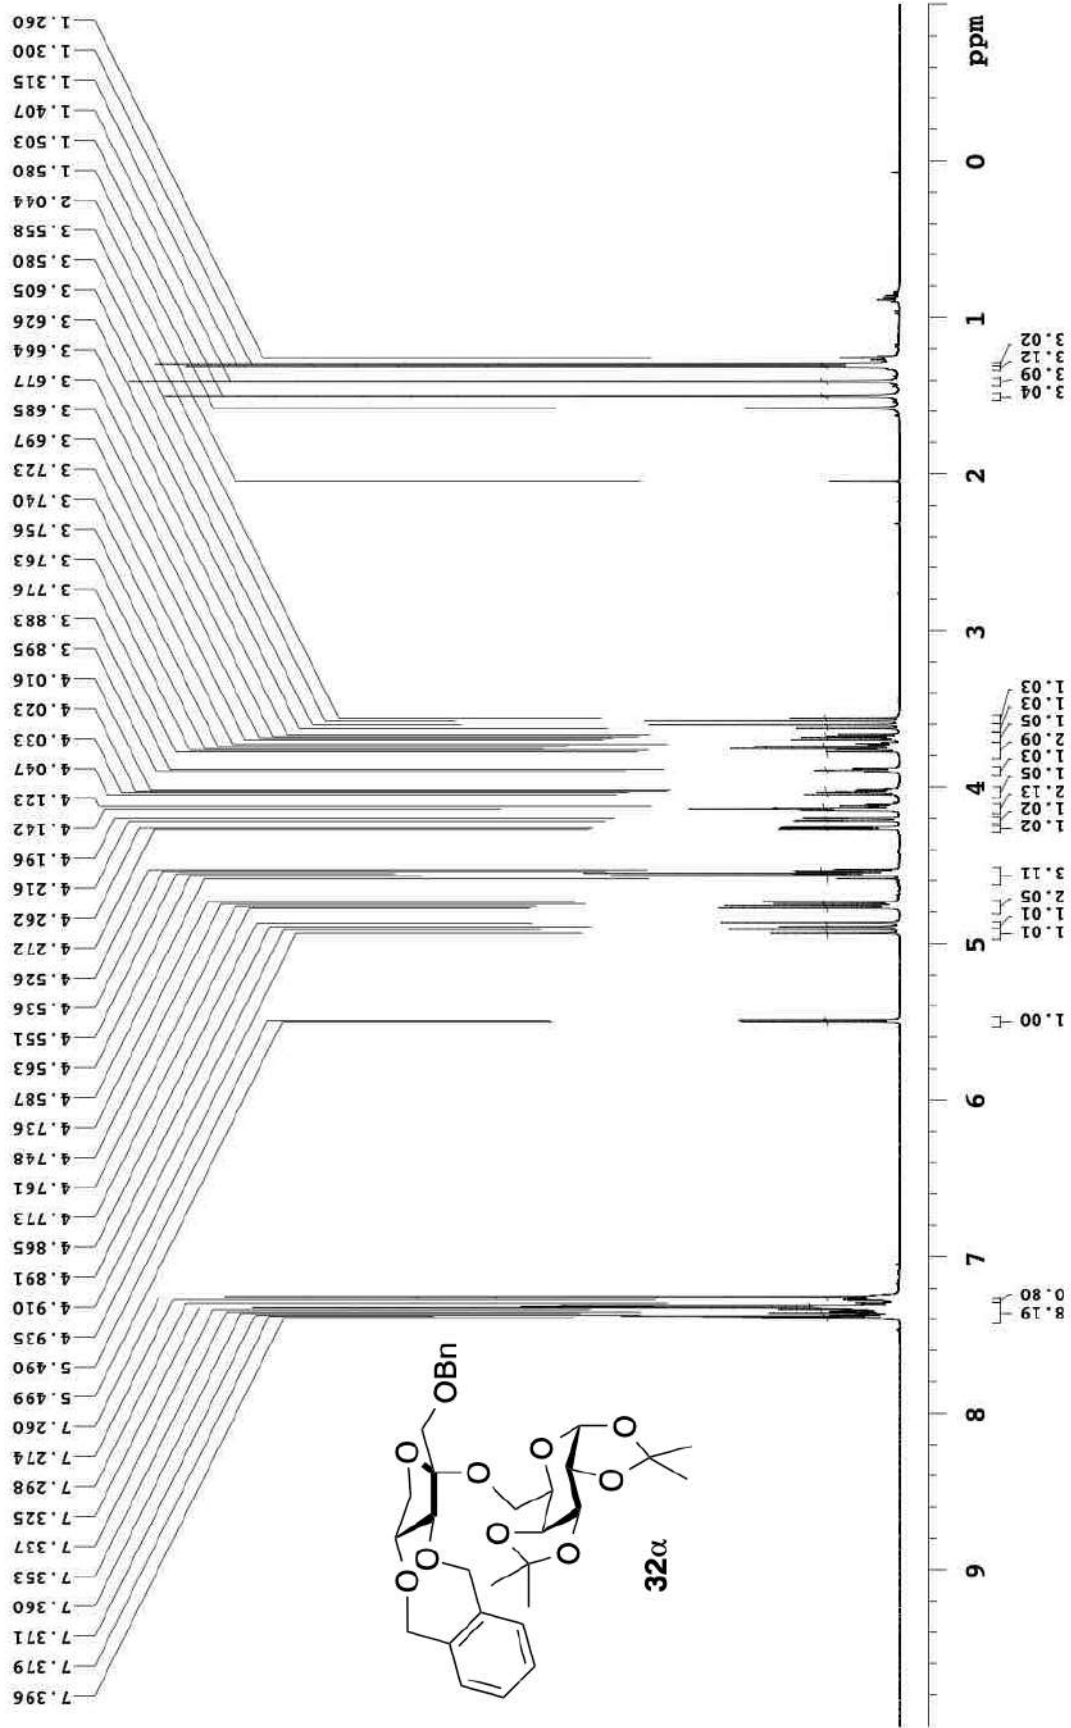

S131

Recorded on: **u500, Jan 23 2017** Sweep Width(Hz): **33783.8** Acquisition Time(s): **1** Relaxation Delay(s): **1**  
 Pulse Sequence: **s2pul** Digital Res.(Hz/ppm): **0.26** Hz per mm(Hz/mm): **109.9** Completed Scans: **512**

Bo-Shun, Ball-XYL-079-1  
 125.688 MHz C13(H1) 1D in cdcl3 (ref. to CDC13 @ 77.06 ppm)  
 temp 27.7 C -> actual temp = 27.0 C, coldlial probe

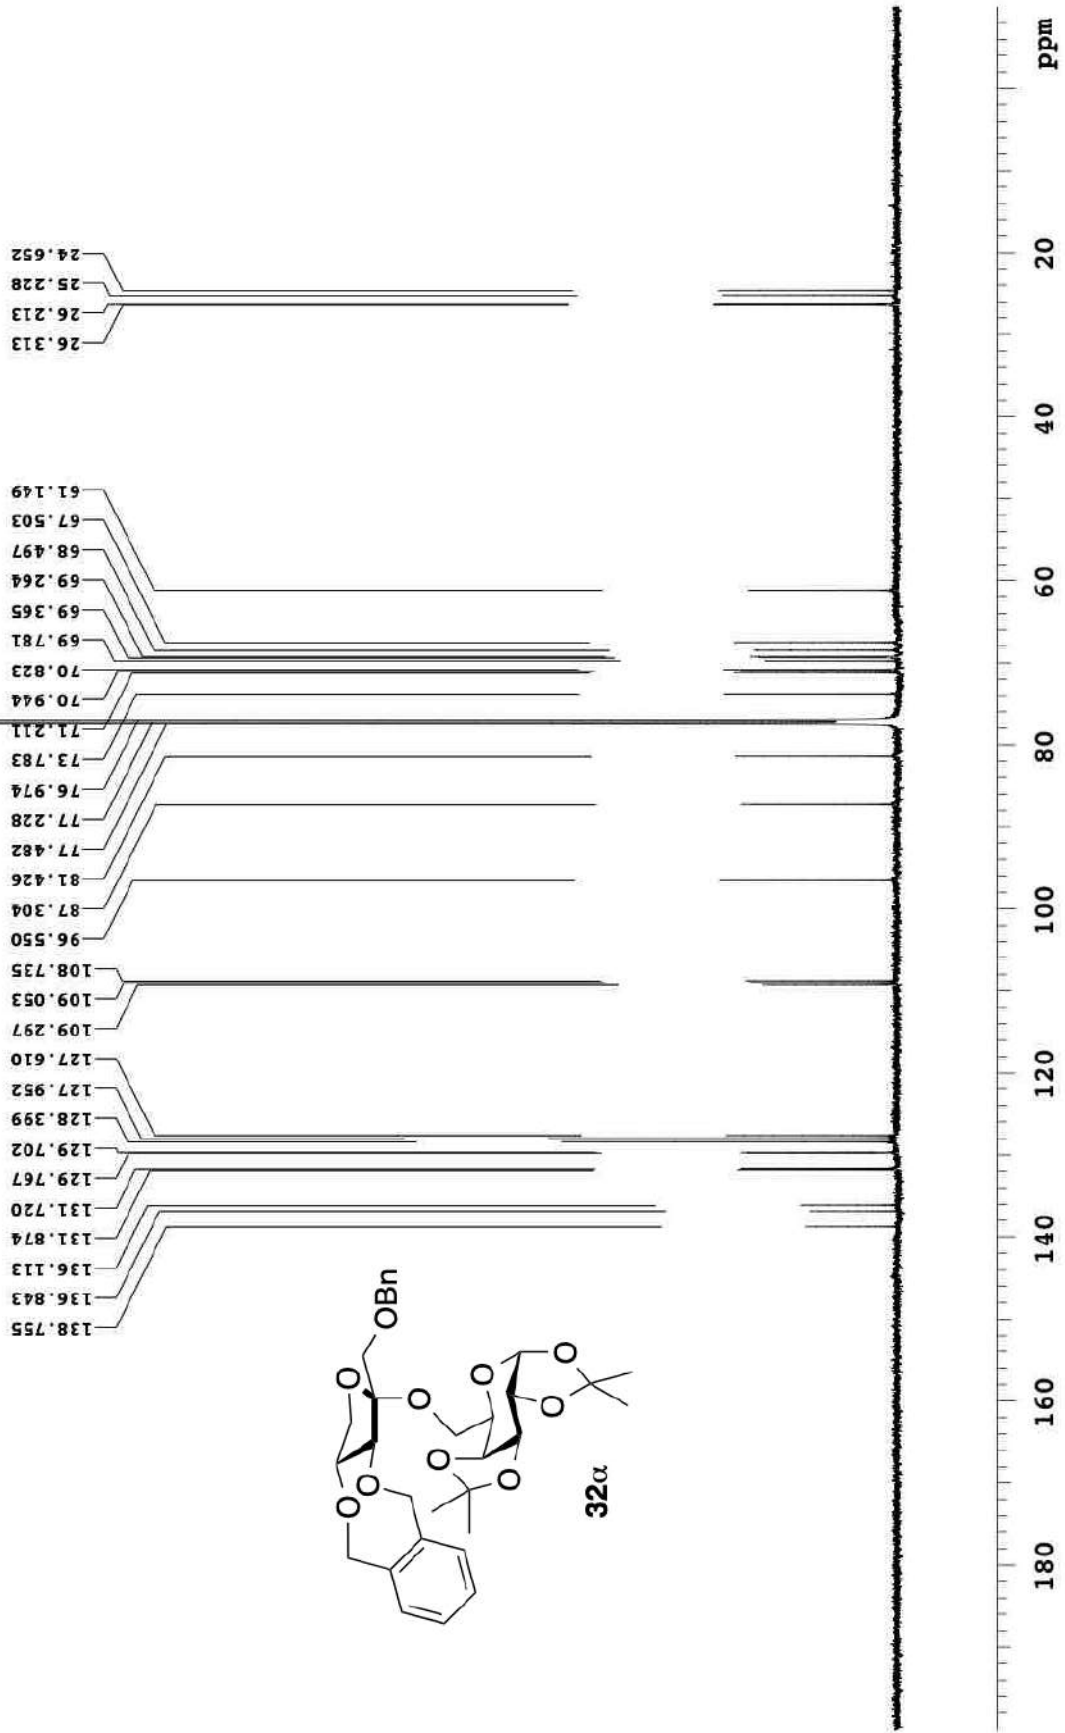



Recorded on: **u500, Jan 24 2017**    Sweep Width(Hz): **6009.62**    Acquisition Time(s): **5**    Relaxation Delay(s): **0.1**  
 Pulse Sequence: **PRESAT**    Digital Res.(Hz/ppm): **0.09**    Hz per mm(Hz/mm): **22.91**    Completed Scans: **16**

Bo-Shun, Ball-XYL-079-2  
 499.797 MHz H1 1D in cdcl3 (ref. to CDCl3 @ 7.26 ppm)  
 temp 27.7 C -> actual temp = 27.0 C, coldludal probe

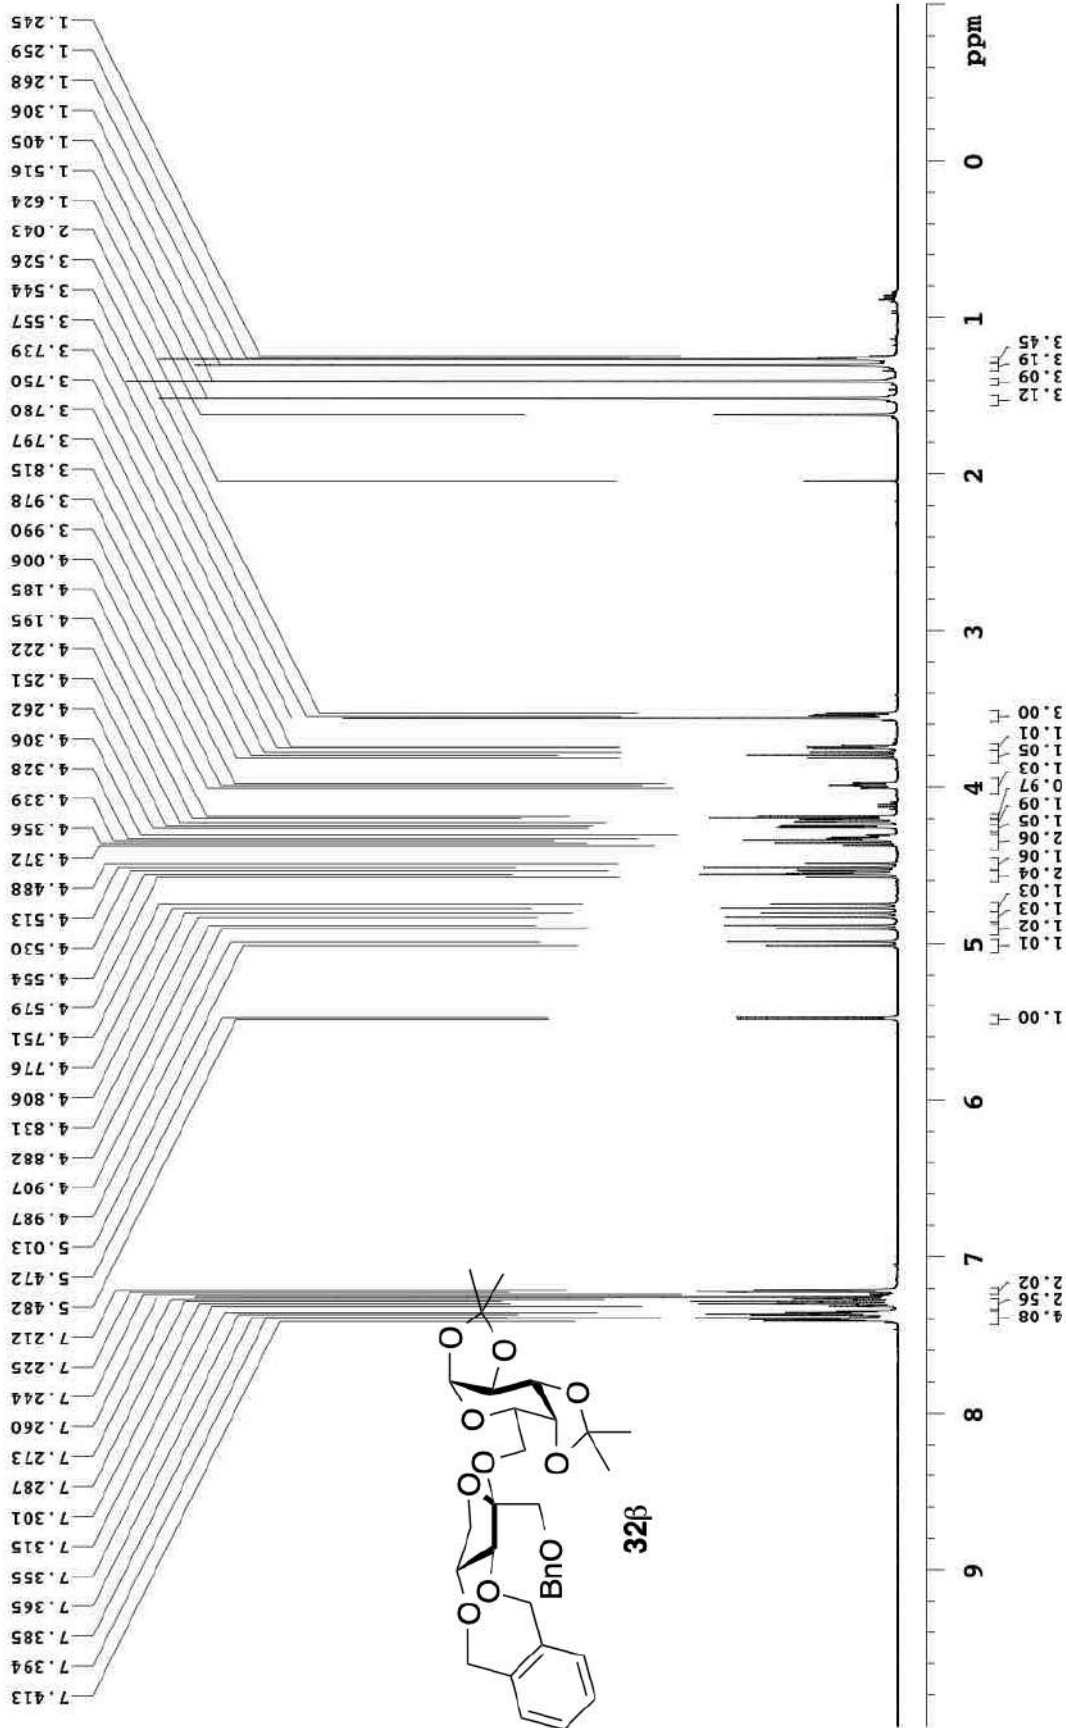

S133



Recorded on: **u500, Jan 24 2017**    Sweep Width(Hz): **33783.8**    Acquisition Time(s): **1**    Relaxation Delay(s): **1**  
Pulse Sequence: **s2pul**    Digital Res.(Hz/ppm): **0.26**    Hz per mm(Hz/mm): **109.9**    Completed Scans: **512**

Bo-Shun, Ball-XYL-079-2  
125.688 MHz C13(H1) 1D in cdcl3 (ref. to CDCl3 @ 77.06 ppm)  
temp 27.7 C -> actual temp = 27.0 C, coldlial probe

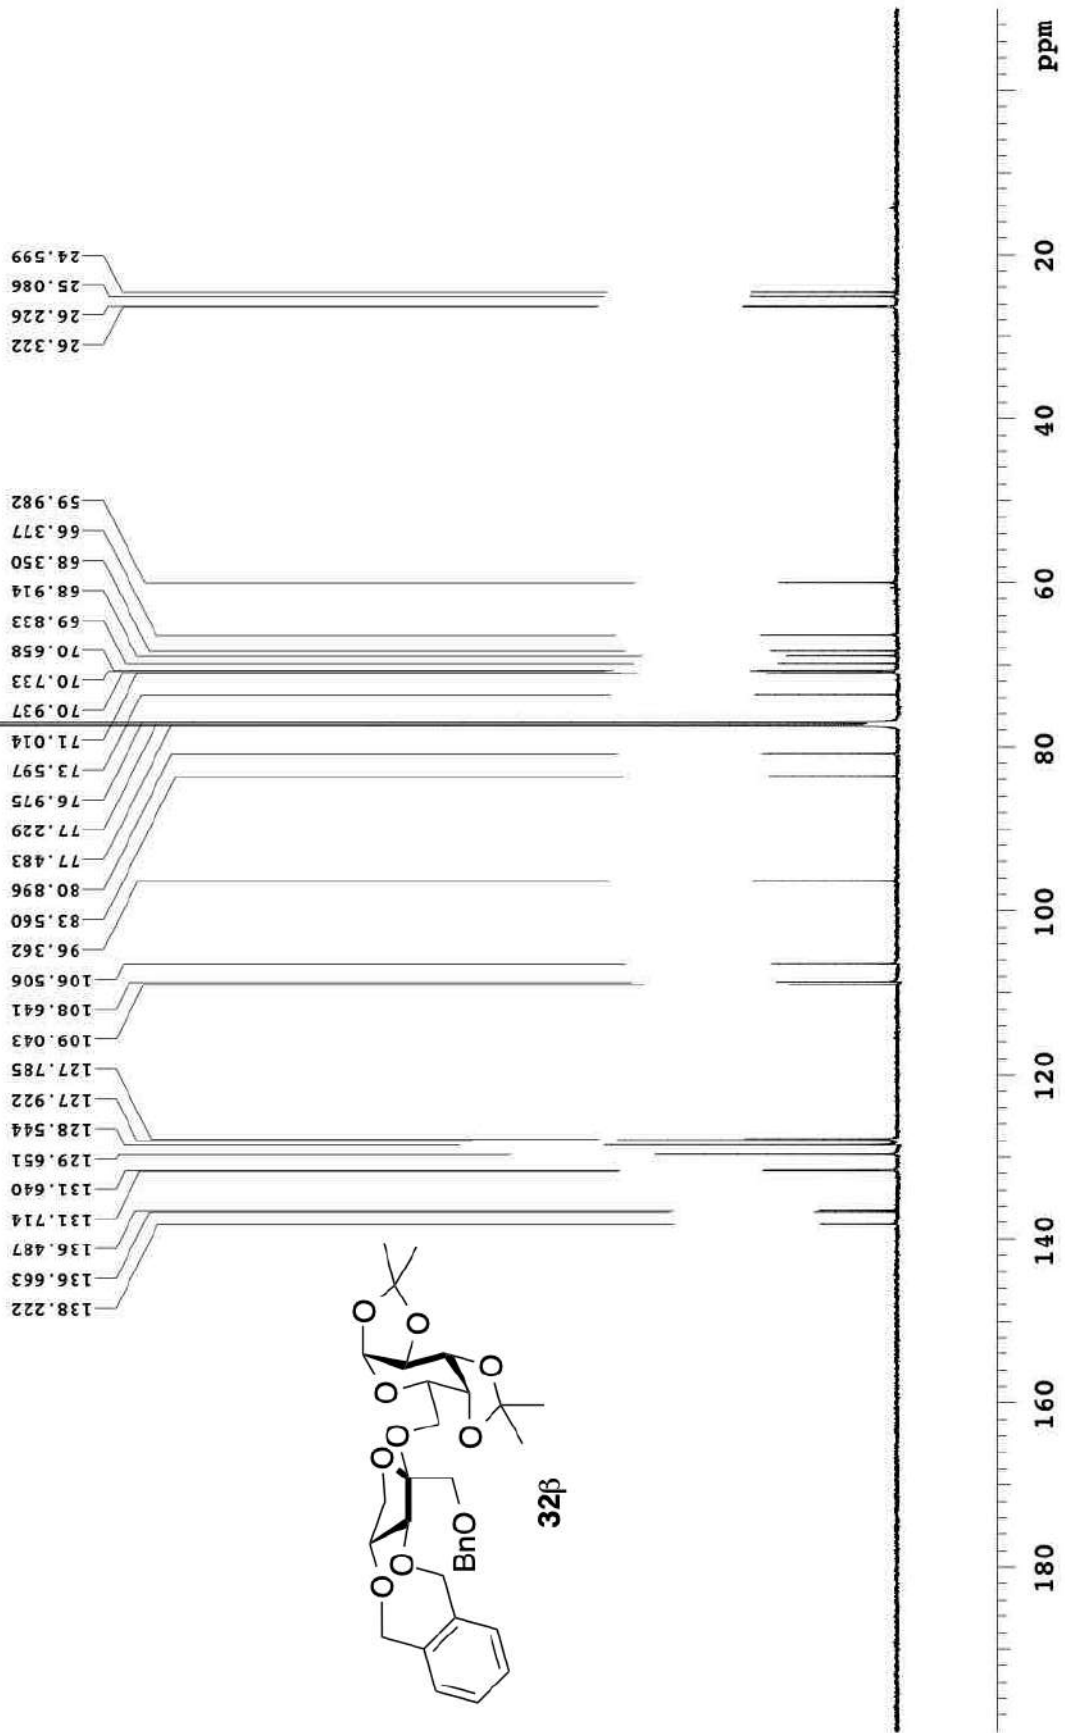



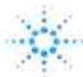

Recorded on: **u500, Jan 26 2017** Sweep Width(Hz): **33783.8** Acquisition Time(s): **1** Relaxation Delay(s): **1**  
Pulse Sequence: **s2pul** Digital Res.(Hz/ppm): **0.26** Hz per mm(Hz/mm): **104.68** Completed Scans: **256**

Bo-Shun, Ball-XYL-080-1  
125.688 MHz C13(H1) 1D in cdcl3 (ref. to CDC13 @ 77.06 ppm)  
temp 27.7 C -> actual temp = 27.0 C, coldlial probe

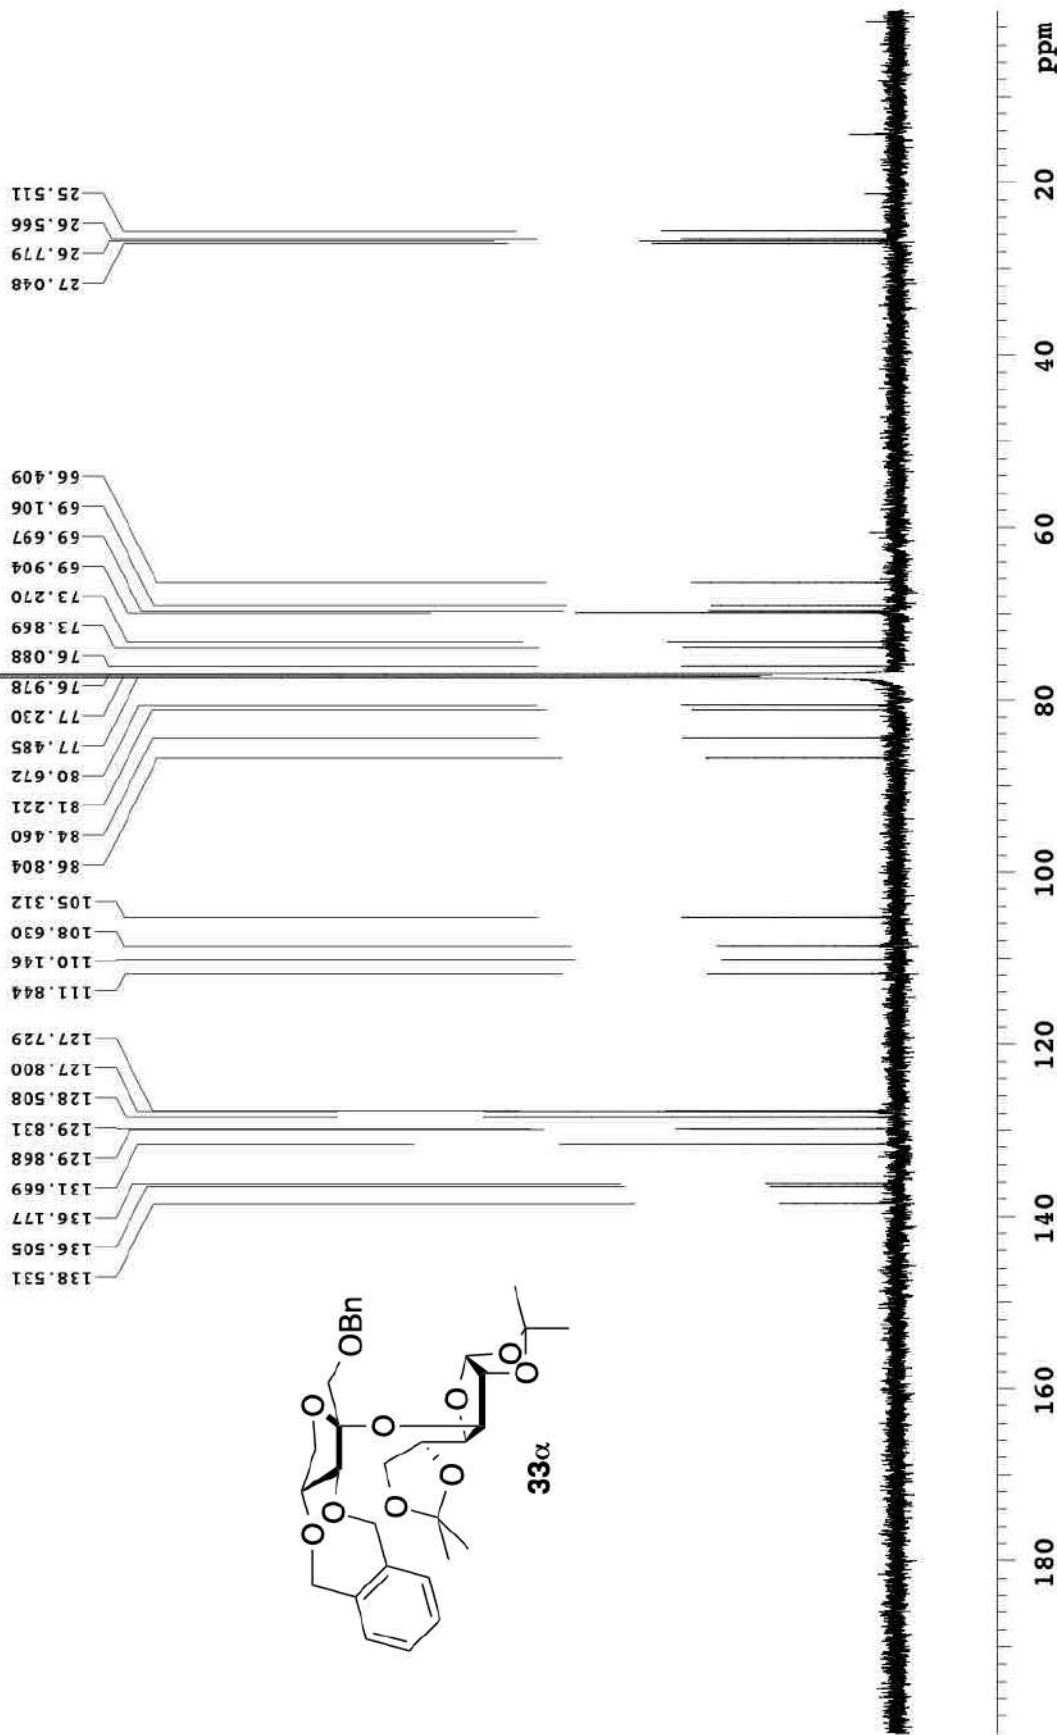



Recorded on: **u500, Jan 27 2017**      Sweep Width (Hz): **6009.62**      Acquisition Time(s): **5**      Relaxation Delay(s): **0.1**  
 Pulse Sequence: **PRESAT**      Digital Res. (Hz/ppm): **0.09**      Hz per mm(Hz/mm): **22.91**      Completed Scans: **16**

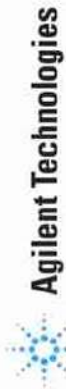

Bo-Shun, Ball-XYL-080-2  
 499.797 MHz H1 1D in cdcl3 (ref. to CDCl3 @ 7.26 ppm)  
 temp 27.7 C -> actual temp = 27.0 C, coldidial probe

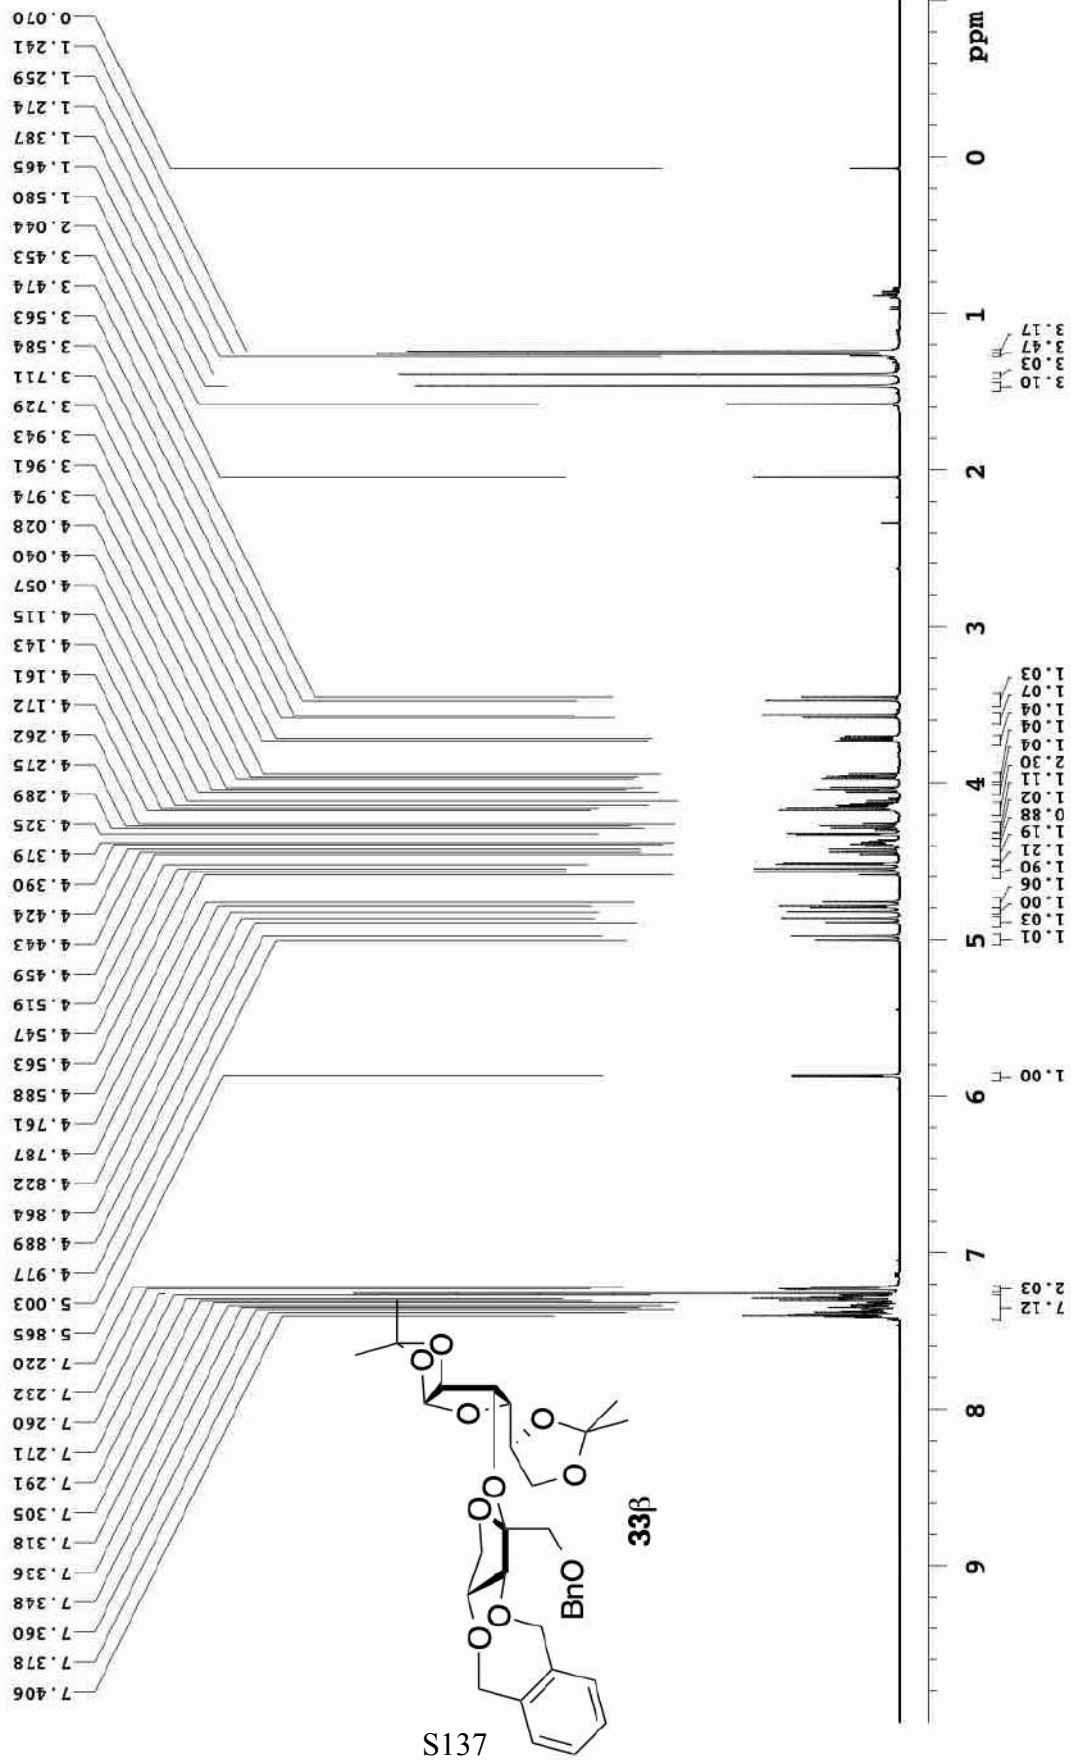

Bo-Shun, Ball-XYL-080-2  
 125.688 MHz C13(H1) 1D in cdcl3 (ref. to CDC13 @ 77.06 ppm)  
 temp 27.7 C -> actual temp = 27.0 C, coldidial probe

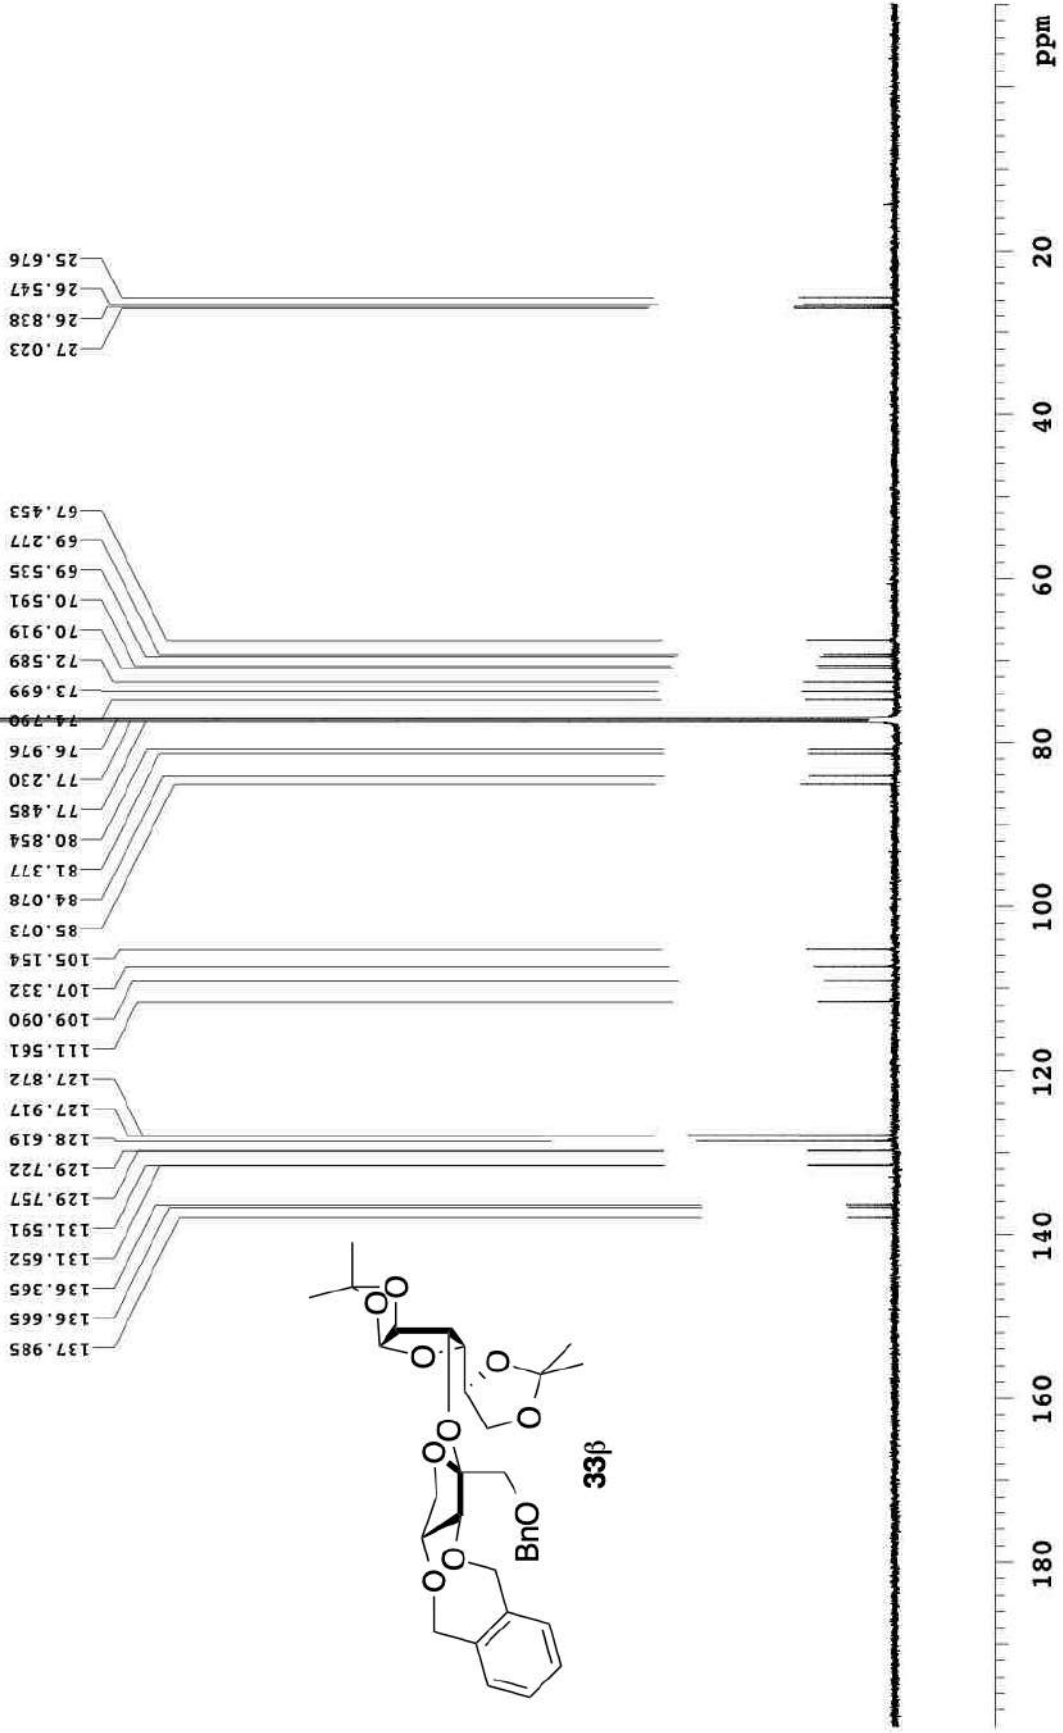

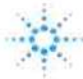

# Agilent Technologies

Department of Chemistry, University of Alberta

Recorded on: v700, Dec 7 2016 Sweep Width(Hz): 8389.26 Acquisition Time(s): 5 Relaxation Delay(s): 0.1  
Pulse Sequence: PRESAT Digital Res.(Hz/ppm): 34.95 Hz per mm(Hz/mm): 34.95 Completed Scans: 16

Bo-Shun, Ball-XYL-067-1  
699.762 MHz H1 1D in cdcl3 (ref. to CDCl3 @ 7.26 ppm)  
temp 27.5 C -> actual temp = 27.0 C, coldid probe

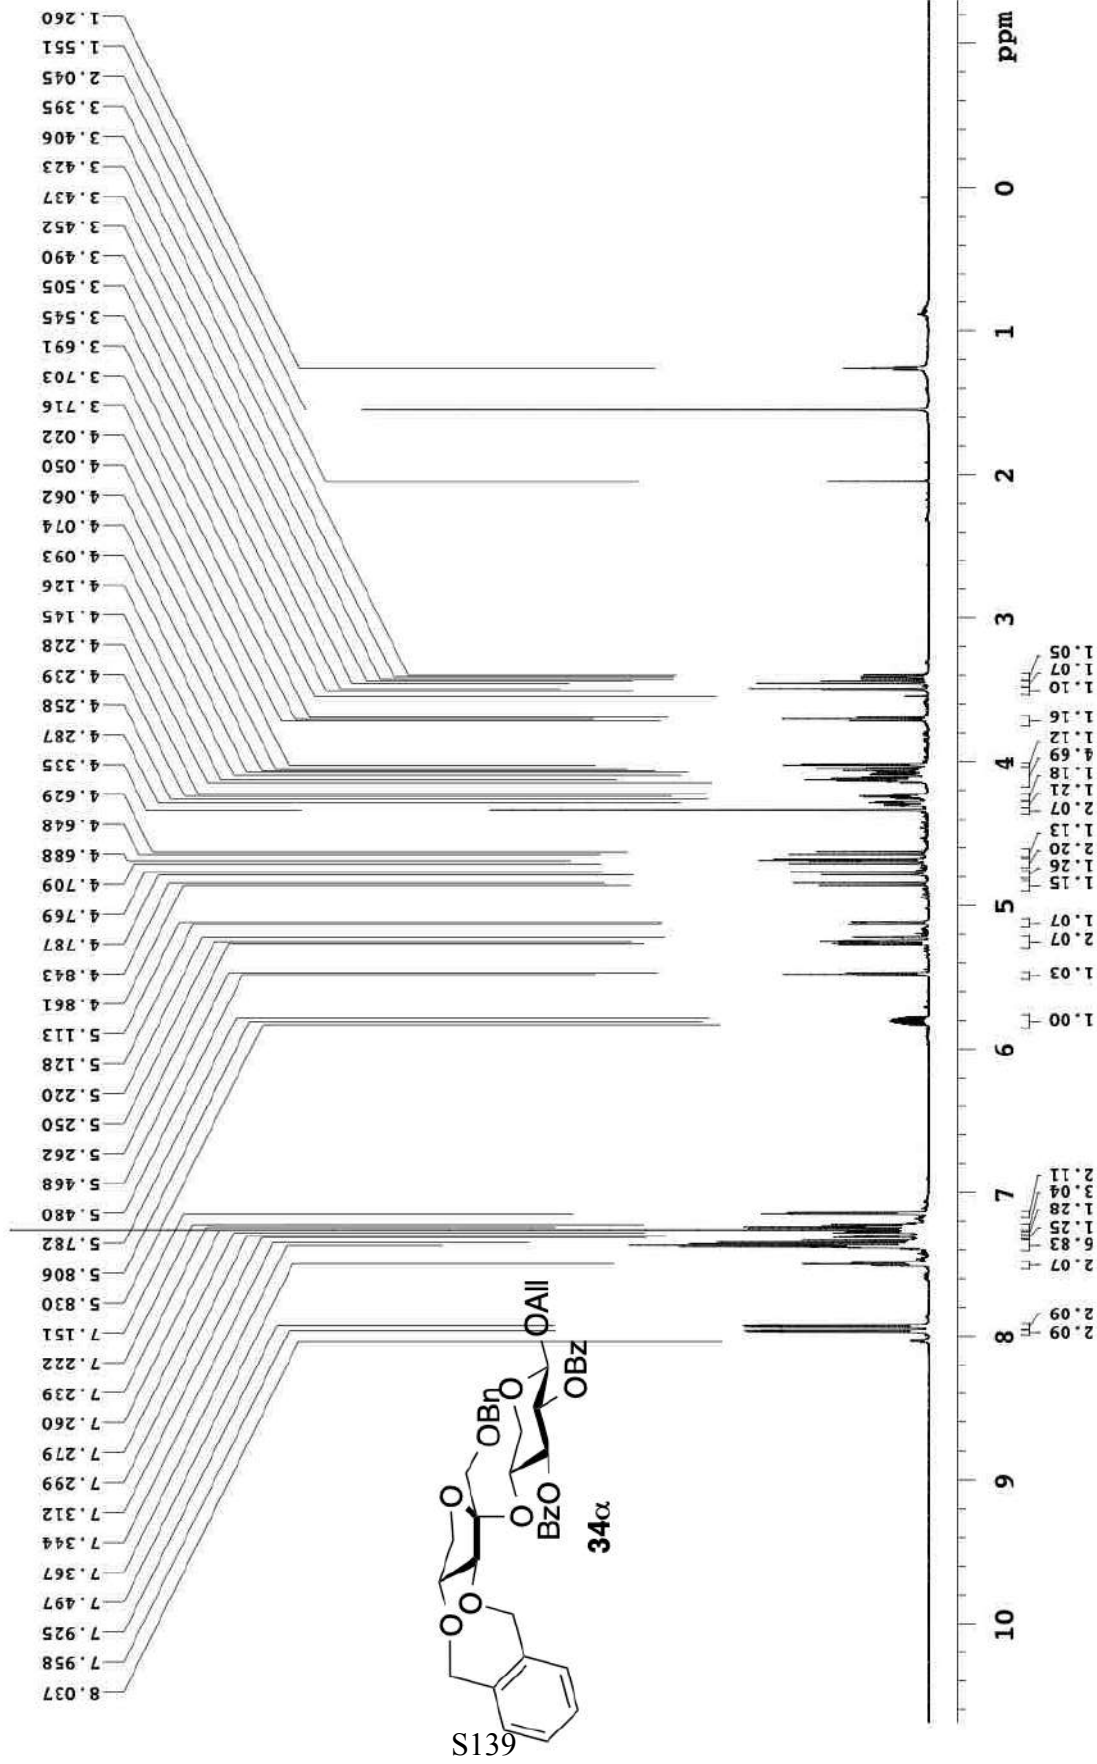

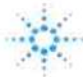

Agilent Technologies

Department of Chemistry, University of Alberta

Relaxation Delay(s): 1  
Completed Scans 256

Acquisition Time(s): 1  
Hz per mm(Hz/mm): 153.79

Sweep Width(Hz): 48076.9  
Digital Res.(Hz/pt): 0.37

Recorded on: v700, Dec 7 2016  
Pulse Sequence: s2pul

Bo-Shun, Ball-XYL-067-1  
175.975 MHz C13(H1) 1D in cdcl3 (ref. to CDCl3 @ 77.06 ppm)  
temp 27.5 C -> actual temp = 27.0 C, coldid probe

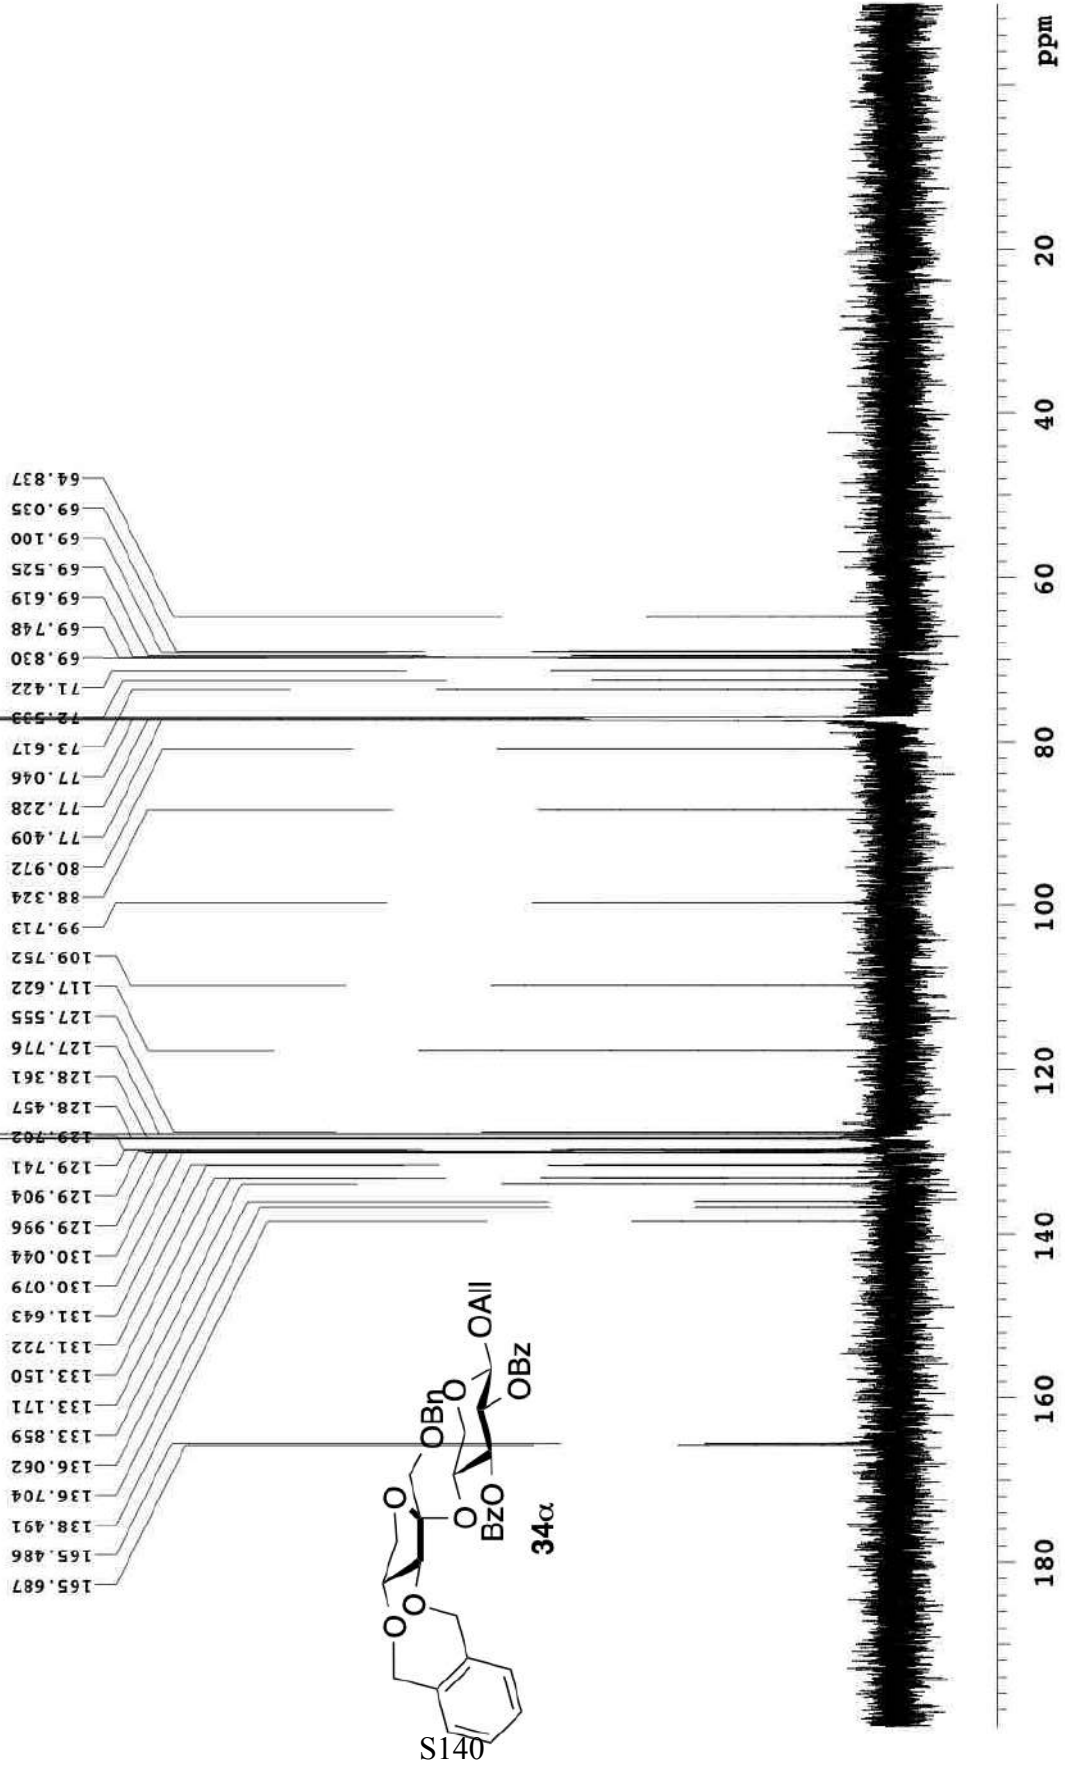



Recorded on: v700, Dec 8 2016  
 Sweep Width(Hz): 8389.26  
 Acquisition Time(s): 5  
 Relaxation Delay(s): 0.1  
 Pulse Sequence: PRESAT  
 Digital Res.(Hz/ppm): 0.13  
 Hz per mm(Hz/mm): 32.04  
 Completed Scans: 16

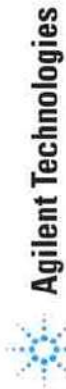

Bo-Shun, Ball-XYL-067-2  
 699.762 MHz H1 1D in cdcl3 (ref. to CDCl3 @ 7.26 ppm)  
 temp 27.5 C -> actual temp = 27.0 C, coldid probe

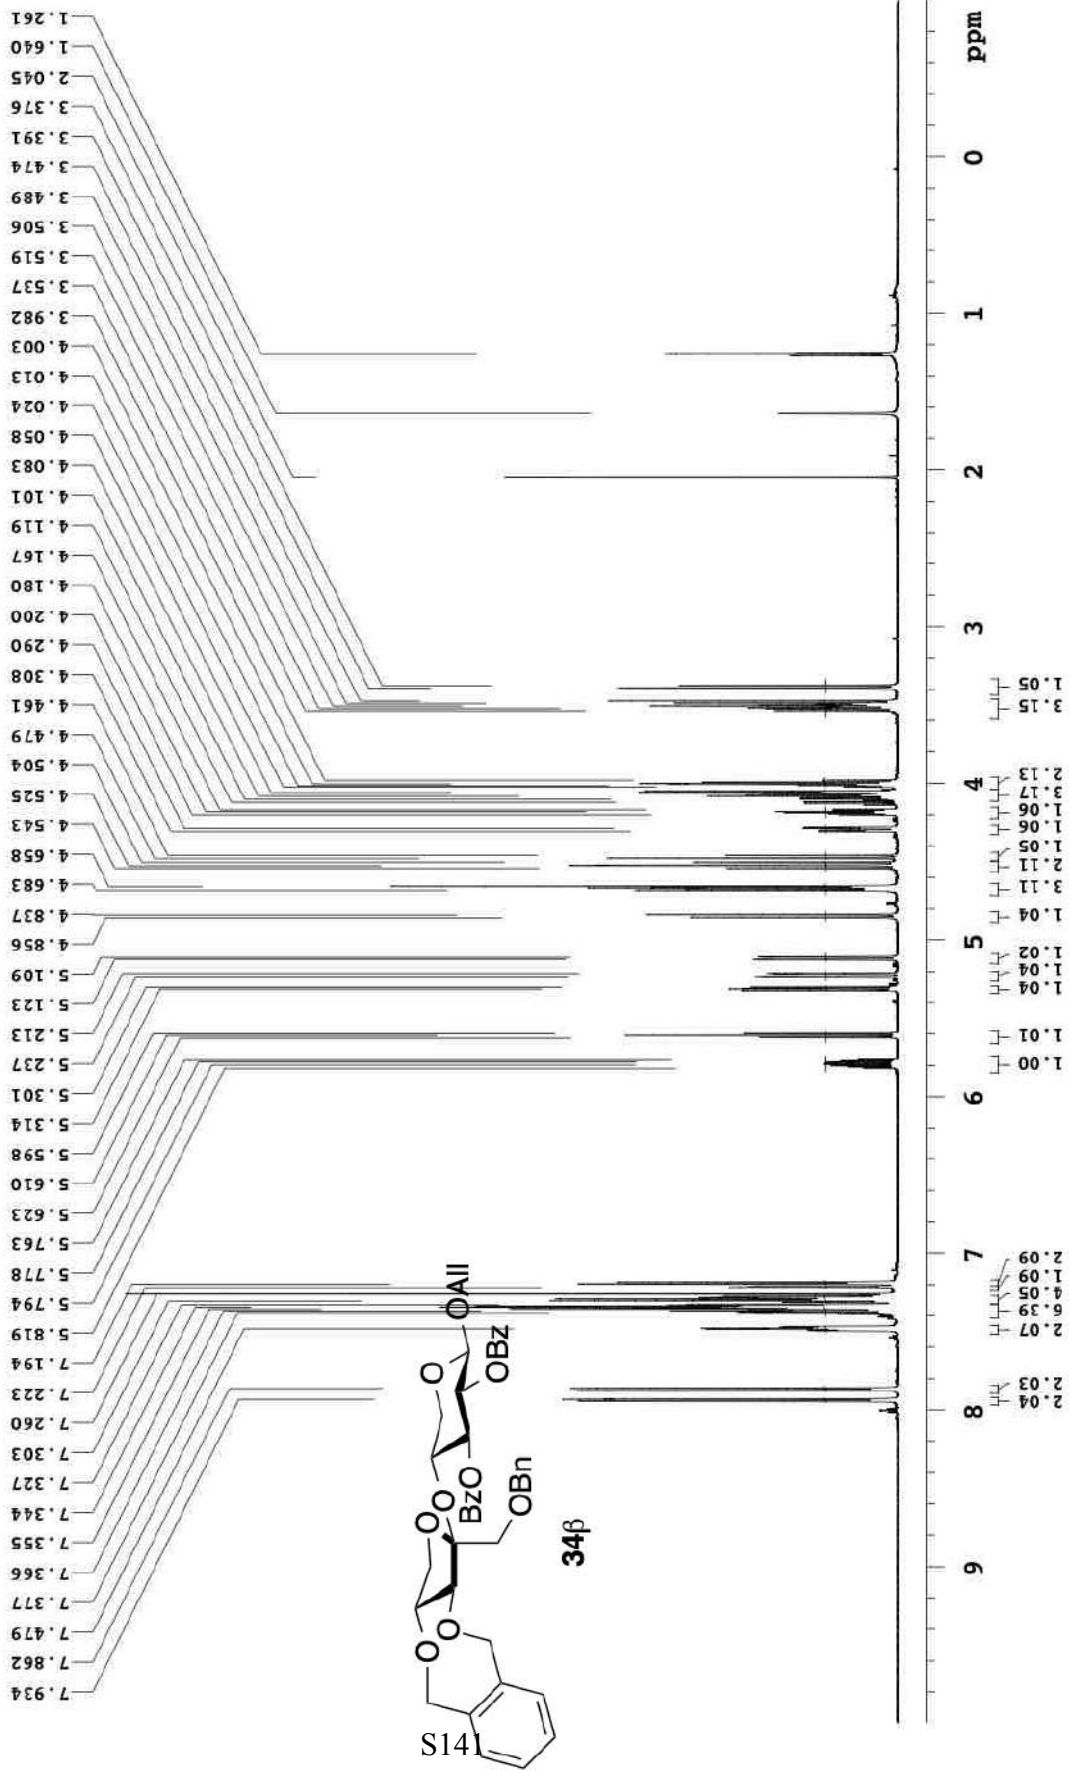

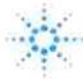

Department of Chemistry, University of Alberta

Recorded on: v700, Dec 8 2016  
Pulse Sequence: s2pul

Sweep Width (Hz): 48076.9  
Digital Res. (Hz/ppm): 0.37

Acquisition Time(s): 1  
Hz per mm(Hz/mm): 153.53

Relaxation Delay(s): 1  
Completed Scans: 256

Bo-Shun, Ball-XYL-067-2  
175.975 MHz C13(H1) 1D in cdcl3 (ref. to CDCl3 @ 77.06 ppm)  
temp 27.5 C -> actual temp = 27.0 C, coldid probe

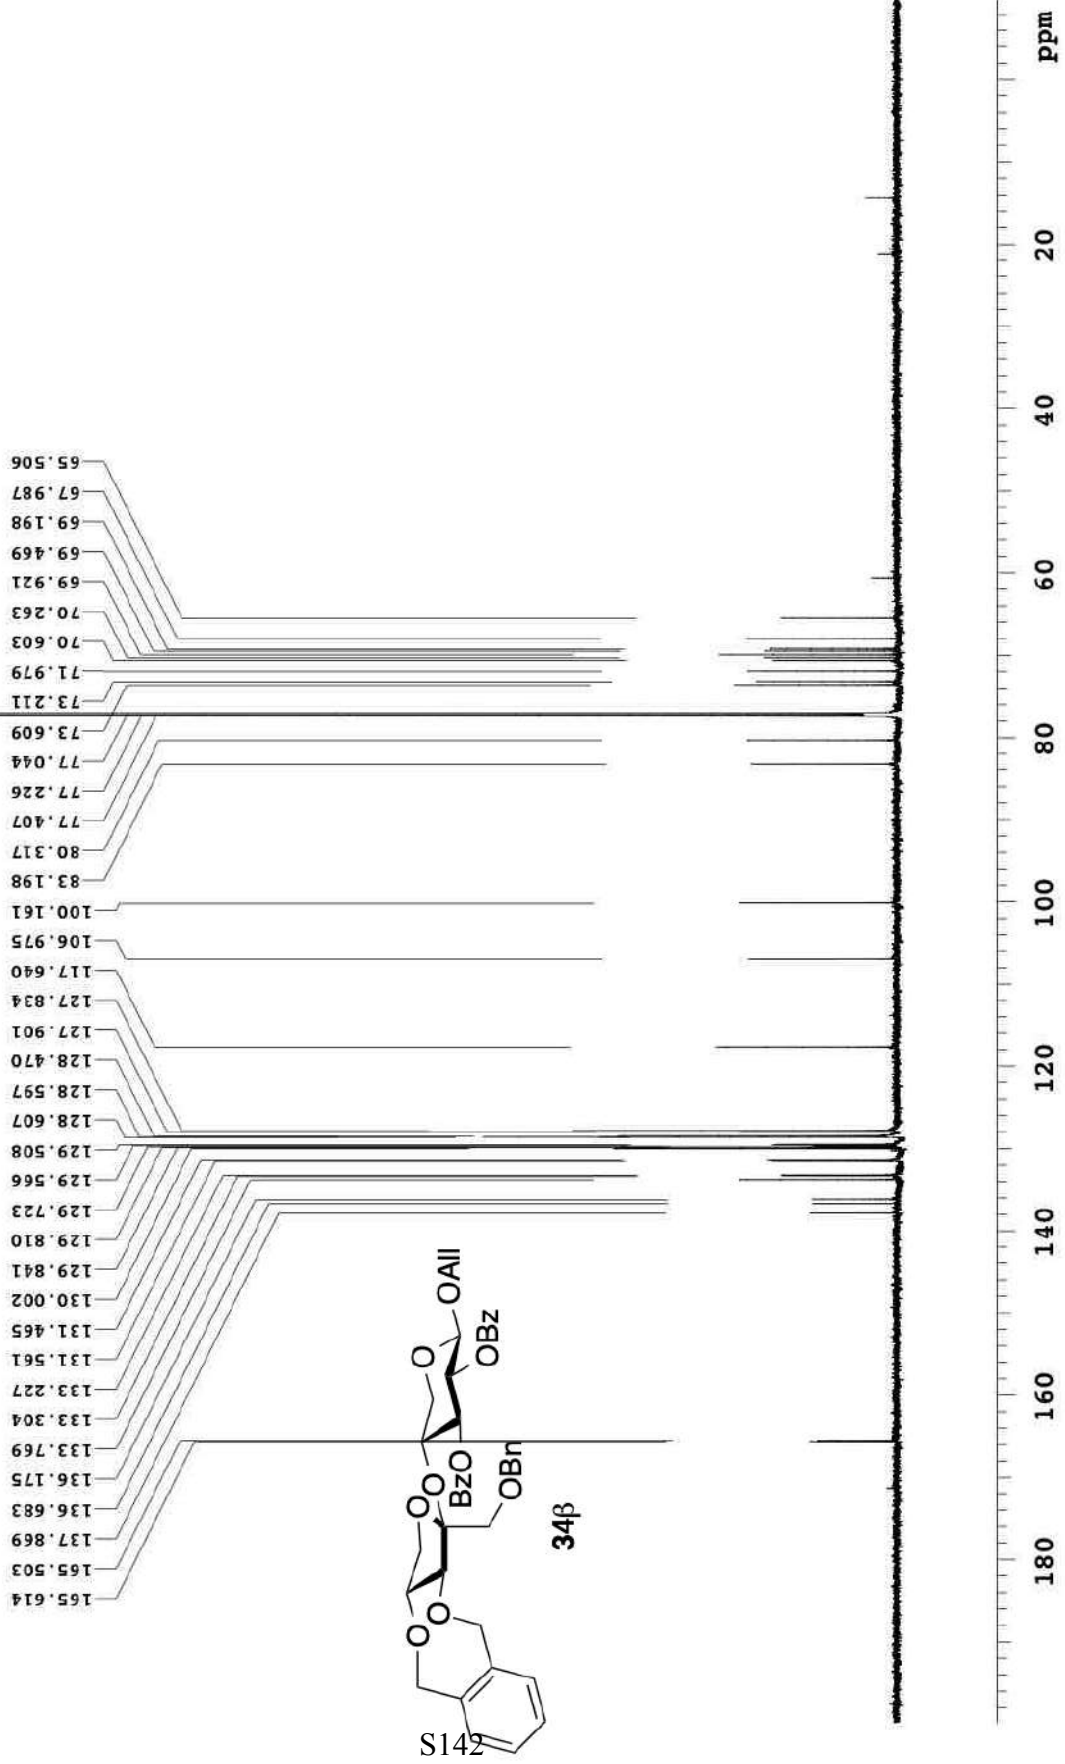

Recorded on: **u500, May 4 2017** Sweep Width(Hz): **6009.62** Acquisition Time(s): **5** Relaxation Delay(s): **0.1**  
 Pulse Sequence: **PRESAT** Digital Res.(Hz/ppm): **0.09** Hz per mm(Hz/mm): **25.04** Completed Scans: **16**

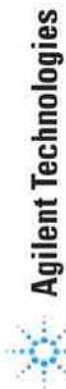

Bo-Shun, Ball-XYL-132-1  
 499.797 MHz H1 1D in cdcl3 (ref. to CDCl3 @ 7.26 ppm)  
 temp 27.7 C -> actual temp = 27.0 C, coldludal probe

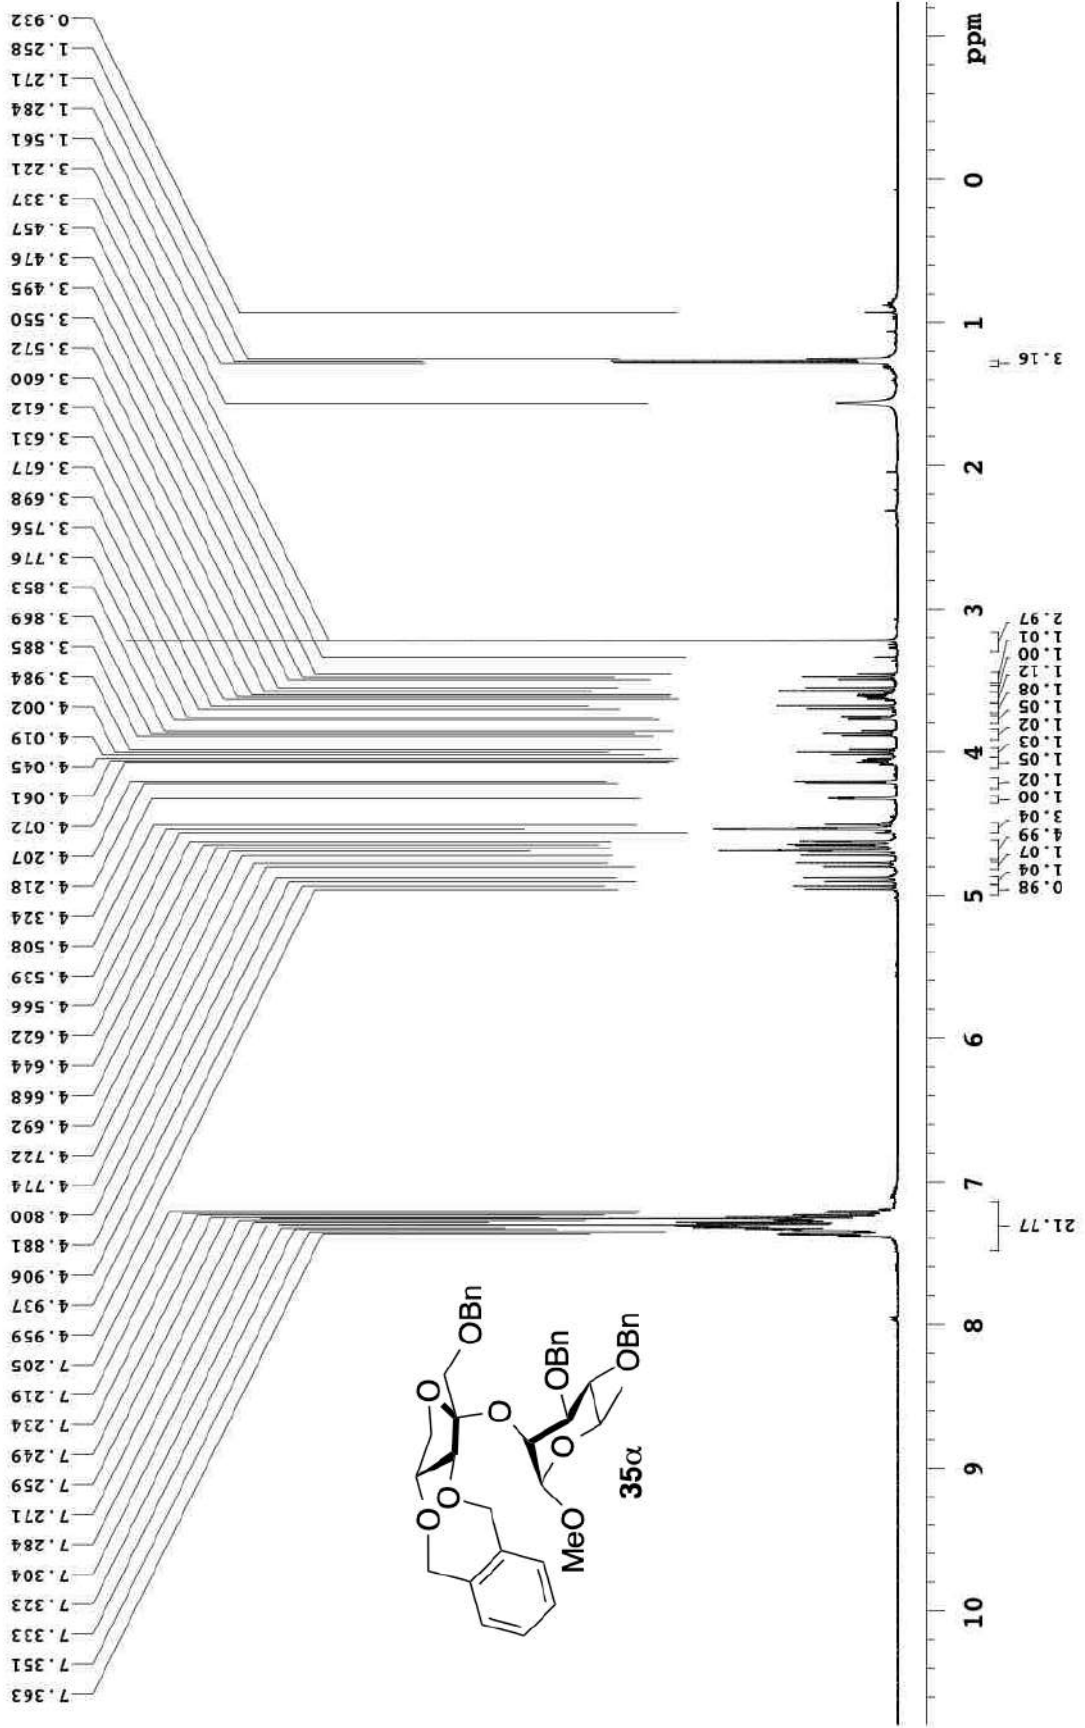

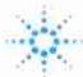

Recorded on: **u500, May 4 2017**    Sweep Width(Hz): **33783.8**    Acquisition Time(s): **1**    Relaxation Delay(s): **1**  
Pulse Sequence: **s2pul**    Digital Res.(Hz/pt): **0.26**    Hz per mm(Hz/mm): **140.76**    Completed Scans: **128**

Bo-Shun, Ball-XYL-132-1  
125.688 MHz C13(H1) 1D in cdcl3 (ref. to CDC13 @ 77.06 ppm)  
temp 27.7 C -> actual temp = 27.0 C, coldlial probe

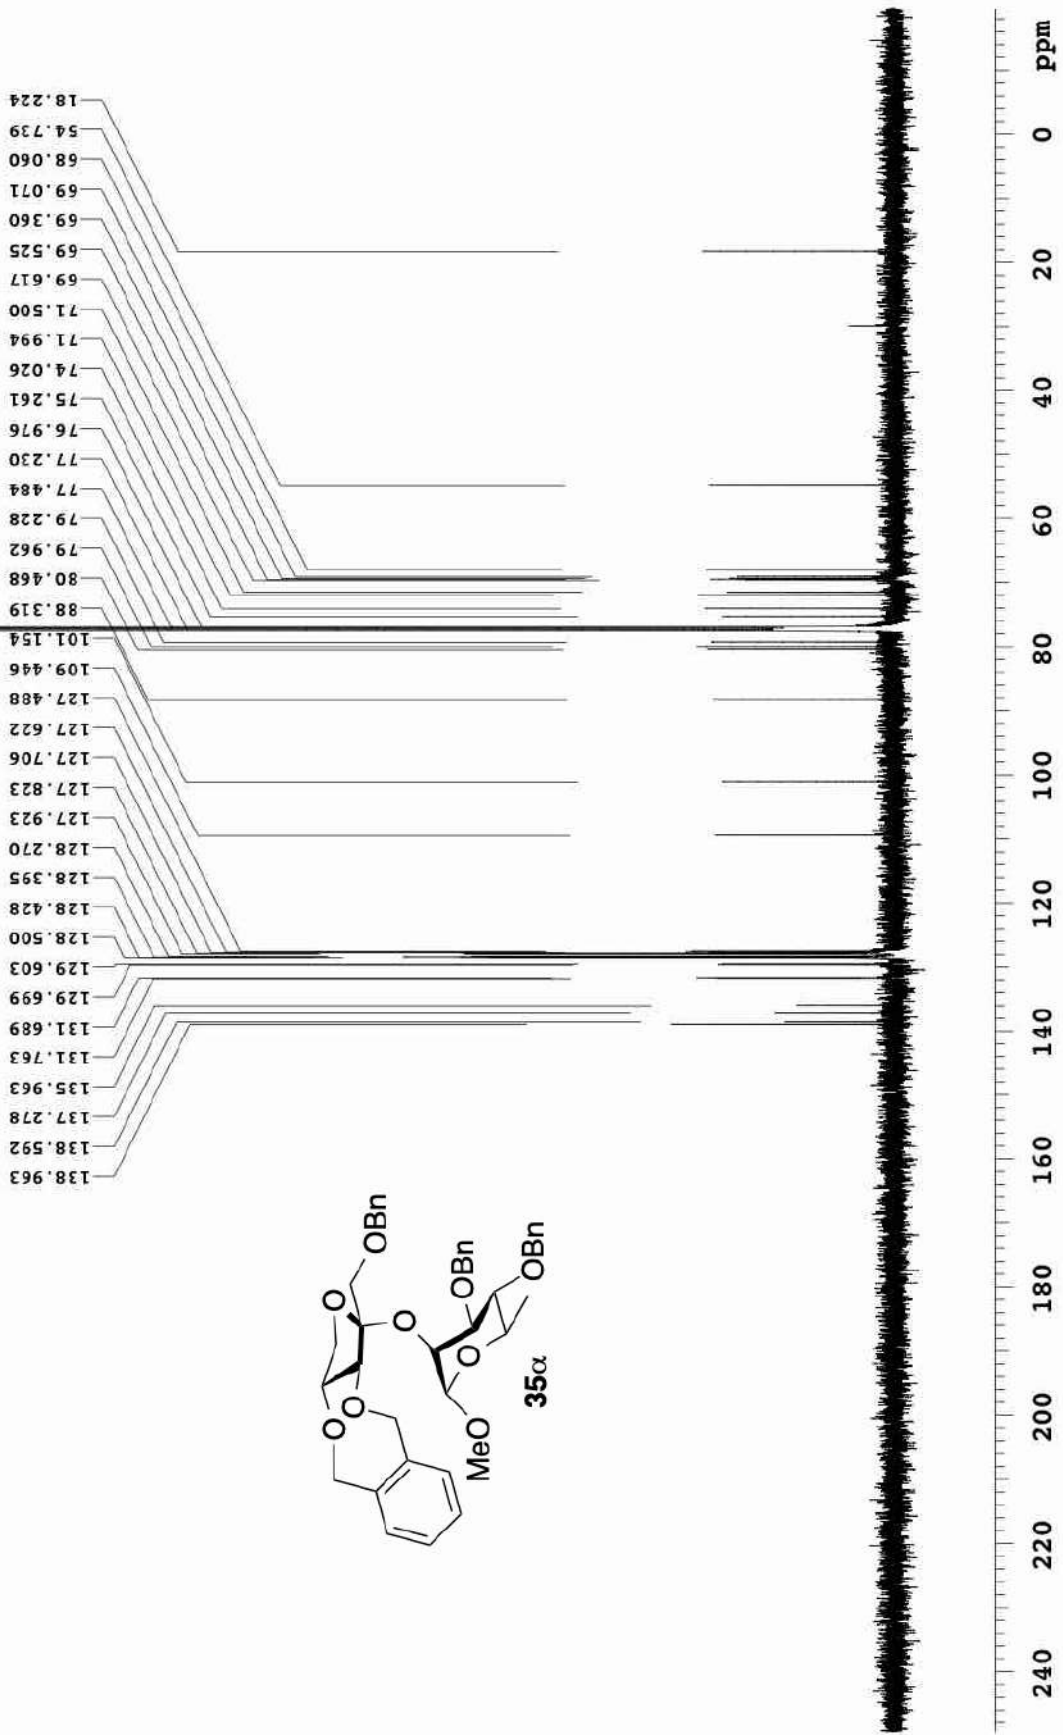



Recorded on: **u500, May 4 2017** Sweep Width(Hz): **6009.62** Acquisition Time(s): **5** Relaxation Delay(s): **0.1**  
 Pulse Sequence: **PRESAT** Digital Res.(Hz/ppm): **22.91** Hz per mm(Hz/mm): **22.91** Completed Scans: **16**



Bo-Shun, Ball-XYL-132-2  
 499.797 MHz H1 1D in cdcl3 (ref. to CDCl3 @ 7.26 ppm)  
 temp 27.7 C -> actual temp = 27.0 C, coldludal probe

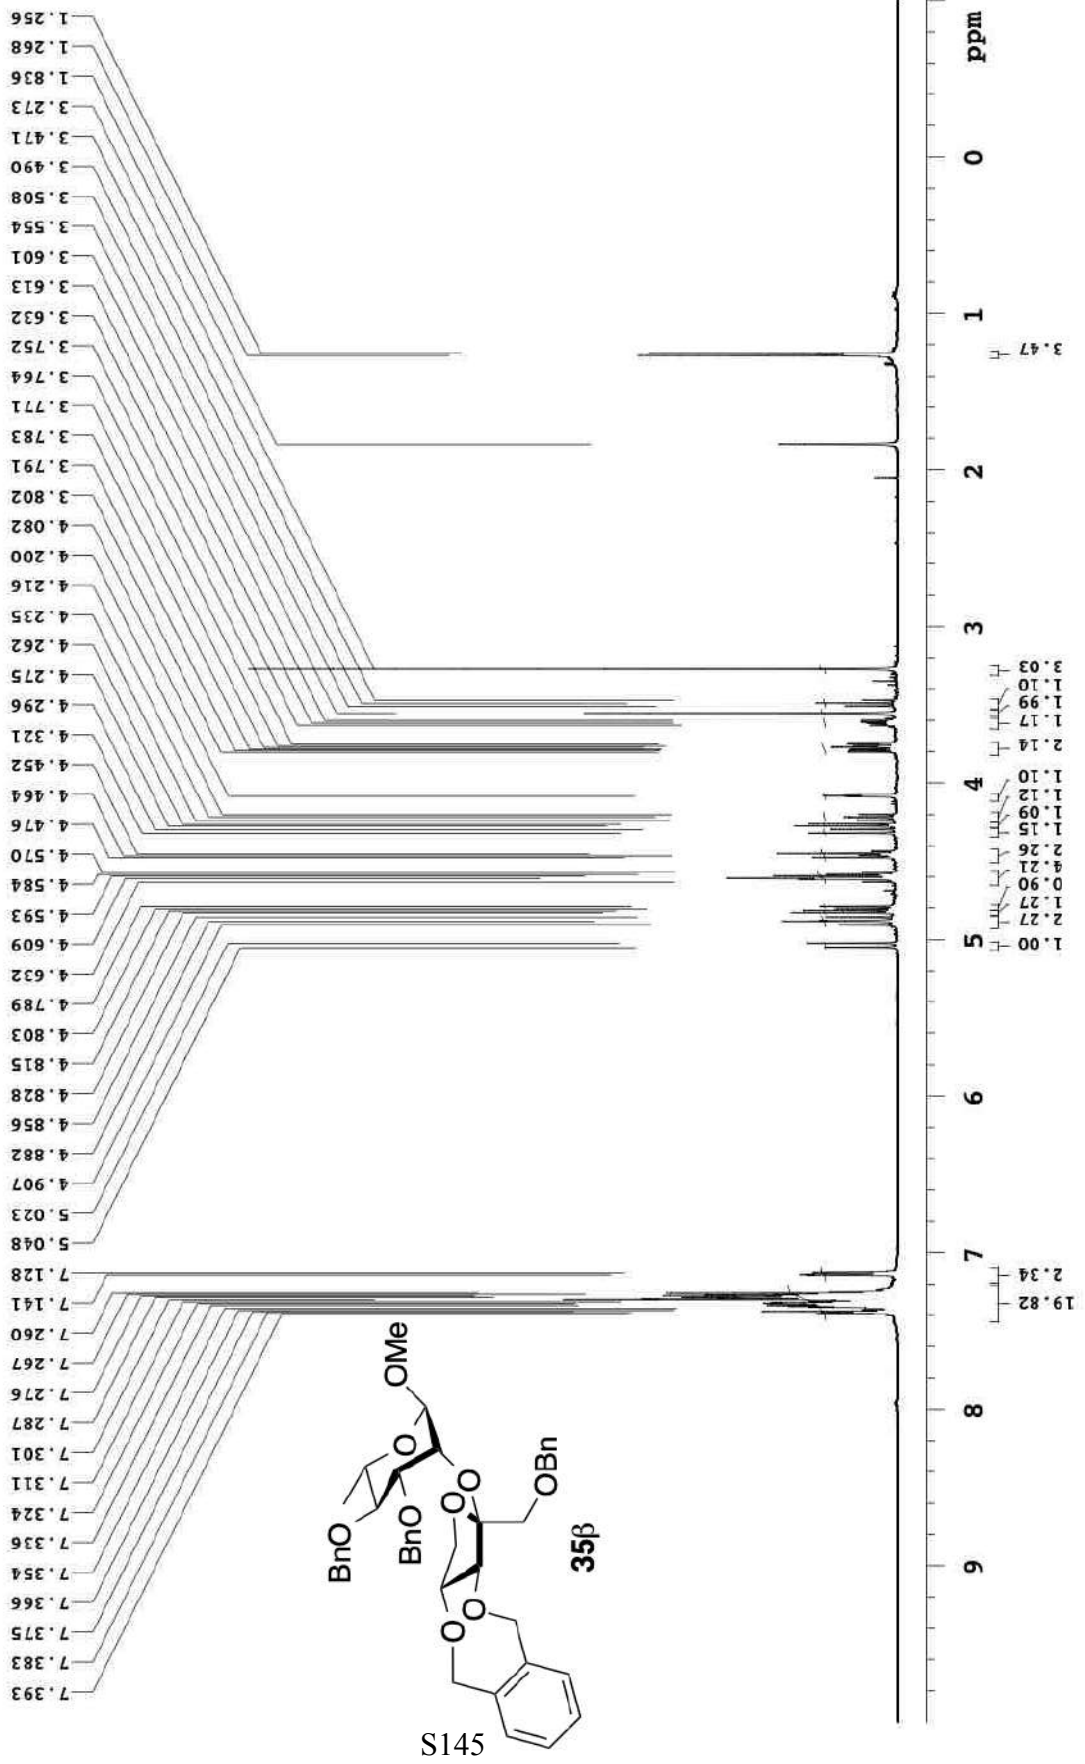

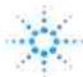

Bo-Shun, Ball-XYL-132-2  
125.688 MHz C13(H1) 1D in cdcl3 (ref. to CDC13 @ 77.06 ppm)  
temp 27.7 C -> actual temp = 27.0 C, coldlial probe

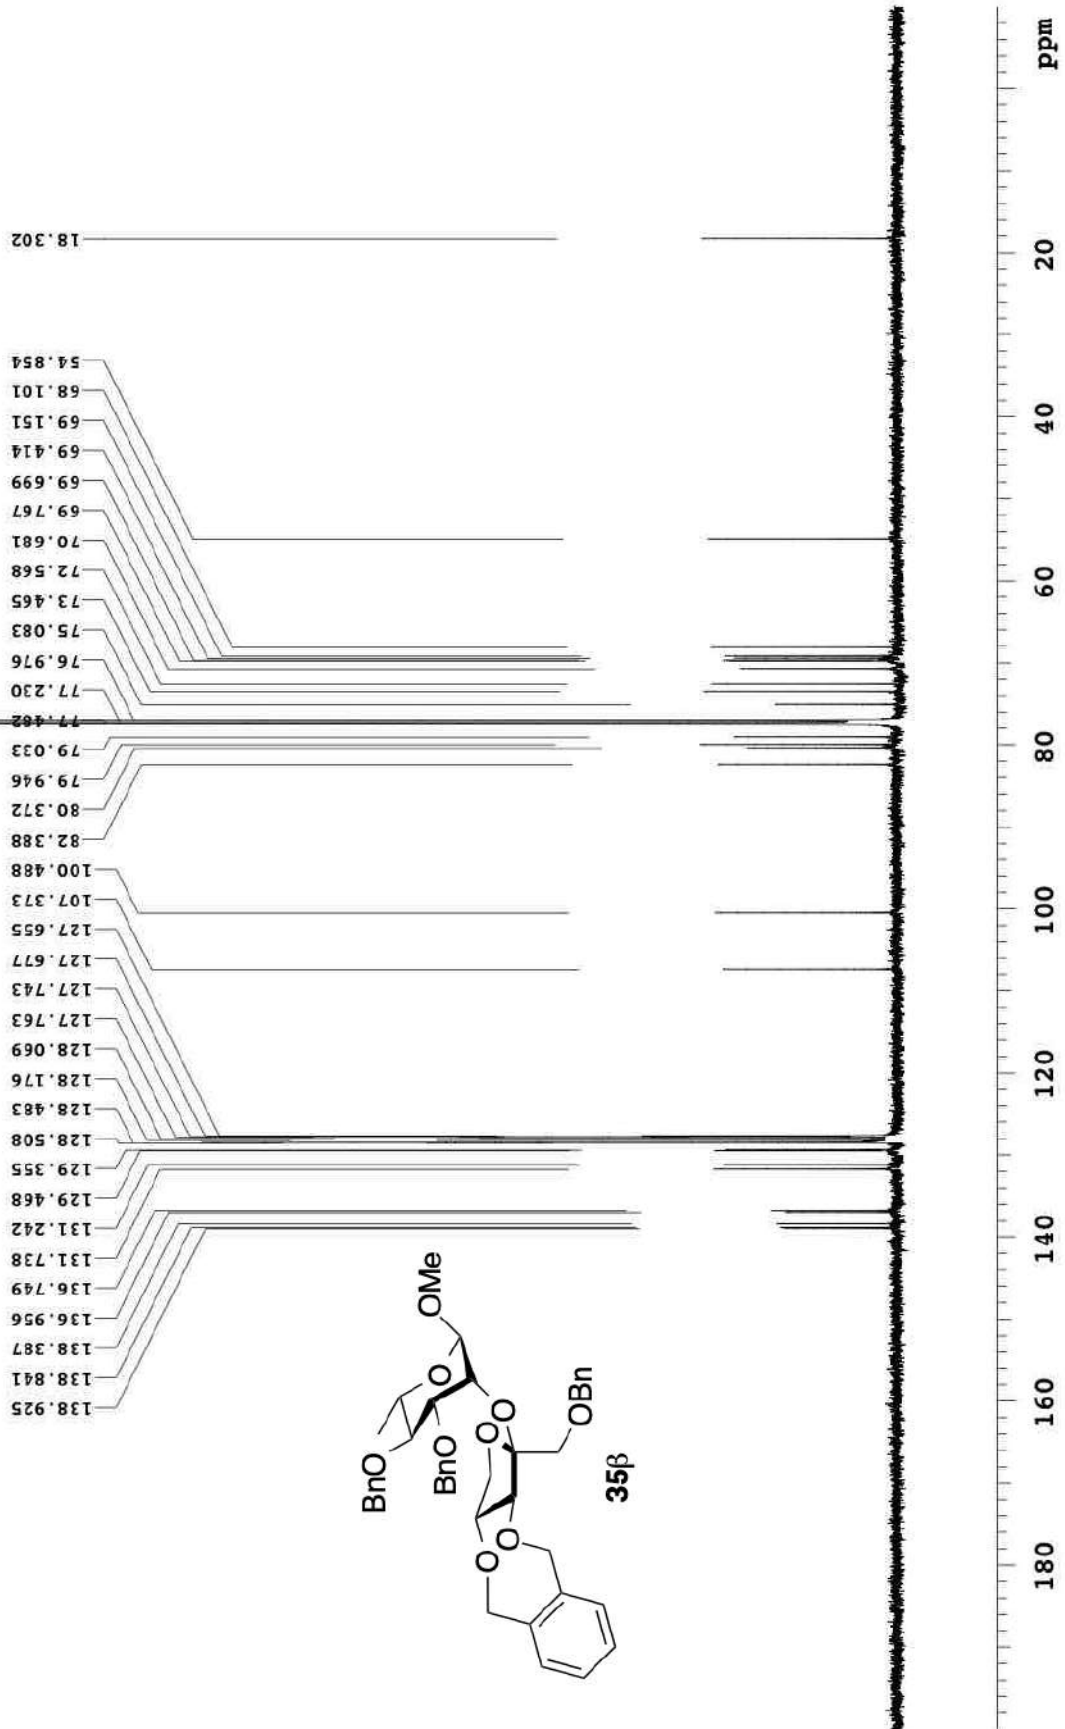



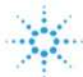

Recorded on: **u500, Jun 24 2016**

Sweep Width(Hz): **32894.7**

Acquisition Time(s): **1**

Relaxation Delay(s): **1**

Pulse Sequence: **s2pul**

Digital Res.(Hz/pt): **0.25**

Hz per mm(Hz/mm): **137.06**

Completed Scans **128**

Bo-Shun, Ball-XYL-043-1  
125.691 MHz C13[1H] 1D in cdcl3 (ref. to CDCB @ 77.06 ppm), temp 27.7 C -> actual temp = 27.0 C, coldludal probe

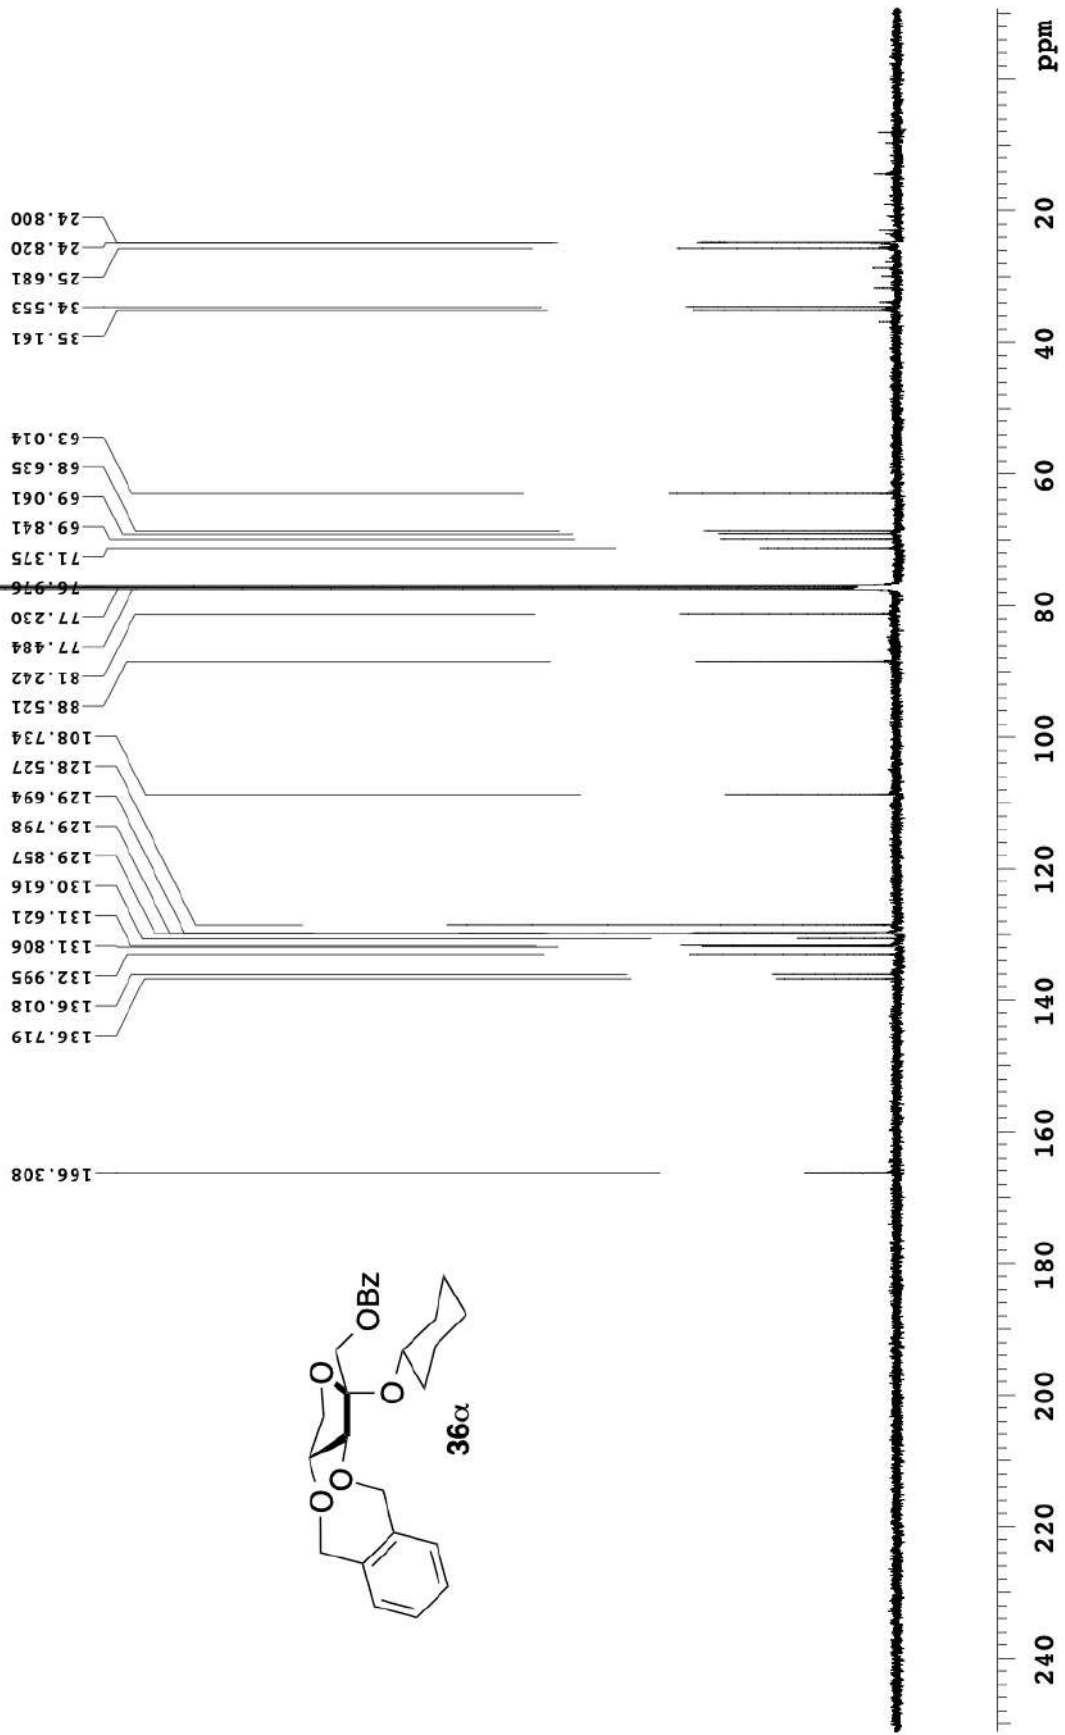







Recorded on: **u500, Jan 31 2017** Sweep Width(Hz): **6009.62** Acquisition Time(s): **5** Relaxation Delay(s): **0.1**  
 Pulse Sequence: **PRESAT** Digital Res.(Hz/ppm): **0.09** Hz per mm(Hz/mm): **22.92** Completed Scans: **16**

Bo-Shun, Ball-XYL-081-1  
 499.797 MHz H1 1D in cdcl3 (ref. to CDCl3 @ 7.26 ppm)  
 temp 27.7 C -> actual temp = 27.0 C, coldludal probe

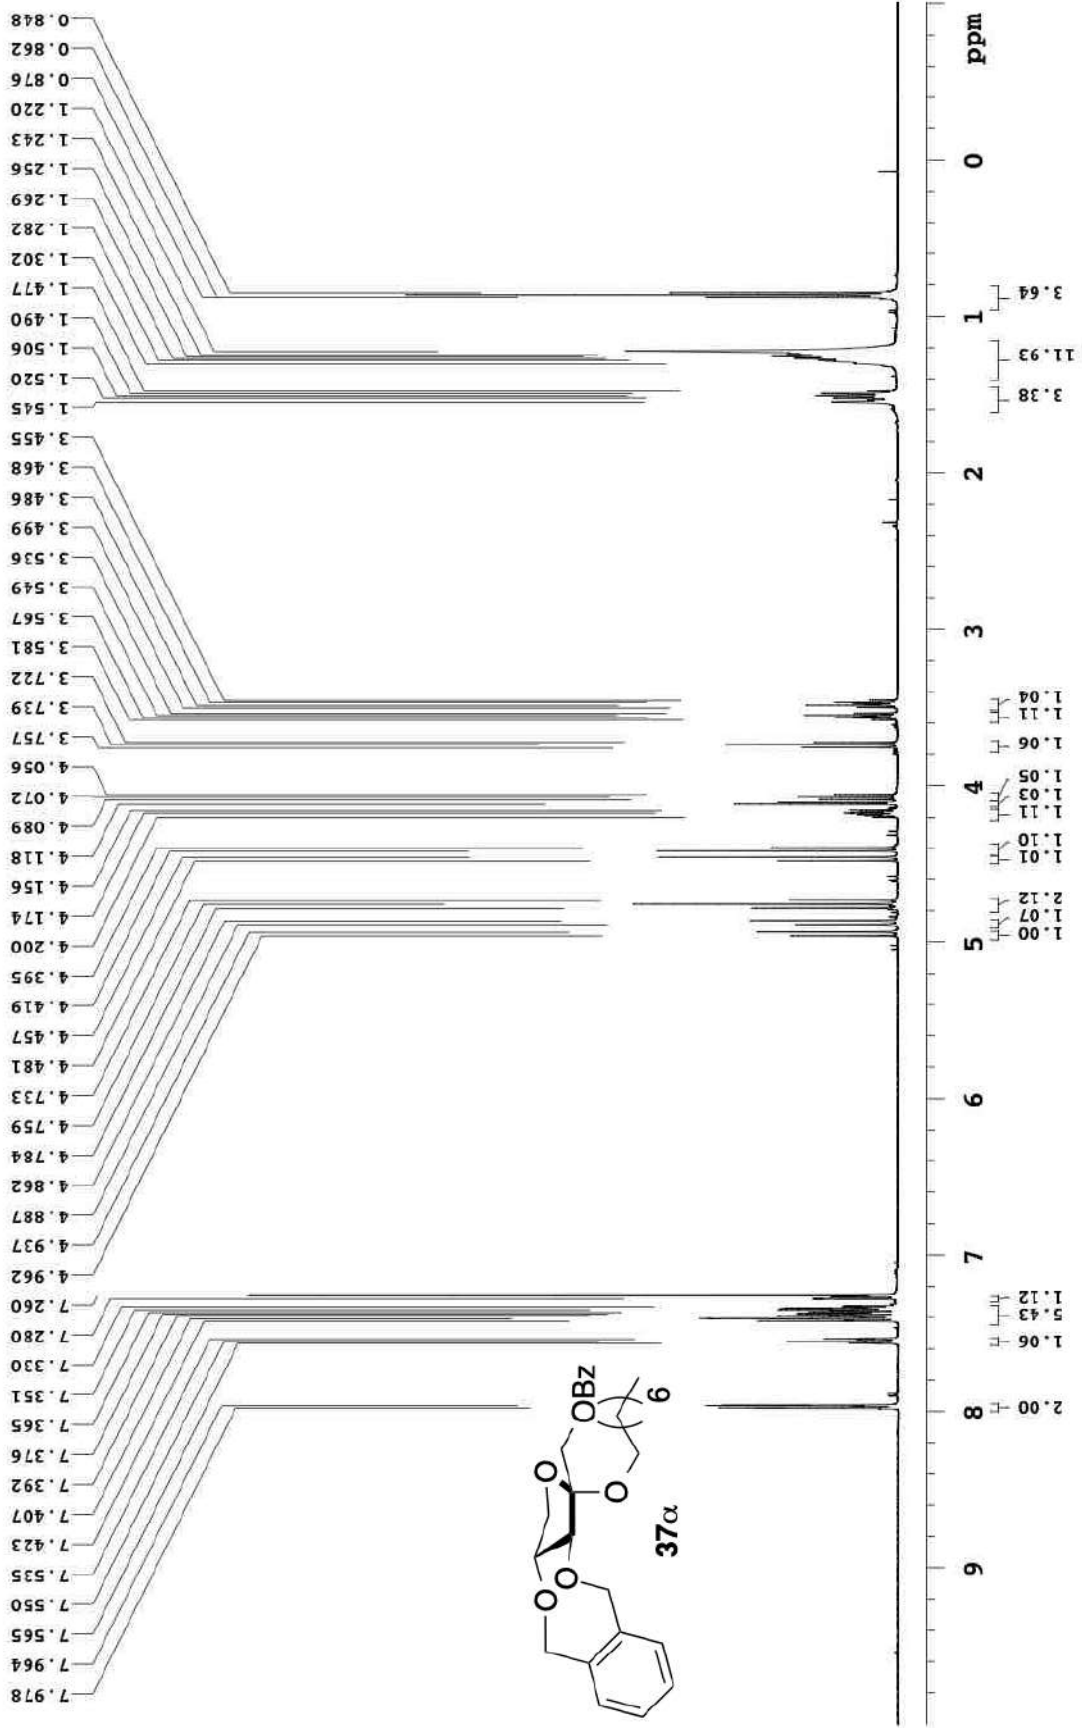

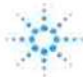

Department of Chemistry, University of Alberta

Recorded on: **u500, Jan 31 2017**  
Pulse Sequence: **s2pul**

Sweep Width(Hz): **33783.8**  
Digital Res.(Hz/ppm): **0.26**

Acquisition Time(s): **1**  
Hz per mm(Hz/mm): **110.08**

Relaxation Delay(s): **1**  
Completed Scans: **128**

Bo-Shun, Ball-XYL-081-1  
125.688 MHz C13(H1) 1D in cdcl3 (ref. to CDC13 @ 77.06 ppm)  
temp 27.7 C -> actual temp = 27.0 C, coldlial probe

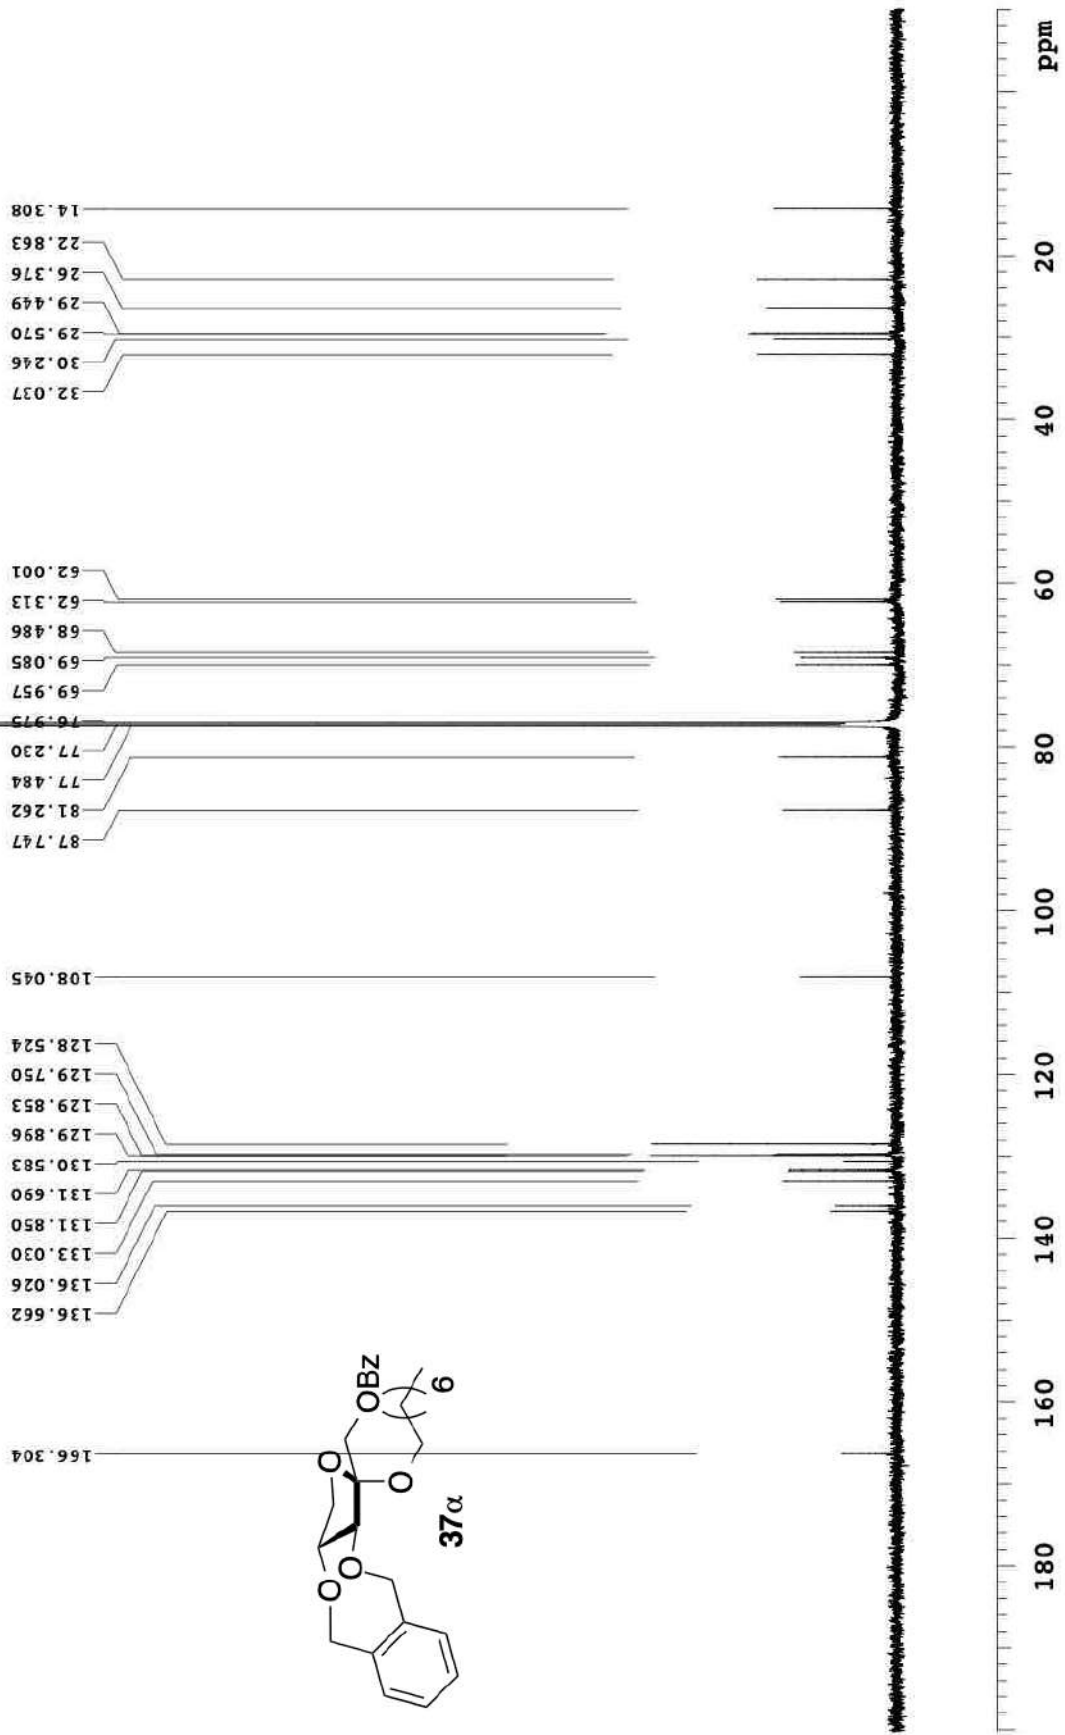

S152





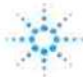

Department of Chemistry, University of Alberta

Recorded on: **u500, Feb 1 2017**  
Pulse Sequence: **s2pul**

Sweep Width(Hz): **33783.8**  
Digital Res.(Hz/ppm): **0.26**

Acquisition Time(s): **1**  
Hz per mm(Hz/mm): **109.99**

Relaxation Delay(s): **1**  
Completed Scans: **128**

Bo-Shun, Ball\_-XYL-081-2  
125.688 MHz C13(H1) 1D in cdcl3 (ref. to CDC13 @ 77.06 ppm)  
temp 27.7 C -> actual temp = 27.0 C, coldlial probe

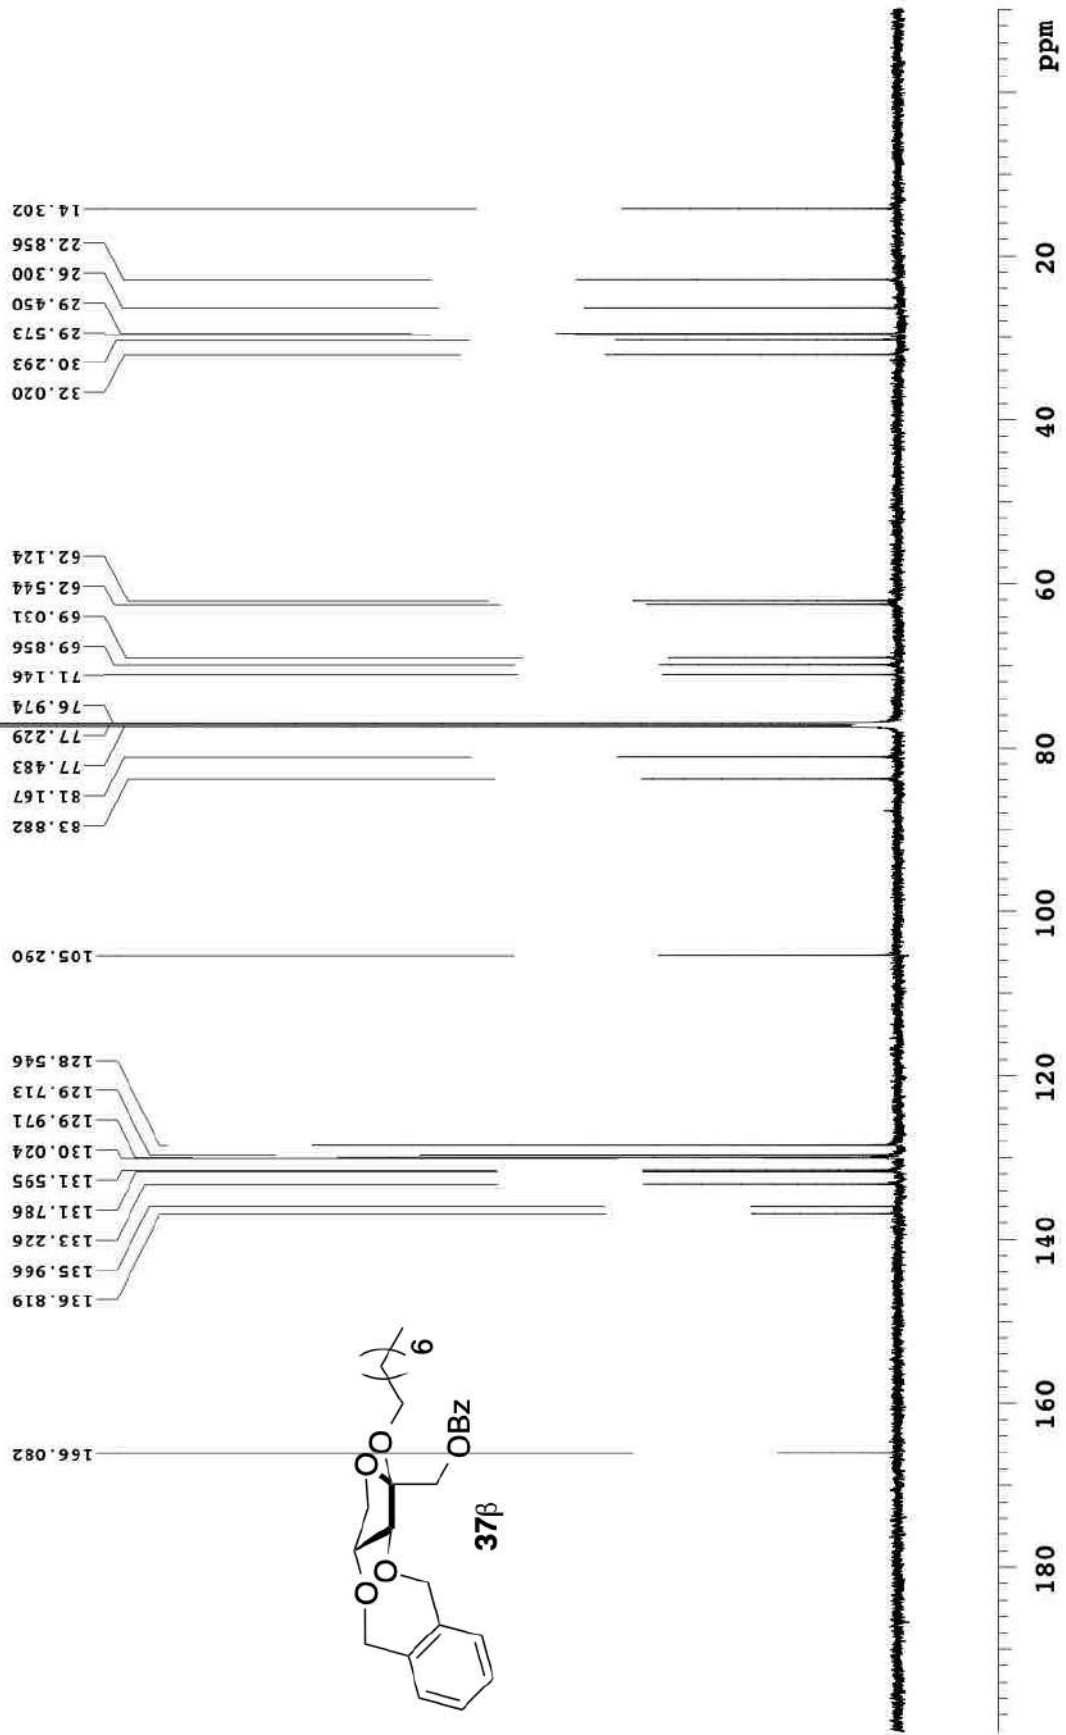

S154



Department of Chemistry, University of Alberta

Relaxation Delay(s): 0.1  
Completed Scans 16

Acquisition Time(s): 5  
Hz per mm(Hz/mm): 22.91

Sweep Width(Hz): 6009.62  
Digital Res.(Hz/pt): 0.09

Recorded on: u500, Feb 4 2017  
Pulse Sequence: PRESAT

Bo-Shun, Ball-XYL-085-1  
499.797 MHz H1 1D in cdcl3 (ref. to CDCl3 @ 7.26 ppm)  
temp 27.7 C -> actual temp = 27.0 C, coldlud probe

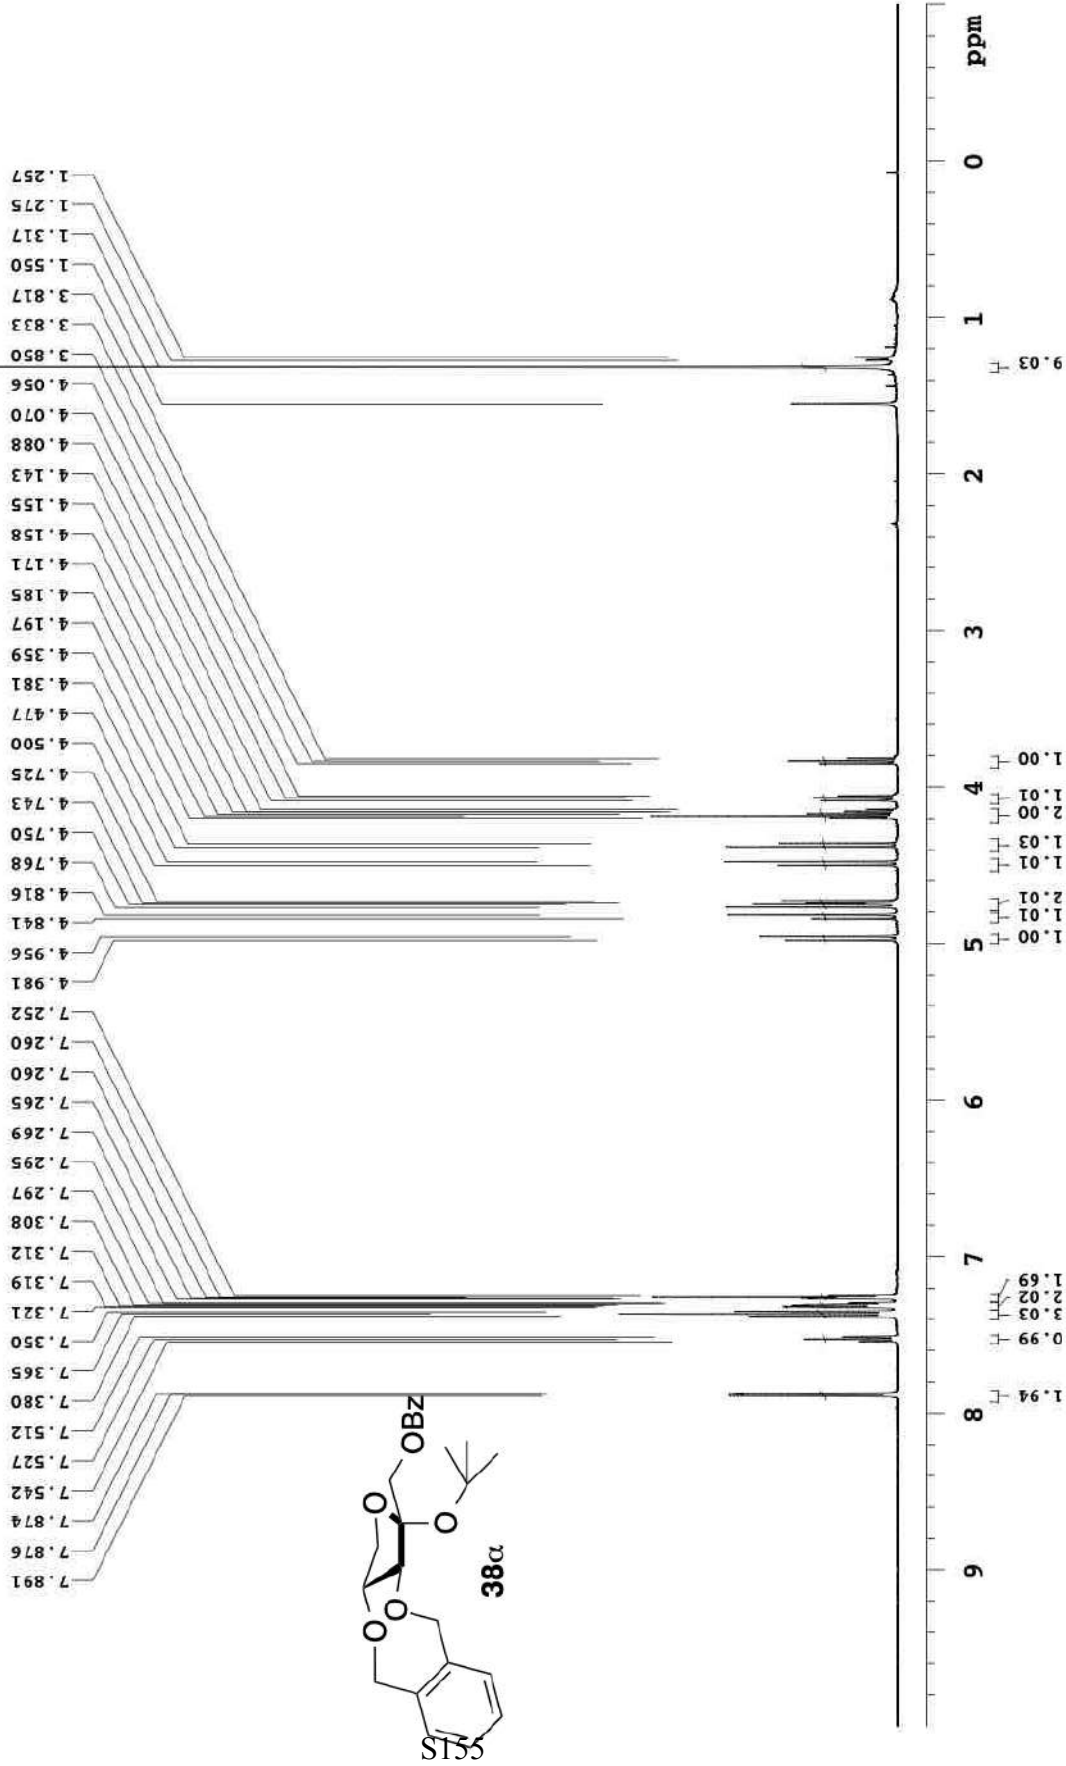







Agilent Technologies

Department of Chemistry, University of Alberta

Recorded on: **u500, Feb 4 2017**    Sweep Width (Hz): **6009.62**    Acquisition Time(s): **5**    Relaxation Delay(s): **0.1**  
Pulse Sequence: **PRESAT**    Digital Res. (Hz/ppm): **0.09**    Hz per mm(Hz/mm): **22.91**    Completed Scans: **16**

Bo-Shun, Ball-XYL-085-2  
499.797 MHz H1 1D in cdcl3 (ref. to CDCl3 @ 7.26 ppm)  
temp 27.7 C -> actual temp = 27.0 C, coldbld probe

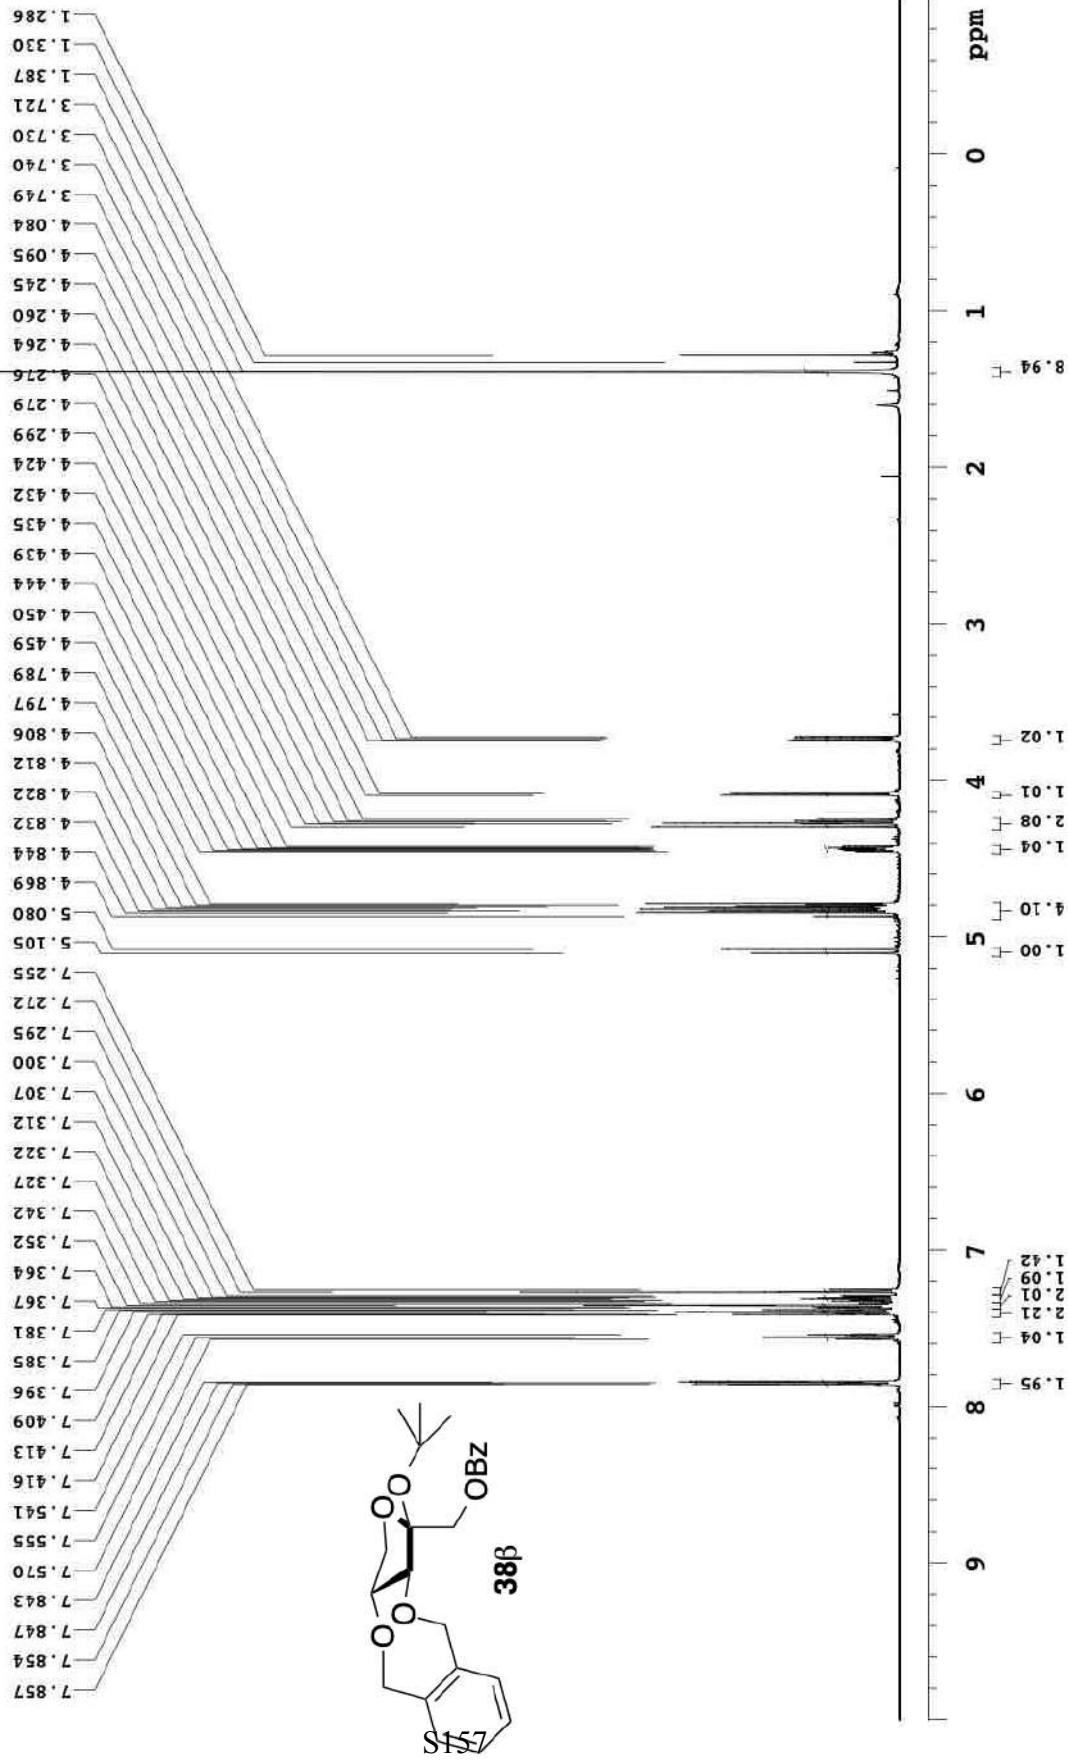





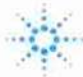

Department of Chemistry, University of Alberta

Recorded on: **u500, Feb 2 2017**    Sweep Width(Hz): **33783.8**    Acquisition Time(s): **1**    Relaxation Delay(s): **1**  
Pulse Sequence: **s2pul**    Digital Res.(Hz/ppm): **0.26**    Hz per mm(Hz/mm): **110.08**    Completed Scans: **128**

Bo-Shun, Ball-XYL-082-1  
125.688 MHz C13(H1) 1D in cdcl3 (ref. to CDCl3 @ 77.06 ppm)  
temp 27.7 C -> actual temp = 27.0 C, coldlial probe

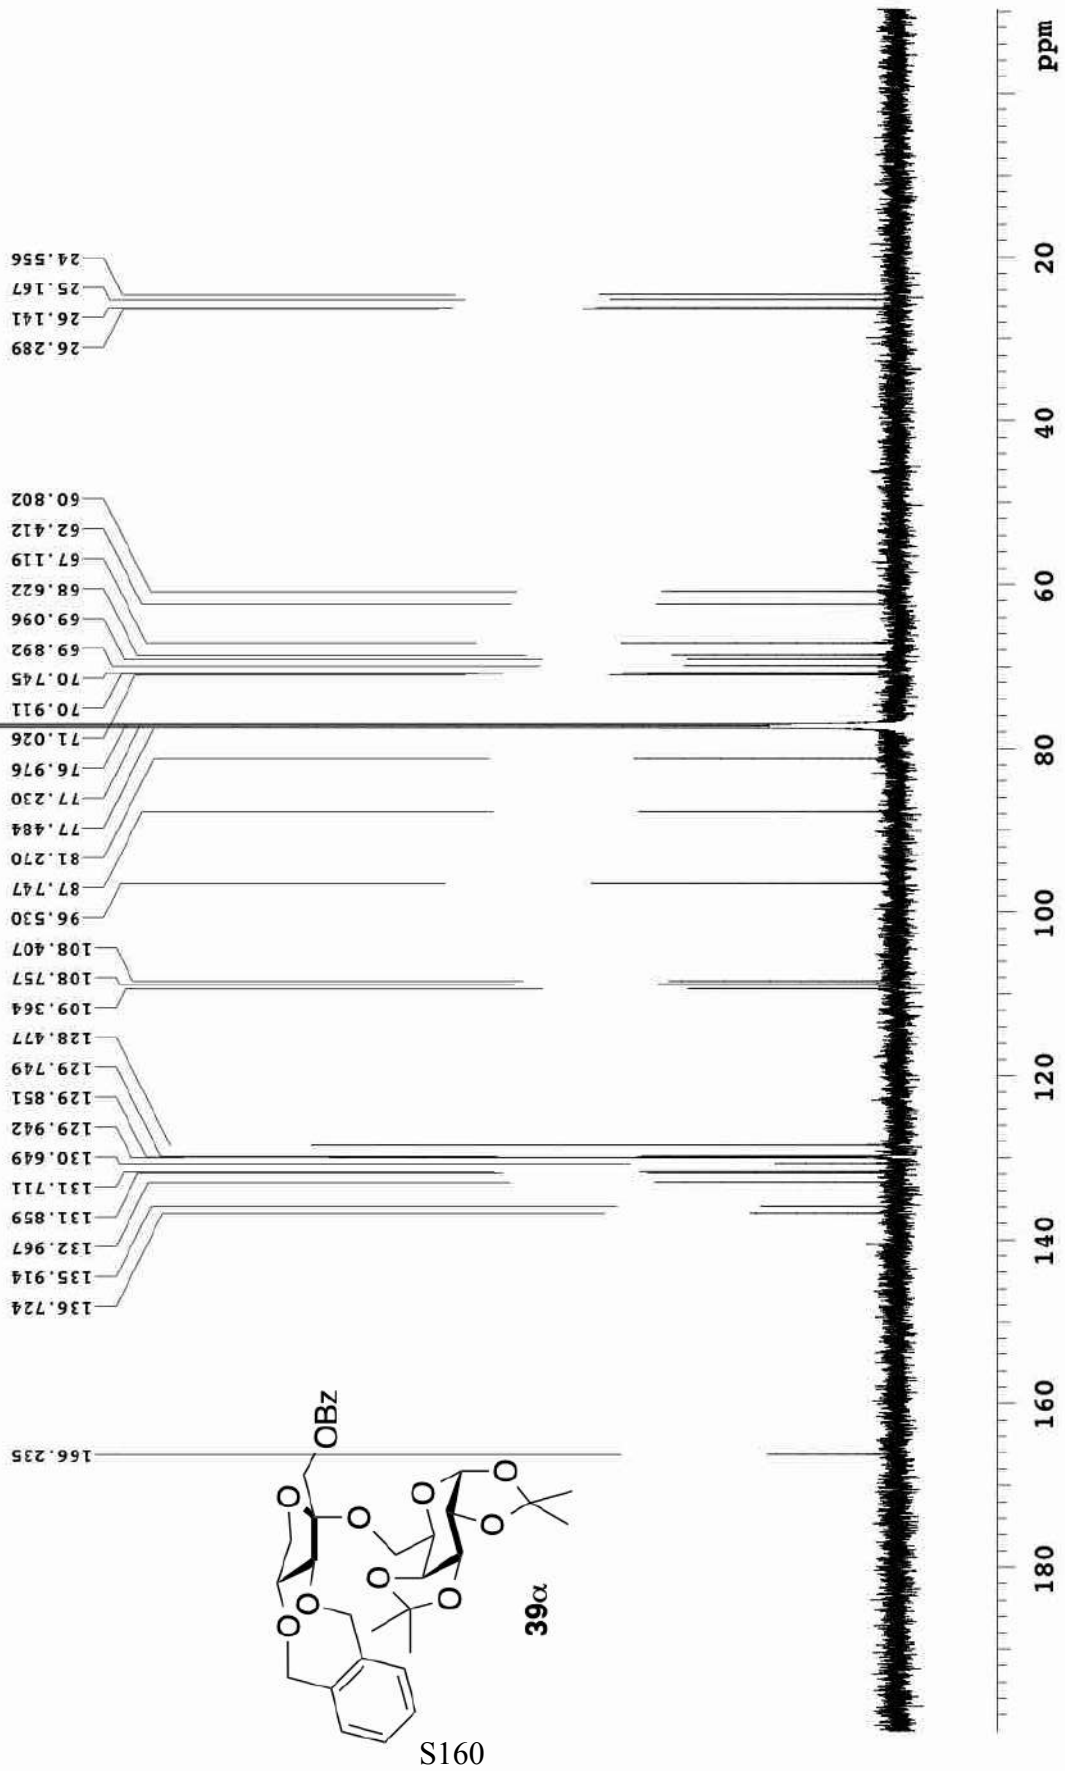





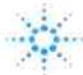

Bo-Shun, Ball-XYL-082-2  
125.688 MHz C13(H1) 1D in cdcl3 (ref. to CDCl3 @ 77.06 ppm)  
temp 27.7 C -> actual temp = 27.0 C, coldlial probe

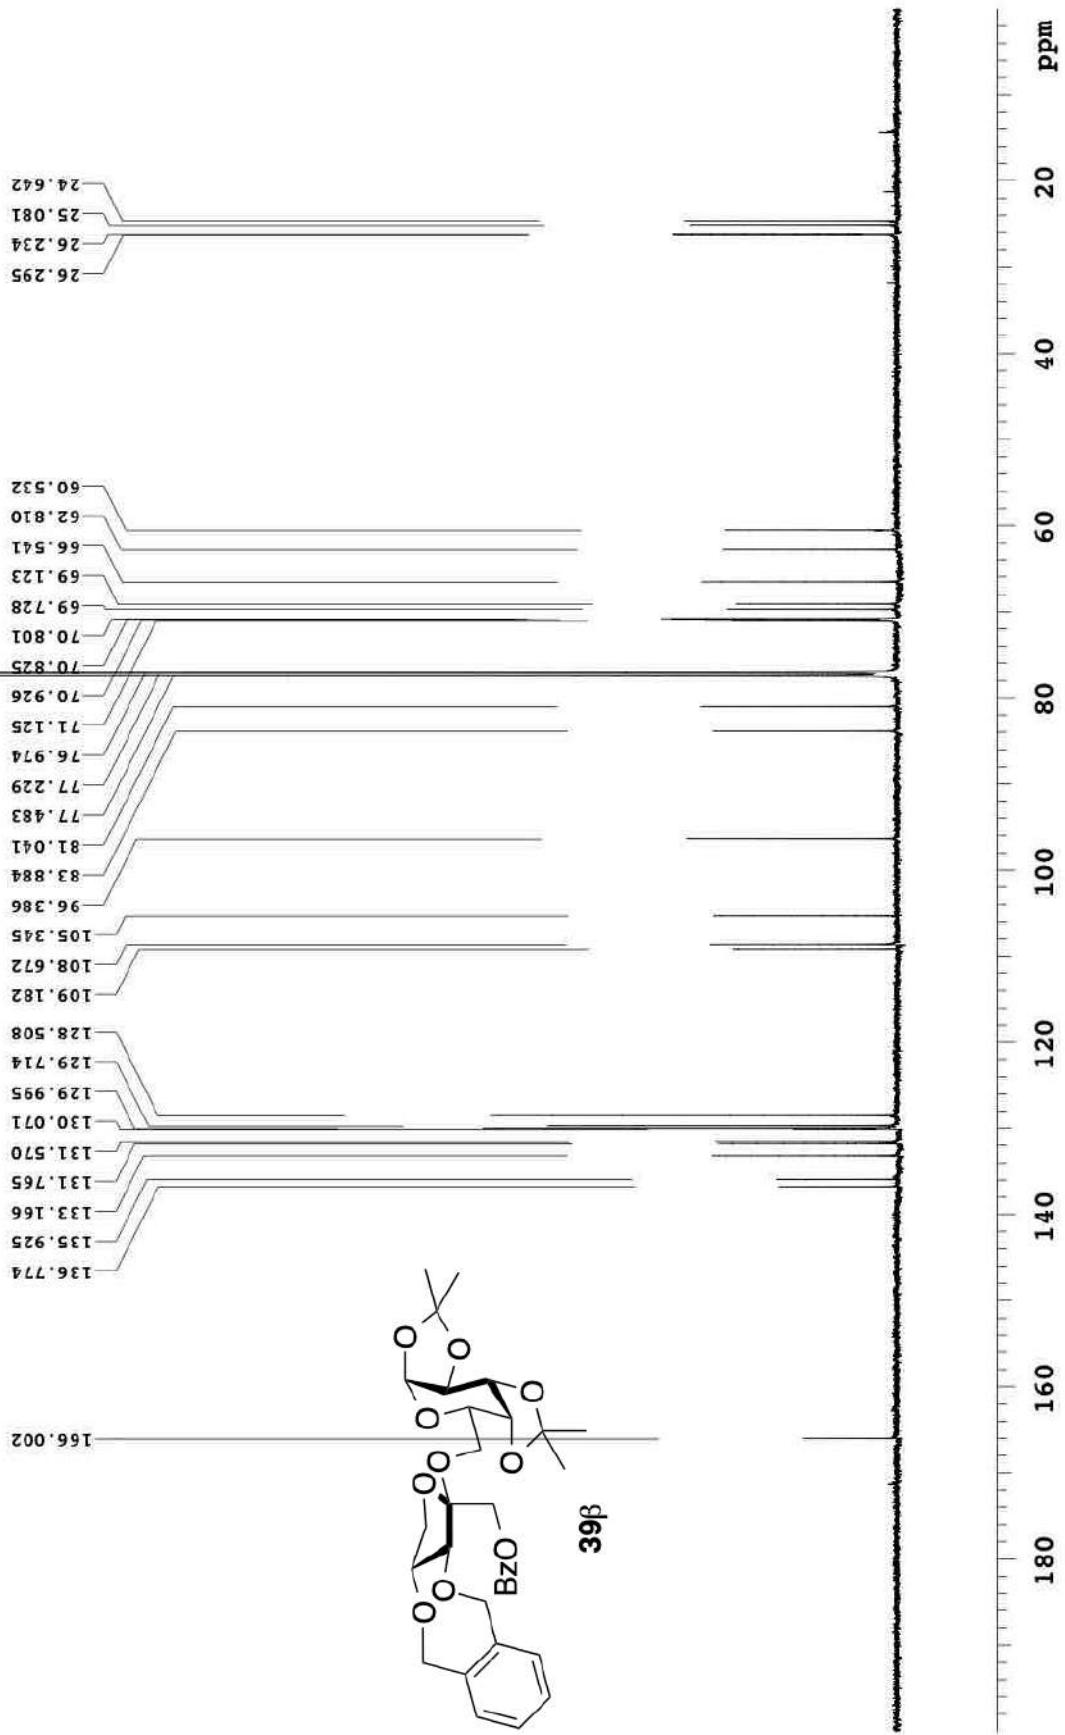

S162

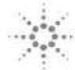

**Agilent Technologies**

Recorded on: **u500, Jan 26 2017** Sweep Width(Hz): **6009.62** Acquisition Time(s): **5** Relaxation Delay(s): **0.1**  
 Pulse Sequence: **PRESAT** Digital Res.(Hz/ppm): **0.09** Hz per mm(Hz/mm): **25.04** Completed Scans: **16**

Bo-Shun, Balli-XYL-083  
 499.797 MHz H1 1D in cdcl3 (ref. to CDC13 @ 7.26 ppm)  
 temp 27.7 C -> actual temp = 27.0 C, coldludal probe

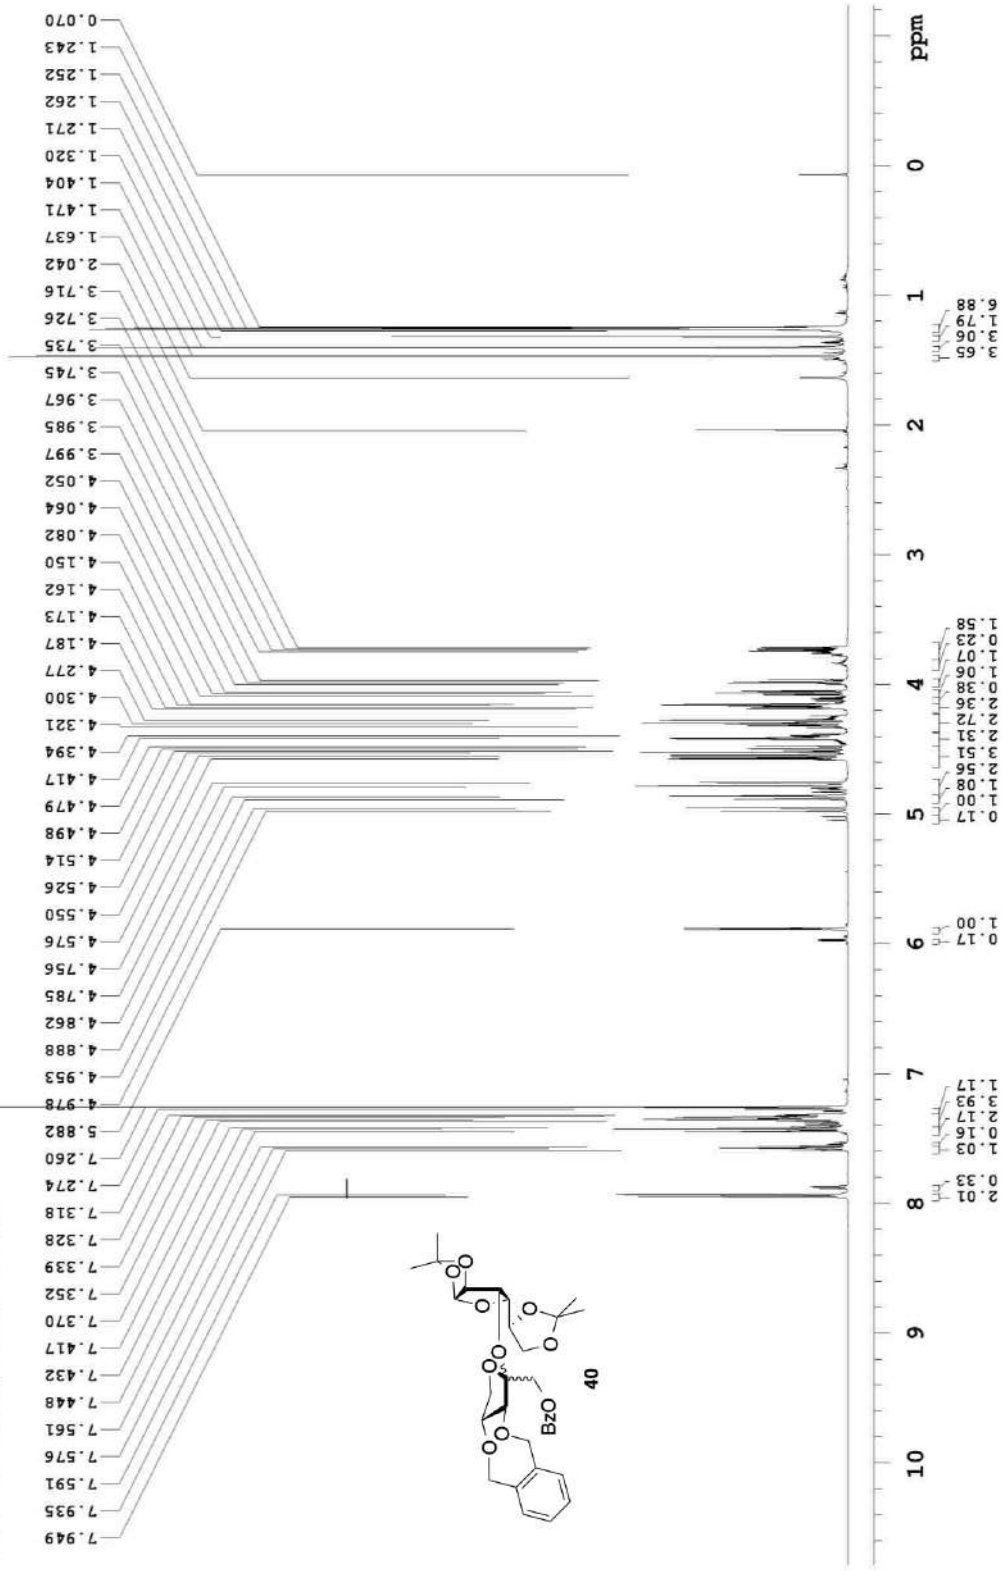

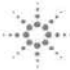

**Agilent Technologies**

Recorded on: **u500, Jan 26 2017** (Sweep Width(Hz): **33783.8** Acquisition Time(s): **1** Relaxation Delay(s): **1**  
 Pulse Sequence: **s2pul** Digital Res.(Hz/ppm): **0.25** Hz per mm(Hz/mm): **140.76** Completed Scans: **128**

Bo-Shun, Ball-XYL-083  
 125.688 MHz C13{H1} 1D in cdcl3 (ref. to CDC13 @ 77.06 ppm)  
 temp 27.7 C -> actual temp = 27.0 C, coldlual probe

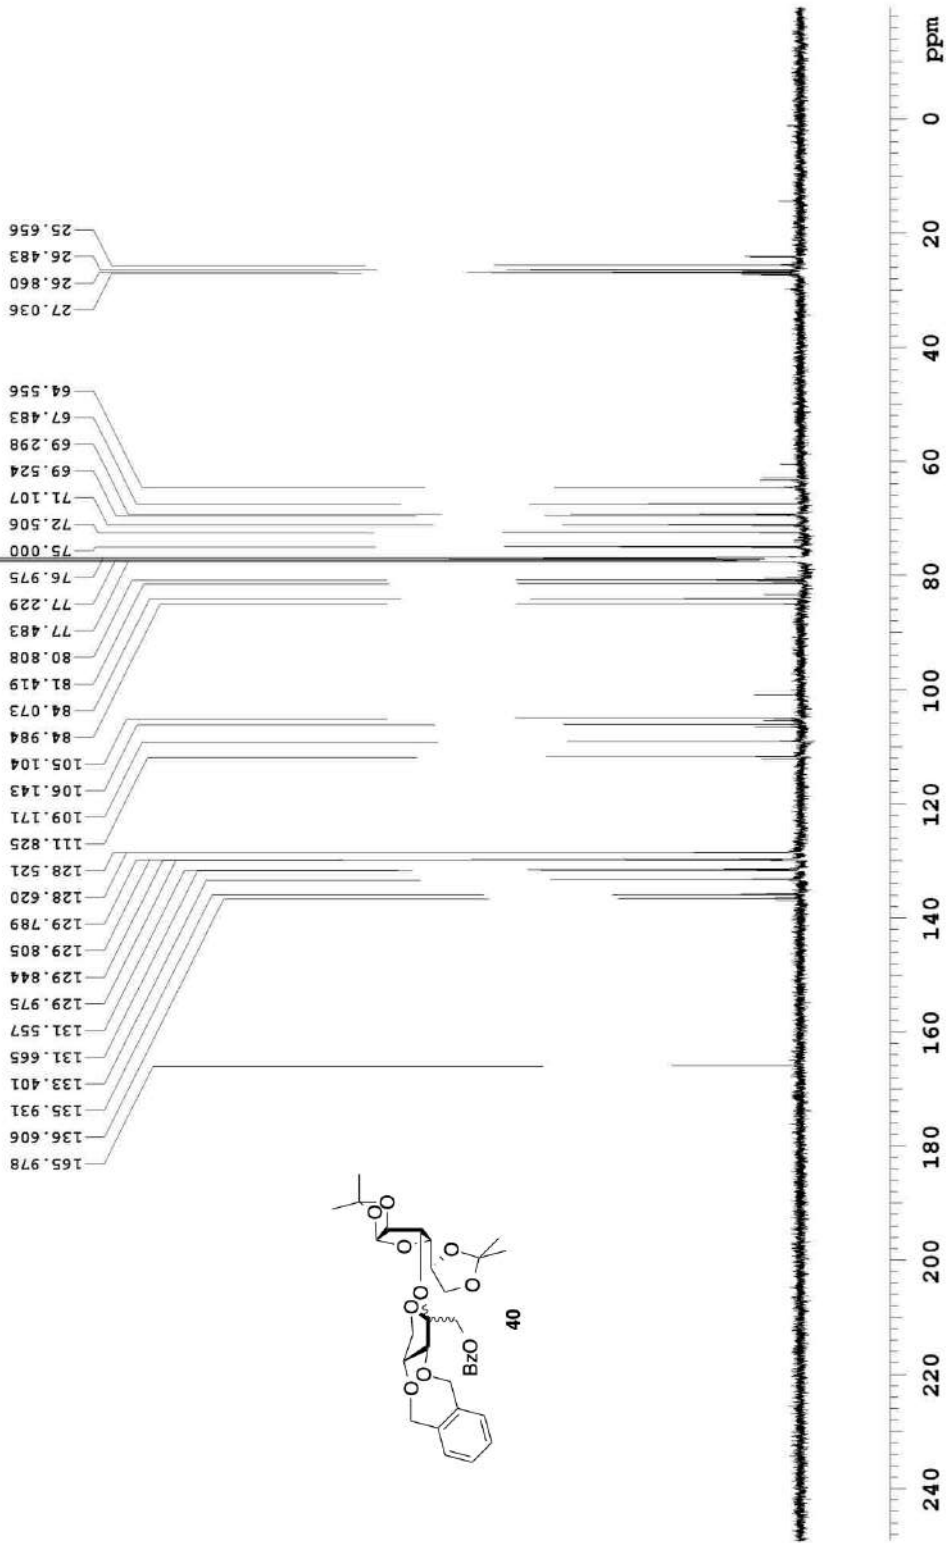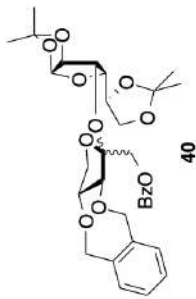







Recorded on: **u500, Apr 27 2017** Sweep Width(Hz): **6009.62** Acquisition Time(s): **5** Relaxation Delay(s): **0.1**  
 Pulse Sequence: **PRESAT** Digital Res.(Hz/ppm): **0.09** Hz per mm(Hz/mm): **22.91** Completed Scans: **16**

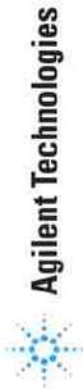

Bo-Shun, Ball-XYL-128-1  
 499.797 MHz H1 1D in cdcl3 (ref. to CDCl3 @ 7.26 ppm)  
 temp 27.7 C -> actual temp = 27.0 C, coldludal probe

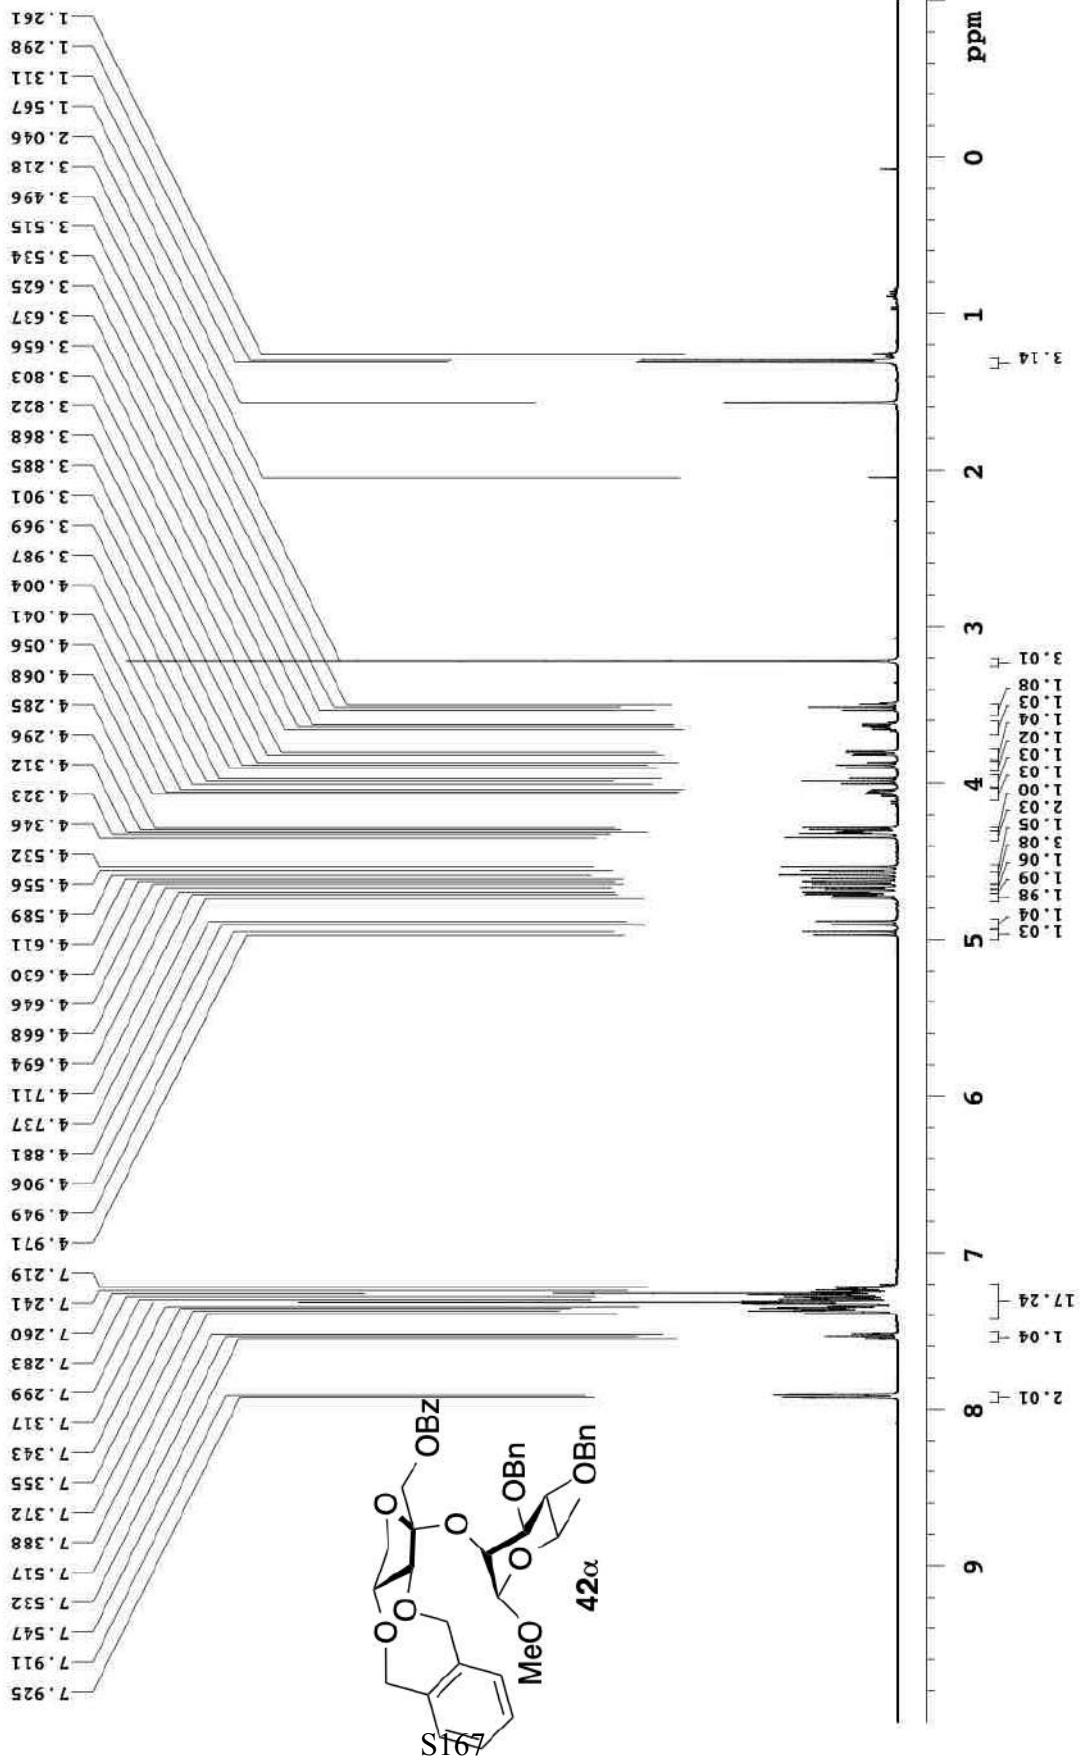

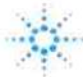

Department of Chemistry, University of Alberta

Relaxation Delay(s): 1  
Completed Scans 128

Acquisition Time(s): 1  
Hz per mm(Hz/mm): 109.9

Sweep Width(Hz): 33783.8  
Digital Res.(Hz/ppm): 0.26

Recorded on: u500, Apr 27 2017  
Pulse Sequence: s2pul

Bo-Shun, Ball-XYL-128-1  
125.688 MHz C13(H1) 1D in cdcl3 (ref. to CDC13 @ 77.06 ppm)  
temp 27.7 C -> actual temp = 27.0 C, coldidial probe

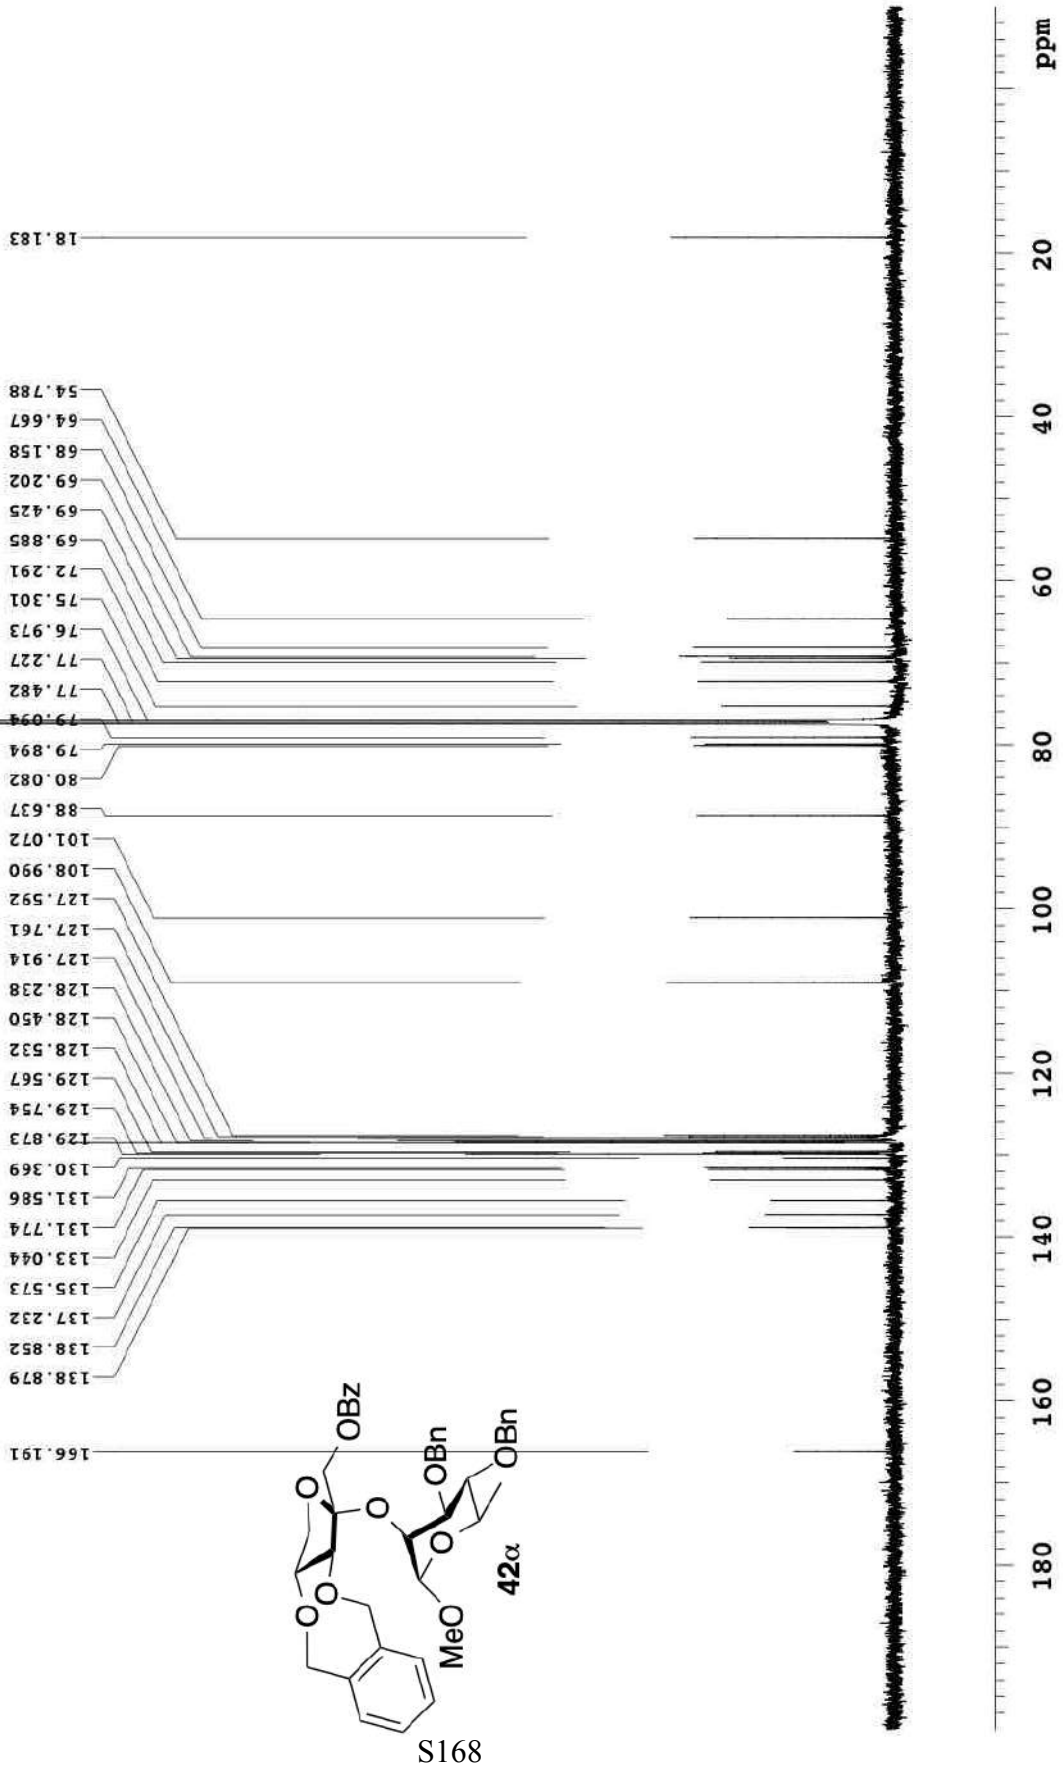

S168





Department of Chemistry, University of Alberta

Relaxation Delay(s): 1  
Completed Scans 128

Acquisition Time(s): 1  
Hz per mm(Hz/mm): 109.9

Sweep Width(Hz): 33783.8  
Digital Res.(Hz/pt): 0.26

Recorded on: u500, Apr 27 2017  
Pulse Sequence: s2pul

Bo-Shun, Ball-XYL-128-2  
125.688 MHz C13(H1) 1D in cdcl3 (ref. to CDCl3 @ 77.06 ppm)  
temp 27.7 C -> actual temp = 27.0 C, coldlial probe

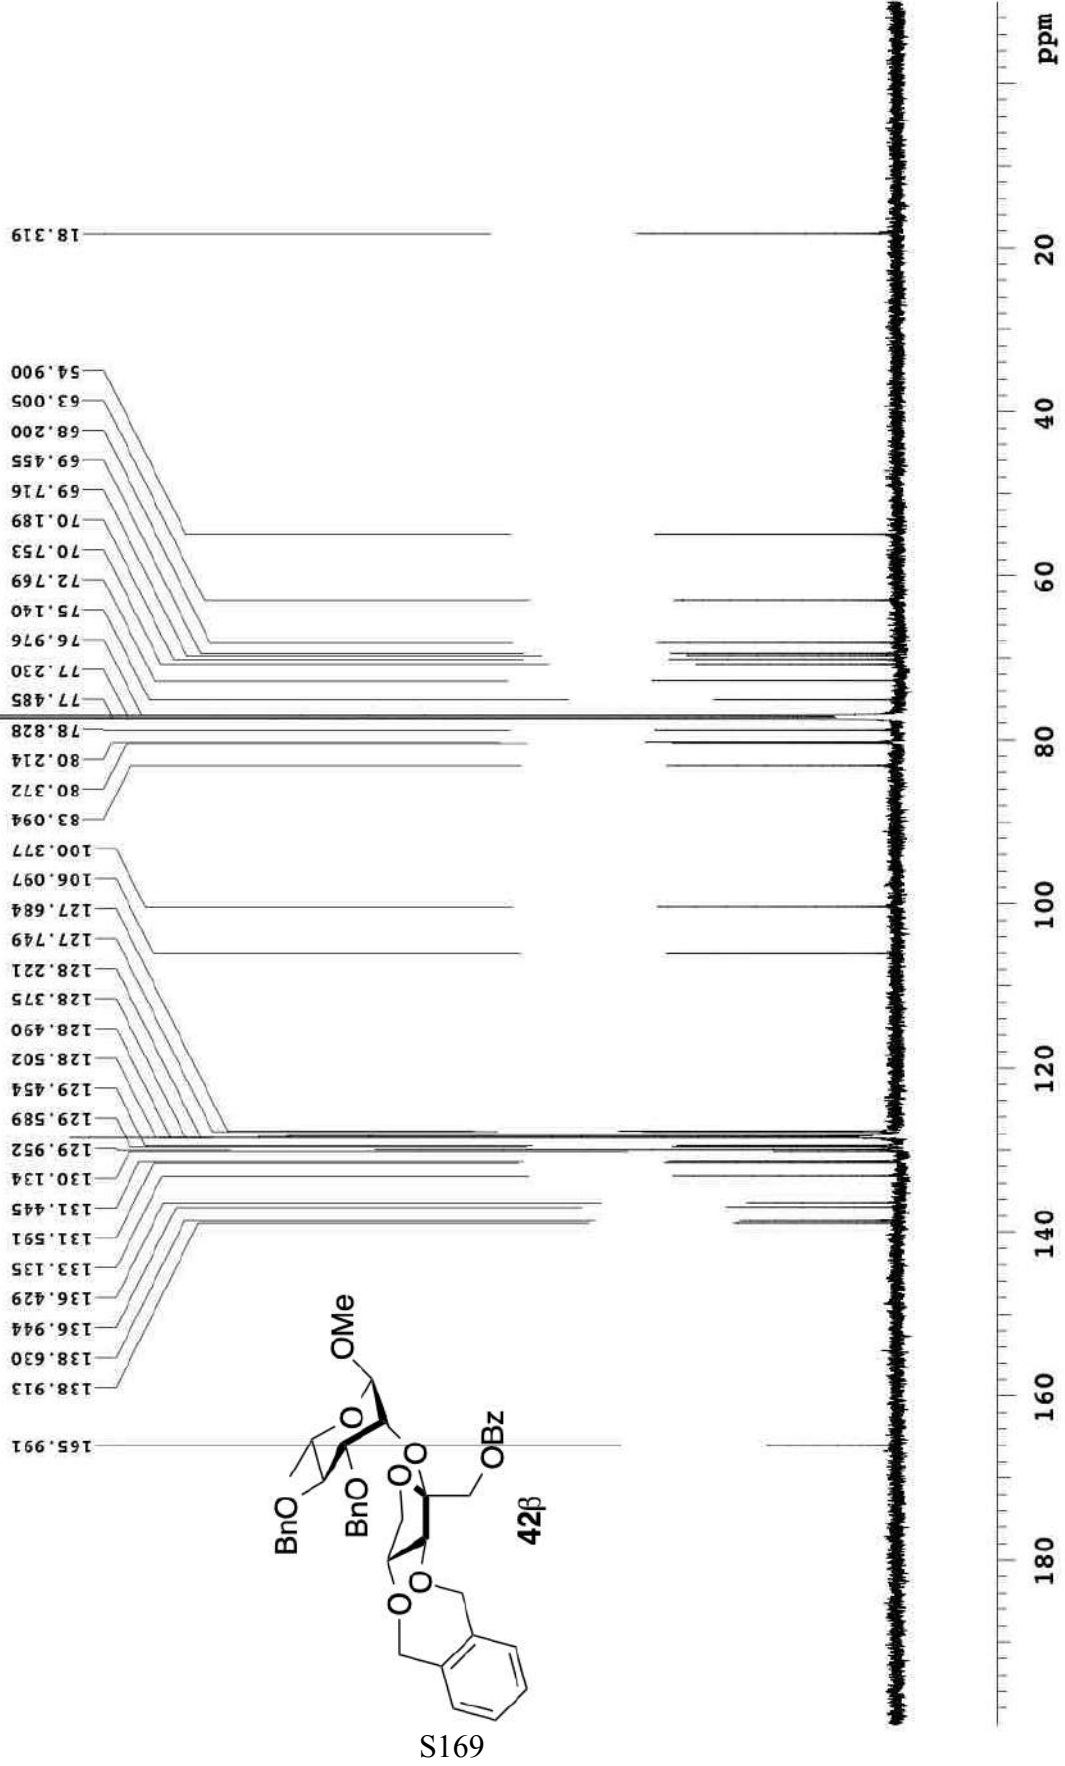

Bo-Shun, Ball-XYL-128-2  
 499.797 MHz H1 1D in cdcl3 (ref. to CDCl3 @ 7.26 ppm)  
 temp 27.7 C -> actual temp = 27.0 C, coldltdl probe

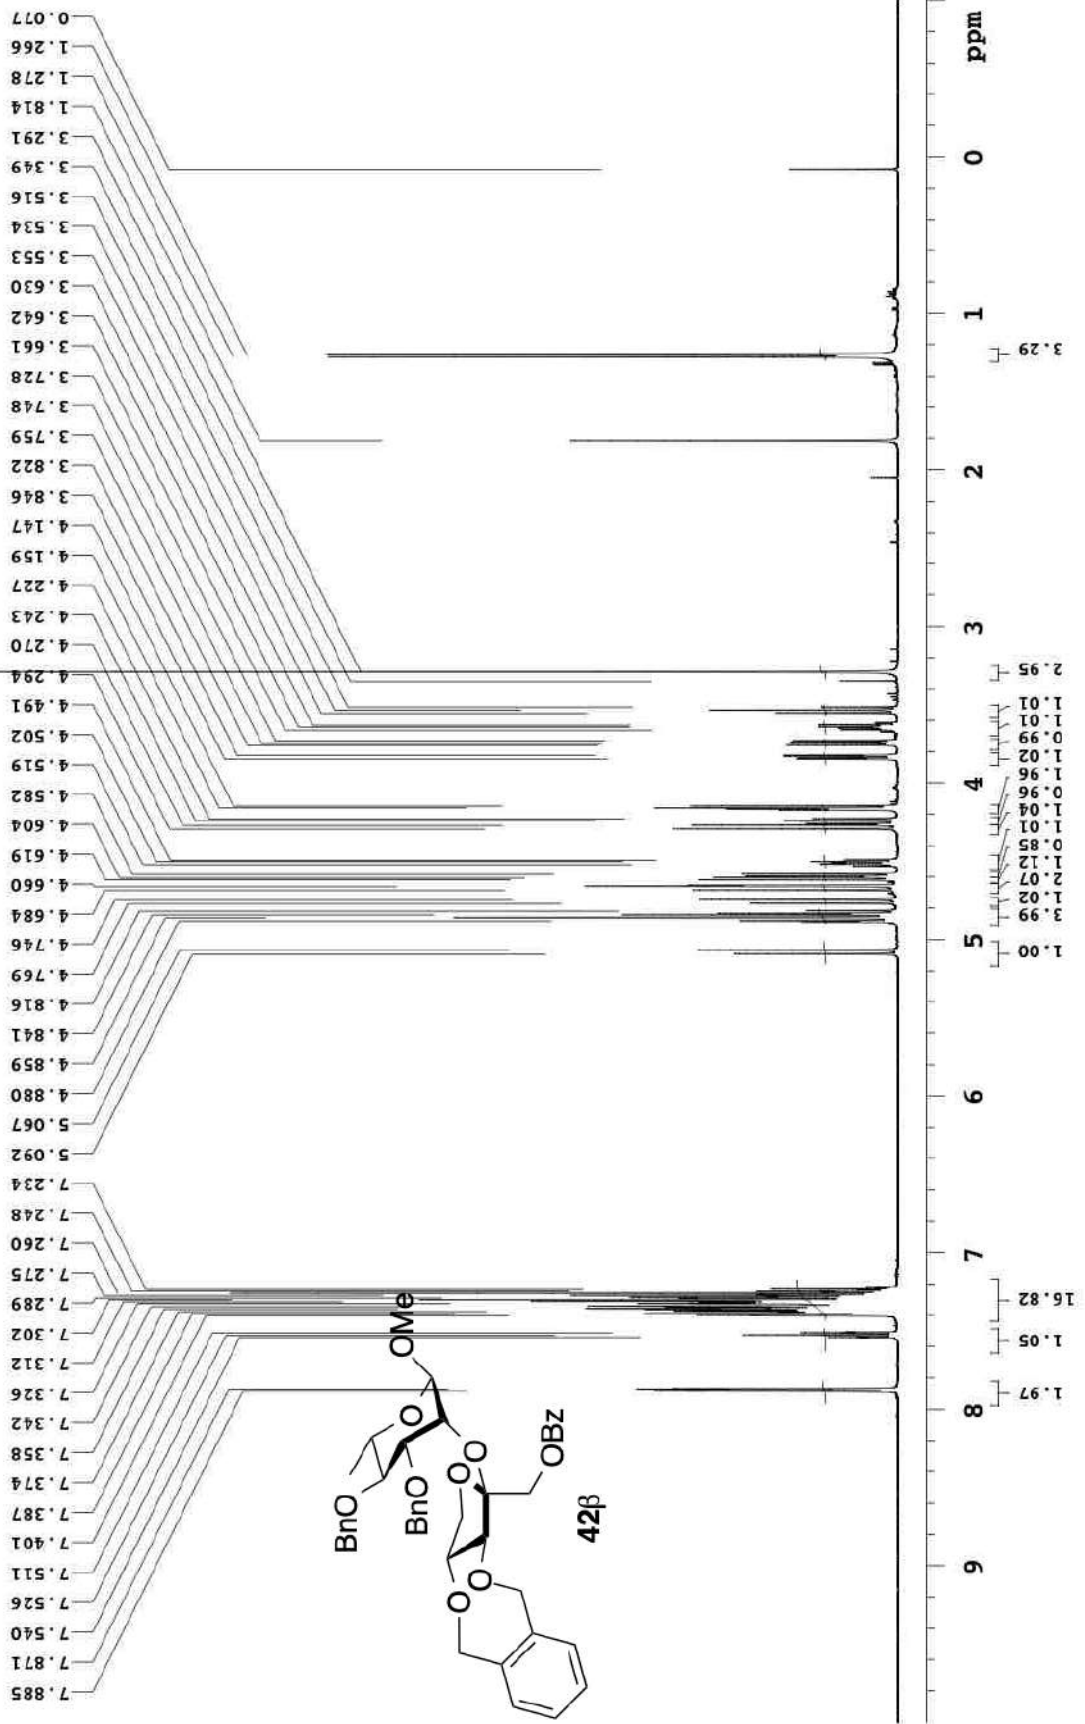

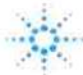

Bo-Shun, Ball-XYL-077-1  
499.797 MHz H1 1D in cdcl3 (ref. to CDCl3 @ 7.26 ppm)  
temp 27.7 C -> actual temp = 27.0 C, coldludal probe

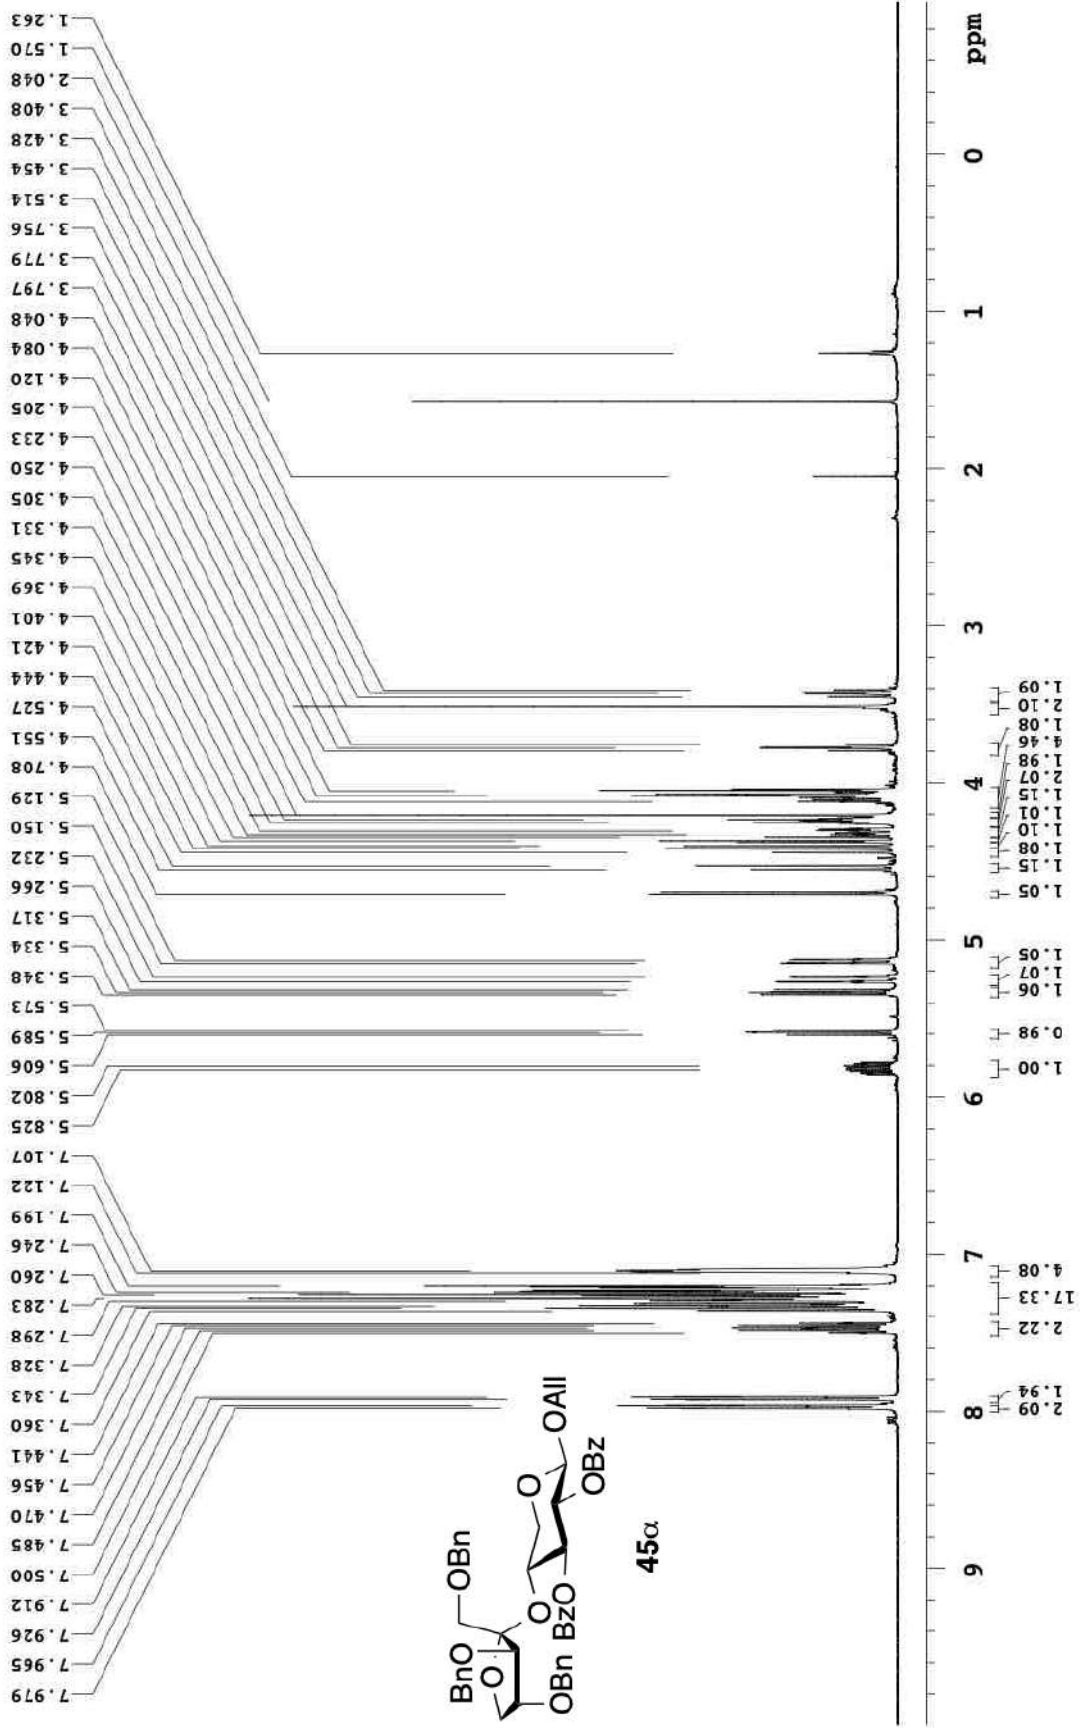

S171

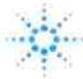

Department of Chemistry, University of Alberta

Relaxation Delay(s): 1  
Completed Scans 128

Acquisition Time(s): 1  
Hz per mm(Hz/mm): 109.81

Sweep Width(Hz): 33783.8  
Digital Res.(Hz/ppm): 0.26

Recorded on: u500, Jan 12 2017  
Pulse Sequence: s2pul

Bo-Shun, Ball-XYL-077-1  
125.688 MHz C13(H1) 1D in cdcl3 (ref. to CDCl3 @ 77.06 ppm)  
temp 27.7 C -> actual temp = 27.0 C, coldlial probe

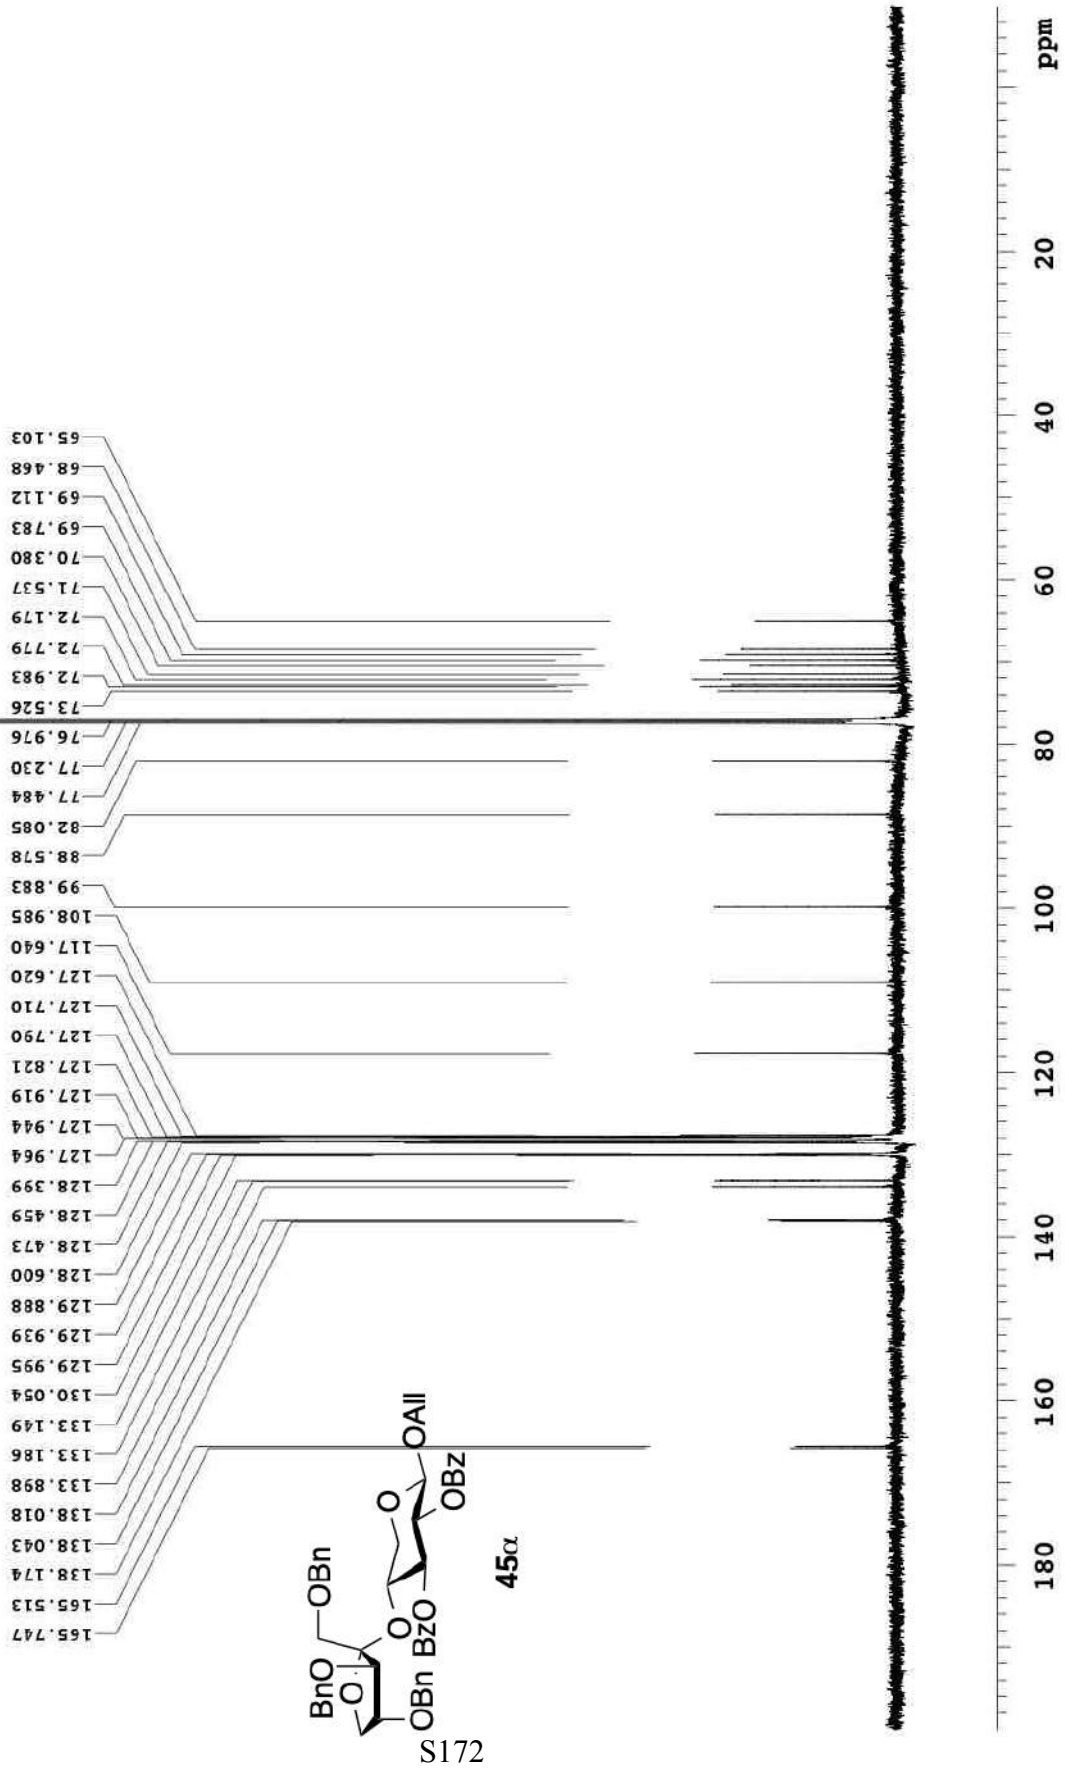





Bo-Shun, Ball-XYL-077-2  
125.688 MHz C13(H1) 1D in cdcl3 (ref. to CDC13 @ 77.06 ppm)  
temp 27.7 C -> actual temp = 27.0 C, coldlial probe

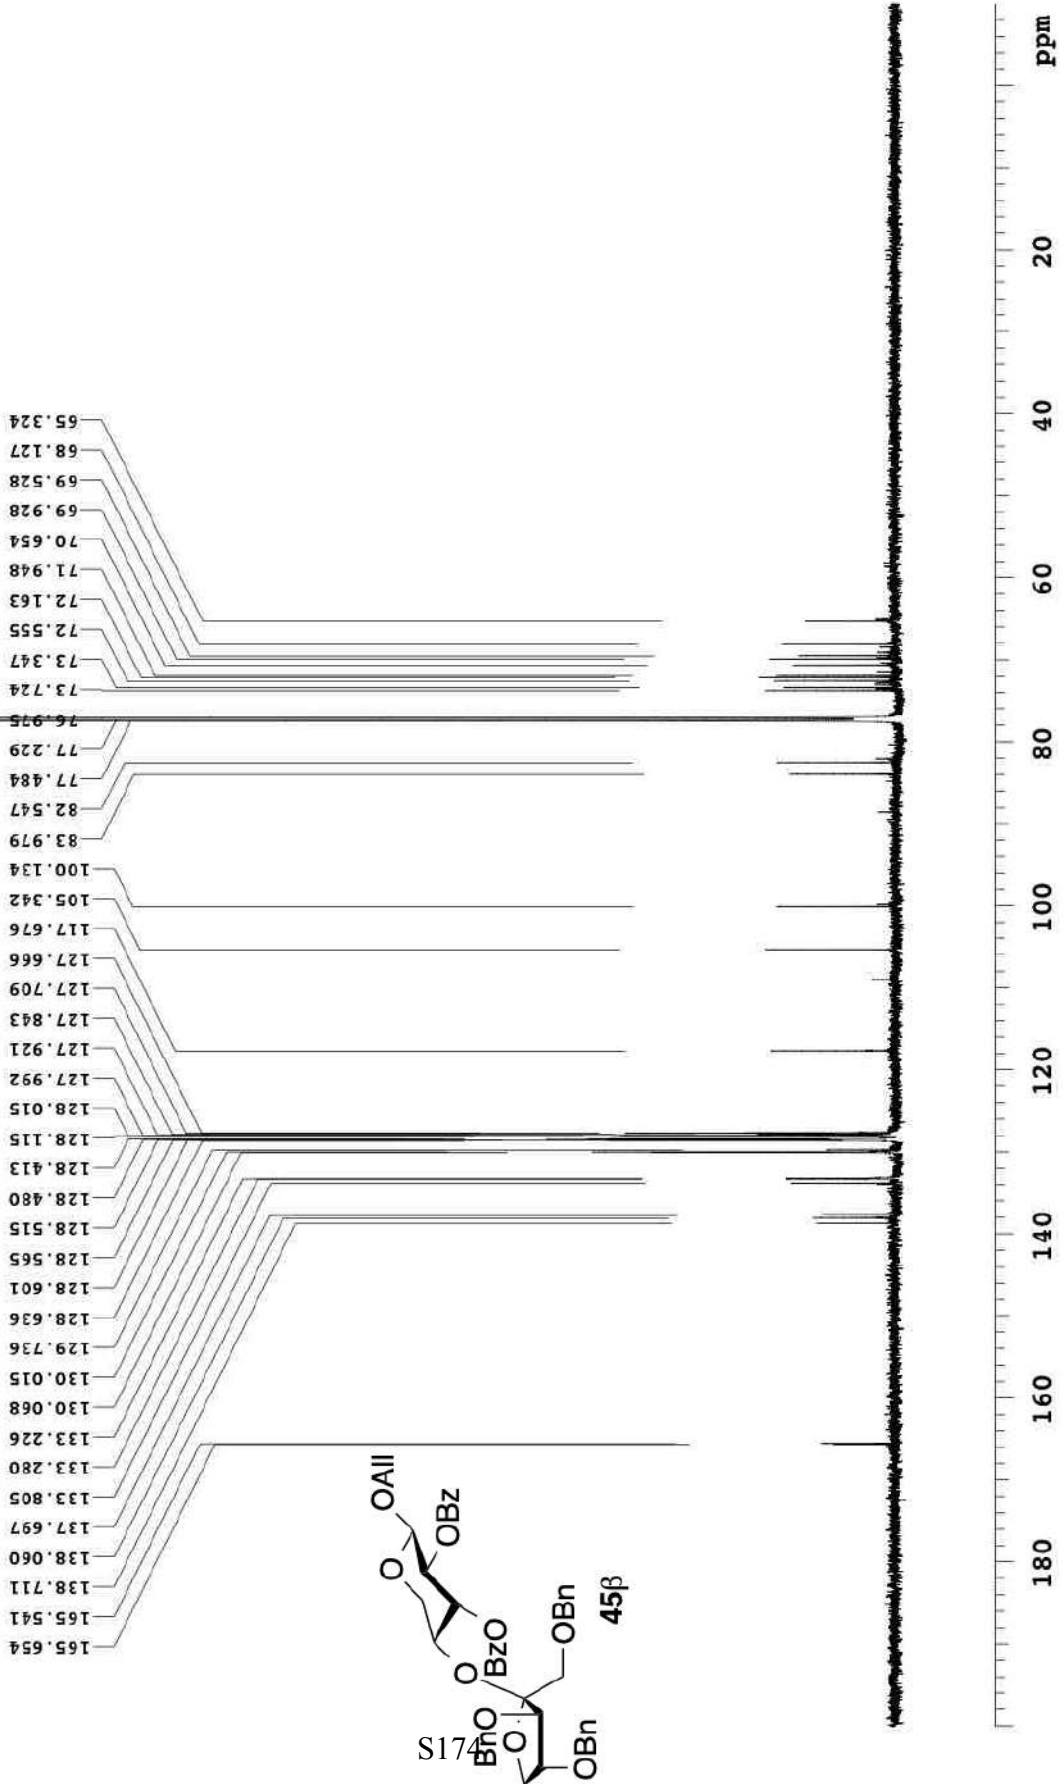







Department of Chemistry, University of Alberta

Recorded on: **v700, Sep 5 2018**  
Pulse Sequence: **s2pul**

Sweep Width(Hz): **48076.9**  
Digital Res.(Hz/ppm): **153.95**

Acquisition Time(s): **1**  
Hz per mm(Hz/mm): **153.95**

Relaxation Delay(s): **1**  
Completed Scans: **255**

Bo-Shun, BalI-XYL-072  
175.975 MHz C13(H1) 1D in cdcl3 (ref. to CDCl3 @ 77.06 ppm)  
temp 27.5 C -> actual temp = 27.0 C, coldid probe

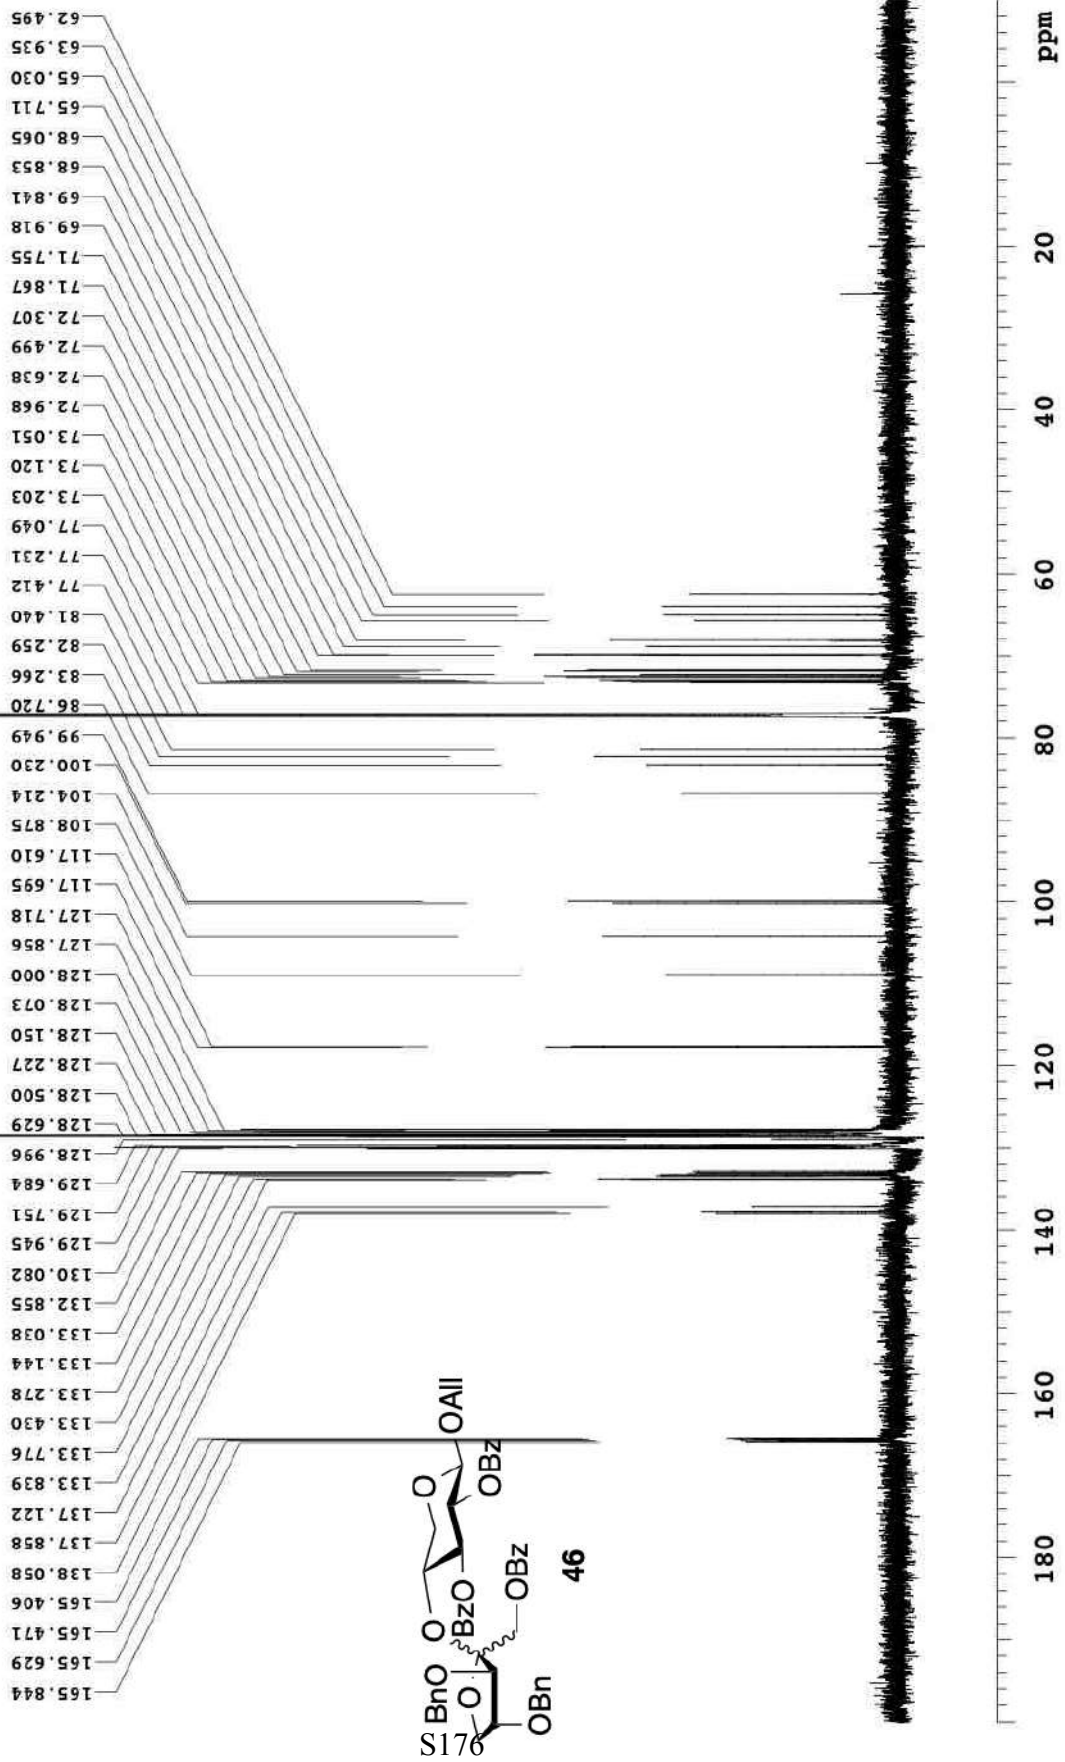

Bo-Shun, Ball-XYL-133-1  
 499.797 MHz H1 1D in cdcl3 (ref. to CDCl3 @ 7.26 ppm)  
 temp 27.7 C -> actual temp = 27.0 C, coldlidal probe

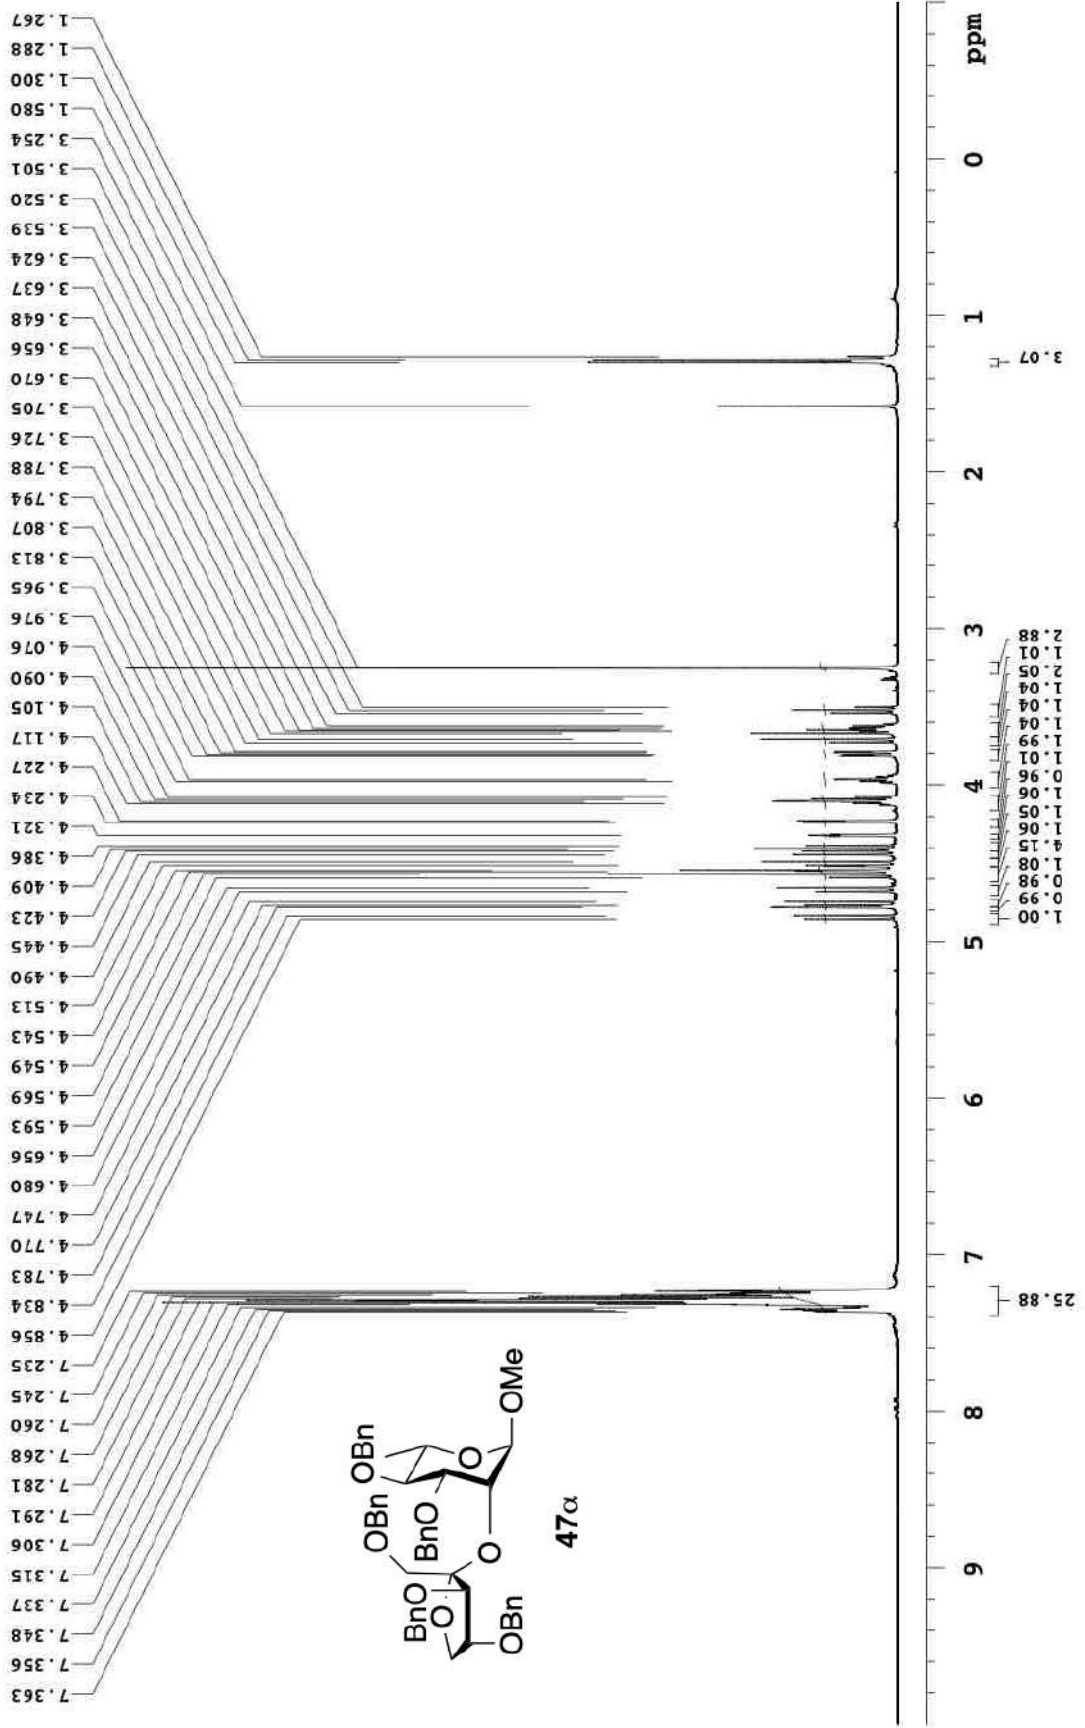



Recorded on: **u500, May 6 2017**    Sweep Width(Hz): **33783.8**    Acquisition Time(s): **1**    Relaxation Delay(s): **1**  
Pulse Sequence: **s2pul**    Digital Res.(Hz/pp): **0.26**    Hz per mm(Hz/mm): **109.99**    Completed Scans: **128**

Bo-Shun, Ball-XYL-133-1  
125.688 MHz C13(H1) 1D in cdcl3 (ref. to CDC13 @ 77.06 ppm)  
temp 27.7 C -> actual temp = 27.0 C, coldlial probe

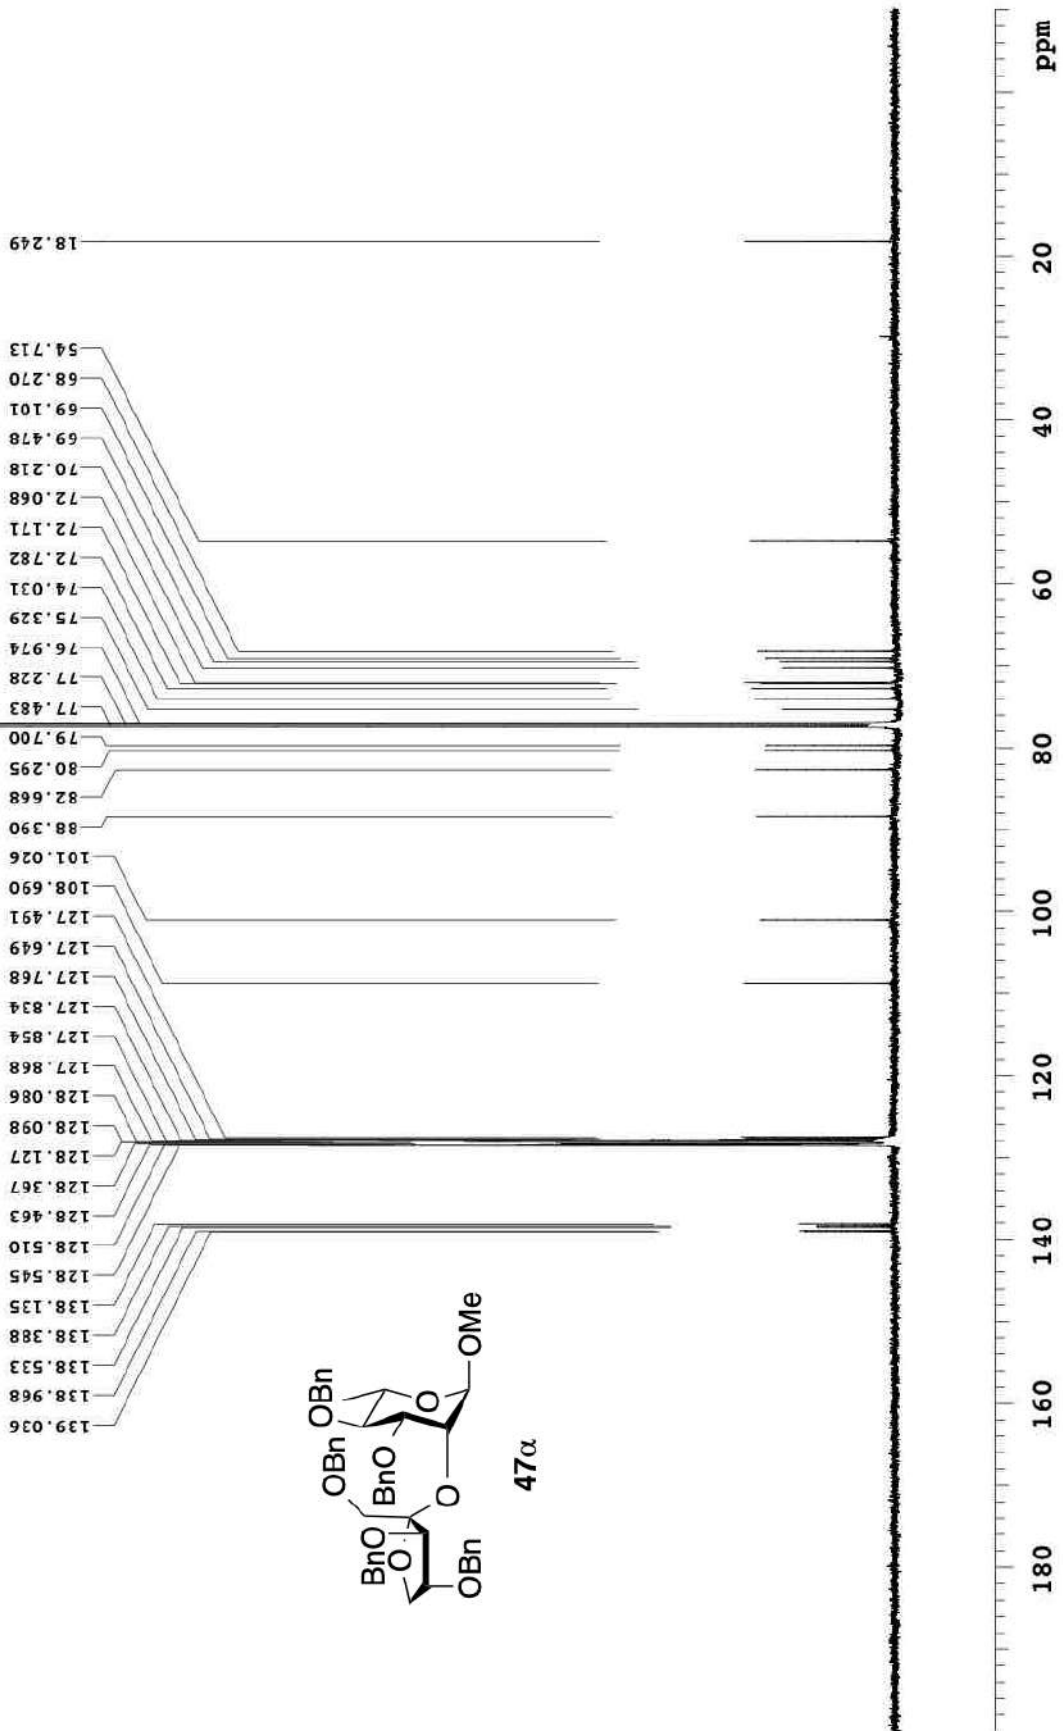





Recorded on: **u500, May 6 2017**      Sweep Width(Hz): **33783.8**      Acquisition Time(s): **1**      Relaxation Delay(s): **1**  
 Pulse Sequence: **s2pul**      Digital Res.(Hz/pt): **0.26**      Hz per mm(Hz/mm): **109.9**      Completed Scans: **128**

Bo-Shun, Ball-XYL-133-2  
 125.688 MHz C13(H1) 1D in cdcl3 (ref. to CDC13 @ 77.06 ppm)  
 temp 27.7 C -> actual temp = 27.0 C, coldlial probe

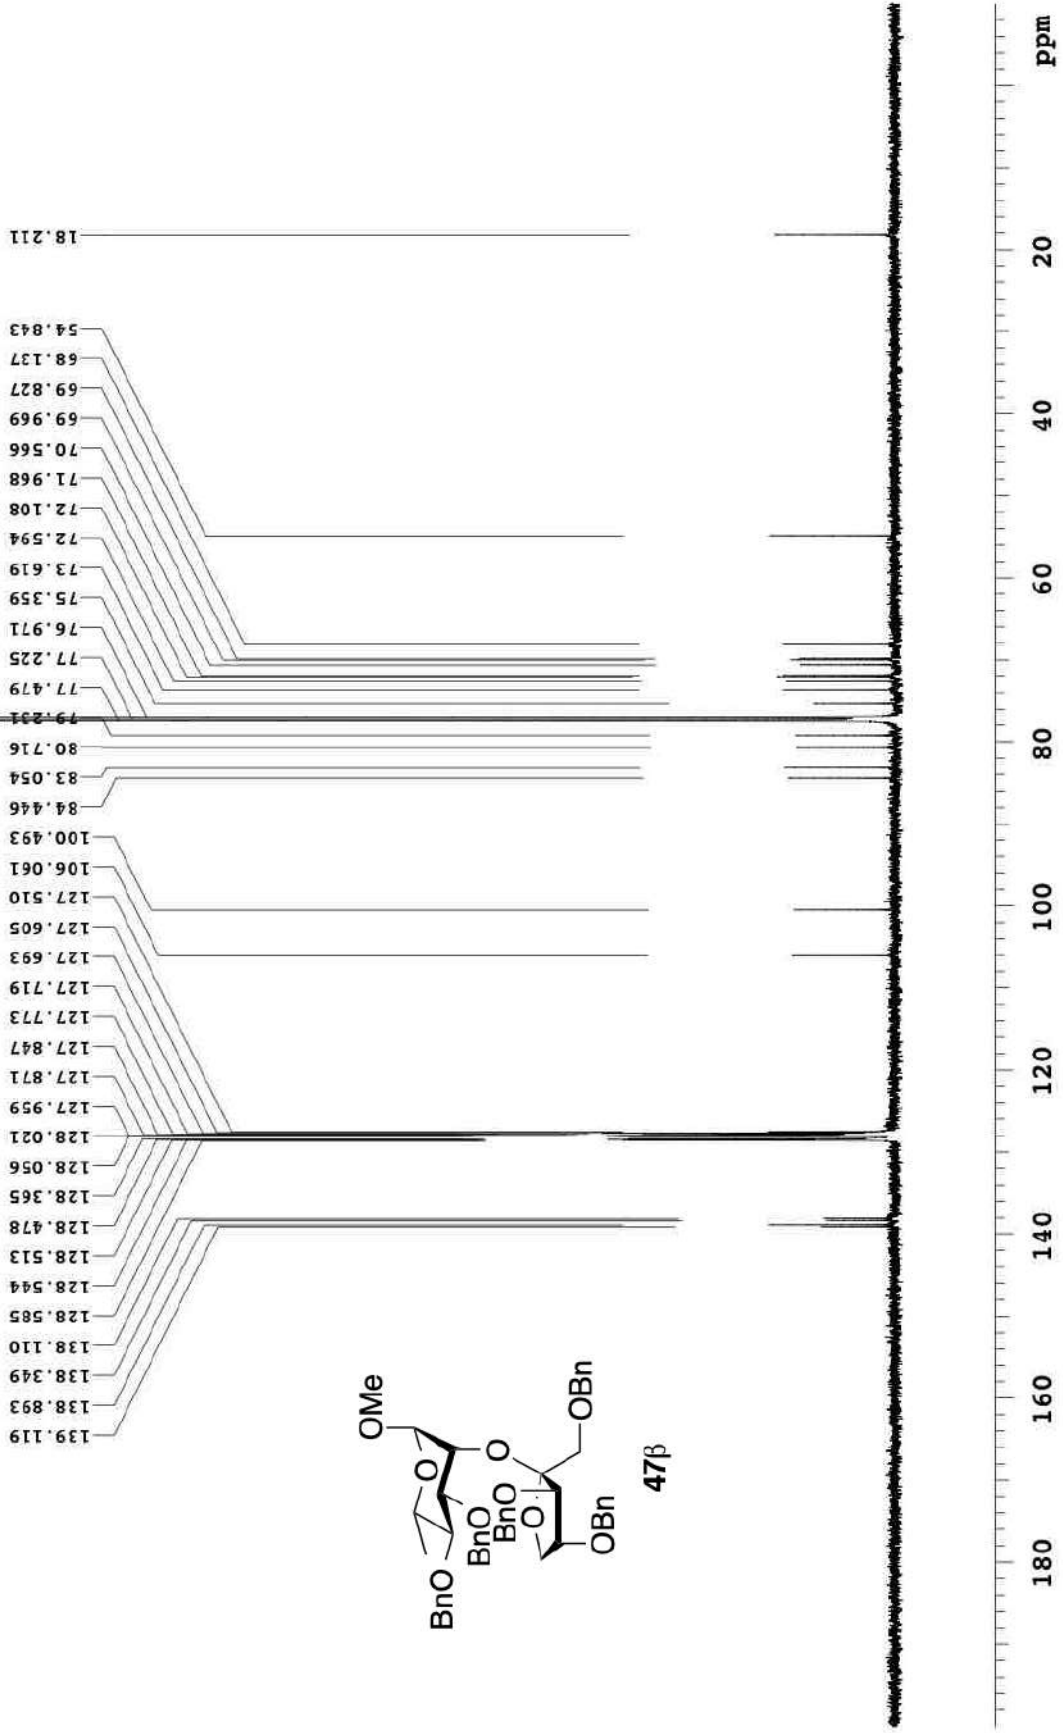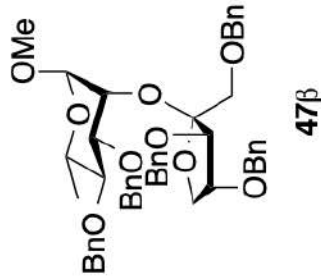





Recorded on: **u500, May 3 2017** Sweep Width(Hz): **6009.62** Acquisition Time(s): **5** Relaxation Delay(s): **0.1**  
Pulse Sequence: **PRESAT** Digital Res.(Hz/mm): **0.09** Hz per mm(Hz/mm): **22.91** Completed Scans: **16**

Bo-Shun, Ball-XYL-131  
499.797 MHz H1 1D in cdcl3 (ref. to CDC13 @ 7.26 ppm)  
temp 27.7 C -> actual temp = 27.0 C, coldludal probe

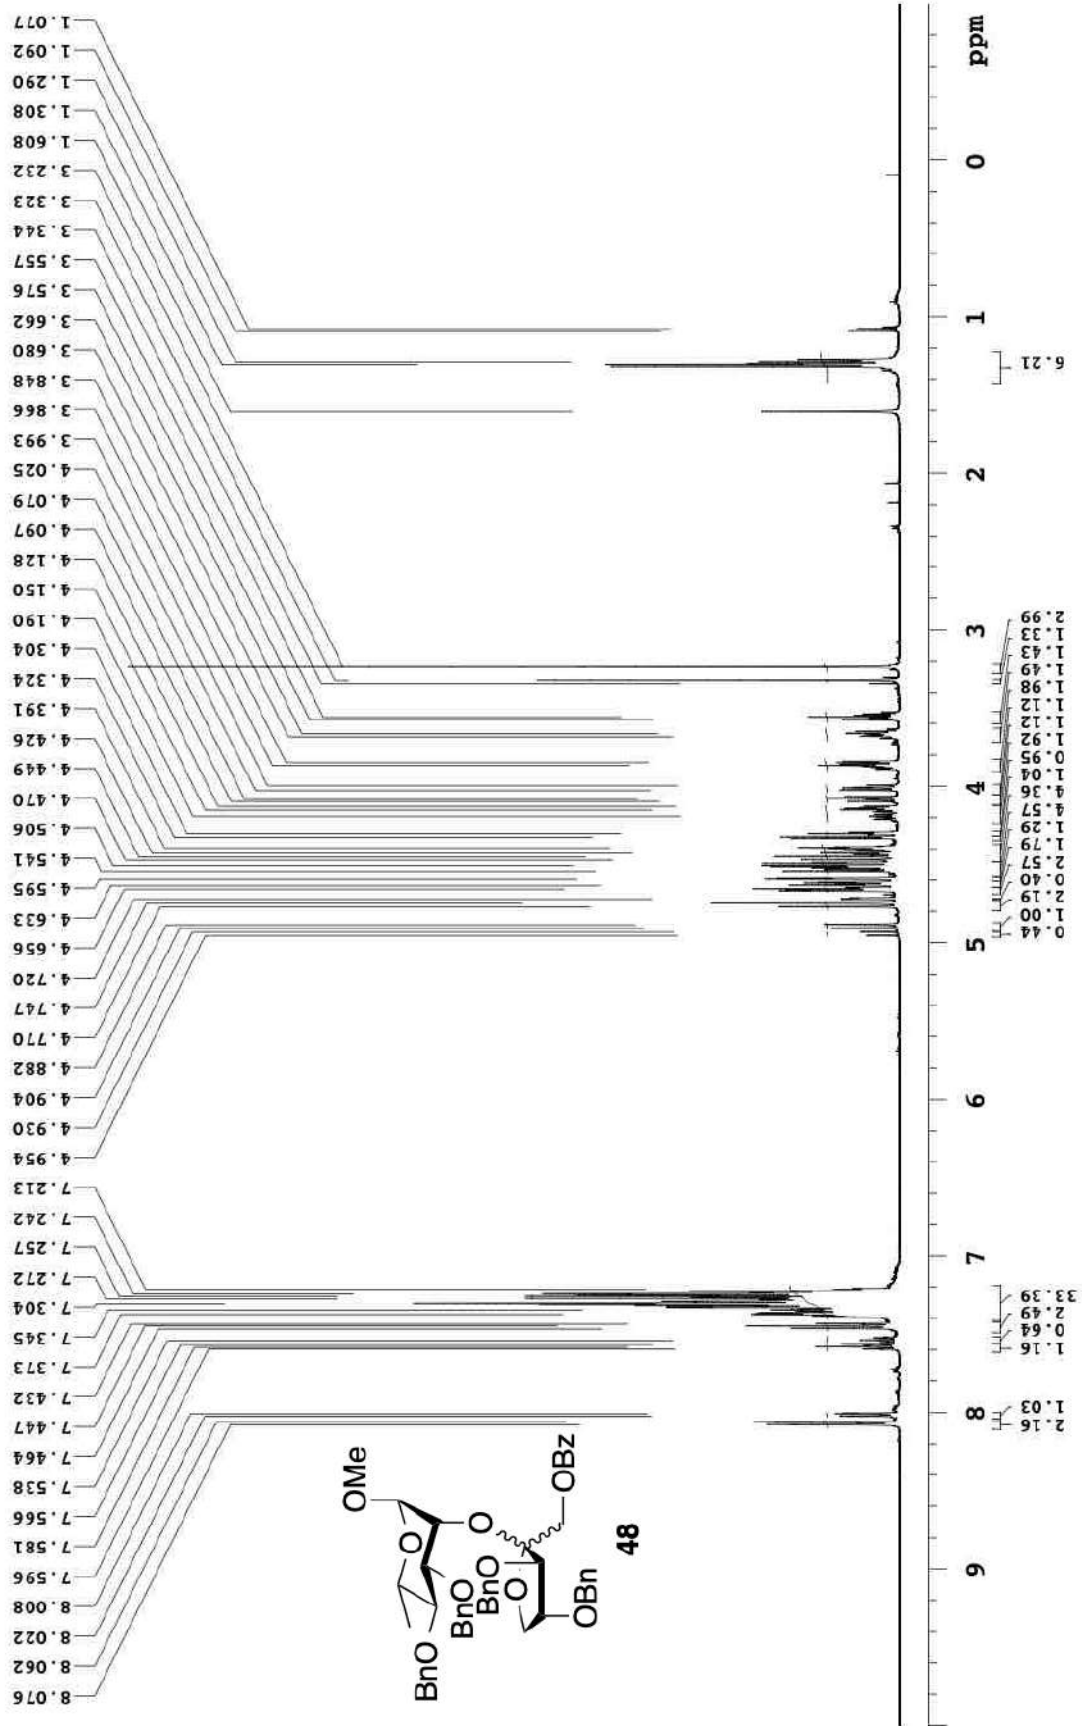

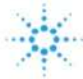

Recorded on: **u500, May 3 2017**      Sweep Width(Hz): **33783.8**      Relaxation Delay(s): **1**  
Pulse Sequence: **s2pul**      Digital Res.(Hz/pt): **0.26**      Acquisition Time(s): **1**      Completed Scans: **128**  
Hz per mm(Hz/mm): **109.9**

Bo-Shun, Ball-XYL-131  
125.688 MHz C13(H1) 1D in cdcl3 (ref. to CDC13 @ 77.06 ppm)  
temp 27.7 C -> actual temp = 27.0 C; coldlial probe

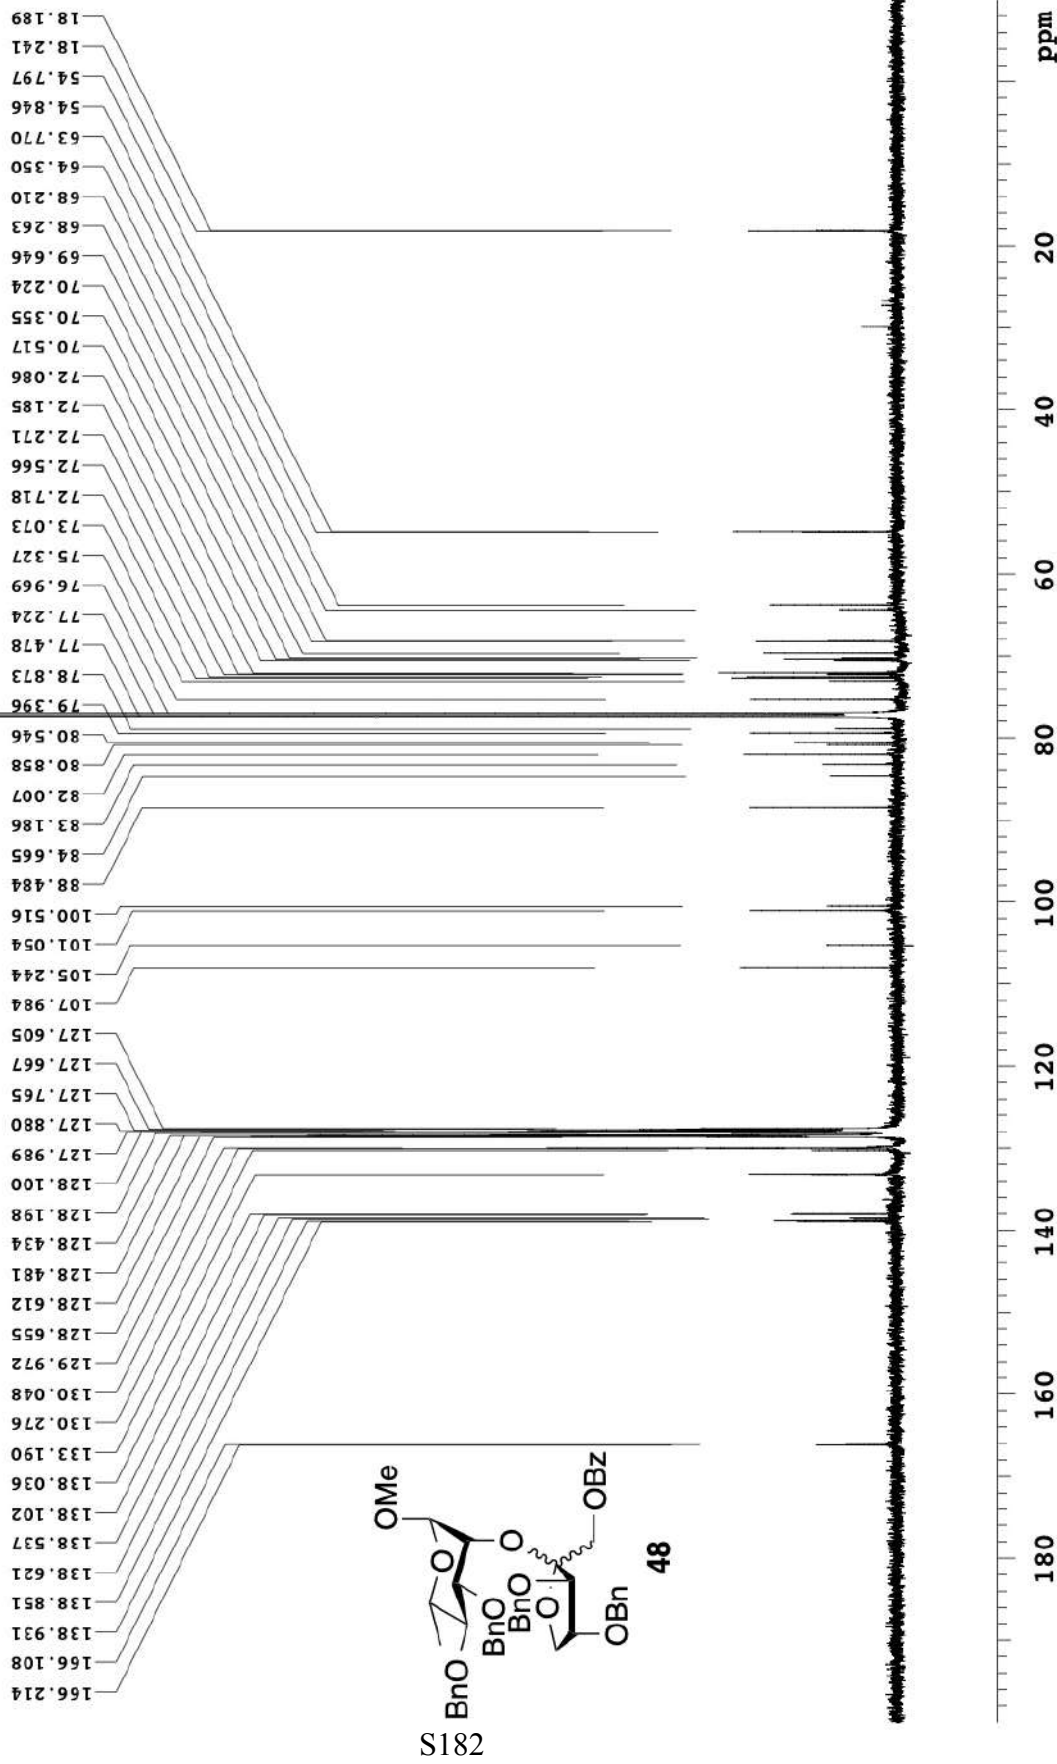

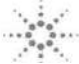

# Agilent Technologies

Department of Chemistry, University of Alberta

Recorded on: **u500, Mar 20 2017**  
Pulse Sequence: **PRESAT**

Sweep Width(Hz): **6009.62**  
Digital Res.(Hz/pt): **0.09**

Acquisition Time(s): **5**  
Hz per mm(Hz/mm): **25.04**

Relaxation Delay(s): **0.1**  
Completed Scans: **16**

ihun, Balli-XYL-115  
797 MHz H1 1D in cdcl3 (ref. to CDC13 @ 7.26 ppm)  
1 27.7 C -> actual temp = 27.0 C, coldlual probe

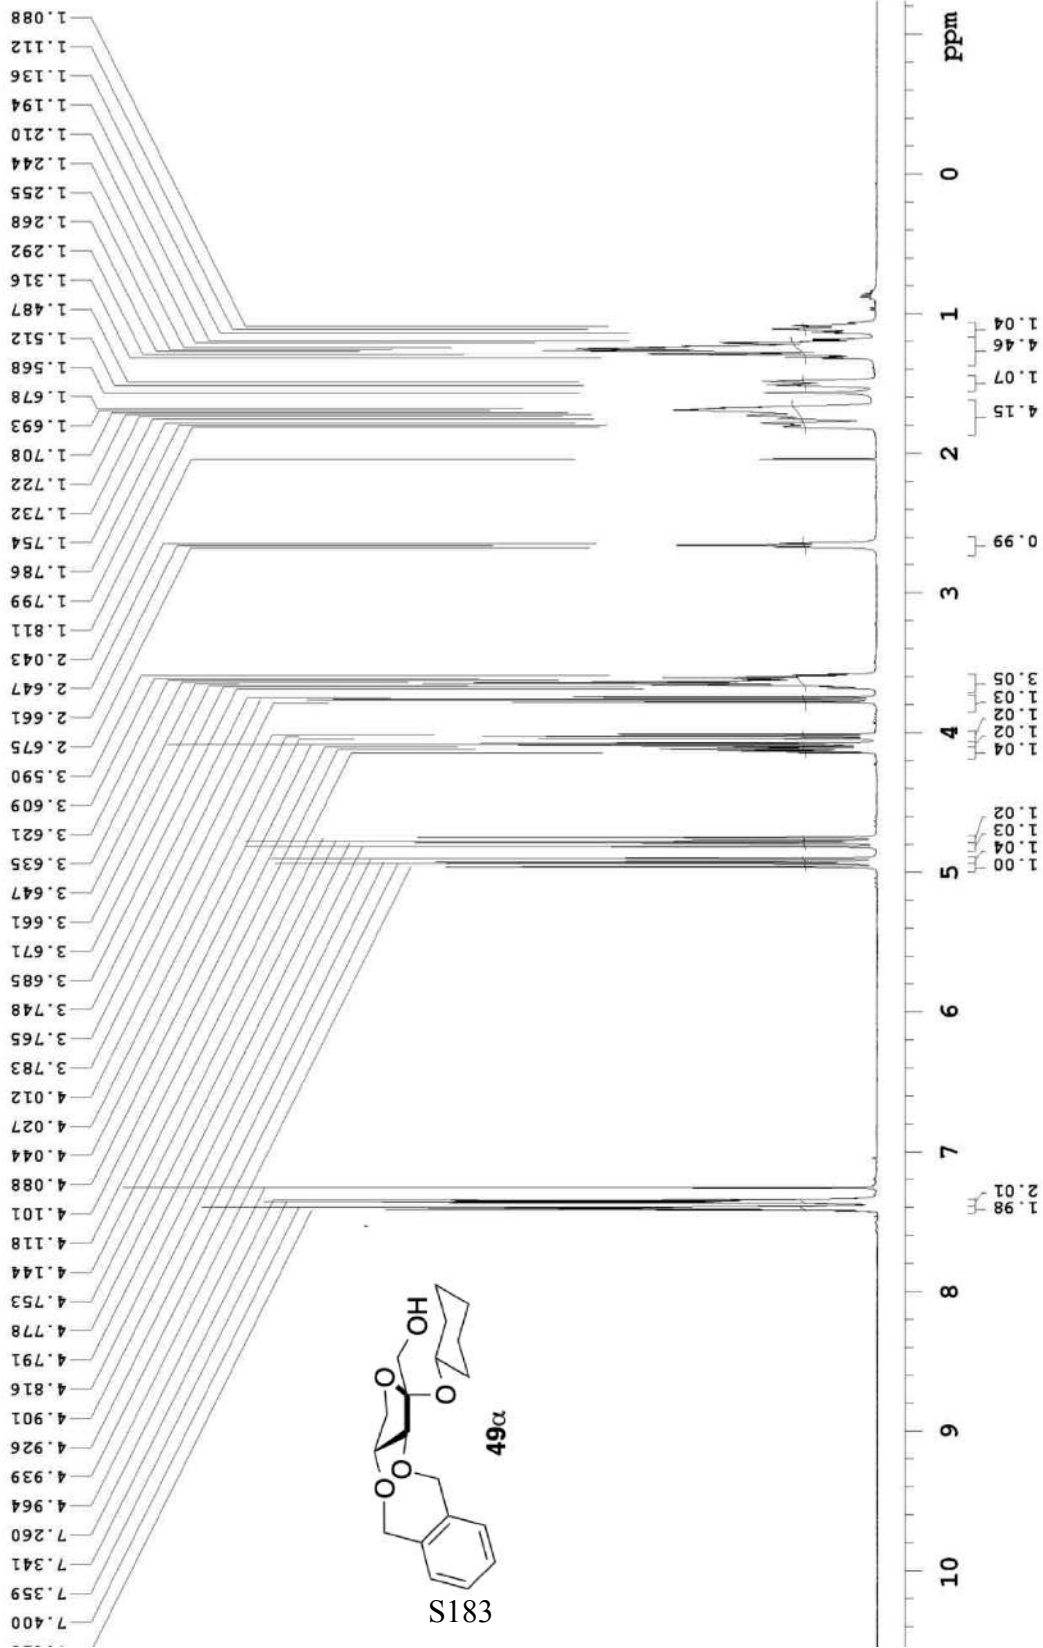

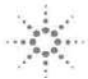

# Agilent Technologies

Recorded on: **u500, Mar 20 2017**    Sweep Width(Hz): **33753.8**    Acquisition Time(s): **1**    Relaxation Delay(s): **1**  
 Pulse Sequence: **s2pul**    Digital Res. (Hz/pt): **0.25**    Hz per mm(Hz/mm): **140.76**    Completed Scans: **128**

Shun, Ball-XYL-115  
 .688 MHz C13{H1} 1D in cdcl3 (ref. to CDC13 @ 77.06 ppm)  
 p 27.7 C -> actual temp = 27.0 C, coldlial probe

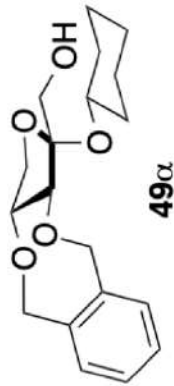

S184

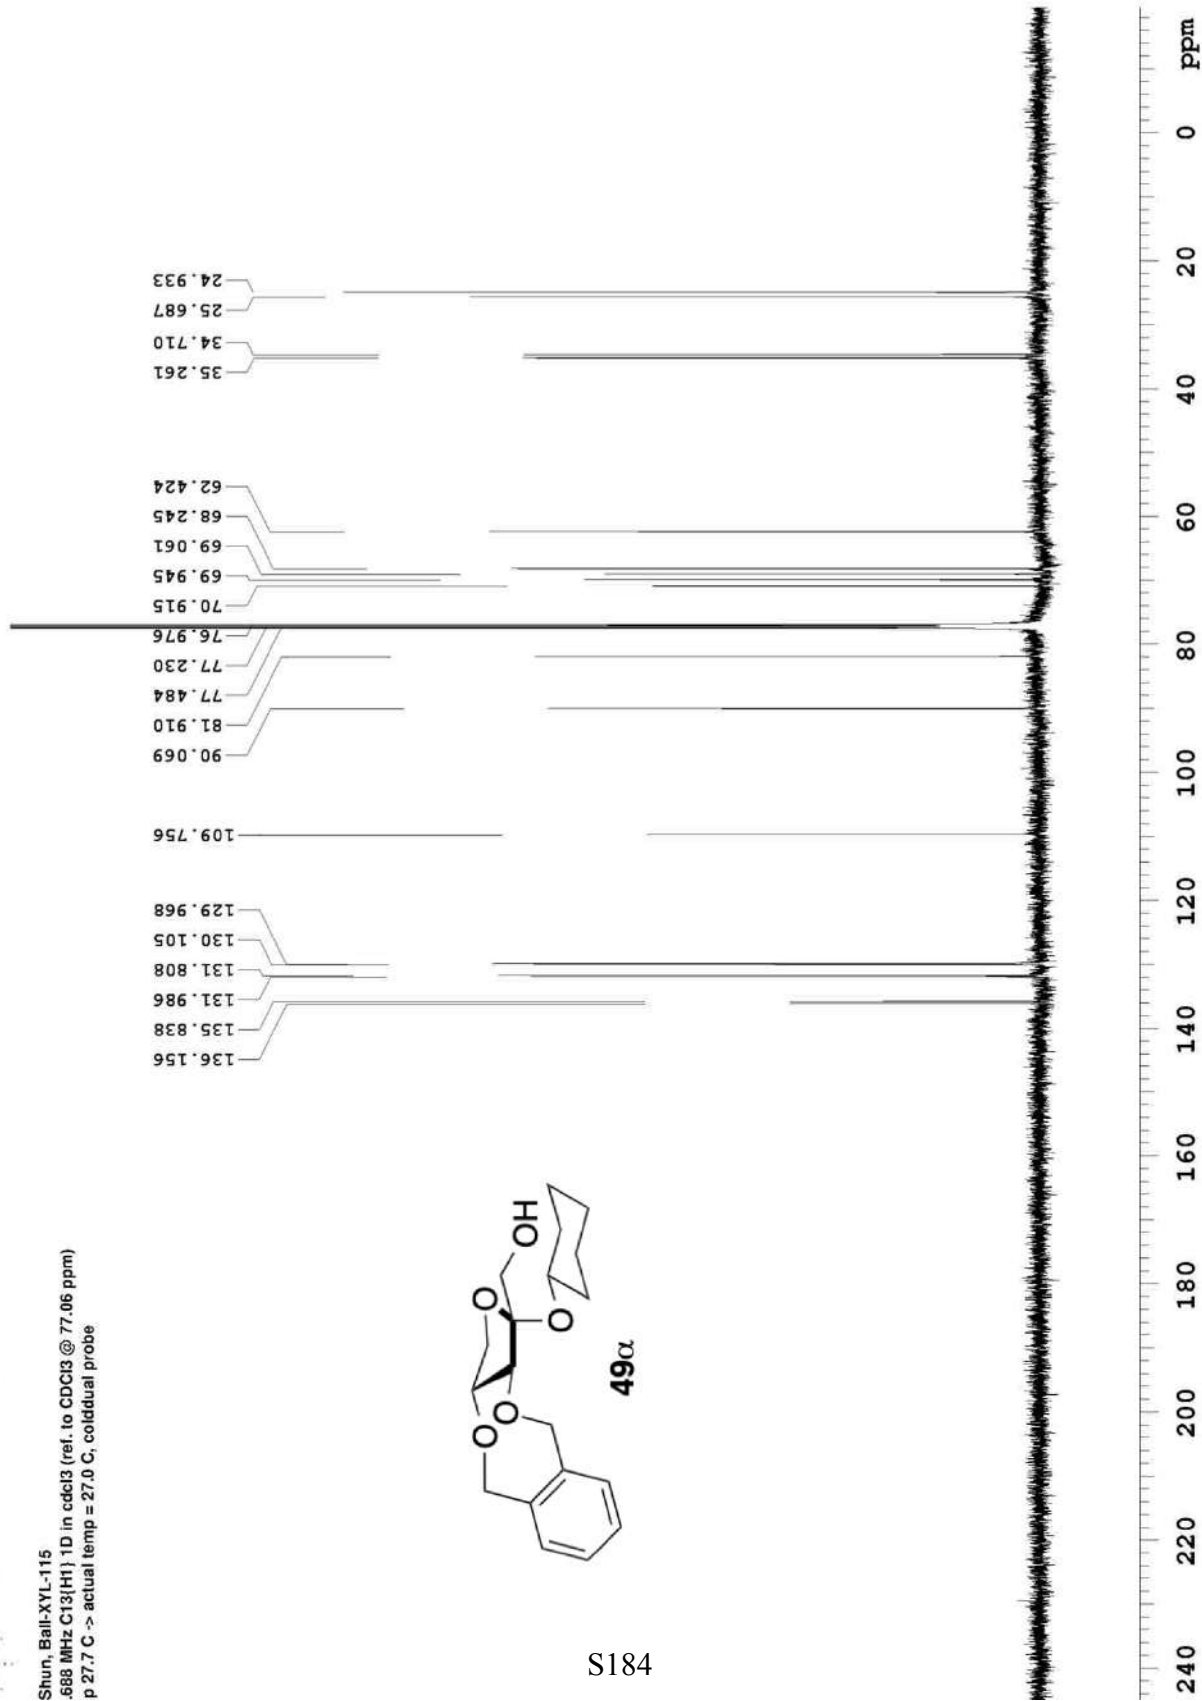

Recorded on: **u500, Mar 6 2017** Sweep Width(Hz): **6009.62** Acquisition Time(s): **5** Relaxation Delay(s): **0.1**  
 Pulse Sequence: **PRESAT** Digital Res.(Hz/pt): **0.09** Hz per mm(Hz/mm): **22.54** Completed Scans: **16**

Bo-Shun, Ball-XYL-110  
 499.797 MHz H1 1D in cdcl3 (ref. to CDCB @ 7.26 ppm)  
 temp 27.7 C -> actual temp = 27.0 C, coldludal probe

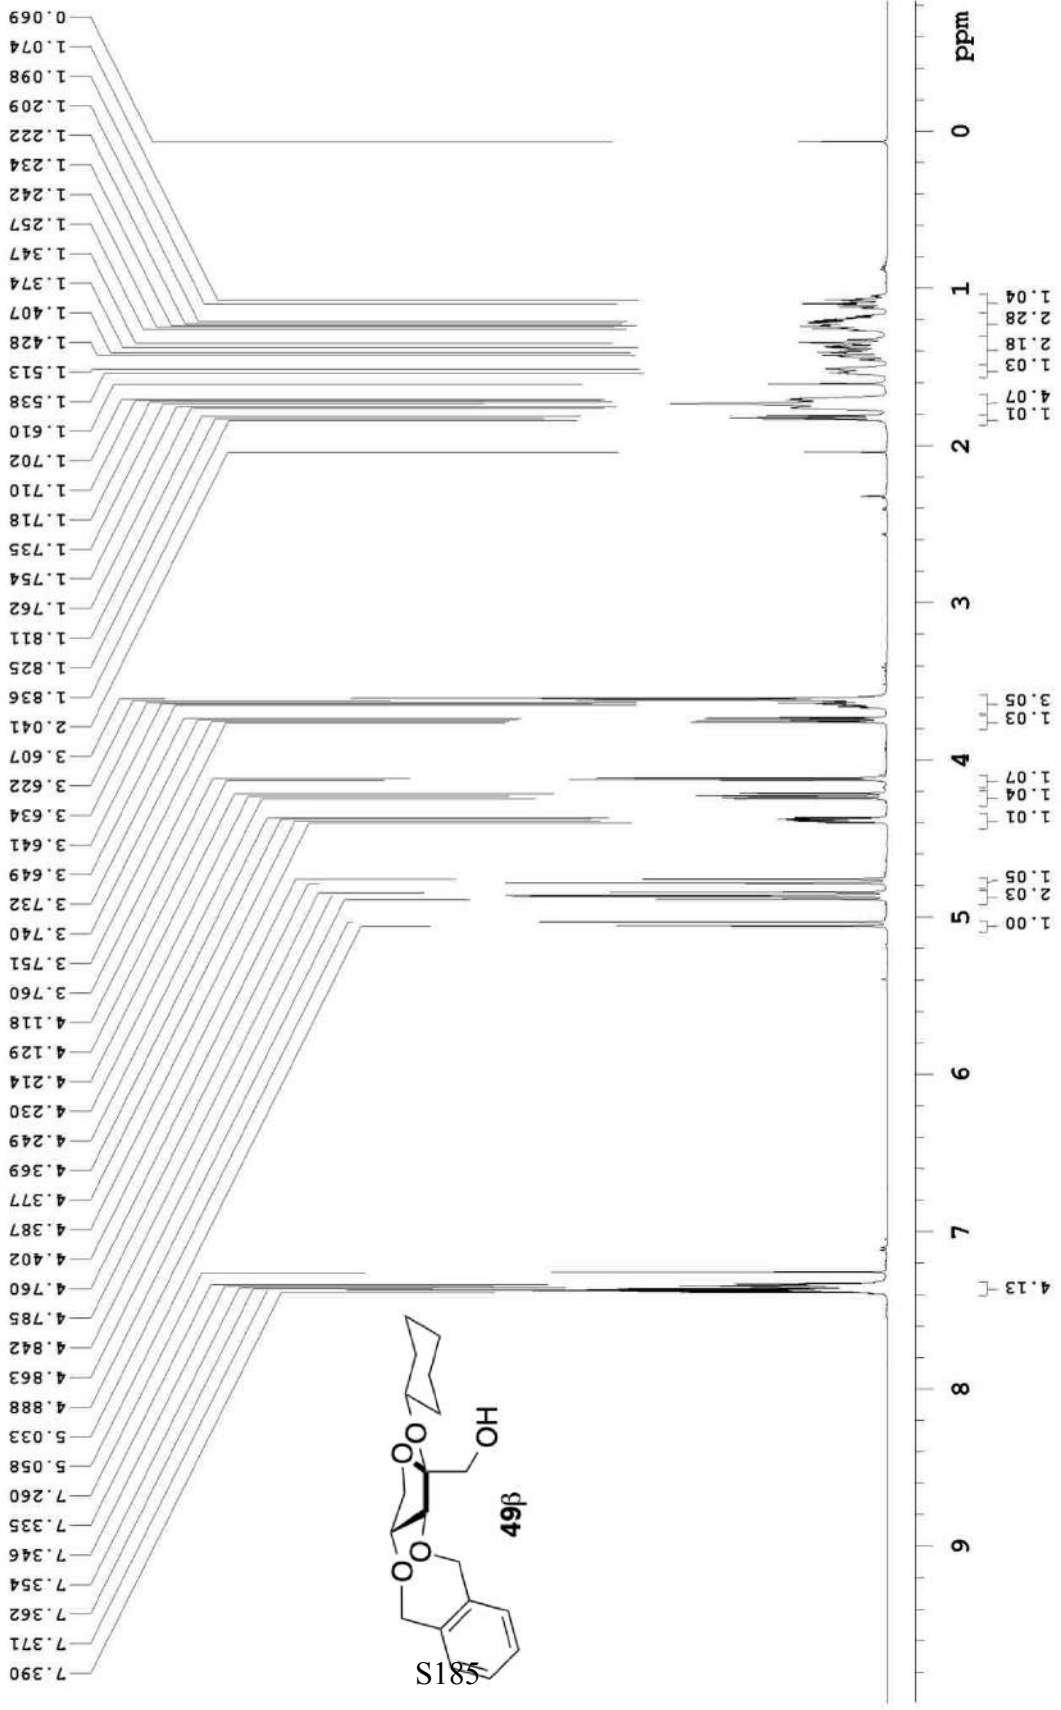

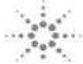

ihun, Balli-XYL-110  
388 MHz C13{H1} 1D in cdcl3 (ref. to CDC13 @ 77.06 ppm)  
1 27.7 C -> actual temp = 27.0 C, coldlual probe

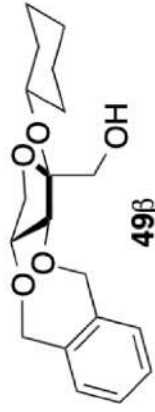

S186

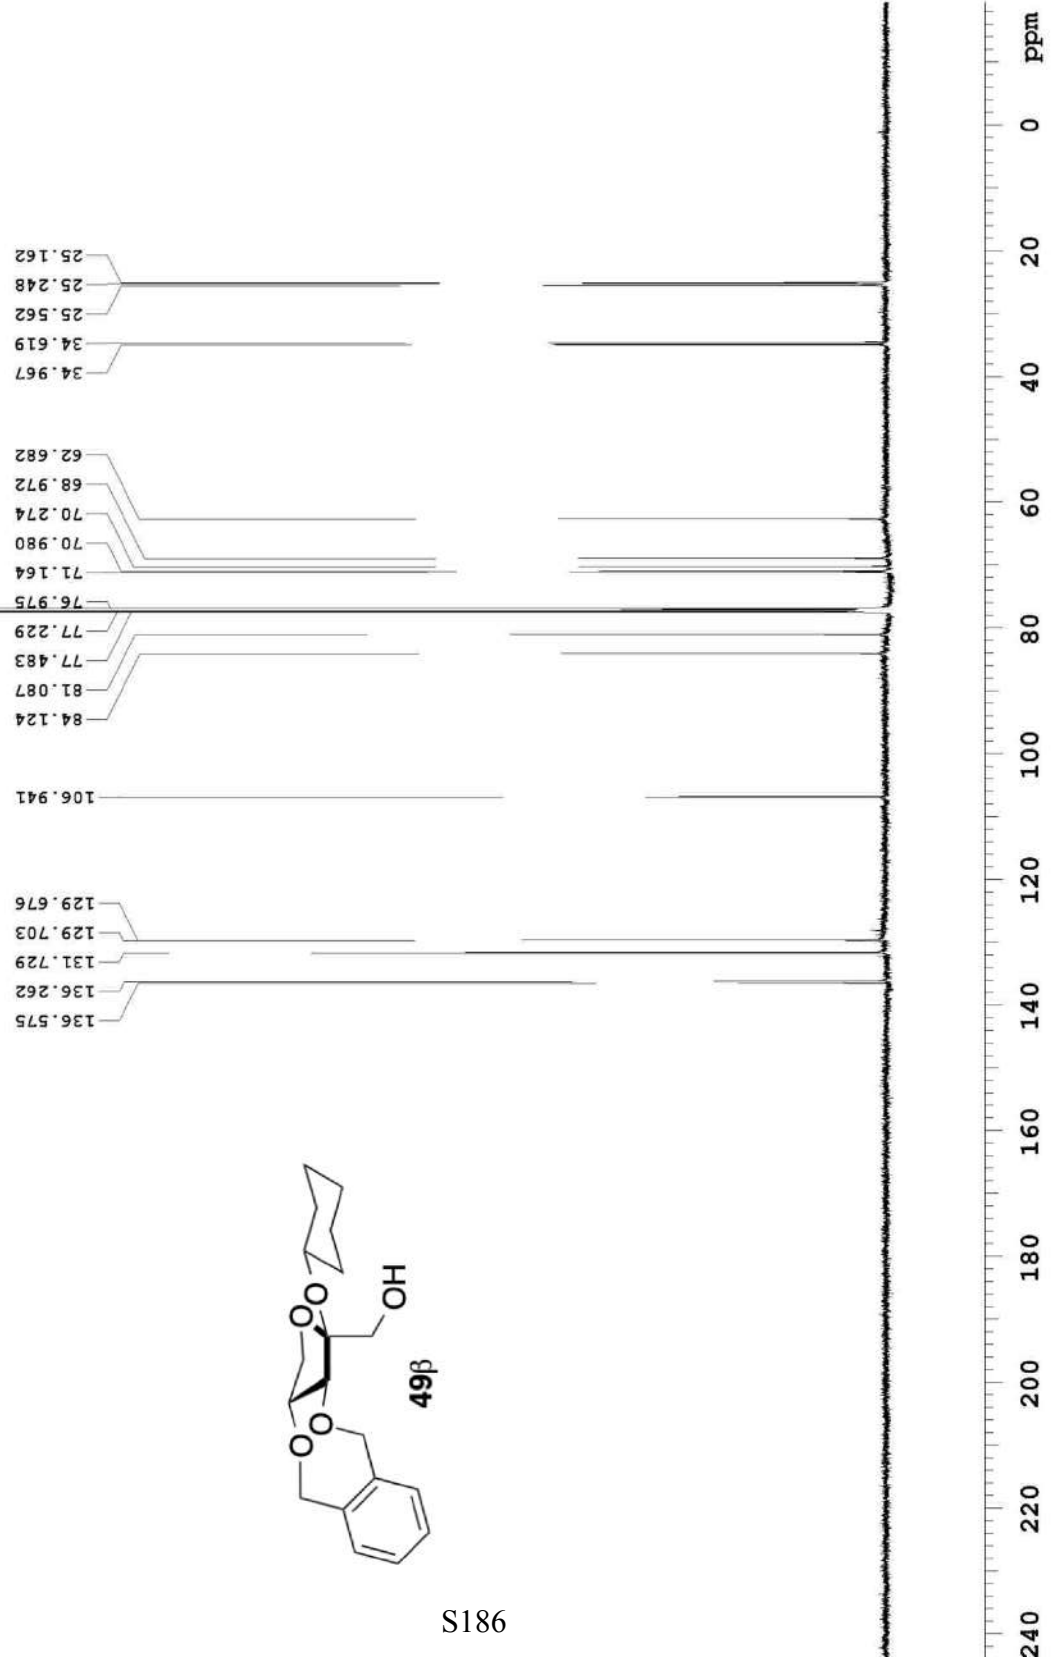

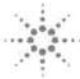

**Agilent Technologies**

Relaxation Delay(s): 2  
Completed Scans 32

Acquisition Time(s): 3  
Hz per mm(Hz/mm): 25.04

Sweep Width(Hz): 6009.62  
Digital Res.(Hz/pt): 0.09

Recorded on: u500, Nov 6 2017  
Pulse Sequence: PRESAT

Bo-Shun, Balli-XYL-158  
499.798 MHz H1 1D in d2o (ref. to external acetone @ 2.225 ppm)  
temp 27.7 C -> actual temp = 27.0 C, coldddual probe

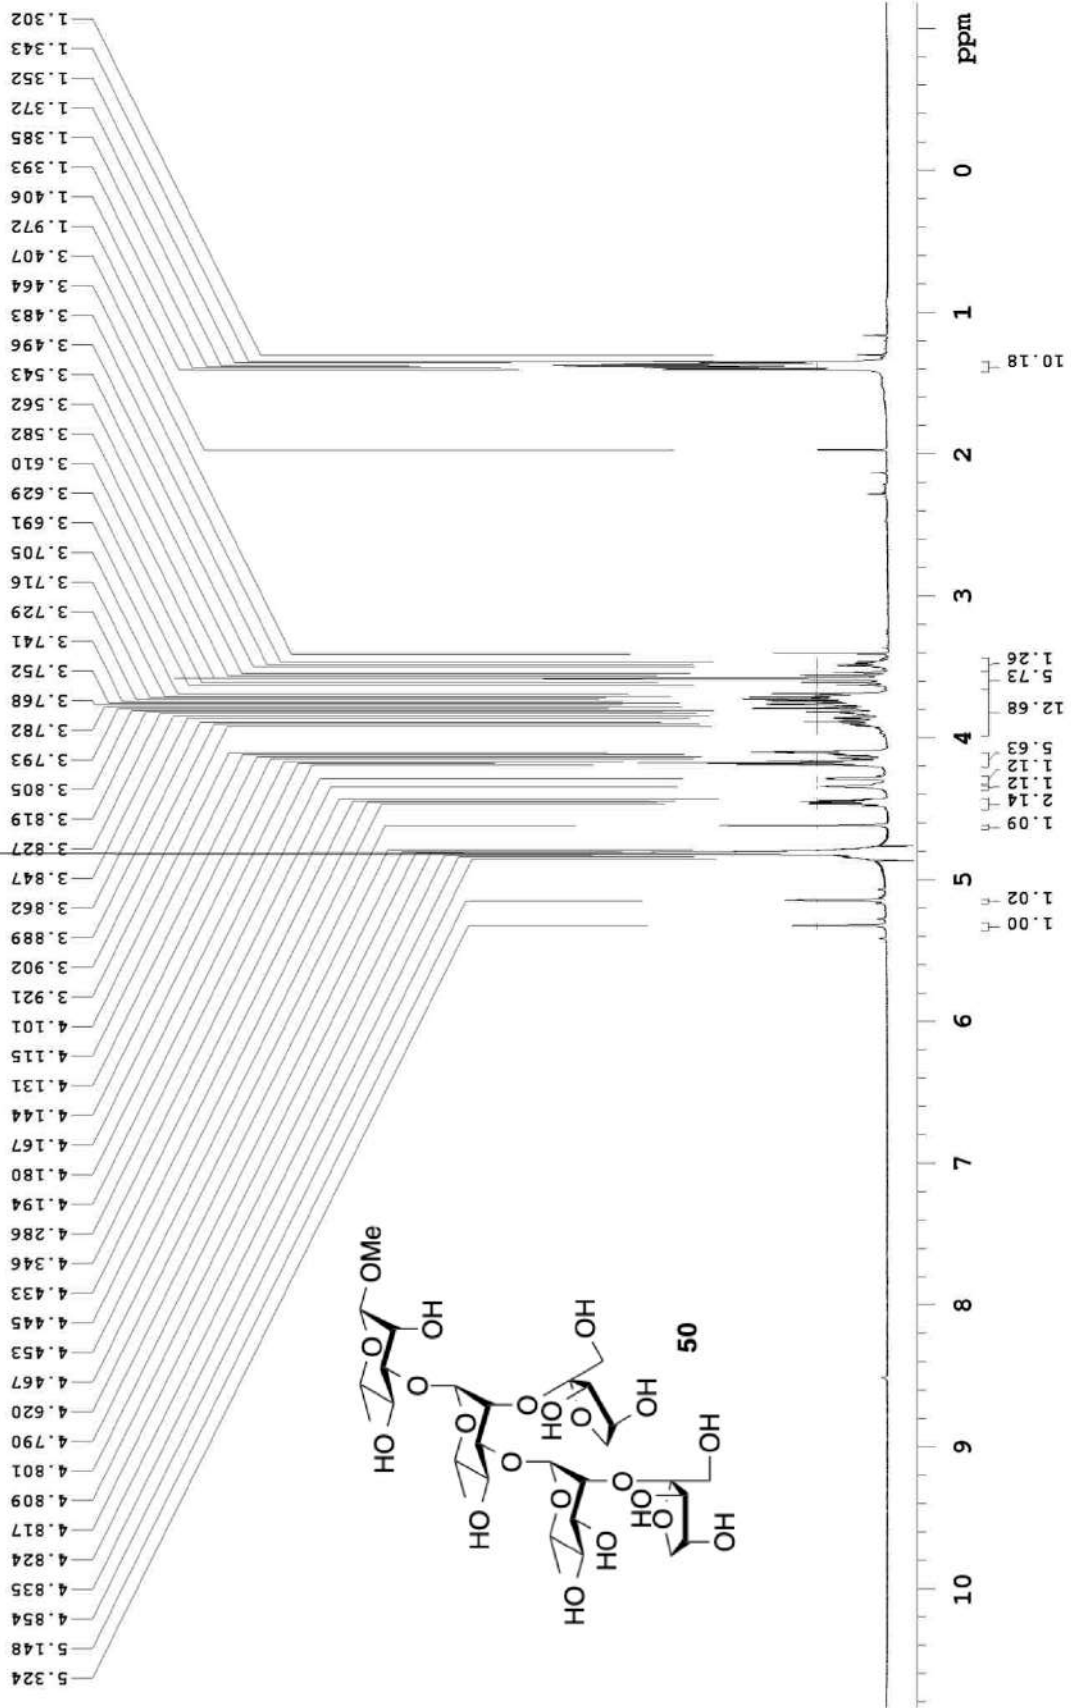



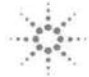

# Agilent Technologies

Recorded on: **u500, Nov 15 2017**      Sweep Width(Hz): **33783.8**      Acquisition Time(s): **1**      Relaxation Delay(s): **1**  
Pulse Sequence: **s2pul**      Digital Res.(Hz/mm): **0.26**      Hz per mm(Hz/mm): **109.4**      Completed Scans: **5892**

Bo-Shun, Ball-XYL-158  
125.688 MHz C13{[H]} 1D in d2o (ref. to external acetone @ 31.07 ppm)  
temp 27.7 C -> actual temp = 27.0 C, coldlual probe

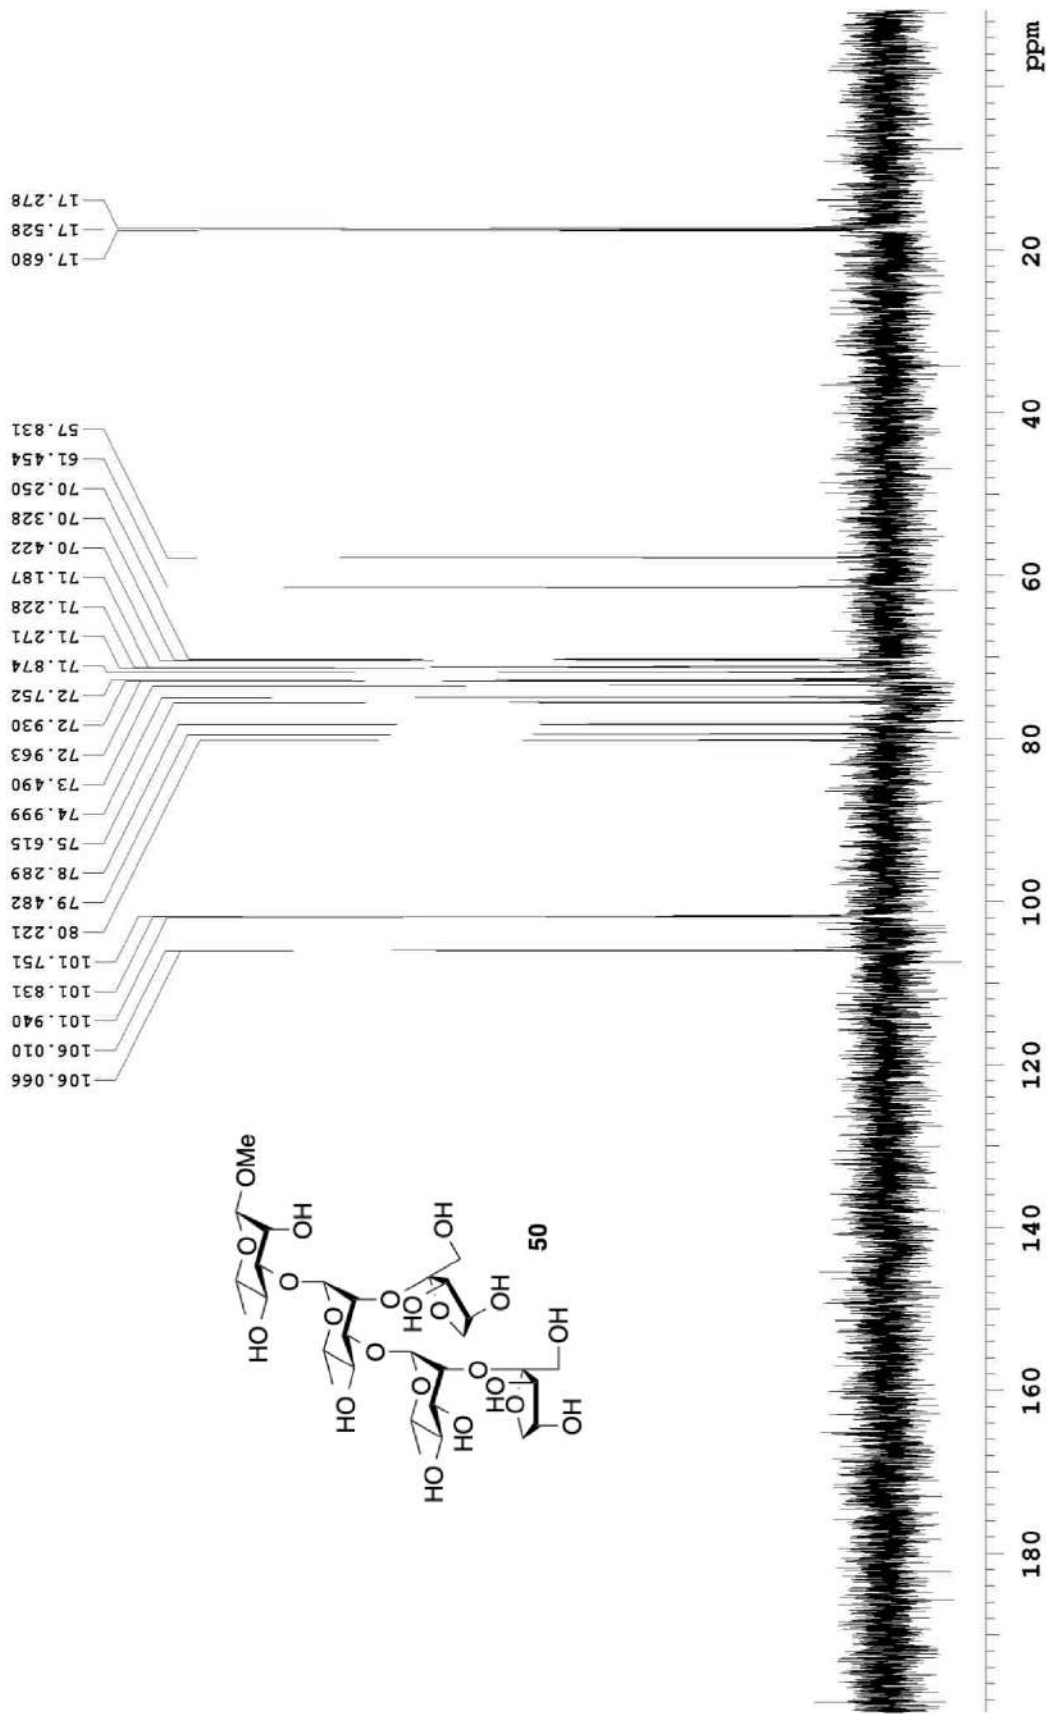



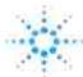

Recorded on: v700, Mar 7 2017  
Sweep Width(Hz): 48076.9  
Acquisition Time(s): 1  
Relaxation Delay(s): 1  
Pulse Sequence: s2pul  
Digital Res.(Hz/ppm): 154.05  
Completed Scans: 256

Bo-Shun, Ball-XYL-109  
175.975 MHz C13(H1) 1D in cdcl3 (ref. to CDCl3 @ 77.06 ppm)  
temp 27.5 C -> actual temp = 27.0 C, coldid probe

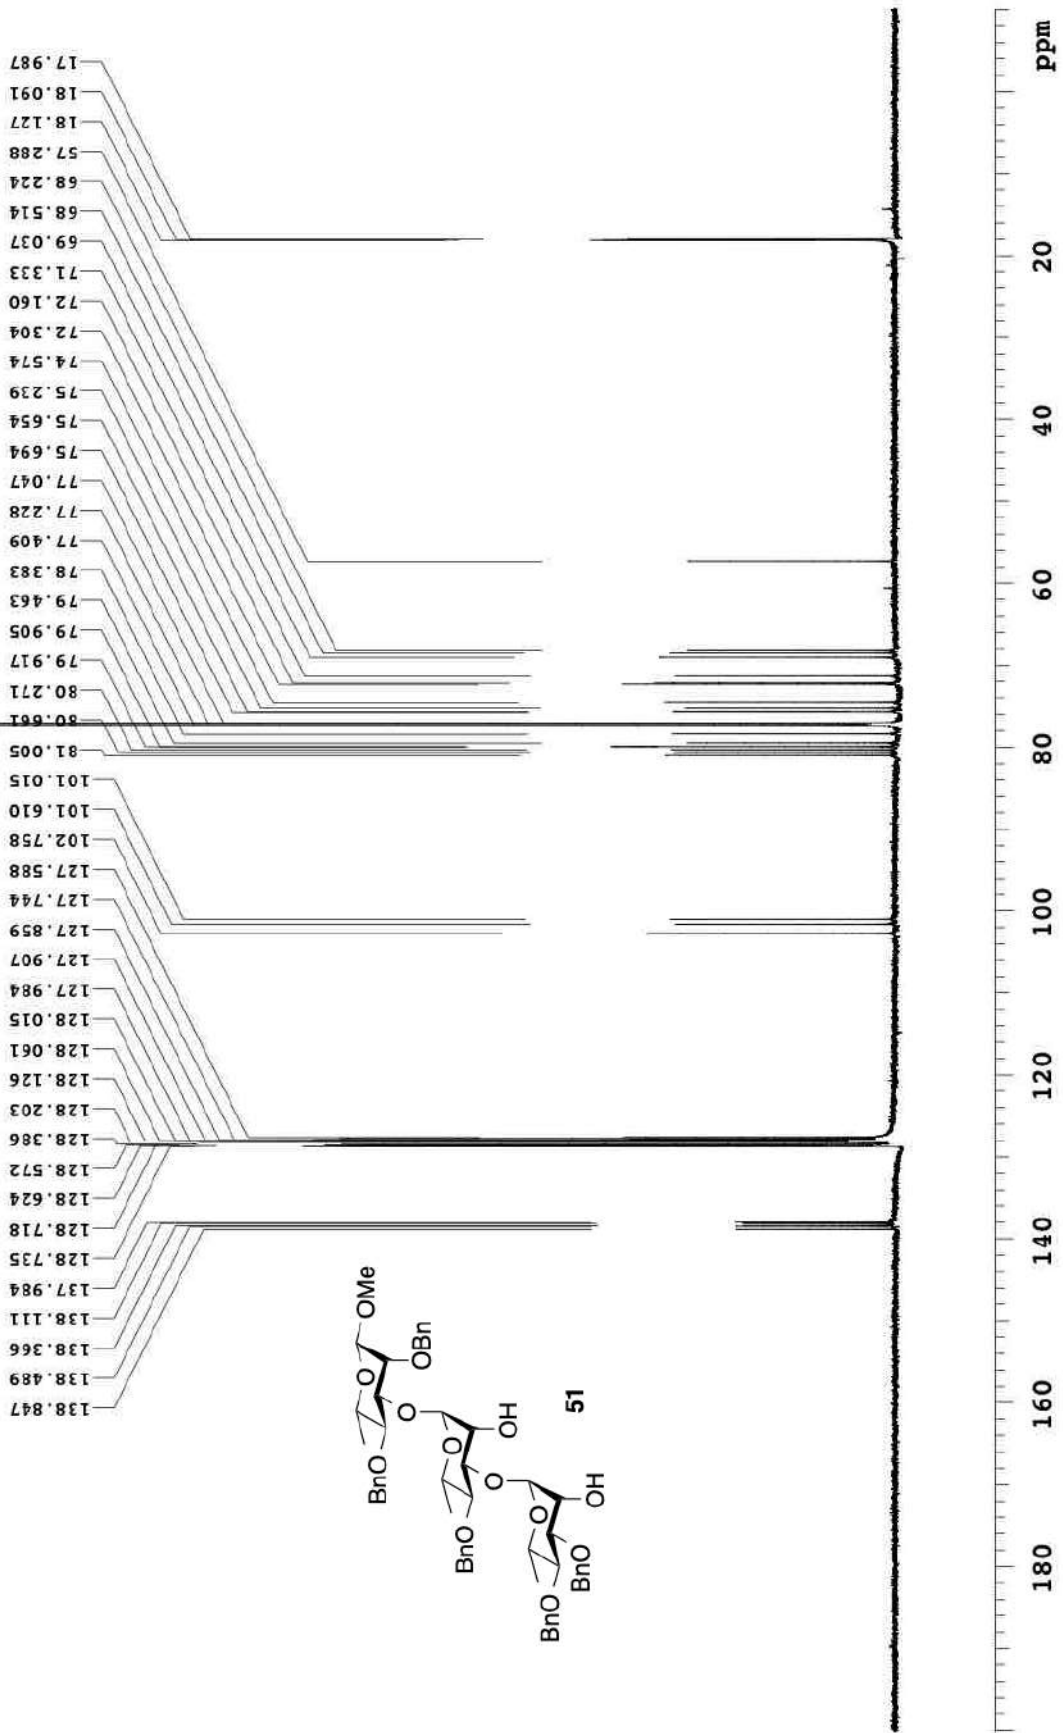



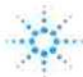

Bo-Shun, Ball-XYL-098  
125.688 MHz C13(H1) 1D in cdcl3 (ref. to CDCl3 @ 77.06 ppm)  
temp 27.7 C -> actual temp = 27.0 C, coldidial probe

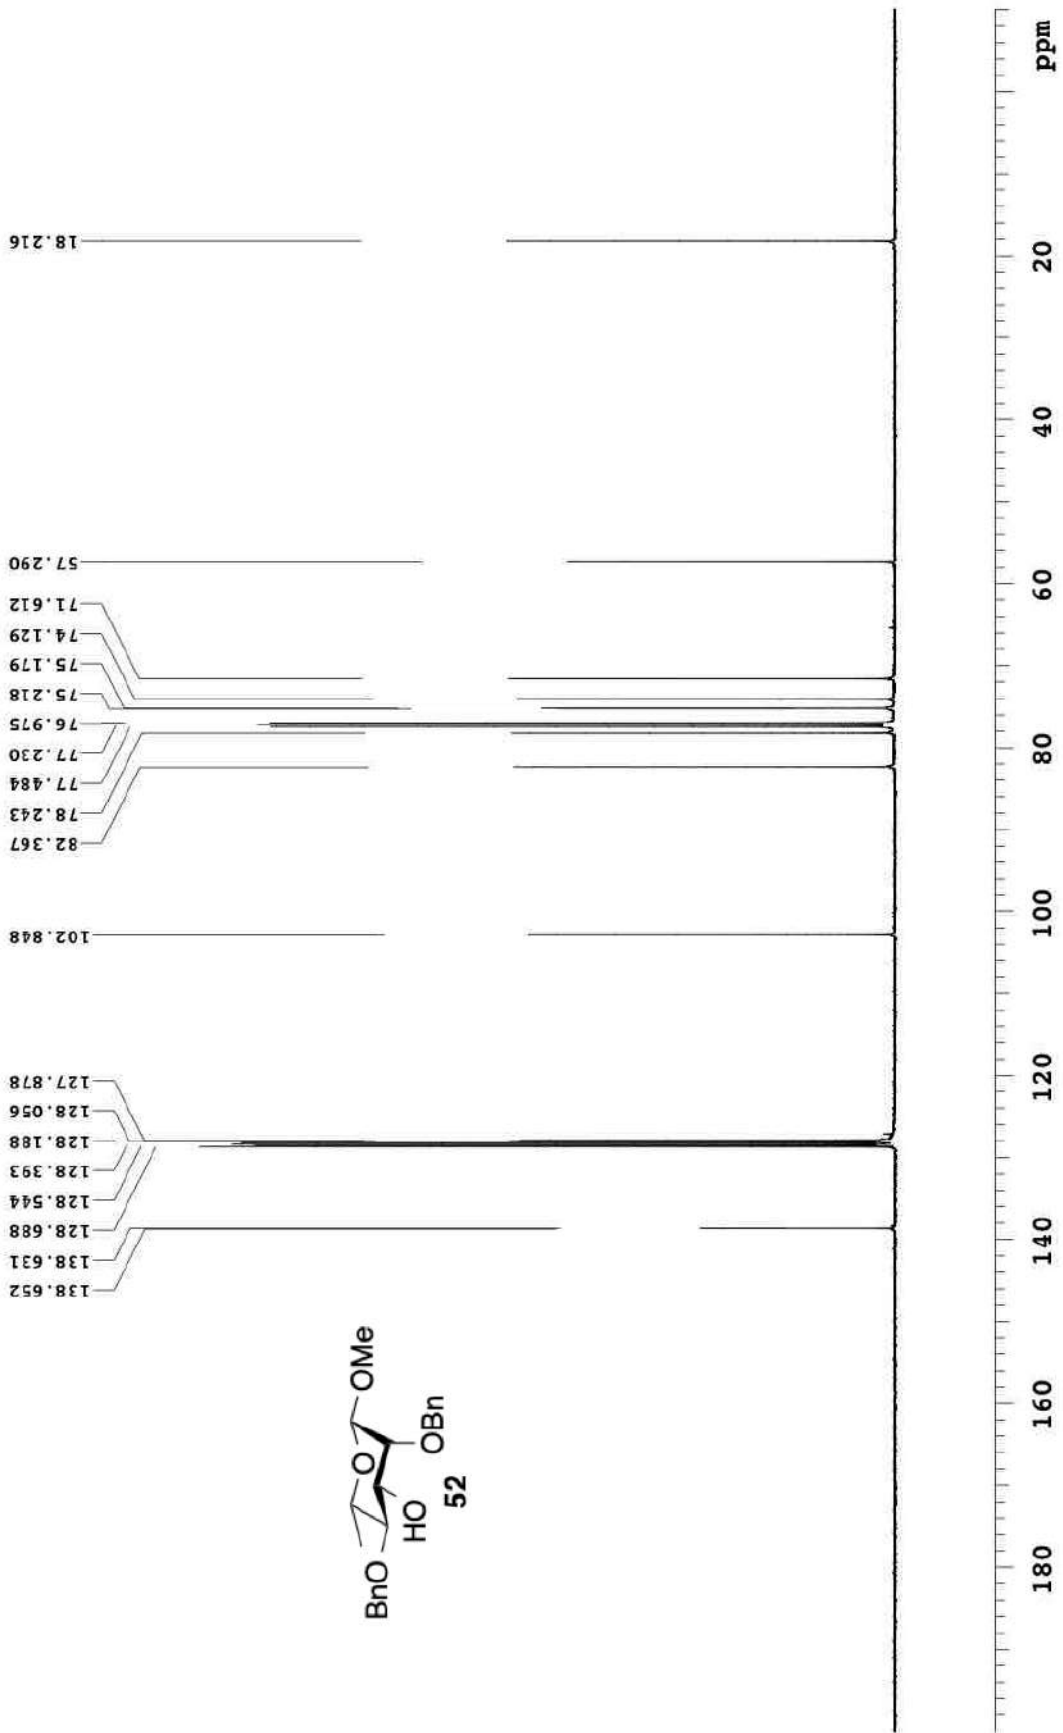











Bo-Shun, Bal-XY1-104  
699.762 MHz H1 1D in cdcl3 (ref. to CDCl3 @ 7.26 ppm)  
temp 27.5 C -> actual temp = 27.0 C, coldid probe

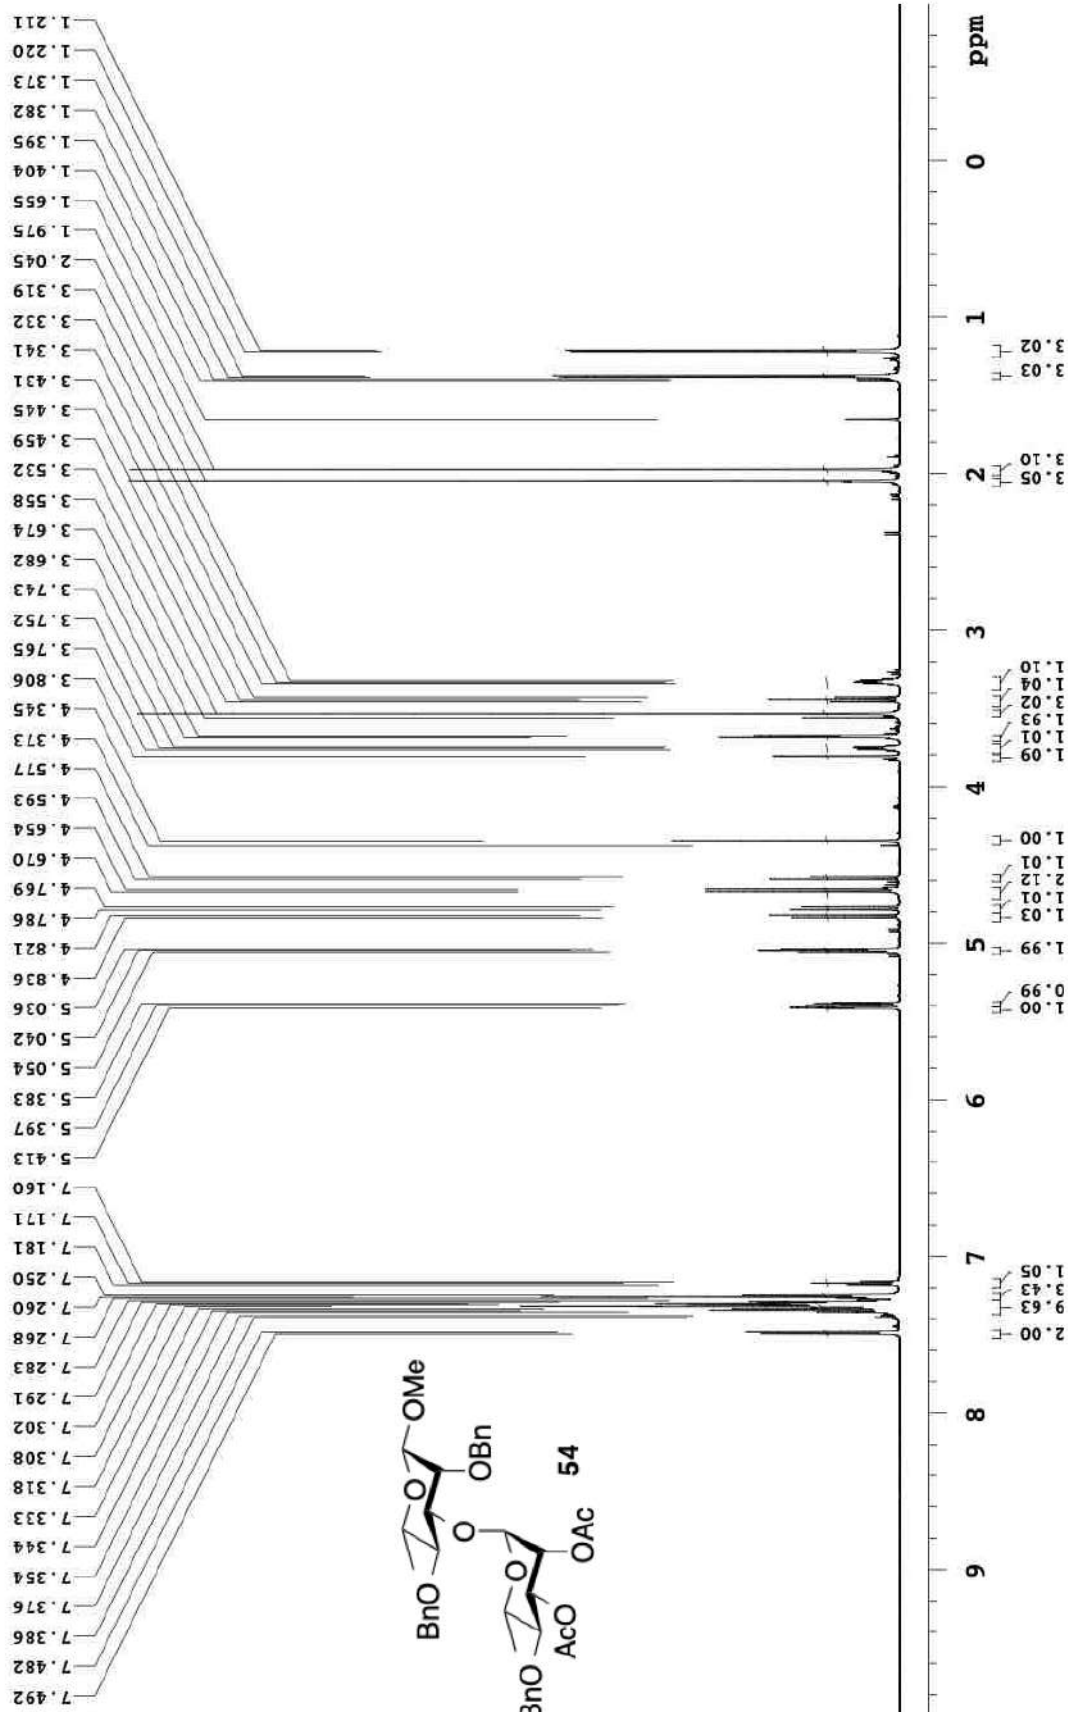



Department of Chemistry, University of Alberta

Recorded on: **v700, Feb 18 2017**  
Pulse Sequence: **s2pul**

Acquisition Time(s): **1**  
Hz per mm(Hz/mm): **154.05**

Relaxation Delay(s): **1**  
Completed Scans: **256**

Bo-Shun, BalI-Xyl-104

175.975 MHz C13(H1) 1D in cdcl3 (ref. to CDCl3 @ 77.06 ppm)  
temp 27.5 C -> actual temp = 27.0 C, coldid probe

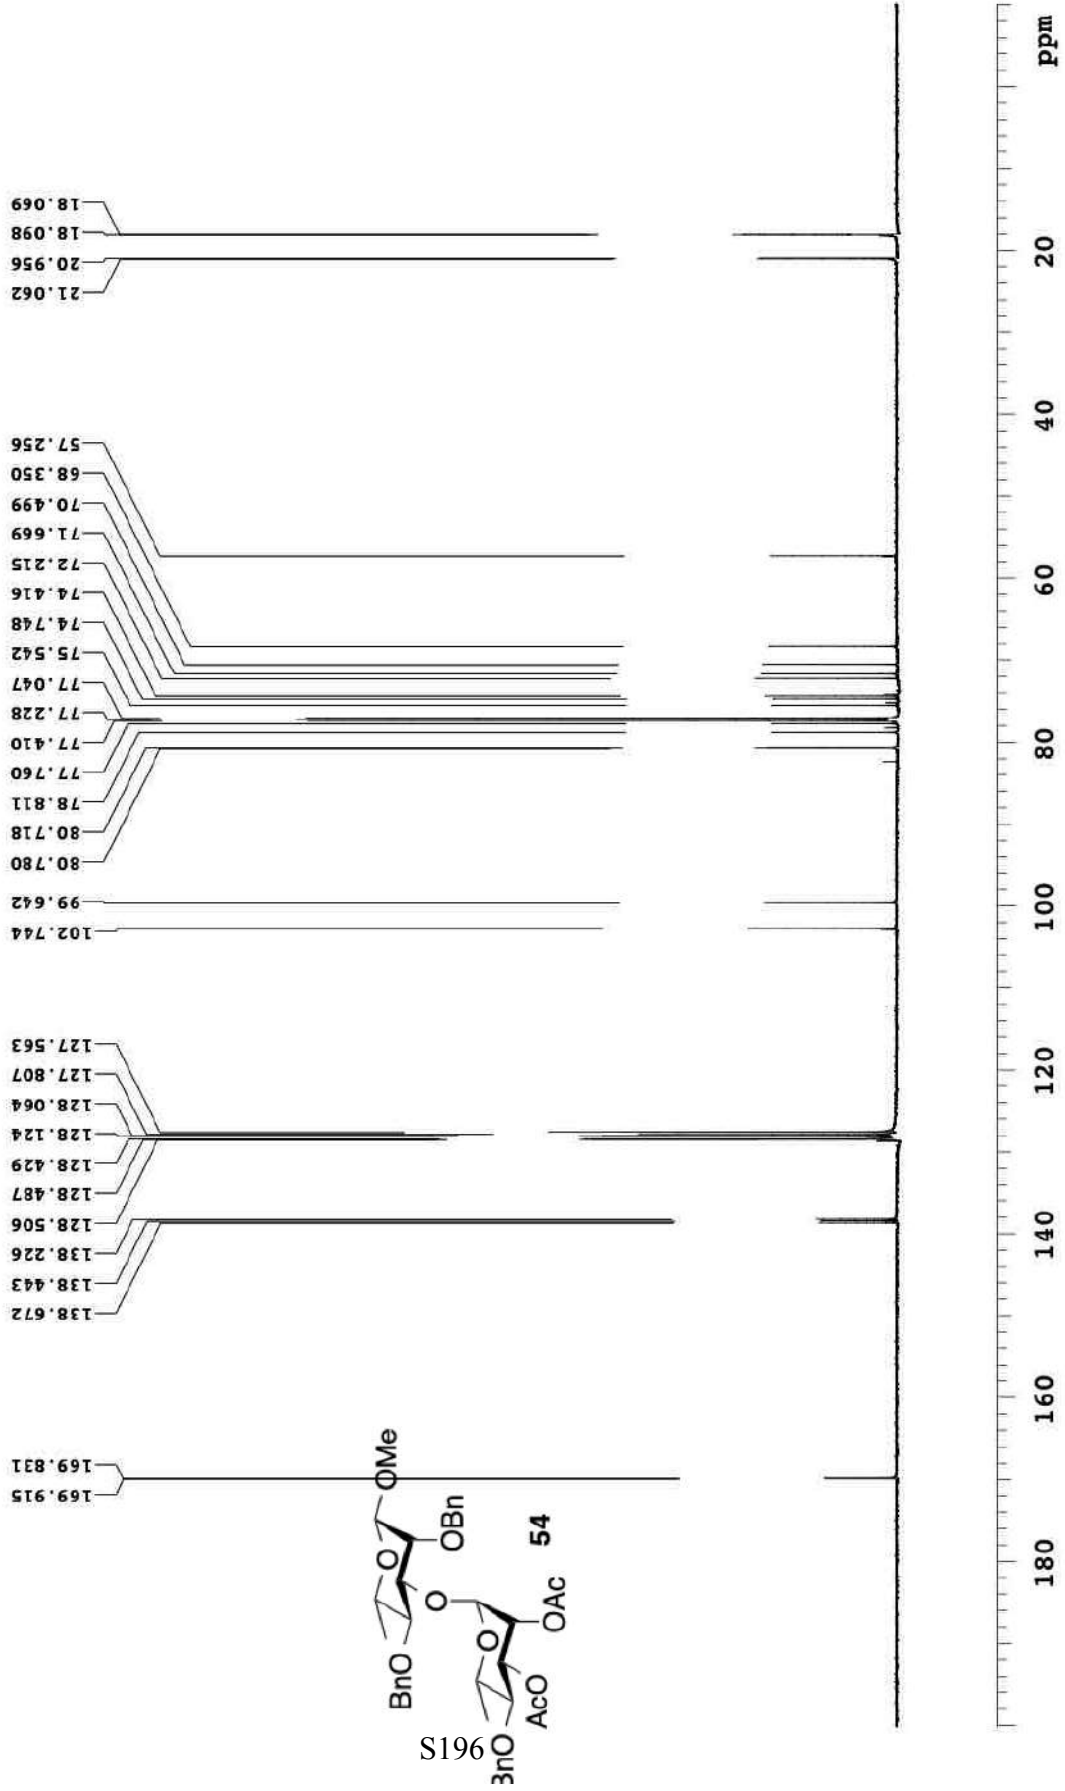

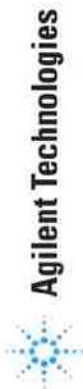

Bo-Shun, Ball-XYL-100  
 499.797 MHz H1 1D in cdcl3 (ref. to CDCl3 @ 7.26 ppm)  
 temp 27.7 C -> actual temp = 27.0 C, coldludal probe

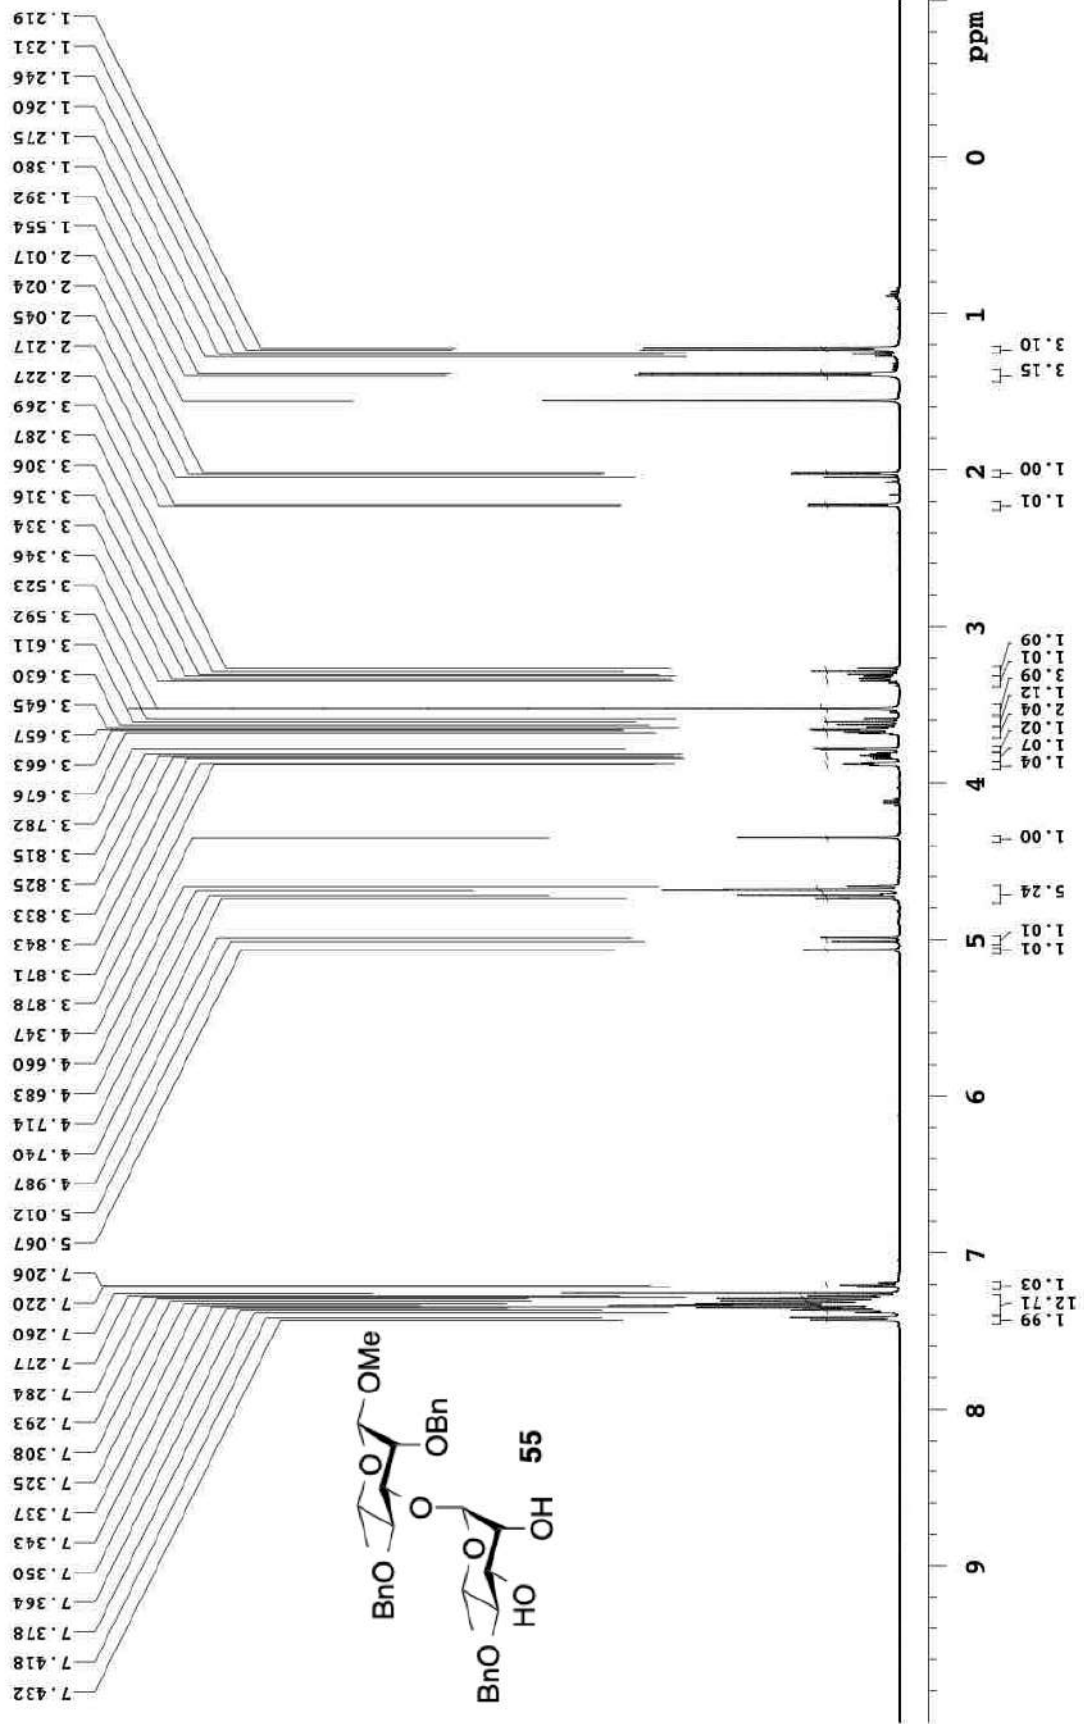



# Agilent Technologies

Bo-Shun, Ball-XYL-100  
125.688 MHz C13(H1) 1D in cdcl3 (ref. to CDC13 @ 77.06 ppm)  
temp 27.7 C -> actual temp = 27.0 C, coldluid probe

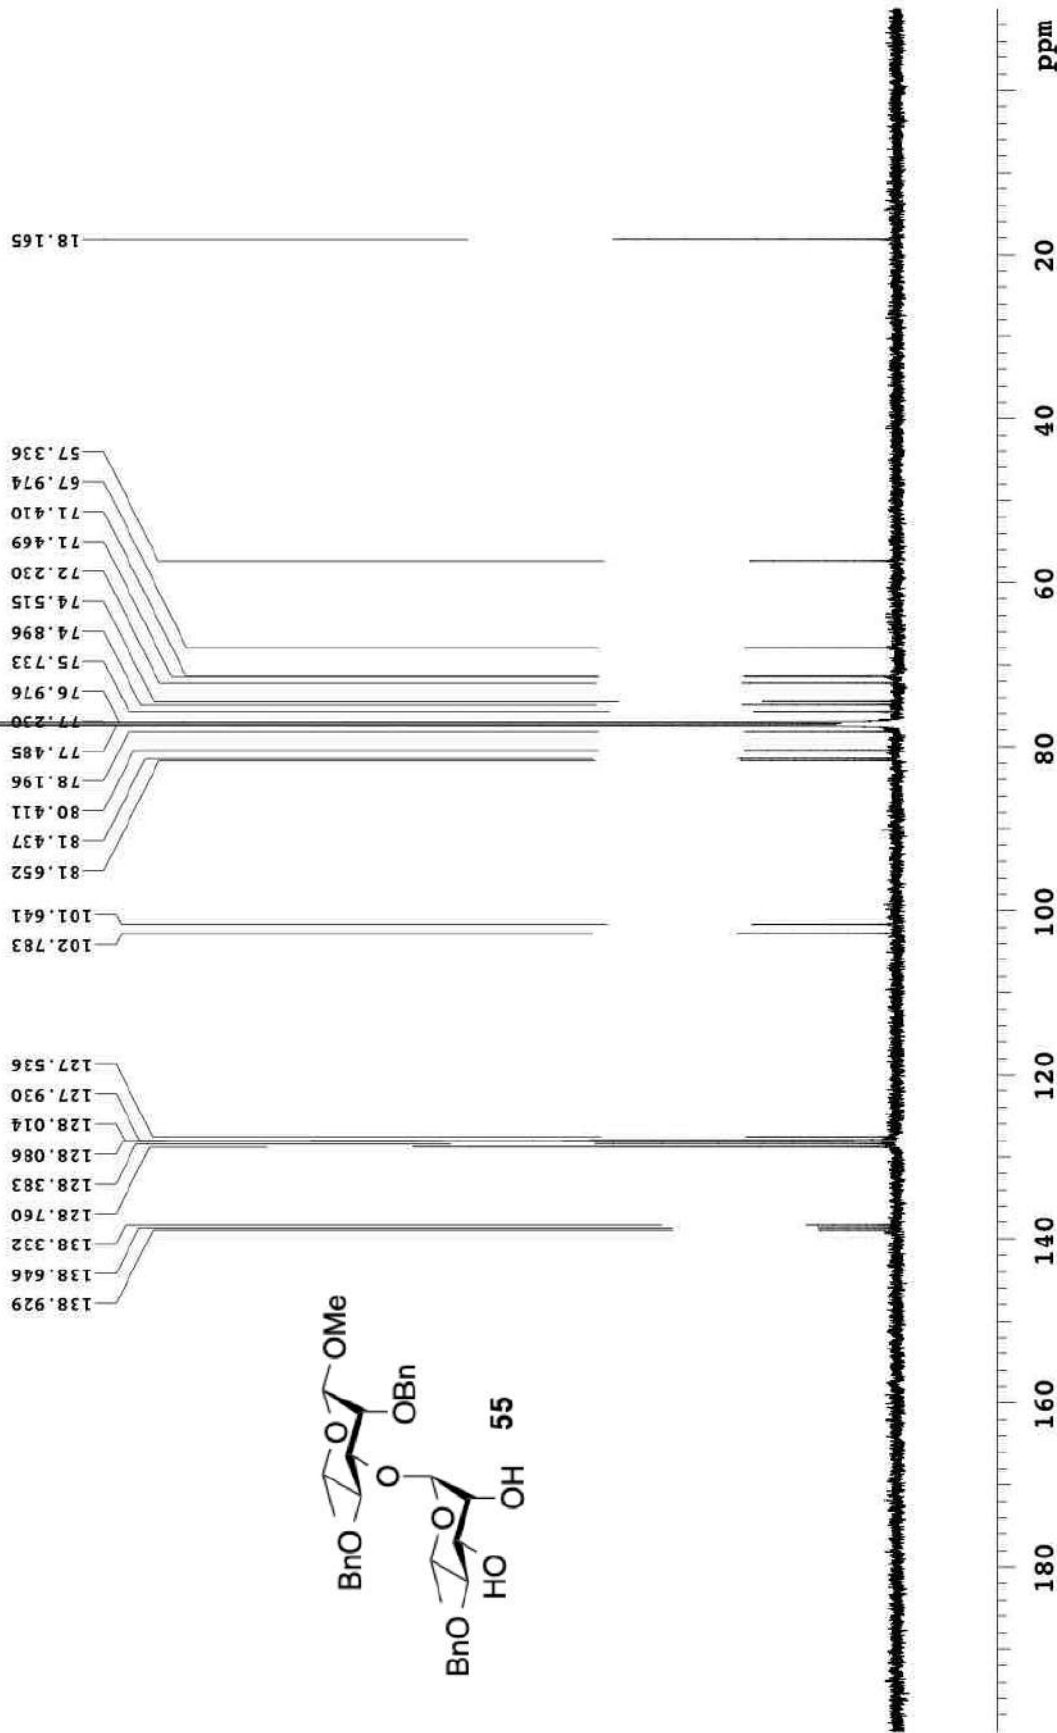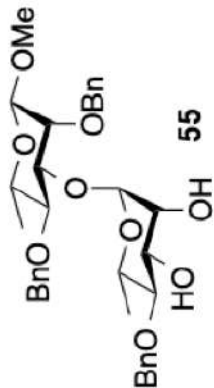



Bo-Shun, Balt-XYL-101  
 699.762 MHz H1 1D in cdcl3 (ref. to CDC13 @ 7.26 ppm)  
 temp 27.5 C -> actual temp = 27.0 C, coldid probe

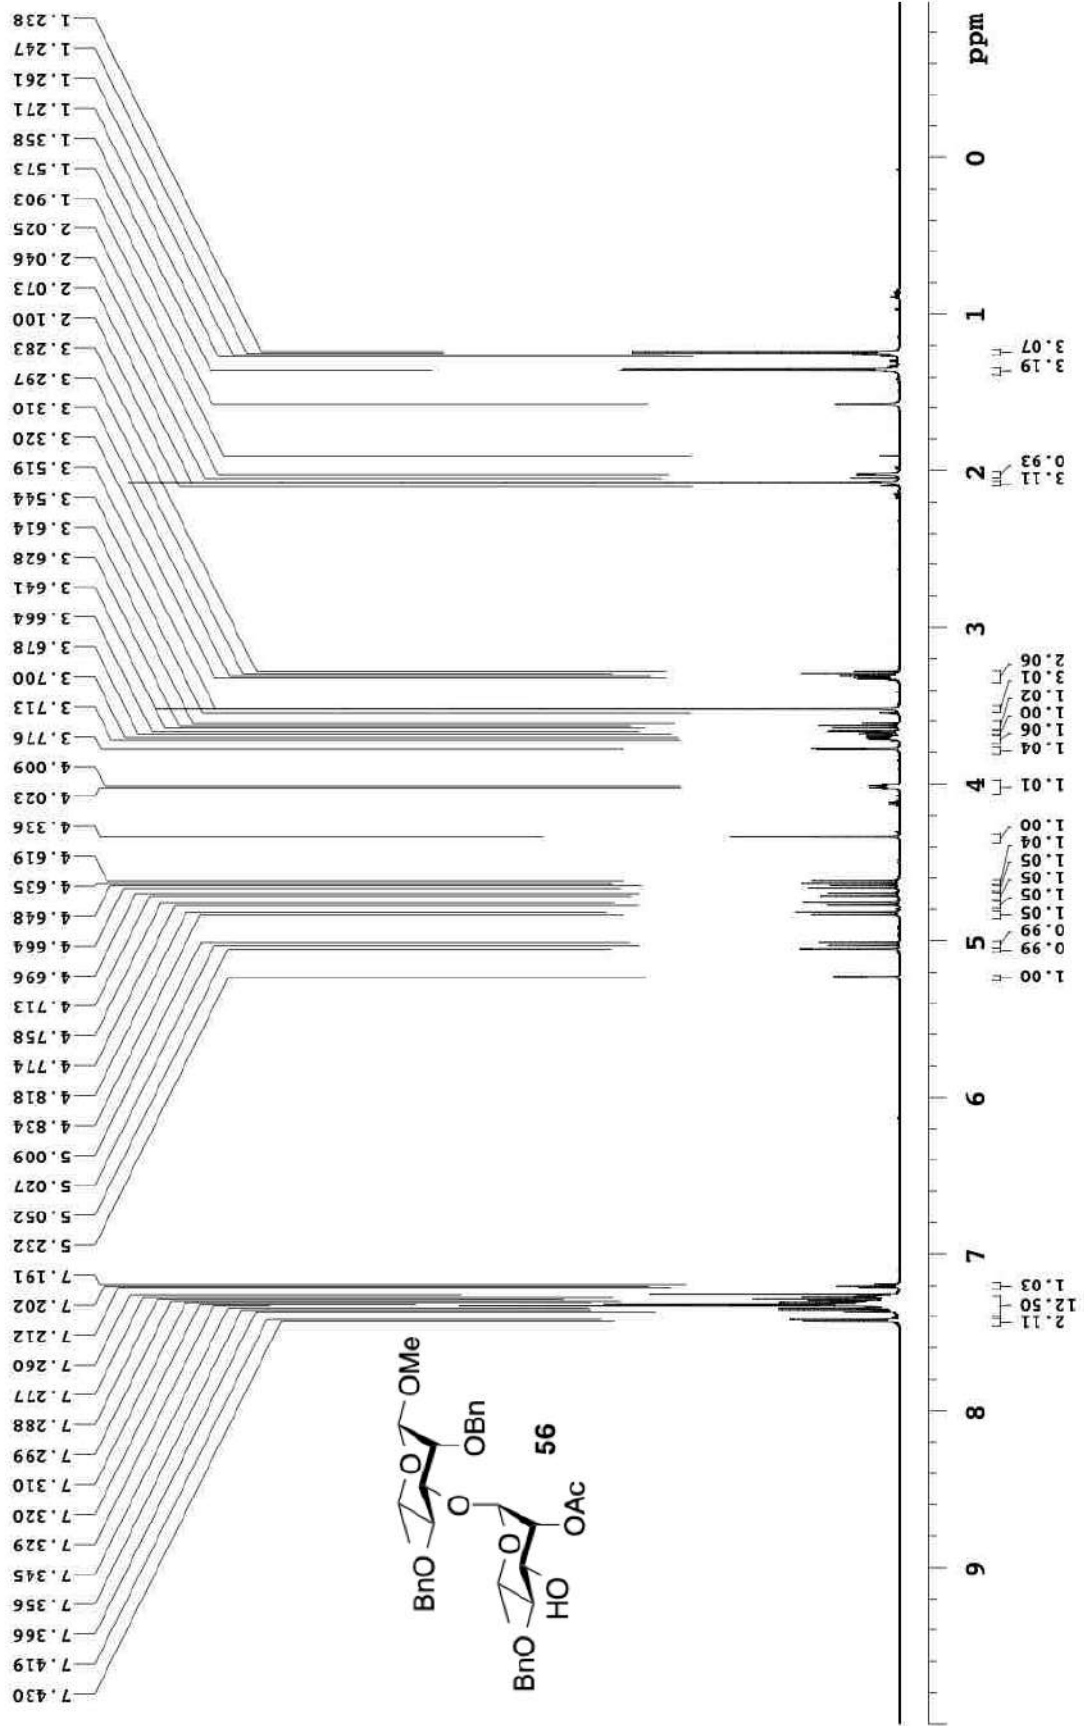



Department of Chemistry, University of Alberta

Recorded on: **v700, Feb 16 2017**  
Pulse Sequence: **s2pul**

Sweep Width (Hz): **48076.9**  
Digital Res. (Hz/pt): **0.37**

Acquisition Time(s): **1**  
Relaxation Delay(s): **1**  
Completed Scans: **256**

Bo-Shun, Balf-XYL-101  
175.975 MHz C13(H1) 1D in cdcl3 (ref. to CDCl3 @ 77.06 ppm)  
temp 27.5 C -> actual temp = 27.0 C, coldid probe

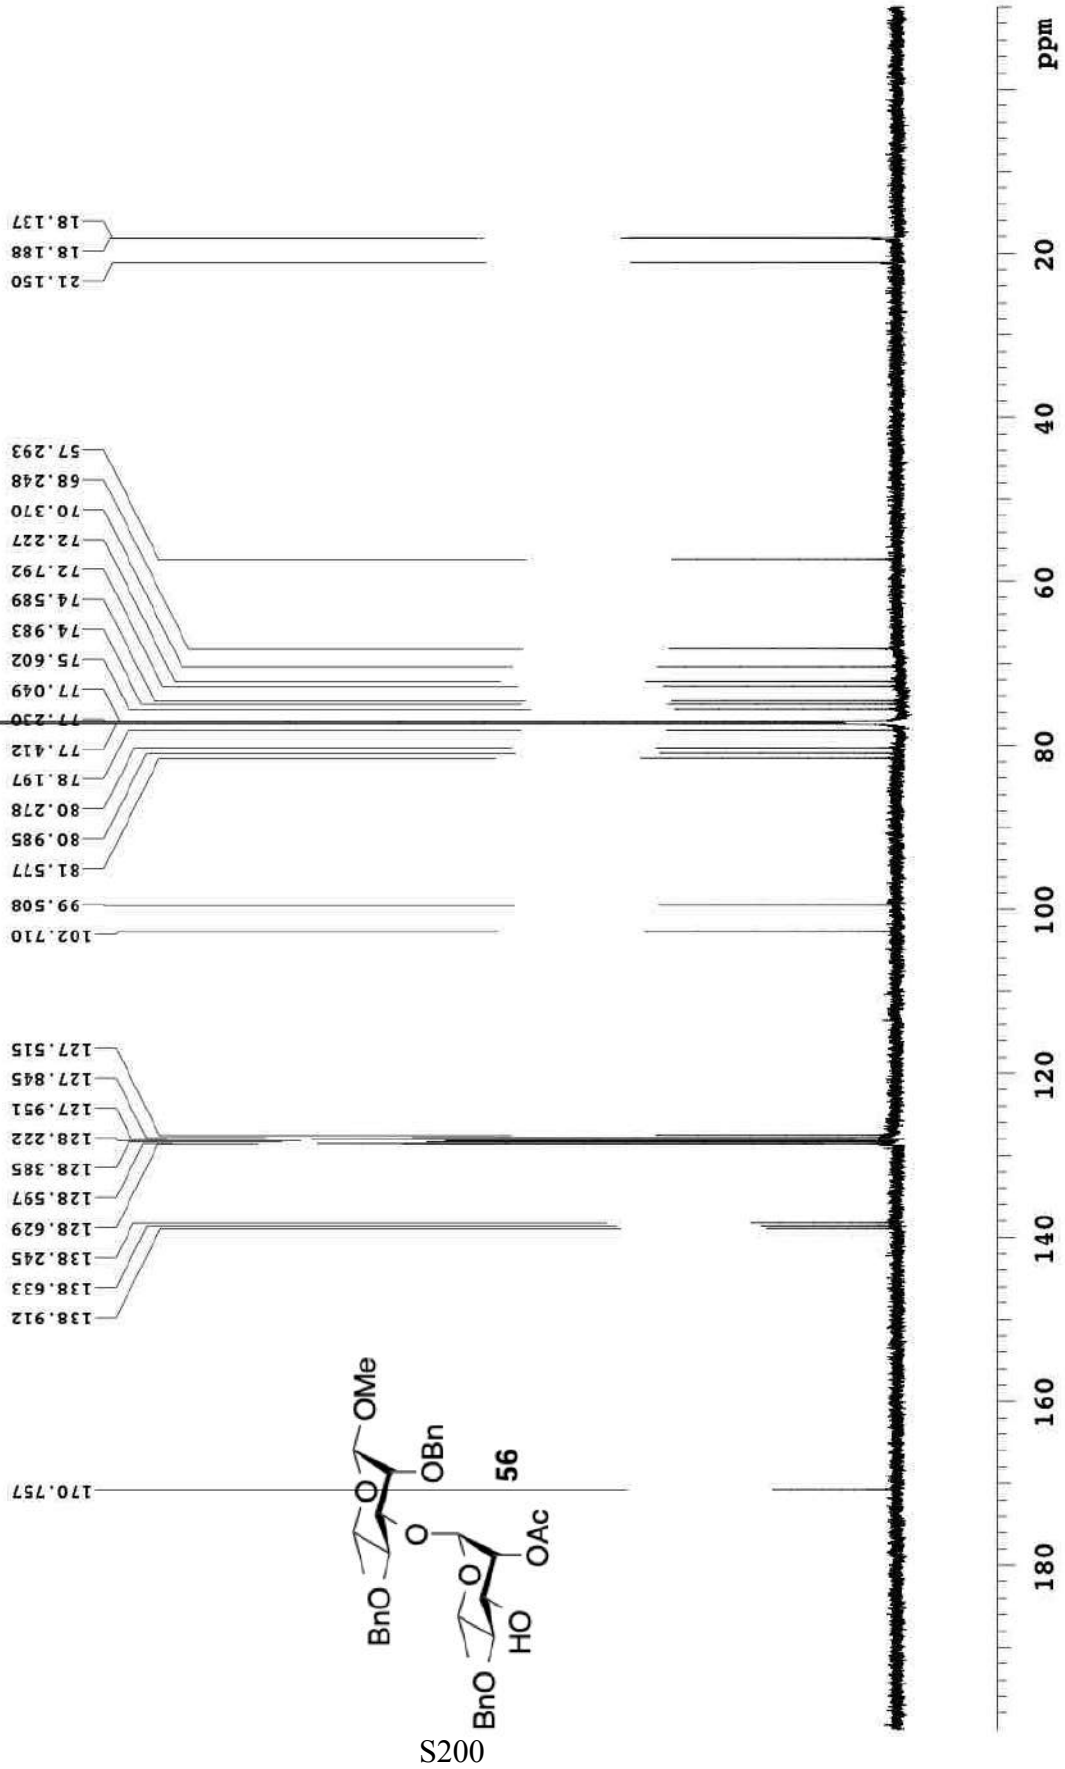

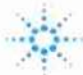

Bo-Shun, Ball-XYL-107  
699.762 MHz H1 1D in cdcl3 (ref. to CDCl3 @ 7.26 ppm)  
temp 27.5 C -> actual temp = 27.0 C, coldid probe

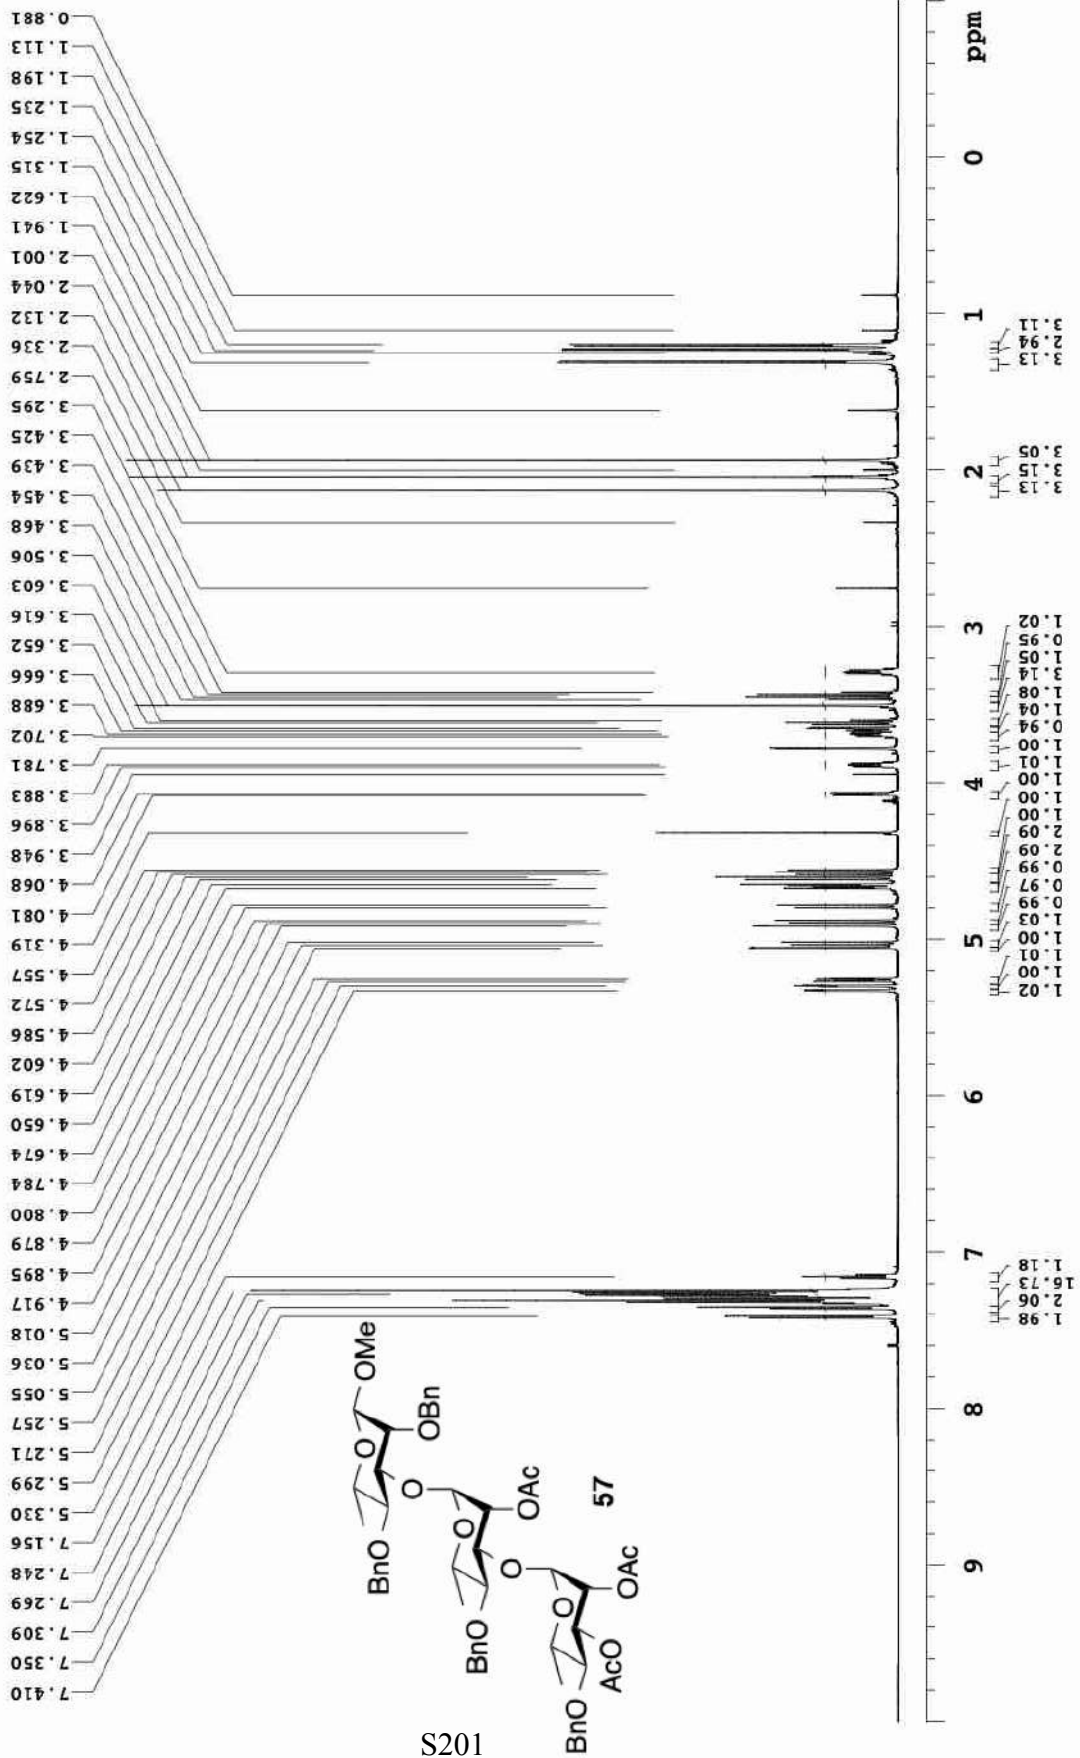





Department of Chemistry, University of Alberta

Relaxation Delay(s): 1  
Completed Scans: 256

Acquisition Time(s): 1  
Hz per mm(Hz/mm): 154.05

Sweep Width(Hz): 48076.9  
Digital Res.(Hz/pt): 0.37

Recorded on: v700, Mar 3 2017  
Pulse Sequence: s2pul

Bo-Shun, Ball-XYL-107  
175.975 MHz C13(H1) 1D in cdcl3 (ref. to CDC13 @ 77.06 ppm)  
temp 27.5 C -> actual temp = 27.0 C, coldid probe

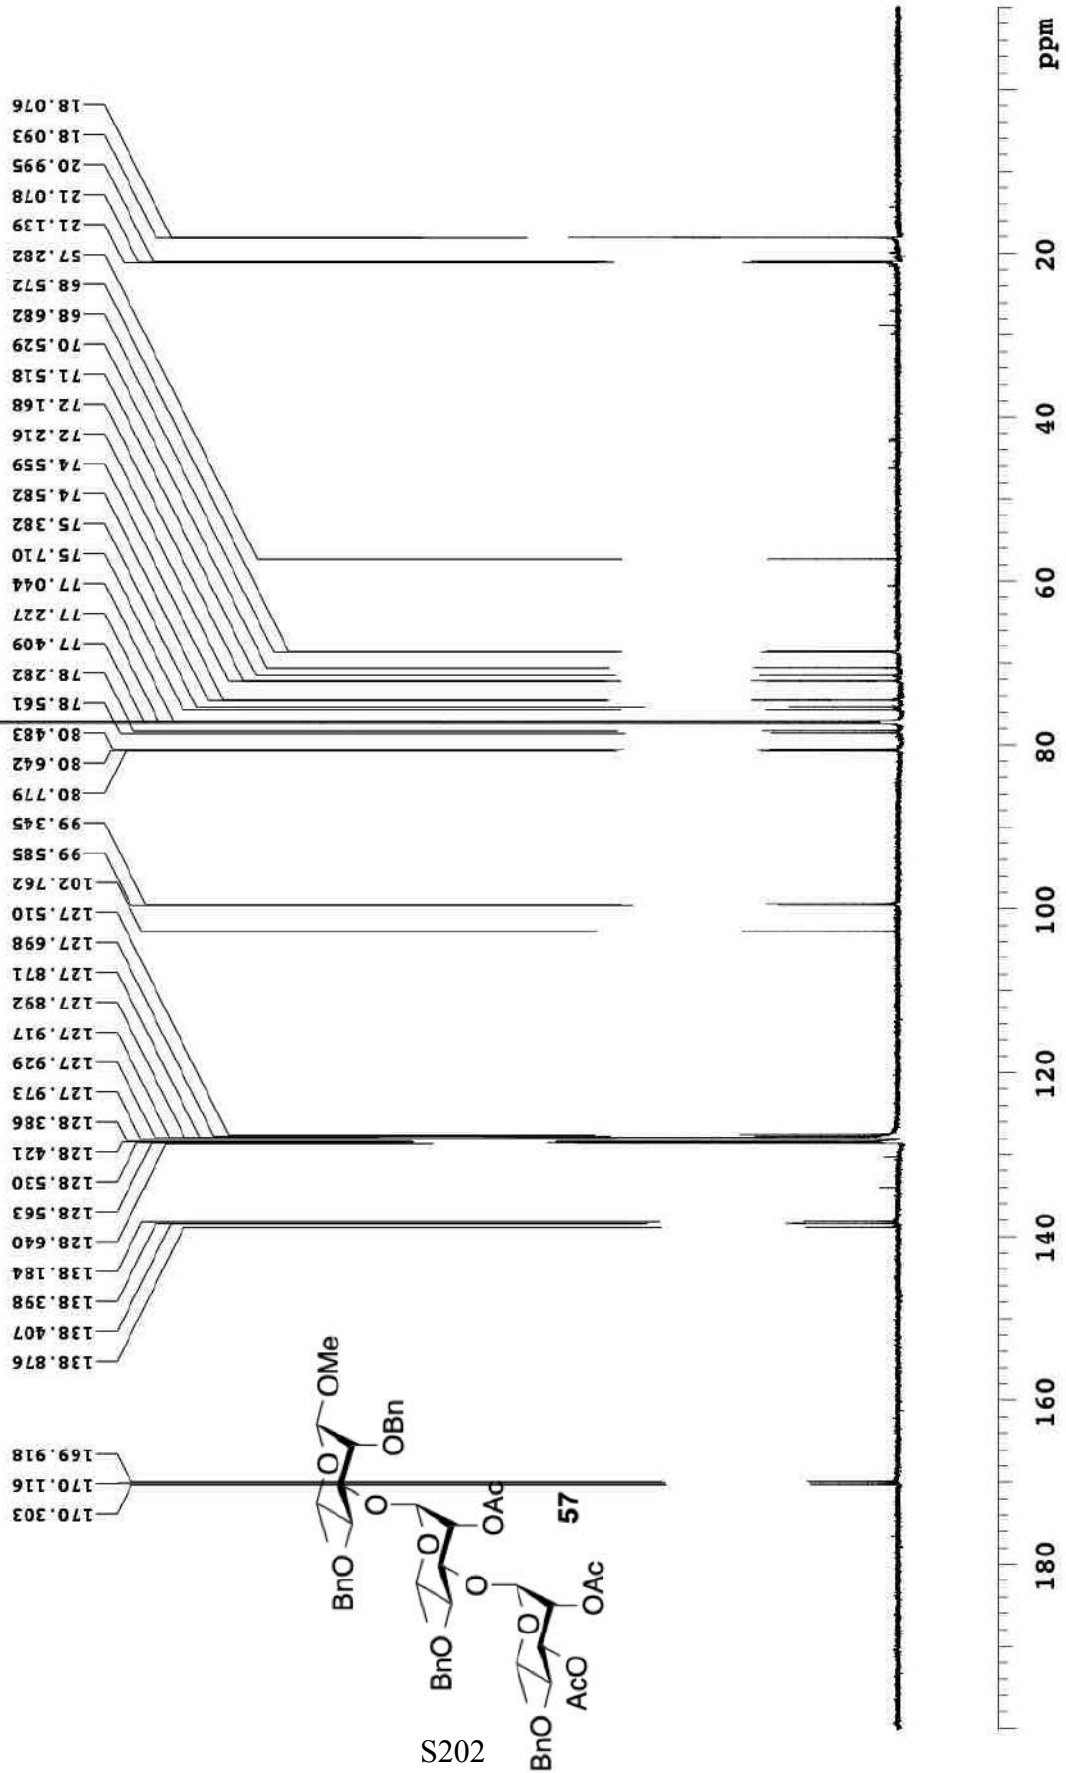

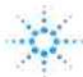

Bo-Shun, Ball-XY1-108-2  
699.762 MHz H1 1D in cdcl3 (ref. to CDCl3 @ 7.26 ppm)  
temp 27.5 C -> actual temp = 27.0 C, coldid probe

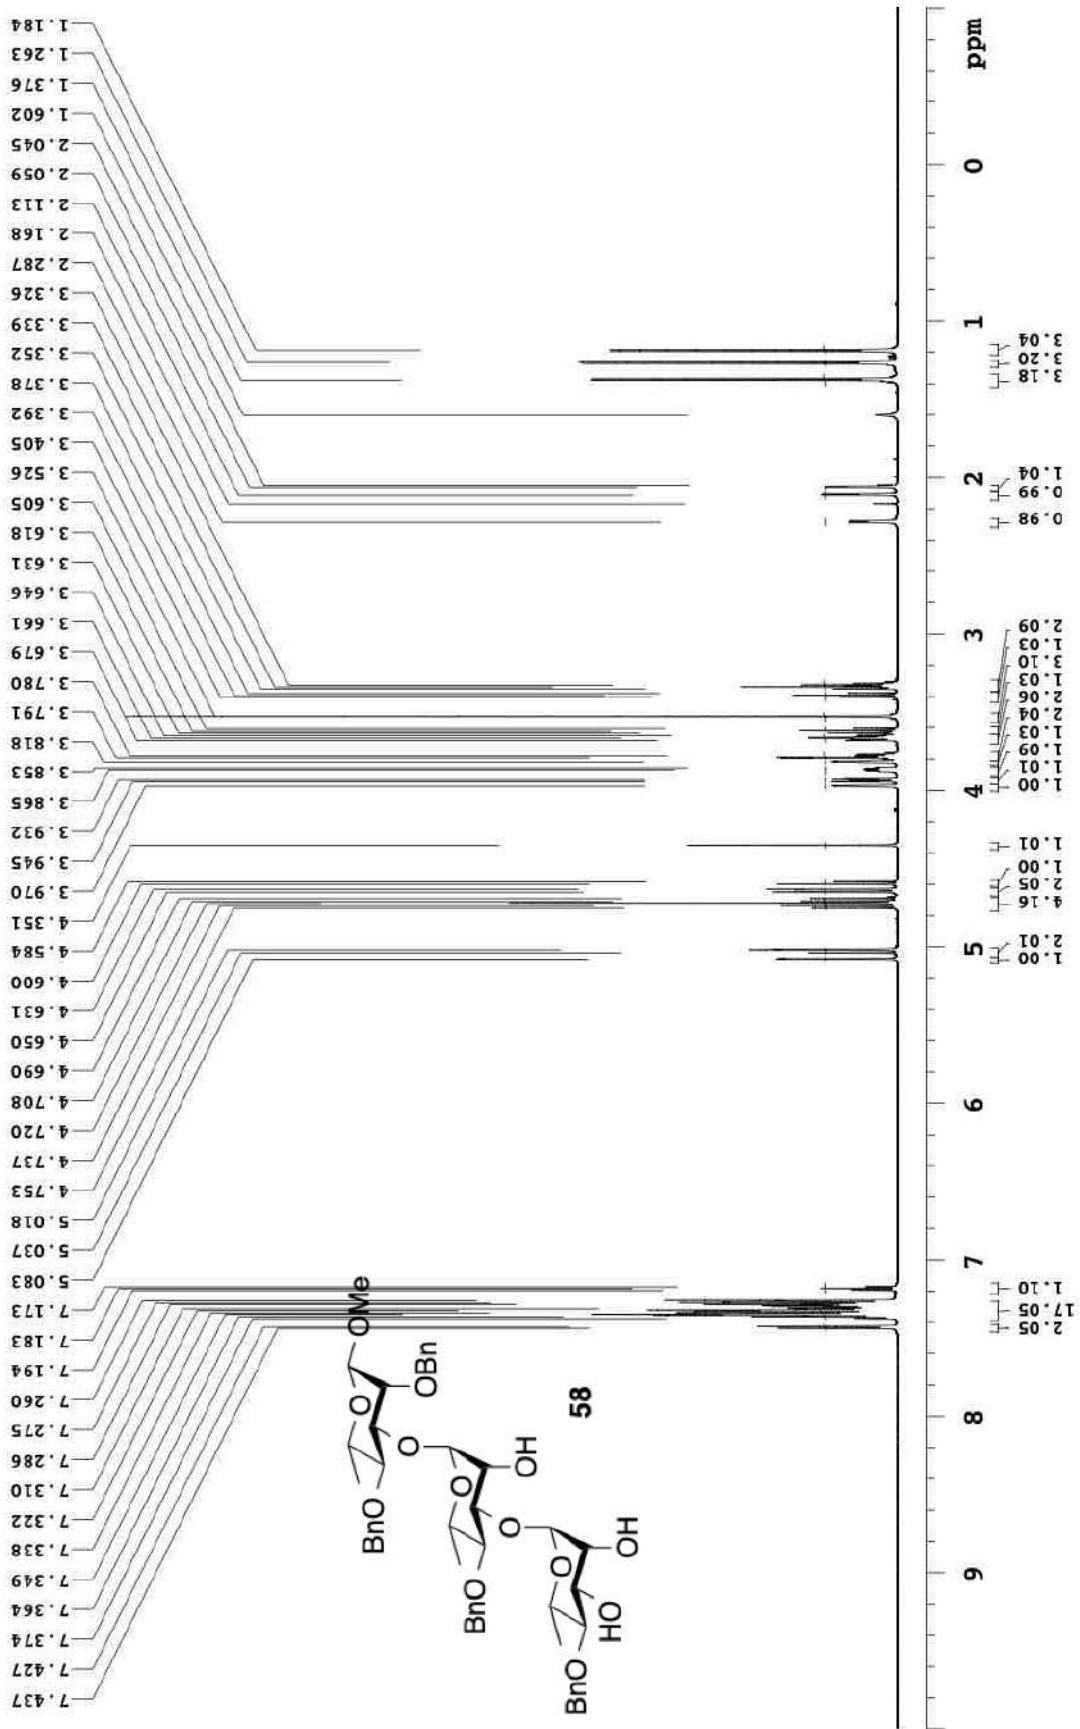

Recorded on: **v700, Feb 28 2017** Sweep Width(Hz): **48076.9** Acquisition Time(s): **1** Relaxation Delay(s): **1**  
 Pulse Sequence: **s2pul** Digital Res.(Hz/pt): **0.37** Hz per mm(Hz/mm): **153.92** Completed Scans: **256**

Bo-Shun, BalI-Xyl-108-2  
 175.975 MHz C13(H1) 1D in cdcl3 (ref. to CDCl3 @ 77.06 ppm)  
 temp 27.5 C -> actual temp = 27.0 C, coldid probe

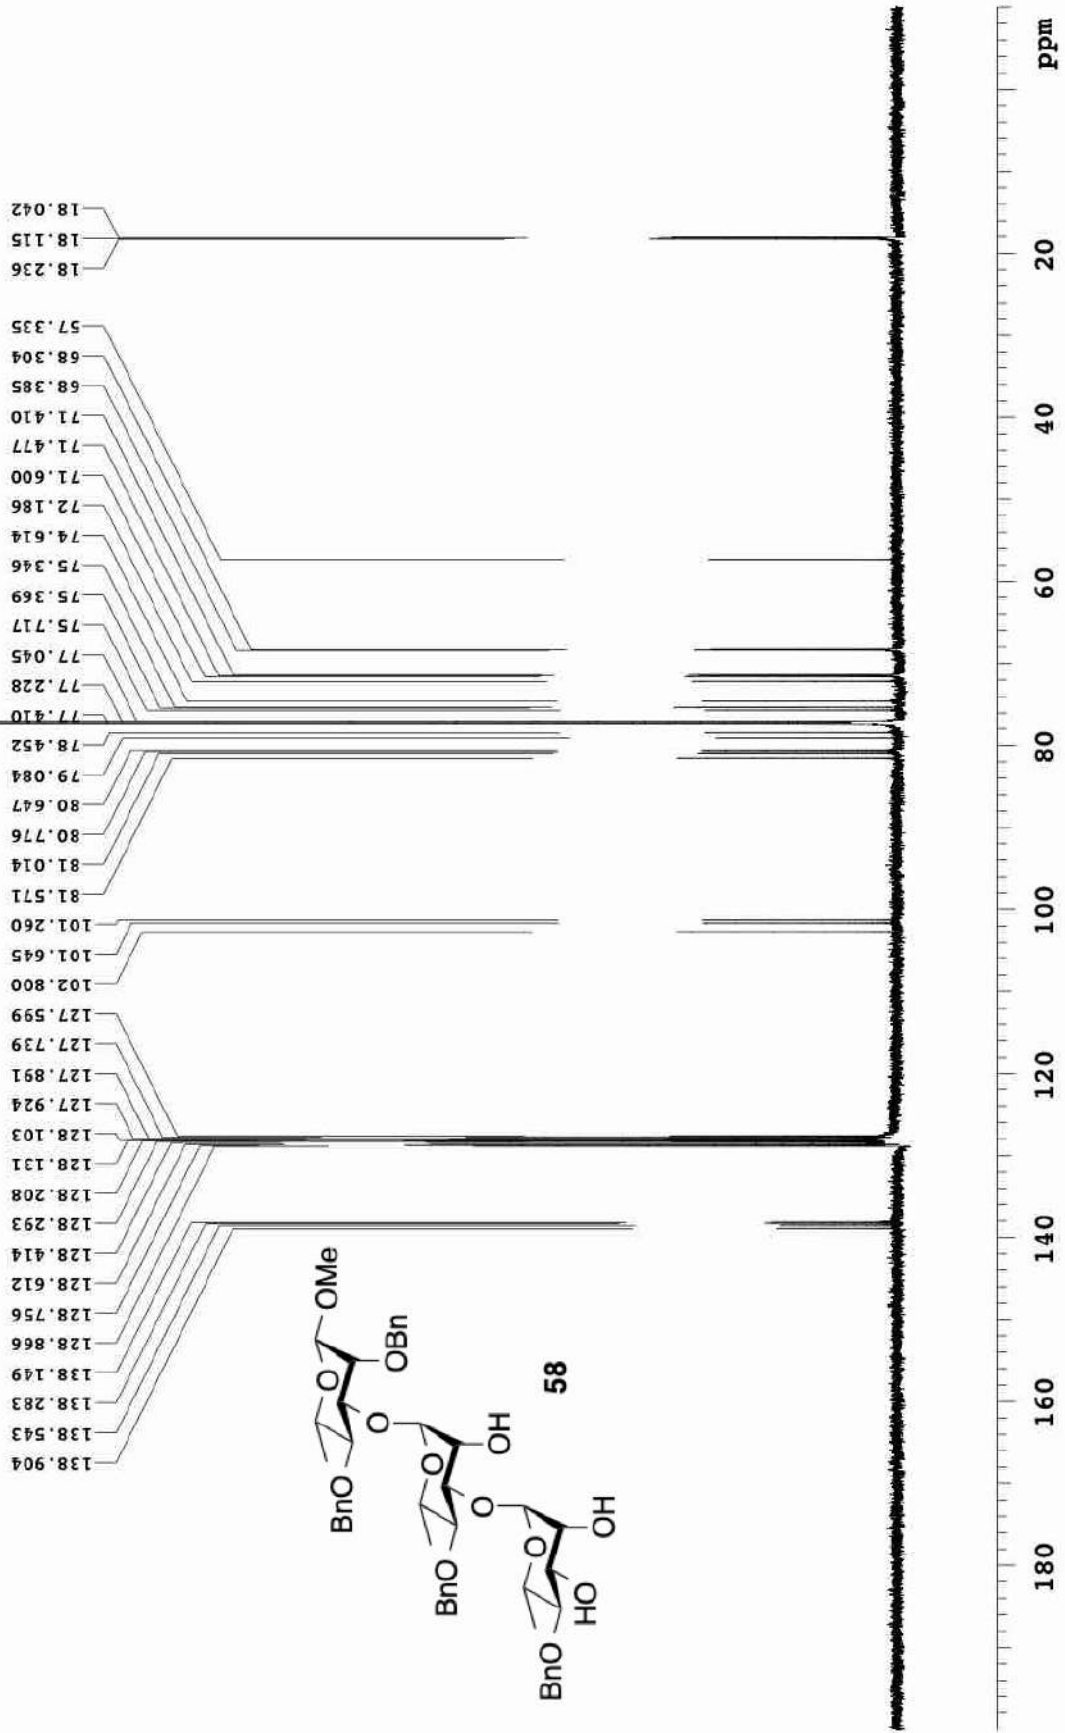

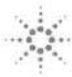

Agilent Technologies

Recorded on: **v700, Feb 9 2018**      Sweep Width(Hz): **8389.26**      Acquisition Time(s): **5**      Relaxation Delay(s): **0.1**  
Pulse Sequence: **PRESAT**      Digital Res.(Hz/pt): **0.13**      Hz per mm(Hz/mm): **34.95**      Completed Scans: **32**

Bo-Shun, Balli-XYL-157-2  
699.762 MHz H1 1D in cdcl3 (ref. to CDCl3 @ 7.26 ppm)  
temp 27.5 C -> actual temp = 27.0 C, coldid probe

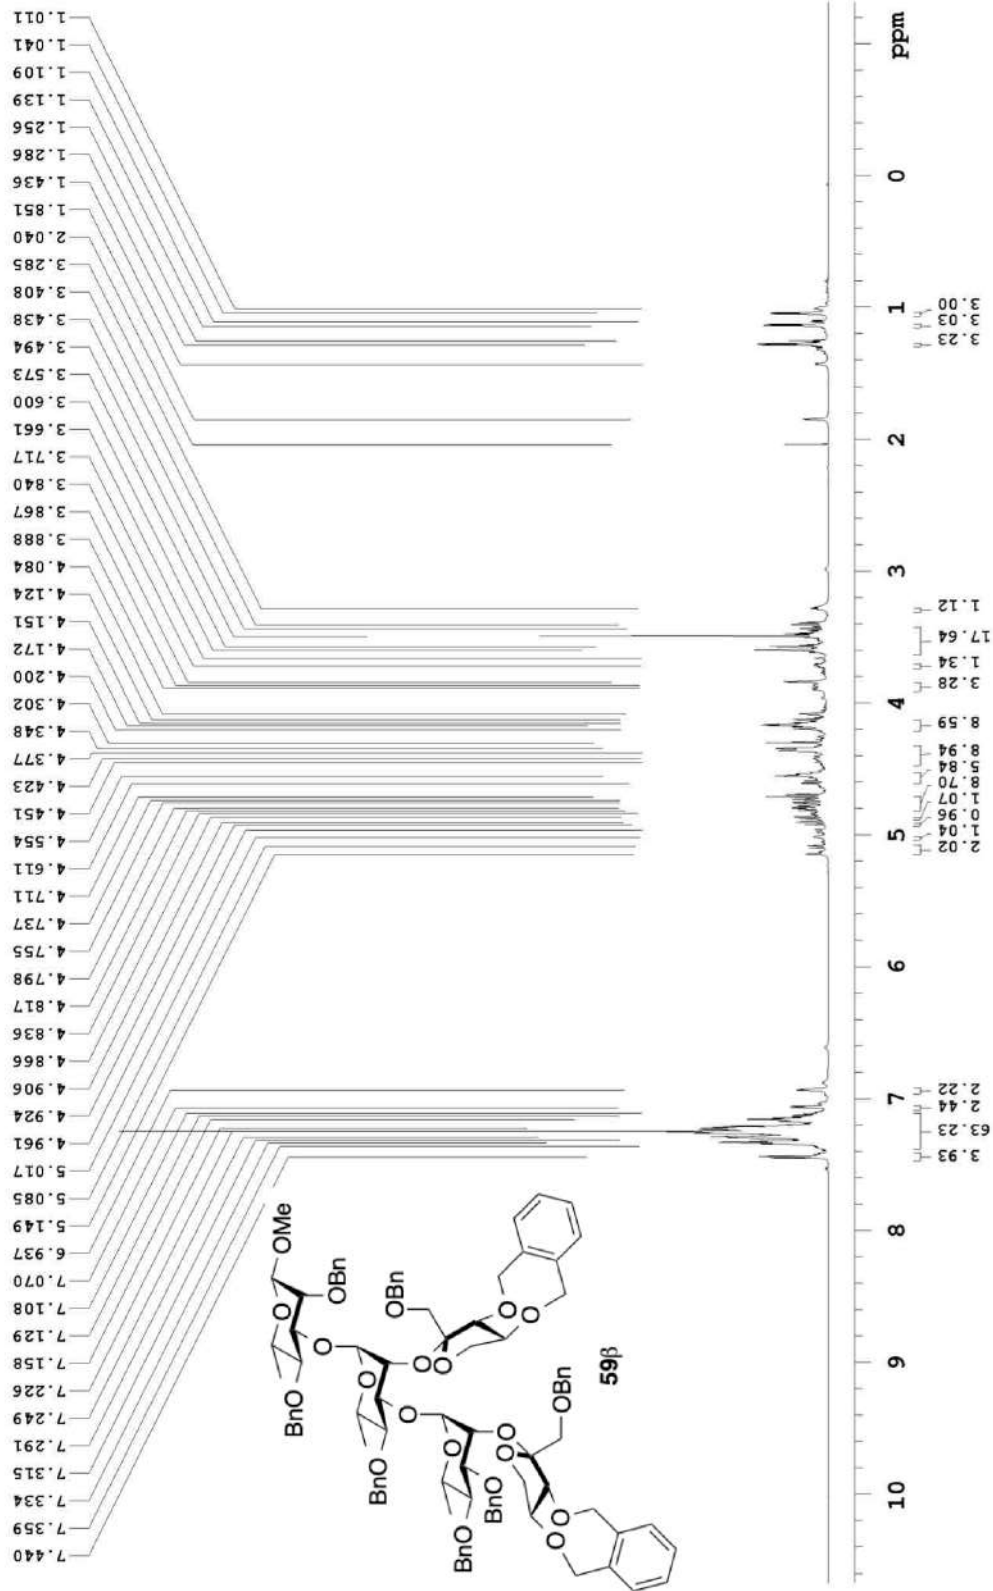

File: /mnt:/home9/llimtr/nmrdata/DATE\_FROM\_NMRSERVICE/Bo-Shun/2018.02.20/18.02.09.v7\_Balli-XYL-157-2\_loc6\_20.22\_H1\_1D

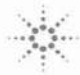

**Agilent Technologies**

Recorded on: **v700, Feb 9 2018**      Sweep Width(Hz): **48076.9**      Acquisition Time(s): **1**      Relaxation Delay(s): **1**  
 Pulse Sequence: **s2pul**      Digital Res. (Hz/pt): **0.37**      Hz per mm(Hz/mm): **153.96**      Completed Scans: **812**

Bo-Shun, Ball-XYL-157-2  
 175.975 MHz C13{H1} 1D in cdcl3 (ref. to CDCl3 @ 77.06 ppm)  
 temp 27.5 C -> actual temp = 27.0 C, coldid probe

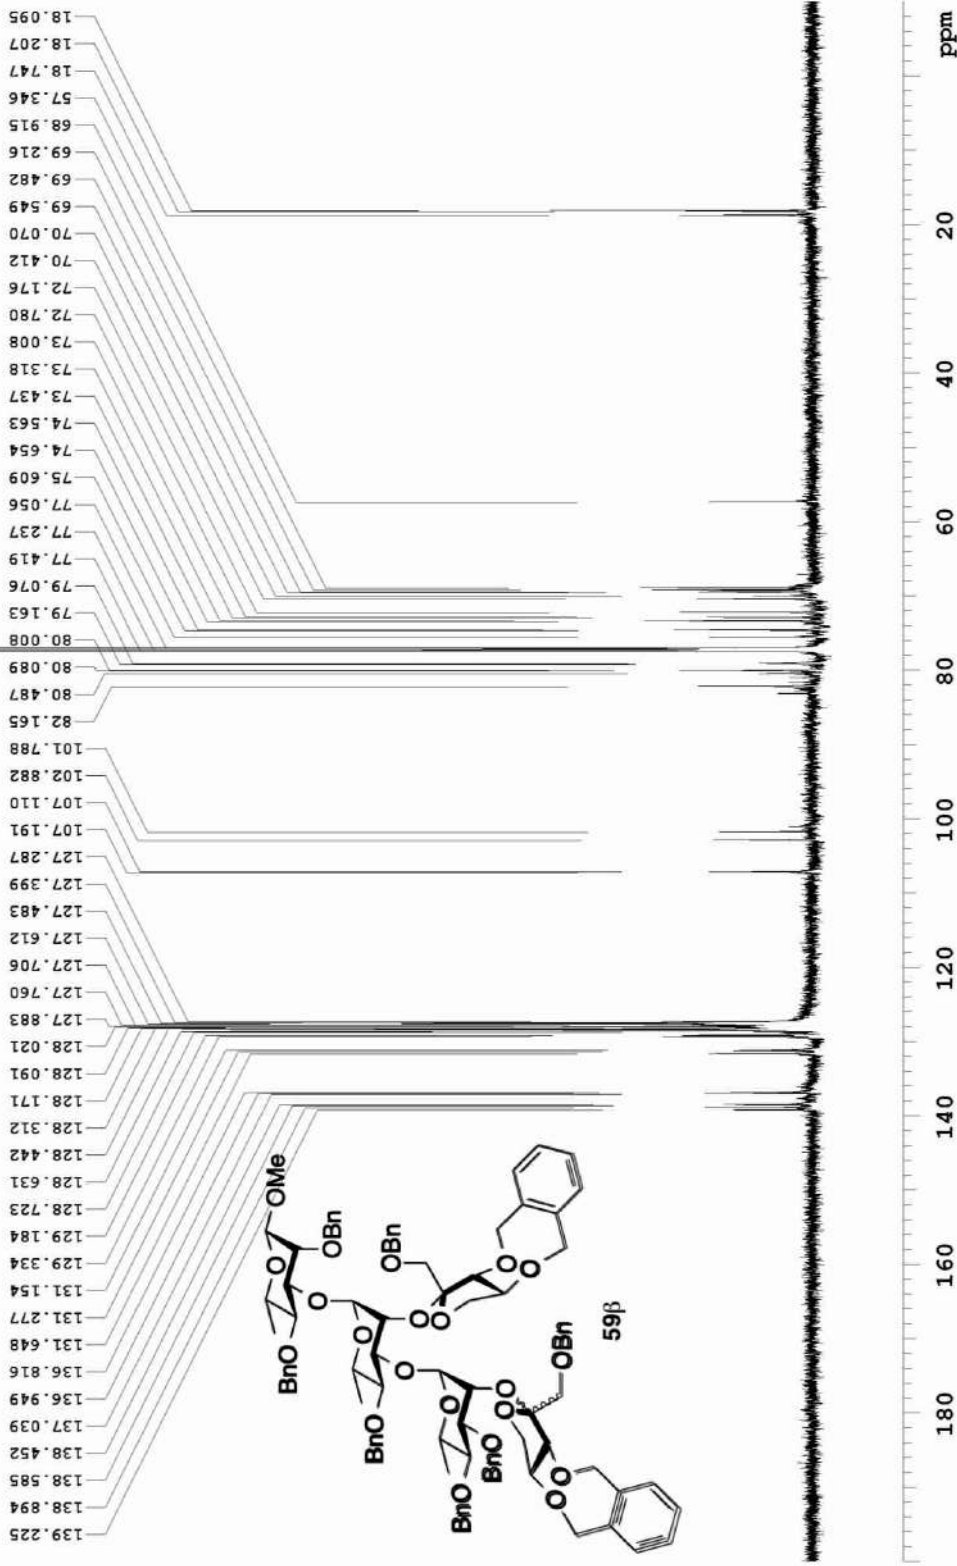





Bo-Shun, Ball-XYL-150  
499.797 MHz H1 1D in cdcl3 (ref. to CDCl3 @ 7.26 ppm)  
temp 27.7 C -> actual temp = 27.0 C, coldludal probe

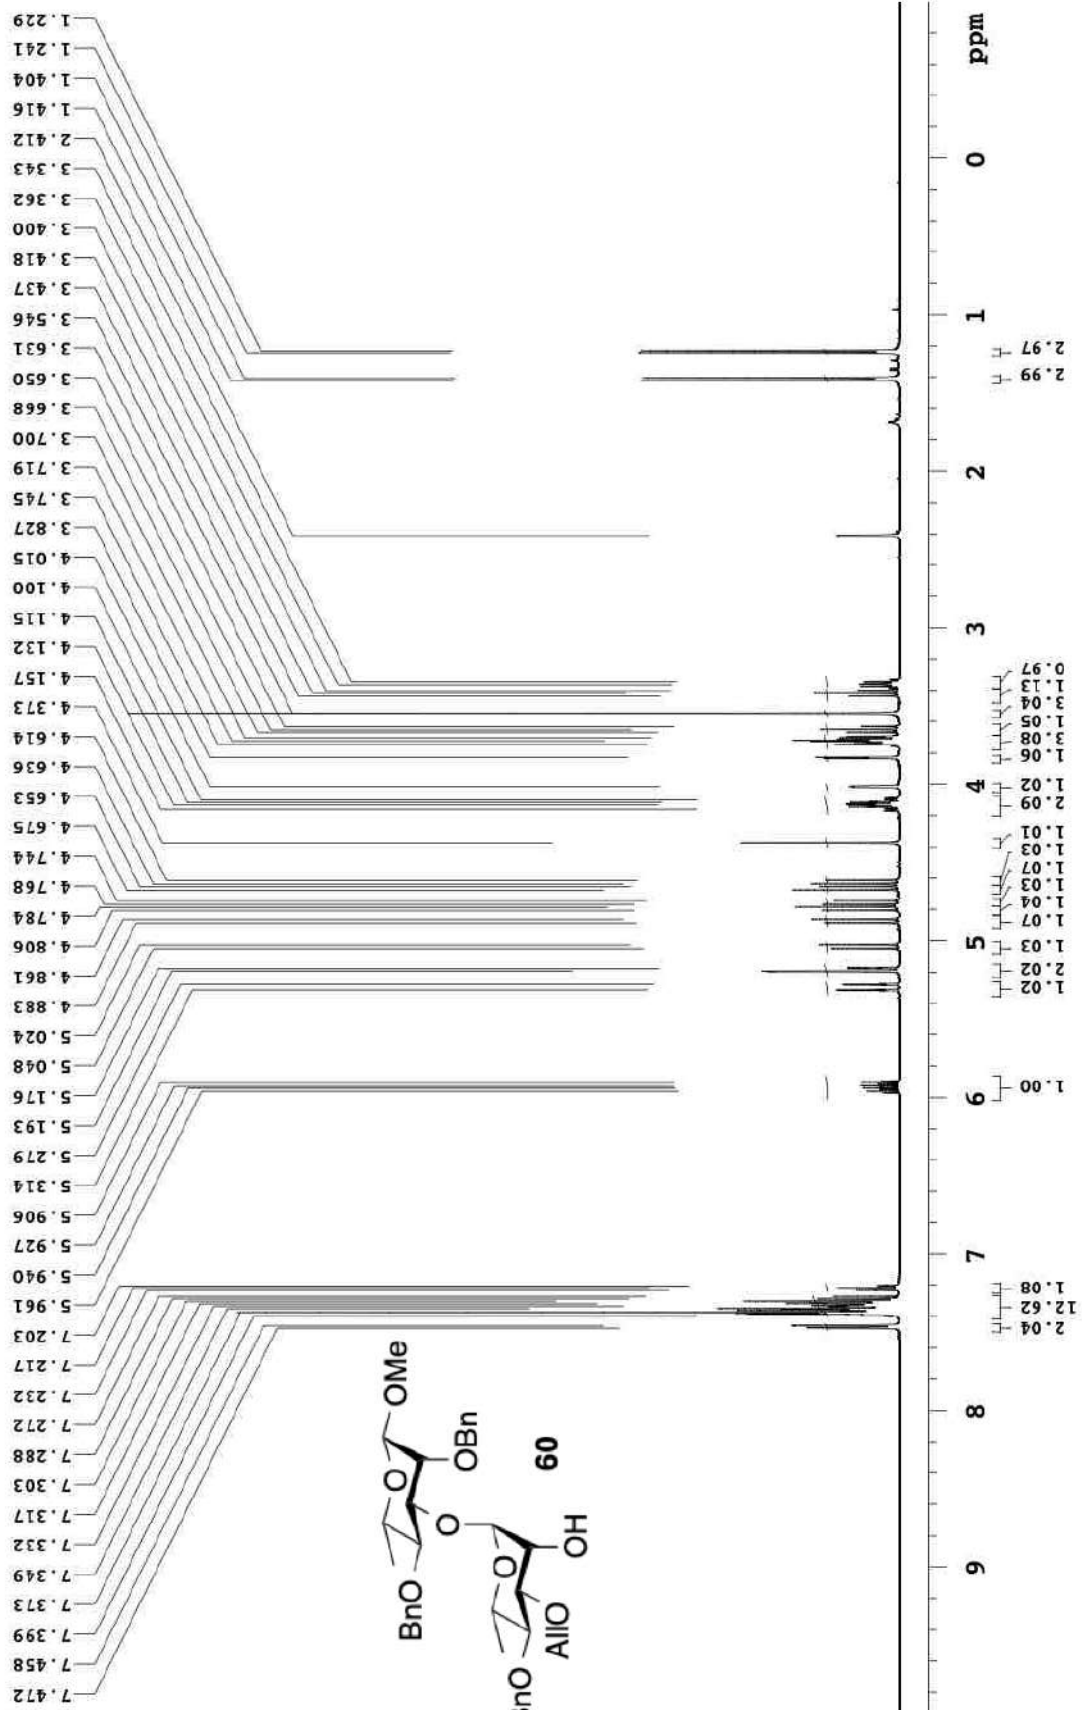

S207

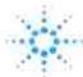

Department of Chemistry, University of Alberta

Recorded on: **u500, Aug 18 2017**    Sweep Width(Hz): **33783.8**    Acquisition Time(s): **1**    Relaxation Delay(s): **1**  
Pulse Sequence: **s2pul**    Digital Res.(Hz/ppm): **0.26**    Hz per mm(Hz/mm): **110.08**    Completed Scans: **16**

Bo-Shun, Ball-XYL-150  
125.688 MHz C13(H1) 1D in cdcl3 (ref. to CDC13 @ 77.06 ppm)  
temp 27.7 C -> actual temp = 27.0 C, coldidial probe

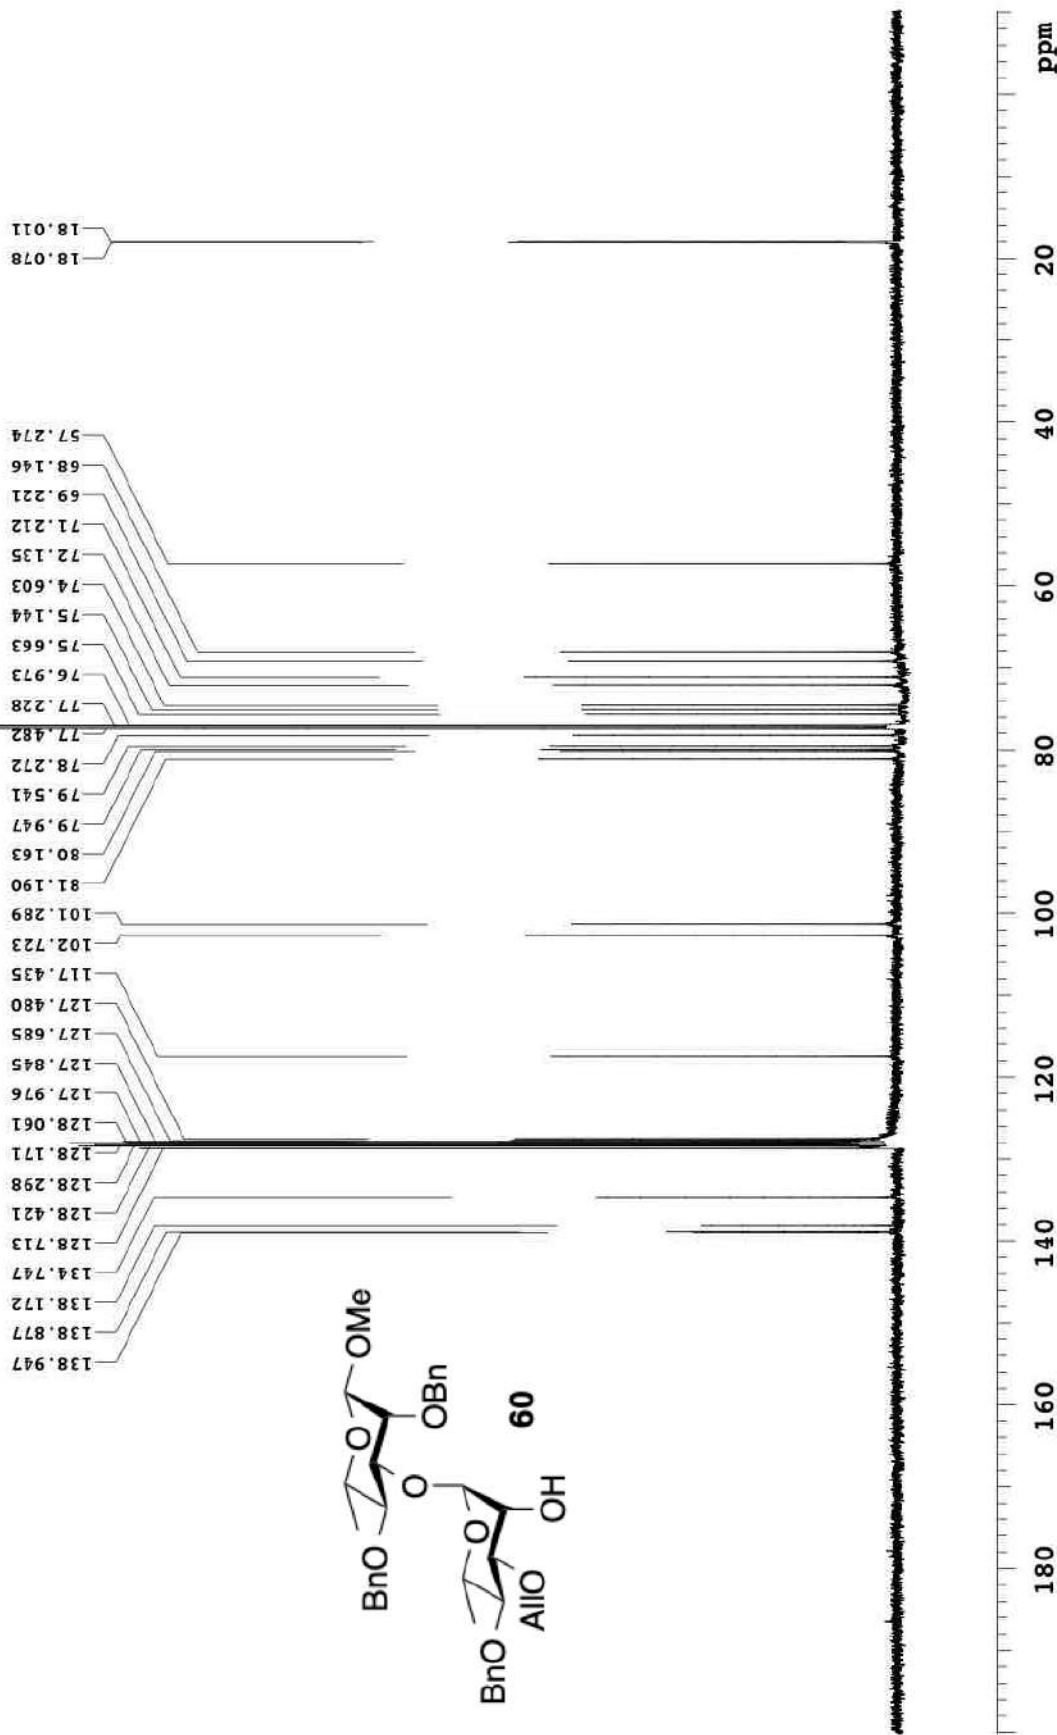

S208





Department of Chemistry, University of Alberta

Recorded on: **v700, Aug 23 2017**

Sweep Width(Hz): **8389.26**

Acquisition Time(s): **5**

Relaxation Delay(s): **0.1**

Pulse Sequence: **PRESAT**

Digital Res.(Hz/pt): **0.13**

Hz per mm(Hz/mm): **32.07**

Completed Scans: **8**

Bo-Shun, Balt-XYL-151-2  
699.762 MHz H1 1D in cdcl3 (ref. to CDCl3 @ 7.26 ppm)  
temp 27.5 C -> actual temp = 27.0 C, coldid probe

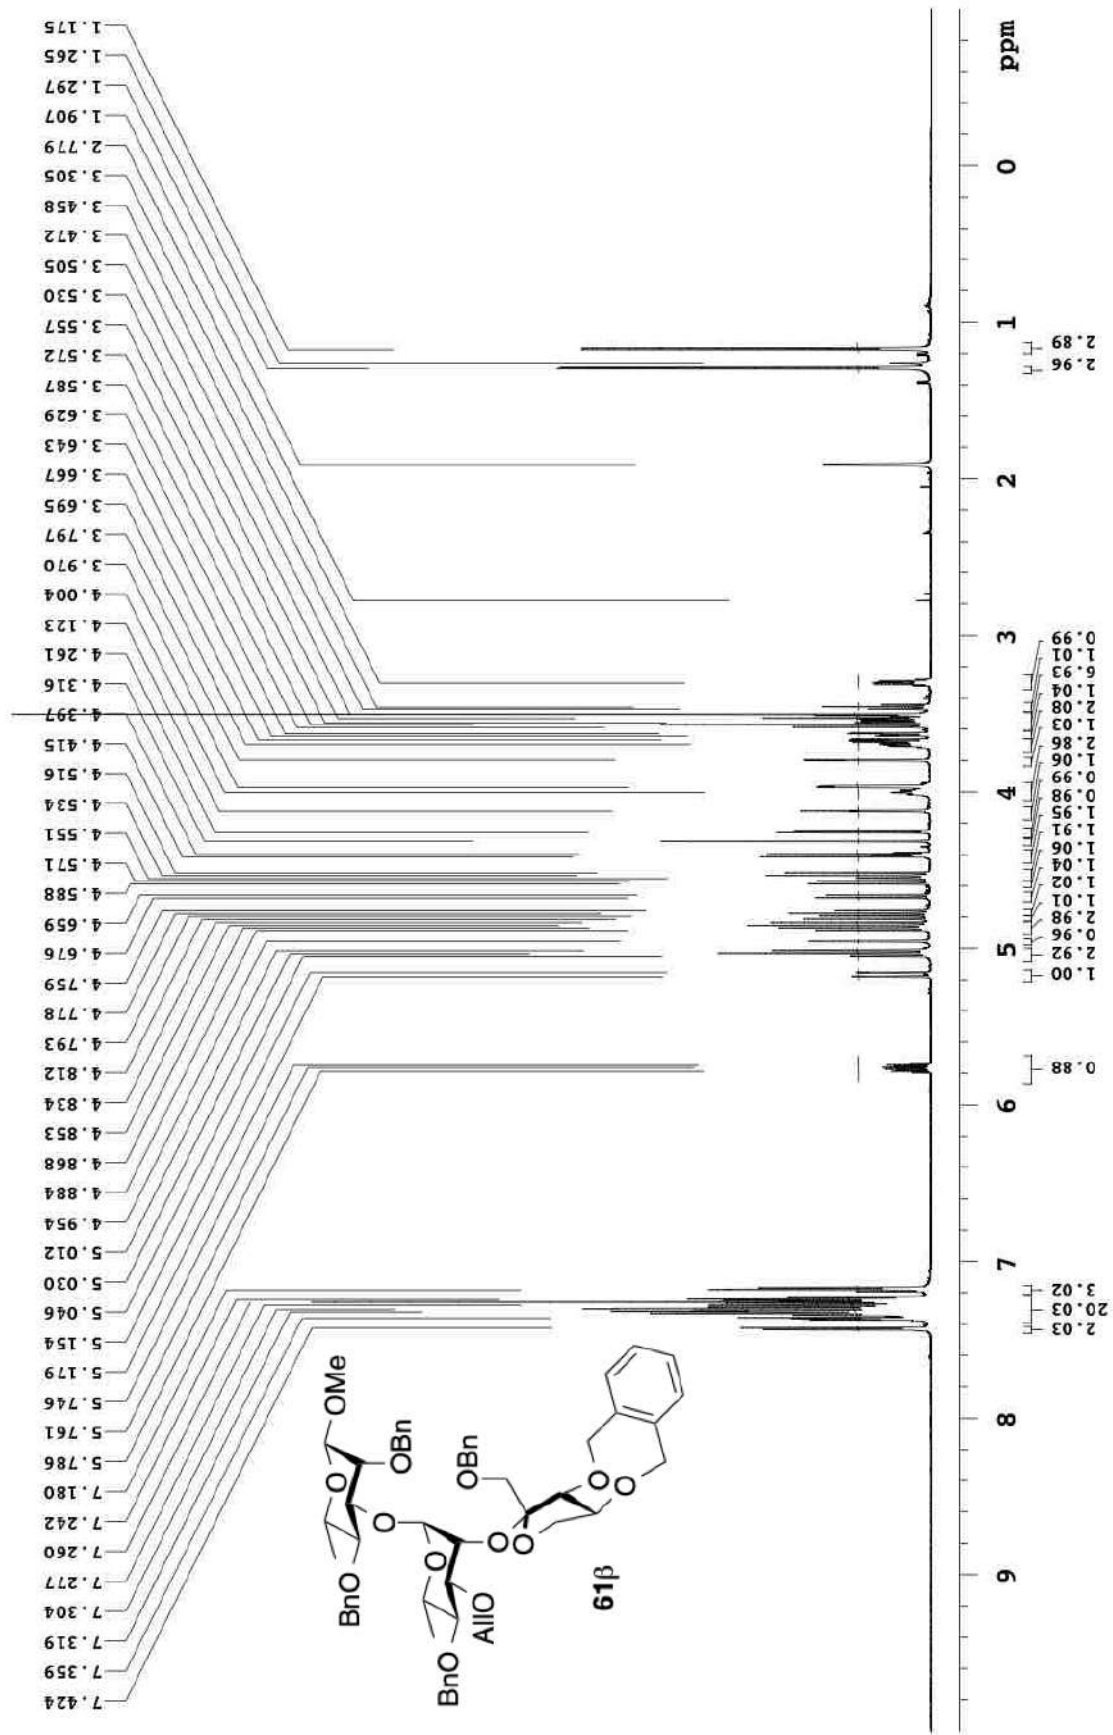

S209









Recorded on: **u500, Oct 20 2017**    Sweep Width(Hz): **33783.8**    Acquisition Time(s): **1**    Relaxation Delay(s): **1**  
Pulse Sequence: **s2pul**    Digital Res.(Hz/pt): **0.26**    Hz per mm(Hz/mm): **109.9**    Completed Scans: **96**

Bo-Shun, Ball-XYL-152-2  
125.688 MHz C13(H1) 1D in cdcl3 (ref. to CDCl3 @ 77.06 ppm)  
temp 27.7 C -> actual temp = 27.0 C, coldluid probe

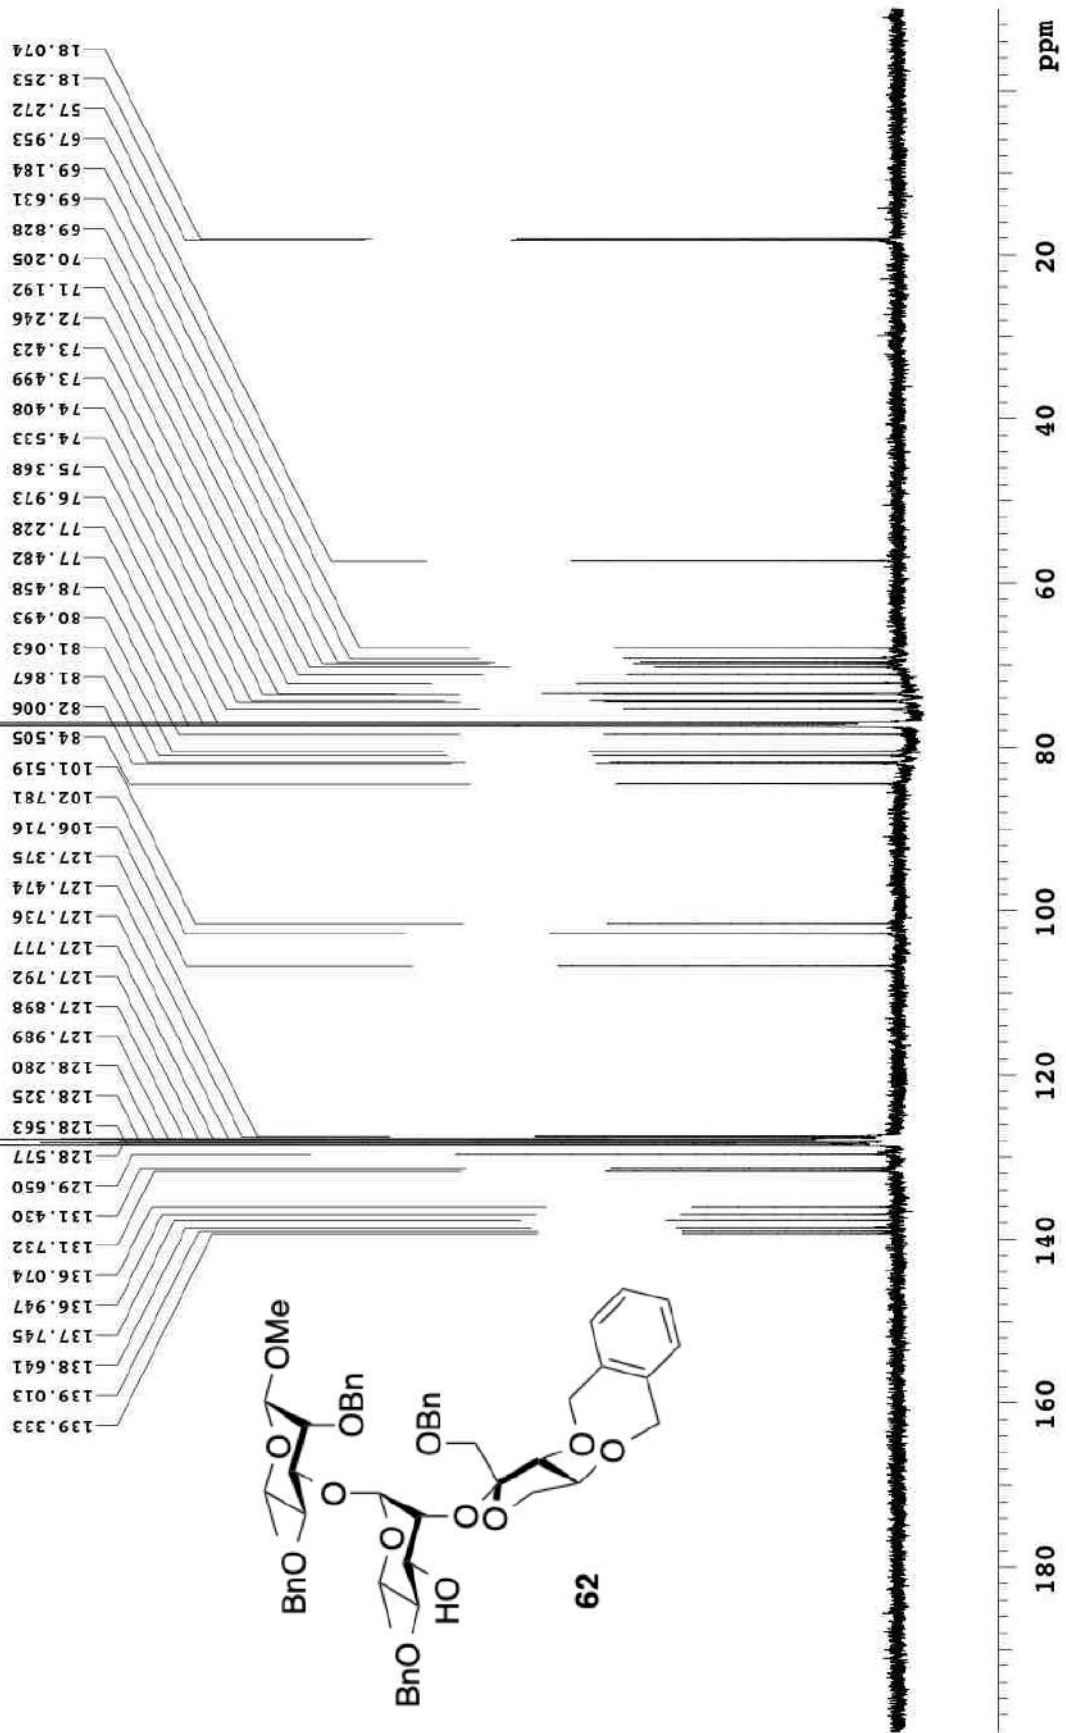

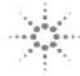

Department of Chemistry, University of Alberta

Recorded on: **v700\_Jan 31 2018** Sweep Width(Hz): **8389.26** Acquisition Time(s): **5** Relaxation Delay(s): **0.1**  
Pulse Sequence: **PRESAT** Digital Res.(Hz/pt): **0.13** Hz per mm(Hz/mm): **34.95** Completed Scans: **8**

Bo-Shun, Balli-XYL-155  
699.762 MHz H1 1D in cdc13 (ref. to CDC13 @ 7.26 ppm)  
temp 27.5 C -> actual temp = 27.0 C, coldid probe

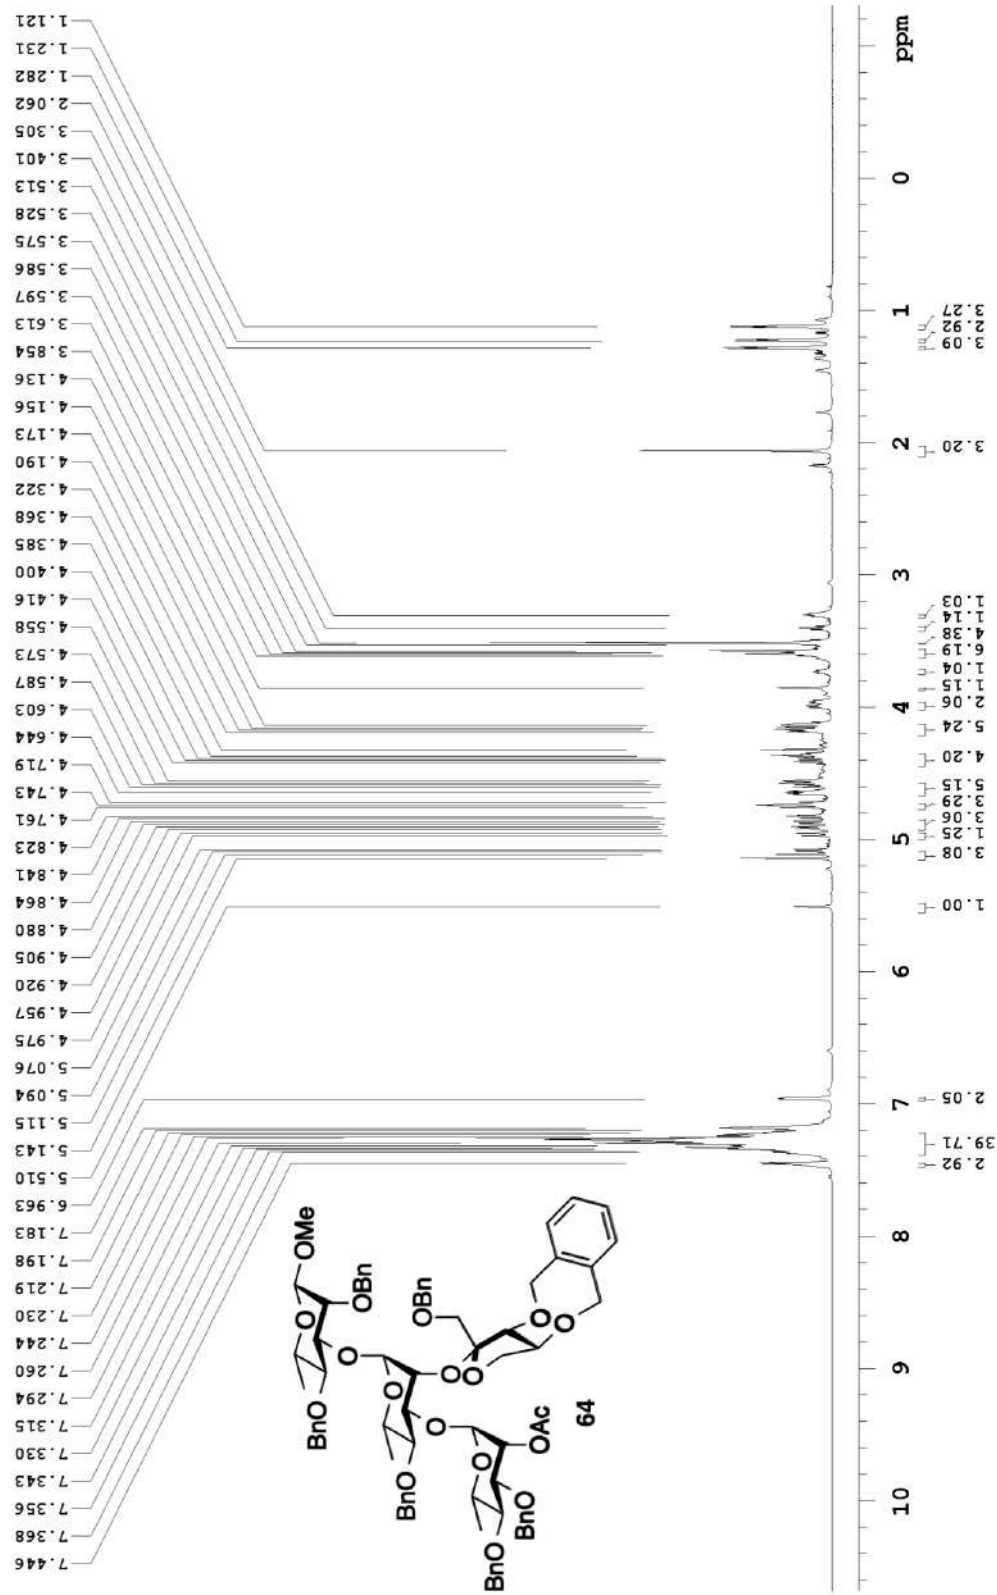

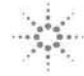

# Agilent Technologies

Recorded on: **V700, Jan 31 2018**  
Pulse Sequence: **s2pul**

Sweep Width(Hz): **48076.9**  
Digital Res.(Hz/pt): **0.37**

Acquisition Time(s): **1**  
Hz per mm(Hz/mm): **153.83**

Relaxation Delay(s): **1**  
Completed Scans: **256**

Bo-Shun, Baii-XYL-155  
175.975 MHz C13{H1} 1D in cdcl3 (ref. to CDCl3 @ 77.06 ppm)  
temp 27.5 C -> actual temp = 27.0 C, coldid probe

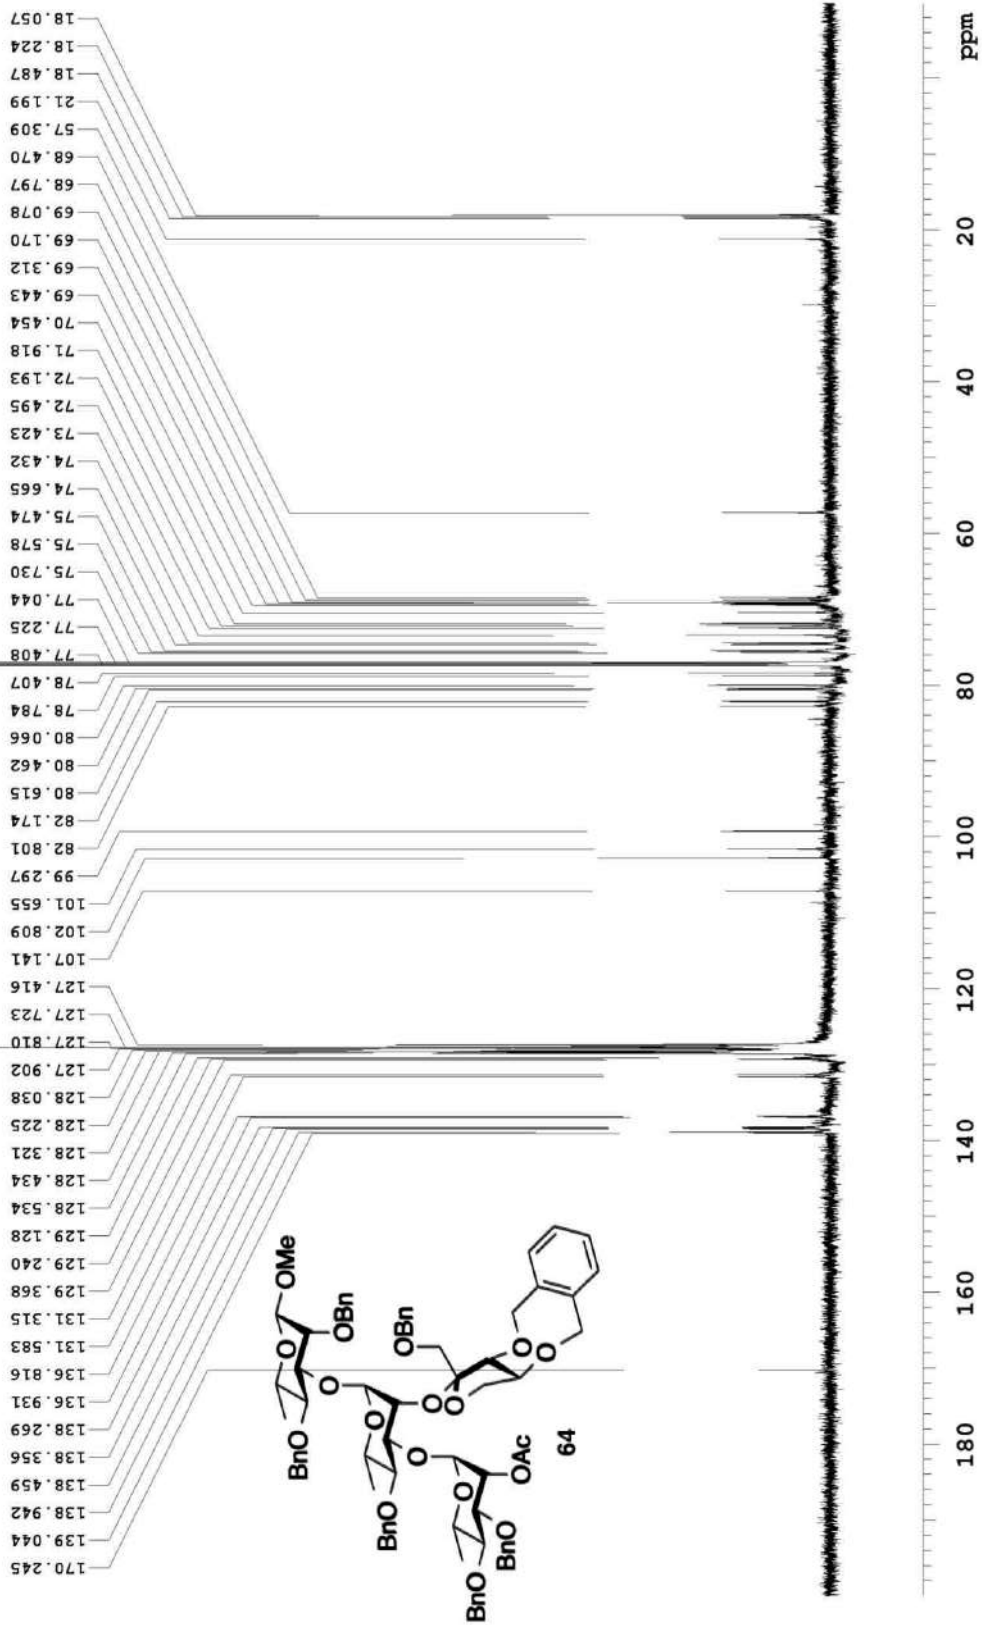

Recorded on: **u500, Jun 3 2017**      Sweep Width(Hz): **6009.62**      Acquisition Time(s): **5**      Relaxation Delay(s): **0.1**  
 Pulse Sequence: **PRESAT**      Digital Res.(Hz/ppm): **0.09**      Hz per mm(Hz/mm): **25.04**      Completed Scans: **8**

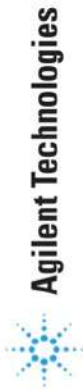

Bo-Shun, Ball-XYL-135  
 499.797 MHz H1 1D in cdcl3 (ref. to CDCl3 @ 7.26 ppm)  
 temp 27.7 C -> actual temp = 27.0 C; coldludal probe

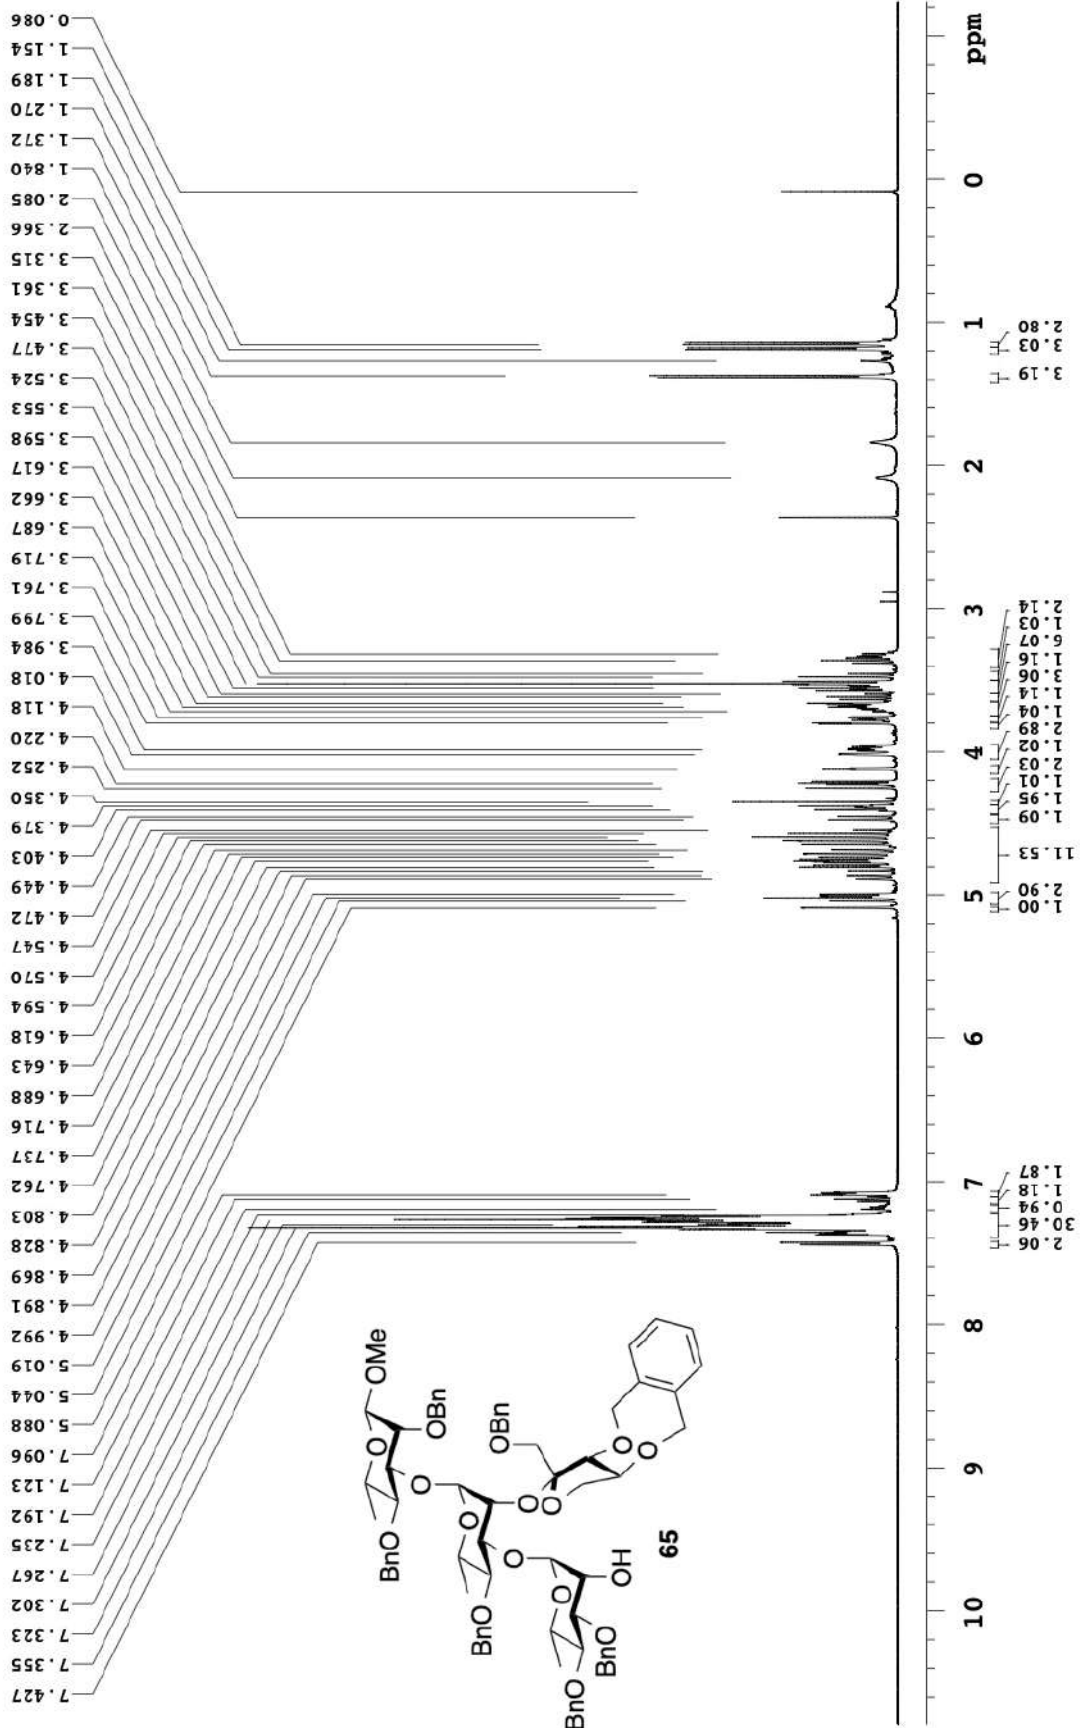

S215



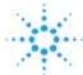

Recorded on: **u500, Jun 3 2017**      Sweep Width(Hz): **33783.8**      Acquisition Time(s): **1**      Relaxation Delay(s): **1**  
Pulse Sequence: **s2pul**      Digital Res.(Hz/pt): **0.26**      Hz per mm(Hz/mm): **104.68**      Completed Scans: **176**

Bo-Shun, Ball-XYL-135  
125.688 MHz C13(H1) 1D in cdcl3 (ref. to CDCl3 @ 77.06 ppm)  
temp 27.7 C -> actual temp = 27.0 C; coldlial probe

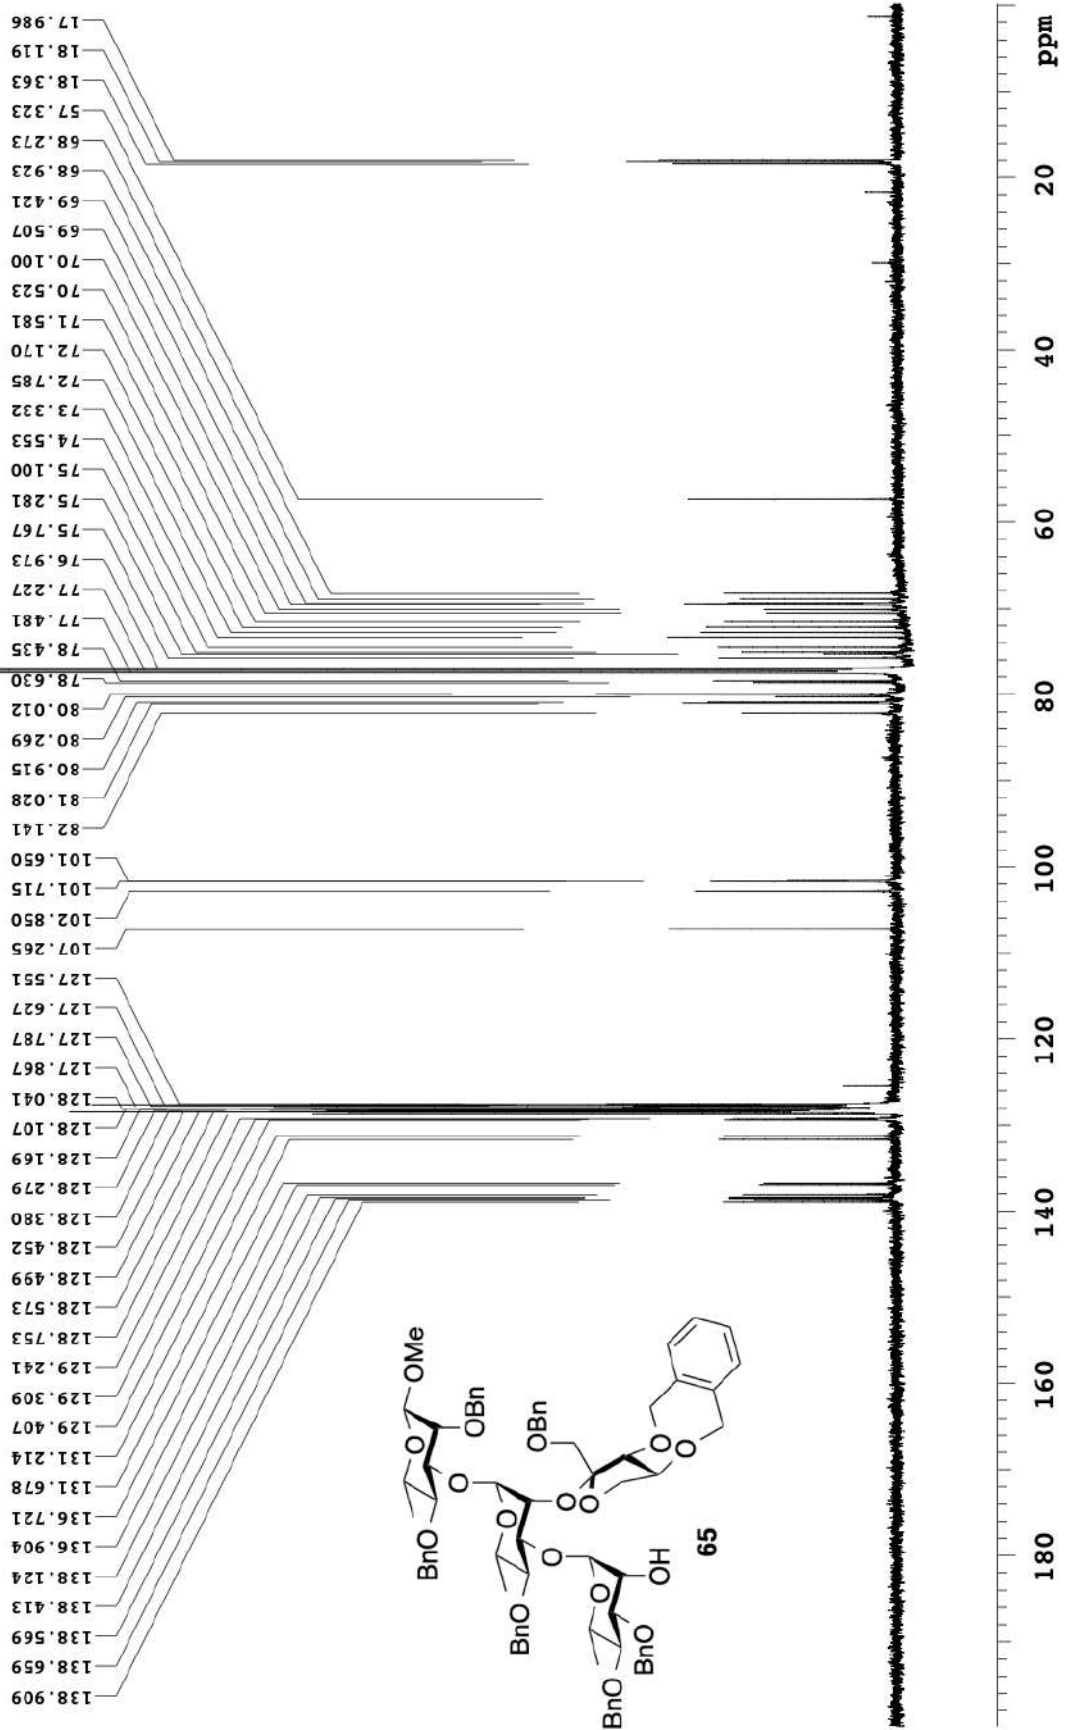

S216

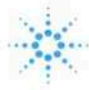

# Agilent Technologies

Department of Chemistry, University of Alberta

Recorded on: u500, Jun 24 2016  
Pulse Sequence: ROESY

Sweep Width F2F1(Hz): 6009.62 Acquisition Time(s): 1  
Digital Res. F2F1(Hz/pt): 1.47 Hz/mm F2F1(Hz/mm): 6.41 Hz/mm

Relaxation Delay(s): 1  
No. of Scans/Increments 81 170

Bo-Shun, Ball-XYL-043-1  
499.806 MHz H1 ROESY in cdcl3 (ref. to CDC13 @ 7.26 ppm), temp 27.7 C -> actual temp = 27.0 C, cold dual probe

H-1a, H-1b

H-3

OBz

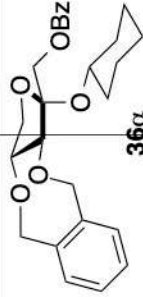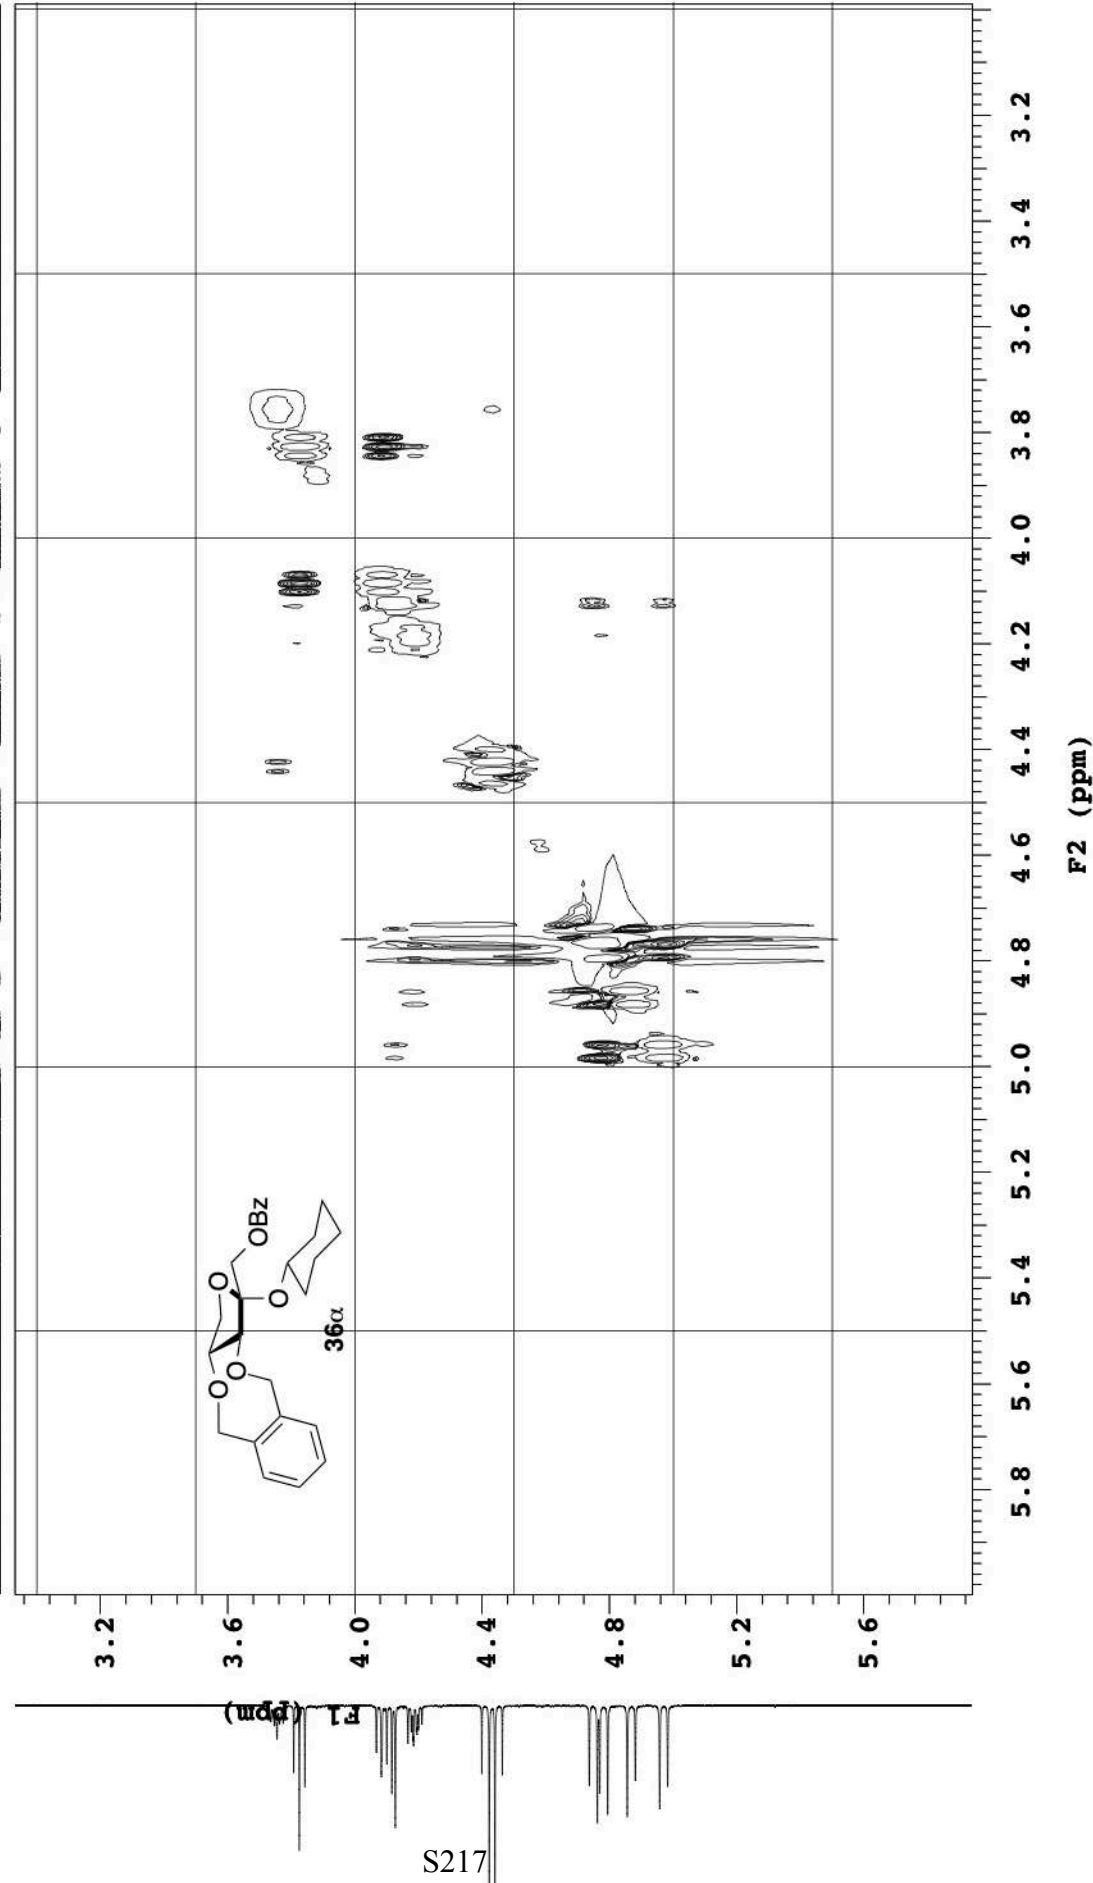

S217

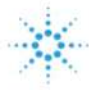

Bo-Shun, Ball-XYL-043-2  
499.806 MHz H1 ROESY in cdcl3 (ref. to CDC13 @ 7.26 ppm), temp 27.7 C -> actual temp = 27.0 C, cold dual probe

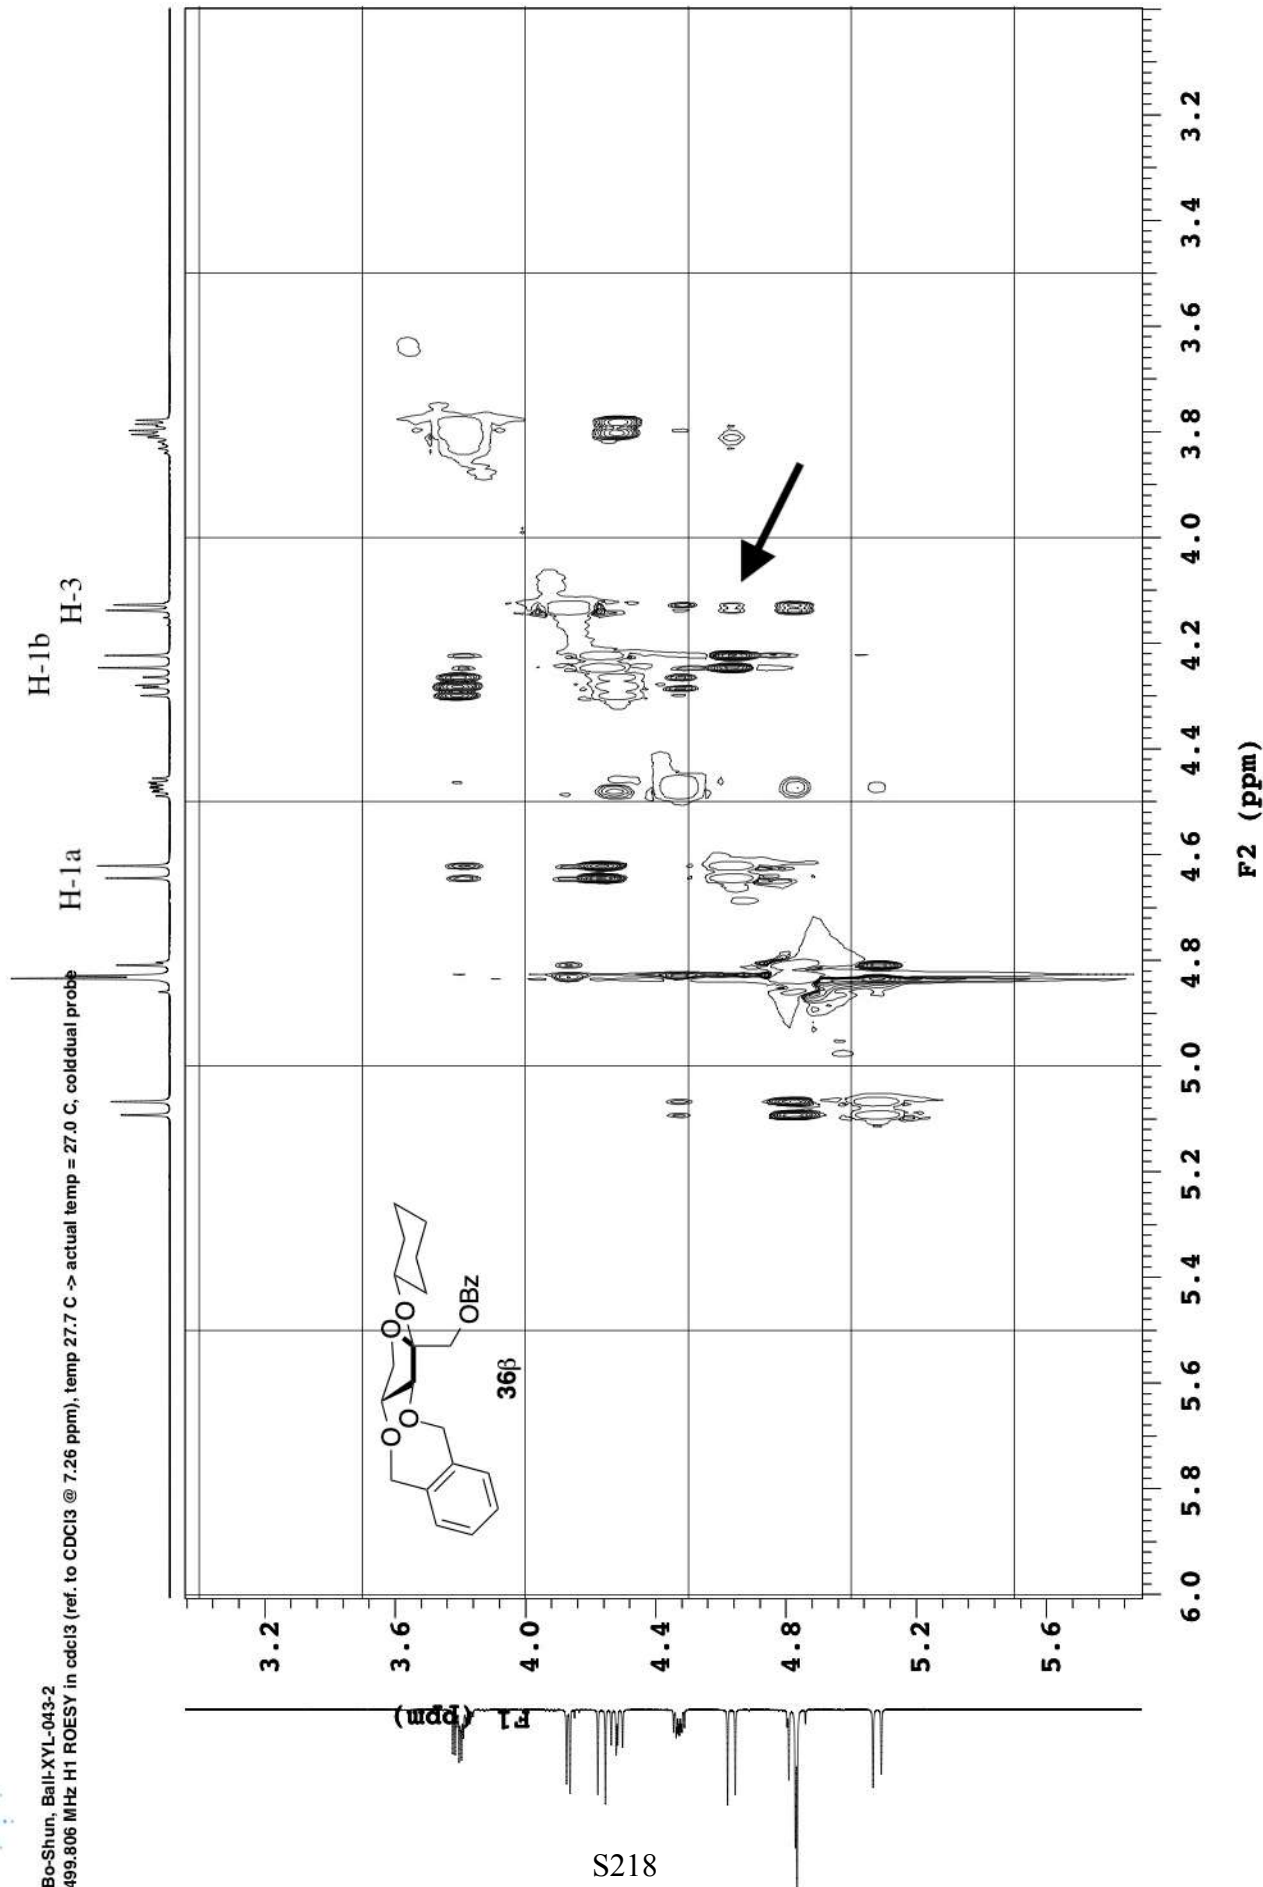

S218
